# Supplementary material for: Pokkali: A Naturally Evolved Salt-Tolerant Rice Shows a Distinguished Set of lncRNAs Possibly Contributing to the Tolerant Phenotype
Source: MDPI journal article supplement (doi:10.3390/ijms241411677), 2023-07-20
Supplement: s1 [file s1]

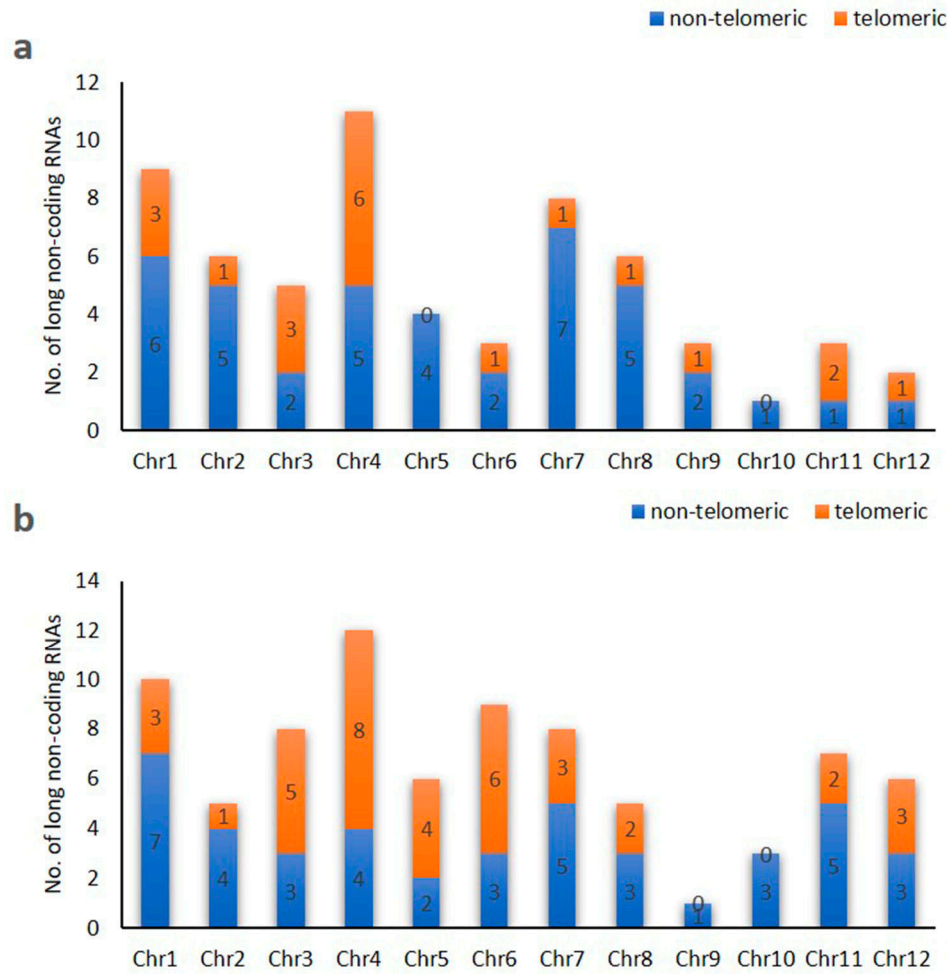

**Figure S1:** Figure depicts the number of lncRNAs present on the telomeric region of each chromosome in rice genotype (a) IR64 and (b) Pokkali.

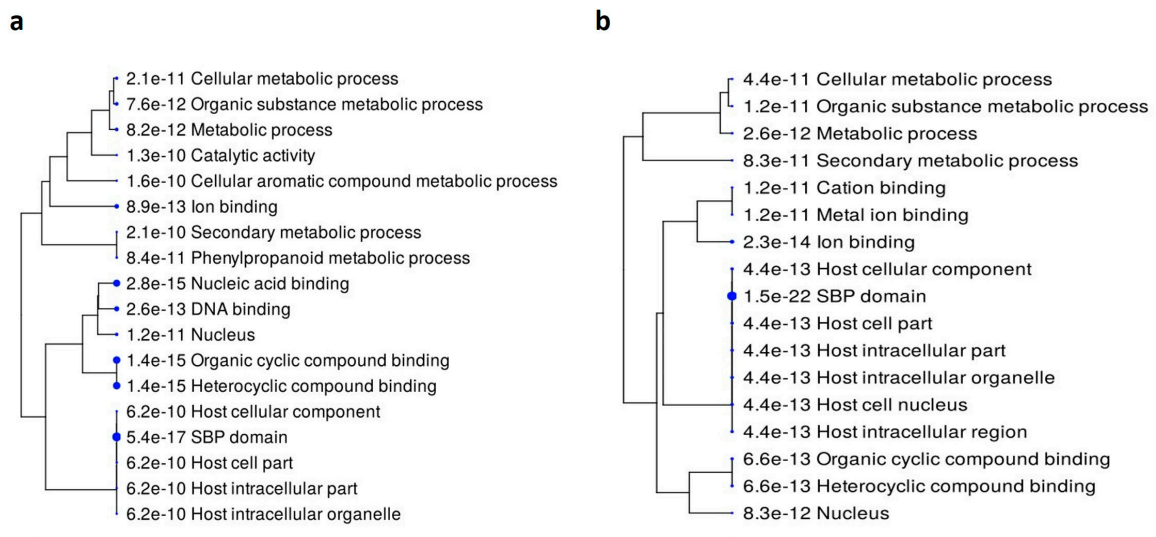

**Figure S2:** A hierarchical clustering tree summarizes the correlation among significant pathways in (a) IR64 and (b) Pokkali. Pathways with many shared genes are clustered together. Bigger dots indicate more significant *p*-values.

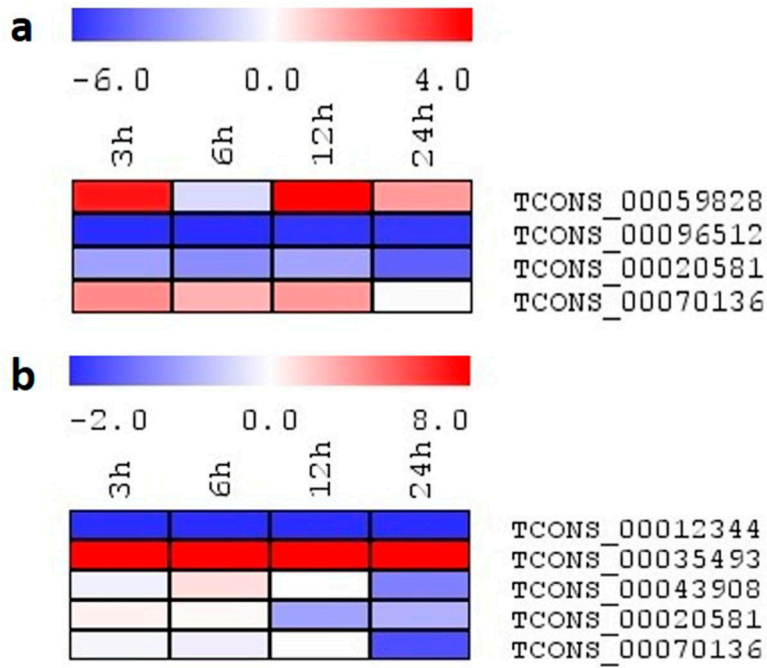

**Figure S3 (a,b):** The heatmap has been generated based on the log2 fold-change values showing differential expression of lncRNAs in rice genotypes (a) IR64 and (b) Pokkali exposed to ABA at 0, 3, 6, 12, and 24 h.

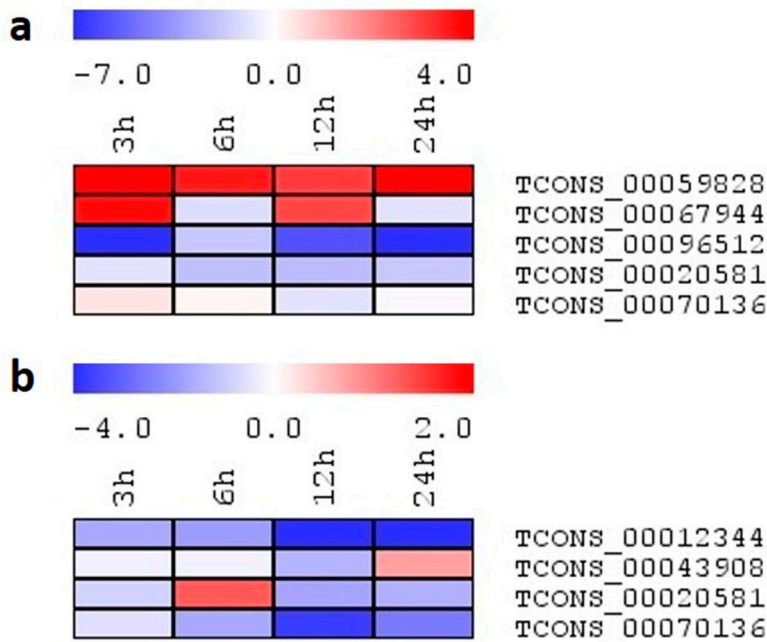

**Figure S4 a,b):** The heatmap has been generated based on the log2 fold-change values showing differential expression of lncRNAs in rice genotypes (a) IR64 and (b) Pokkali exposed to SA at 0, 3, 6, 12, and 24 h.

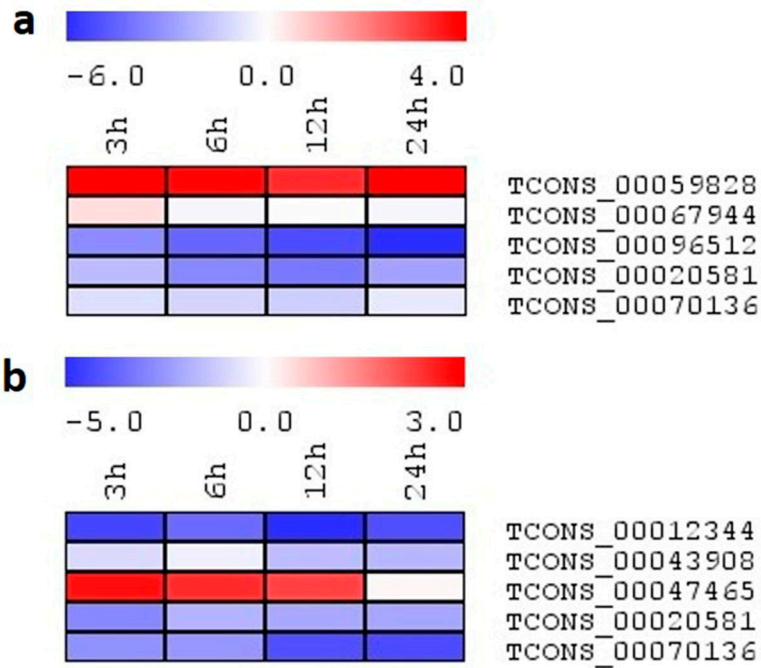

**Figure S5 (a,b):** The heatmap has been generated based on the log2 fold-change values showing differential expression of lncRNAs in rice genotypes (a) IR64 and (b) Pokkali exposed to JA at 0, 3, 6, 12, and 24 h.

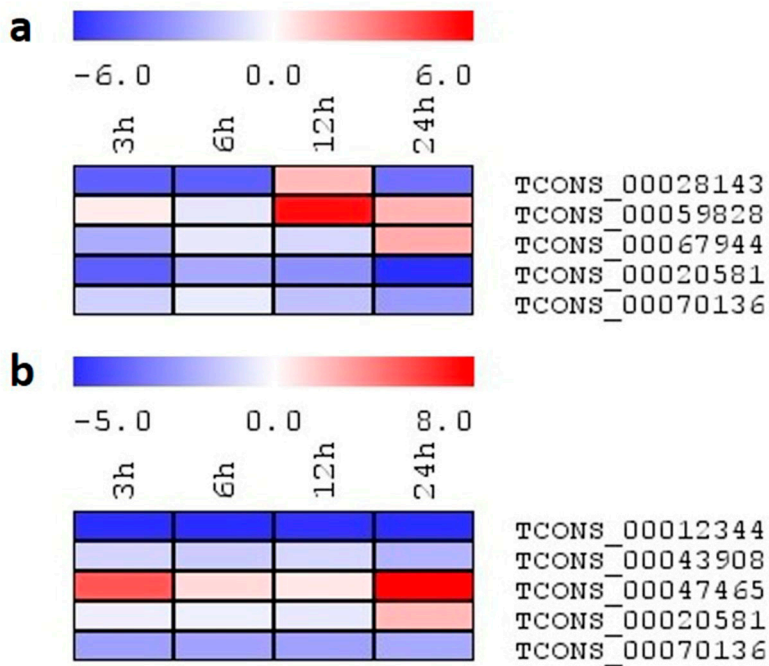

**Figure S6 (a,b):** The heatmap has been generated based on the log2 fold-change values showing differential expression of lncRNAs in rice genotypes (a) IR64 and (b) Pokkali exposed to ET at 0, 3, 6, 12, and 24 h.

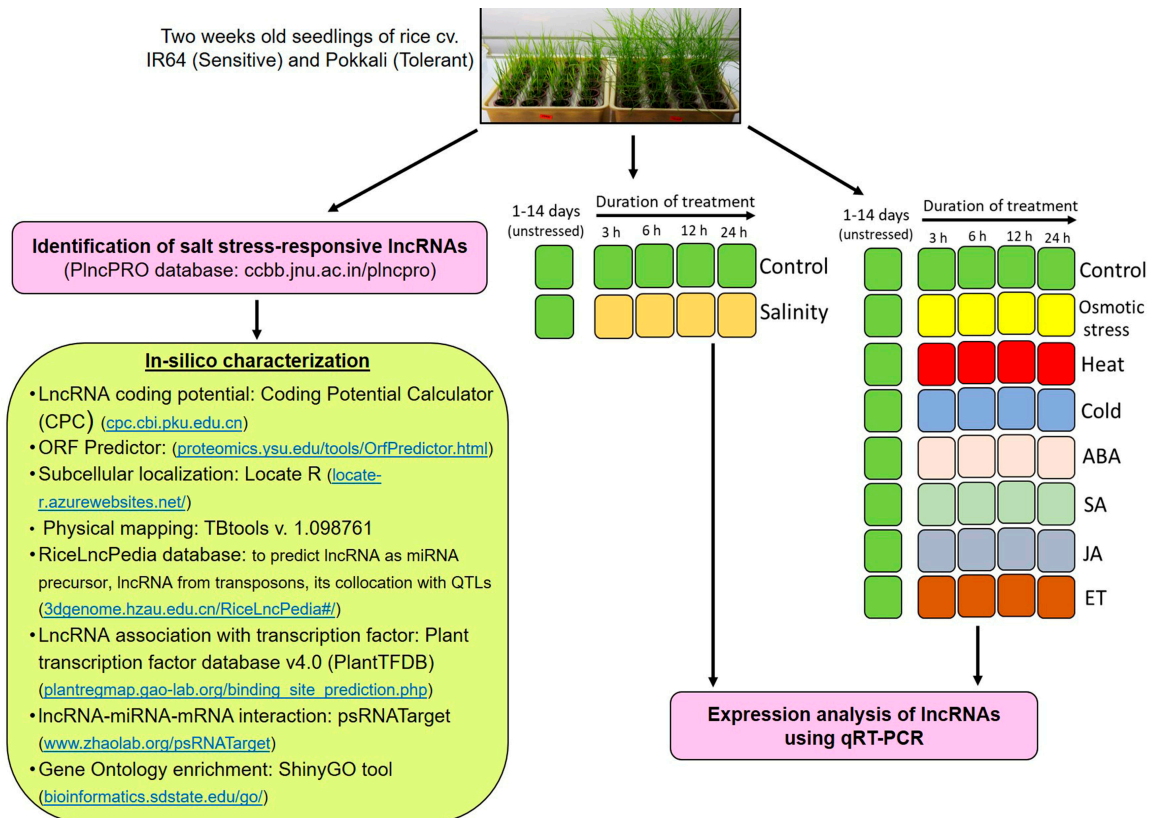

**Figure S7:** Schematic representation of the workflow and steps involved in the experiment.
