# Supplementary material for: Pokkali: A Naturally Evolved Salt-Tolerant Rice Shows a Distinguished Set of lncRNAs Possibly Contributing to the Tolerant Phenotype
Source: MDPI journal article supplement (doi:10.3390/ijms241411677), 2023-07-20
Supplement: s1 [file s1]

**Table S1:** List of the primers used in the study.

| Cultivar | LncRNA ID    | Oligos                 | References |
|----------|--------------|------------------------|------------|
| Pokkali  | T_00010836_F | CTGCGACATGTGCTTAGT     | This study |
|          | T_00010836_R | CCTGTTGTTCATGTCTAGGG   |            |
|          | T_00012344_F | TACTCCCTCAACCTCCATAG   | "          |
|          | T_00012344_R | GCAGGGTGAATAGTGTTAC    |            |
|          | T_00014021_F | GACACGACACATTGAGGTAG   | "          |
|          | T_00014021_R | CCTCATCGGCATCTTCTTAC   |            |
|          | T_00019521_F | CTCAACCTCCTCTCCATTTT   | "          |
|          | T_00019521_R | GCTCAATCAGCTCCAAGAA    |            |
|          | T_00020593_F | ATTCTCAATCGCTCCT       | "          |
|          | T_00020593_R | GACGAAGCTGCCATTAATTTG  |            |
|          | T_00035491_F | GAGGAACAGTACGTGCAATA   | "          |
|          | T_00035491_R | TCTGCTACTTCTCGGAGTTA   |            |
|          | T_00035493_F | CCACATCAGACAGGTTTCTAG  | "          |
|          | T_00035493_R | GCAATGCAACTGCTCATC     |            |
|          | T_00038079_F | GTGACCTGCTGATTGATGTT   | "          |
|          | T_00038079_R | TCACCATGGCCTTCATTTG    |            |
|          | T_00043908_F | ATCGTGTGCTCAATGGATAG   | "          |
|          | T_00043908_R | GGGCGTATGAGAAAGAAGAG   |            |
|          | T_00047465_F | TCACAACCTCTCGGTACAA    | "          |
|          | T_00047465_R | TTCGCTTAGCCATGCTTAC    |            |
|          | T_00070178_F | TTTGAGAGTGGTCTGGTTTG   | "          |
|          | T_00070178_R | GGTAGTAGGCTCACATCAAAG  |            |
|          | T_00079037_F | GGGTGTCCAGAGAAATGTTG   | "          |
|          | T_00079037_R | TGTCAGTGTTTATGGATTGG   |            |
|          | T_00087936_F | CCAACCTTGACTATCCGTCT   | "          |
|          | T_00087936_R | CGTTTGACCGTCCGTCTT     |            |
|          | T_00088033_F | TGGAAAGTACCCGACTAGAG   | "          |
|          | T_00088033_R | GGCTGTCTATGCCTTGTTT    |            |
|          | T_00104482_F | AGGCAGGTTGAAGGAGAT     | "          |
|          | T_00104482_R | ACACGCTTGTGCTTTGT      |            |
|          | T_00103084_F | TACATCGTCCGGCTCAA      | "          |
|          | T_00103084_R | CATCTCGGTGCAAGCAA      |            |
| IR64     | T_00002159_F | GACAAGTAACCTGCCAGATAG  | "          |
|          | T_00002159_R | GTTCCCTGAATCTGCTTGT    |            |
|          | T_00003058_F | TTCCTCTTCTCTCCCTATC    | "          |
|          | T_00003058_R | CTGTAGCTCACCGATGATTC   |            |
|          | T_00013994_F | AACAGCCAAAGAATAAGCCA   | "          |
|          | T_00013994_R | GTAGATTTGTTCGTAGCGACTT |            |
|          | T_00028143_F | GCTGAGTCGCTGATGATATG   | "          |
|          | T_00028143_R | CCACACCAGCCAAGAAAT     |            |

|                          |              |                        |      |
|--------------------------|--------------|------------------------|------|
|                          | T_00035411_F | GCAGGGAAAATGTGTGCT     | "    |
|                          | T_00035411_R | TGTTGAGCAAGAAGCTCACT   |      |
|                          | T_00035427_F | GCGTGGTAGGTACGAAATG    | "    |
|                          | T_00035427_R | CTCACTGCGCATATCTCTTT   |      |
|                          | T_00038200_F | ATAGCCATGTCTCCCTTCT    | "    |
|                          | T_00038200_R | CGGATGTGTATGGAGGAAAG   |      |
|                          | T_00059595_F | TTGGAGGAGGGAGAAAGAG    | "    |
|                          | T_00059595_R | CATCTACGCCTTCCATTCTG   |      |
|                          | T_00059828_F | TTCGGTTTGTAAAGACTTCTGG | "    |
|                          | T_00059828_R | CCCAACAATCAACCACAATAAC |      |
|                          | T_00061576_F | CATCTACCCAGCAGGAGATA   | "    |
|                          | T_00061576_R | TGGACAATTCAGGGACAAG    |      |
|                          | T_00067944_F | TCGTATCTTAGGTGGAGTTGA  | "    |
|                          | T_00067944_R | ATCTGCTGAGCTTGTTGTAG   |      |
|                          | T_00085253_F | CTCCAACCCAATCTCTAATC   | "    |
|                          | T_00085253_R | CGACAACCTCCCTGTCATC    |      |
|                          | T_00096512_F | GGTGATTCTACTCCTGAAG    | "    |
|                          | T_00096512_R | GTCAAATTATGCAAGGGTGAG  |      |
|                          | T_00096533_F | CAACTCACACGTCGAGATA    | "    |
|                          | T_00096533_R | GTCCACCAAAATTCATGTTC   |      |
|                          | T_00110813_F | CGTATTAGTTCATCGCGTAGG  | "    |
|                          | T_00110813_R | AGGGATGATTGCTTGATTGG   |      |
| Common in both cultivars | T_00020581_F | CGGTCGTA CTGATGTTCT    | "    |
|                          | T_00020581_R | GGAACAGTACGGAAGAAATGG  |      |
|                          | T_00068689_F | CCCAGCAAGGTCAAATGT     | "    |
|                          | T_00068689_R | GGAGGTGCGAGGGAATAGTAA  |      |
|                          | T_00046718_F | GCCGCGAGGATTAATTGAAG   | "    |
|                          | T_00046718_R | CACAAACCAAACCAACCCA    |      |
|                          | T_00070136_F | GTTGCTGATCCATTAGGTAGAC | "    |
|                          | T_00070136_R | CAACGTGTCTGCATCCTATT   |      |
| Reference gene           | Rice_UBQ5_F  | ACCACTTCGACCGCCACTACT  | [40] |
|                          | Rice_UBQ5_R  | ACGCCTAAGCCTGCTGGTT    |      |
