# Supplementary material for: Pokkali: A Naturally Evolved Salt-Tolerant Rice Shows a Distinguished Set of lncRNAs Possibly Contributing to the Tolerant Phenotype
Source: Int J Mol Sci. 2023 Jul 20;24(14):11677. doi: 10.3390/ijms241411677 (PMC10380863; doi:10.3390/ijms241411677)
Supplement: Supplementary file 1 [file ijms-24-11677-s001.zip]

Archive with 8 entries (8 files):
- Figures S1-S7.pdf
- Table S1.pdf
- Table S2.xlsx
- Table S3.xlsx
- Table S4.xlsx
- Table S5.xlsx
- Table S6.xlsx
- Table S7.xlsx
