# Supplementary material for: Pokkali: A Naturally Evolved Salt-Tolerant Rice Shows a Distinguished Set of lncRNAs Possibly Contributing to the Tolerant Phenotype
Source: Int J Mol Sci. 2023 Jul 20;24(14):11677. doi: 10.3390/ijms241411677 (PMC10380863; doi:10.3390/ijms241411677)
Supplement: Supplementary file 1 [file ijms-24-11677-s001.zip › Table S2.xlsx]

## Sheet: IR64
Table S2: Details of the RNA-seq data of lncRNAs for both the contrasting genotypes. The lncRNAs shared between the genotypes are highlighted with red text.
				IR64-Ct Vs IR64-Ss			Coding potential
TCONs_ids	XLOC_Ids	Loc_Ids	Chr_pos	log2 fold change	P-value	Regulation	Coding/noncoding	coding potential score
TCONS_00001080	XLOC_000467	LOC_Os01g11600	Chr1:6257576-6259954	2.35765	0.0012	Up	coding (weak)	0.0420914
TCONS_00002911	XLOC_001451	XLOC_001451	Chr1:19102351-19106339	3.02382	0.00195	Up	coding (weak)	0.237179
TCONS_00005224	XLOC_002582	LOC_Os01g58310	Chr1:33698762-33700538	3.35143	0.00335	Up	coding	1.13344
TCONS_00020581	XLOC_010356	XLOC_010356	Chr10:7889127-7889454	3.57204	0.0251	Up	noncoding	-1.31437
TCONS_00046718	XLOC_024018	LOC_Os02g53410	Chr2:32686076-32686828	2.16128	0.00385	Up	coding	1.09783
TCONS_00068689	XLOC_034986	XLOC_034986	Chr4:29053703-29055784	3.3203	0.0224	Up	coding (weak)	0.188051
TCONS_00068976	XLOC_035128	LOC_Os04g51680	Chr4:30615073-30616354	2.14756	0.0049	Up	coding (weak)	0.213272
TCONS_00069419	XLOC_035287	XLOC_035287	Chr4:32619449-32620102	-1.4295	0.0429	Down	noncoding	-1.16399
TCONS_00070136	XLOC_035632	XLOC_035632	Chr4:22047972-22048337	9.72885	0.02485	Up	noncoding	-1.50908
TCONS_00070200	XLOC_035696	XLOC_035696	Chr4:32623648-32624242	-8.5784	0.0278	Down	noncoding (weak)	-0.923153
TCONS_00080053	XLOC_040912	XLOC_040912	Chr6:5489584-5490137	3.38804	0.0436	Up	noncoding	-1.38687
TCONS_00084929	XLOC_043574	XLOC_043574	Chr6:9895639-9901000	2.26018	0.01525	Up	coding (weak)	0.24651
TCONS_00088393	XLOC_045515	XLOC_045515	Chr7:2175101-2177745	-3.38491	0.0203	Down	coding (weak)	0.0389455
TCONS_00093771	XLOC_048354	XLOC_048354	Chr7:9537201-9541906	2.20313	0.01175	Up	coding (weak)	0.448308
TCONS_00094026	XLOC_048525	XLOC_048525	Chr7:11714271-11718337	8.96764	5e-05	Up	coding (weak)	0.498413
TCONS_00096504	XLOC_049807	XLOC_049807	Chr7:9482055-9482581	2.2957	0.0253	Up	noncoding	-1.50427
TCONS_00098405	XLOC_050893	XLOC_050893	Chr8:13481657-13484832	2.17332	0.03705	Up	coding (weak)	0.424769
TCONS_00002159	XLOC_001049	LOC_Os01g24764	Chr1:13934494-13935952	8.65051	0.00475	Up	noncoding	-1.07301
TCONS_00003058	XLOC_001530	XLOC_001530	Chr1:20197290-20199992	9.97778	5e-05	Up	noncoding	-1.14038
TCONS_00013955	XLOC_006563	XLOC_006563	Chr1:1138185-1138415	-12.0445	0.0114	Down	noncoding	-1.28265
TCONS_00013956	XLOC_006564	XLOC_006564	Chr1:1635803-1636275	8.78862	0.0387	Up	noncoding	-1.17228
TCONS_00013994	XLOC_006602	XLOC_006602	Chr1:10170642-10170852	9.41542	0.03	Up	noncoding	-1.15662
TCONS_00014114	XLOC_006722	XLOC_006722	Chr1:32496805-32497331	8.55469	0.0387	Up	noncoding	-1.36605
TCONS_00023562	XLOC_012049	XLOC_012049	Chr11:23140917-23145640	2.42572	0.02295	Up	coding (weak)	0.192555
TCONS_00027834	XLOC_014436	LOC_Os11g43895	Chr11:26505322-26507776	9.42302	0.0045	Up	noncoding	-1.05262
TCONS_00028143	XLOC_014608	XLOC_014608	Chr11:2012335-2012869	8.8442	0.02485	Up	noncoding (weak)	-0.944265
TCONS_00035411	XLOC_018761	XLOC_018761	Chr12:3907421-3907776	10.4803	0.0085	Up	noncoding (weak)	-0.988207
TCONS_00035427	XLOC_018777	XLOC_018777	Chr12:7125608-7125834	11.0494	0.0387	Up	noncoding	-1.50352
TCONS_00037888	XLOC_020026	XLOC_020026	Chr2:15206969-15207612	-9.50179	0.04365	Down	noncoding	-1.11269
TCONS_00038200	XLOC_020194	XLOC_020194	Chr2:17271085-17335614	4.0641	0.0063	Up	coding (weak)	0.538309
TCONS_00047403	XLOC_024306	XLOC_024306	Chr2:7982027-7982415	9.25029	0.0387	Up	noncoding	-1.38194
TCONS_00047482	XLOC_024385	XLOC_024385	Chr2:24559570-24559808	-8.88591	0.0394	Down	noncoding	-1.39156
TCONS_00047502	XLOC_024405	XLOC_024405	Chr2:27741050-27741470	-10.0273	0.0114	Down	noncoding	-1.29663
TCONS_00058822	XLOC_029640	XLOC_029640	Chr3:31998163-32000283	-10.5032	0.04105	Down	noncoding	-1.19349
TCONS_00059595	XLOC_029970	LOC_Os03g62920	Chr3:35599959-35601153	8.70282	0.00805	Up	noncoding	-1.10889
TCONS_00059752	XLOC_030042	XLOC_030042	Chr3:2971490-2971996	9.22072	0.0171	Up	noncoding	-1.21194
TCONS_00059824	XLOC_030114	XLOC_030114	Chr3:13708475-13708780	-10.5131	0.019	Down	noncoding	-1.47515
TCONS_00059828	XLOC_030118	XLOC_030118	Chr3:15161351-15162078	10.4353	0.0002	Up	noncoding (weak)	-0.154123
TCONS_00060891	XLOC_030829	LOC_Os04g16830	Chr4:9093546-9210338	-10.5505	0.00895	Down	coding (weak)	0.403202
TCONS_00061576	XLOC_031311	LOC_Os04g26590	Chr4:15515196-15518592	8.99143	0.0068	Up	noncoding	-1.15202
TCONS_00065402	XLOC_033277	LOC_Os04g10924	Chr4:5920296-5925021	-1.49874	0.0399	Down	coding	2.56503
TCONS_00067944	XLOC_034673	XLOC_034673	Chr4:24981264-24981638	10.075	0.02485	Up	noncoding	-1.35428
TCONS_00070062	XLOC_035558	XLOC_035558	Chr4:4644201-4644864	3.46659	0.015	Up	noncoding (weak)	-0.815219
TCONS_00070084	XLOC_035580	XLOC_035580	Chr4:10976288-10977963	3.41434	0.0258	Up	coding (weak)	0.284305
TCONS_00071911	XLOC_036674	XLOC_036674	Chr5:13232896-13234730	9.36364	5e-05	Up	coding (weak)	0.496922
TCONS_00077477	XLOC_039631	LOC_Os05g37060	Chr5:21652369-21655652	2.96335	0.0394	Up	coding	1.45237
TCONS_00078977	XLOC_040359	XLOC_040359	Chr5:11216994-11217778	-9.52262	0.0038	Down	coding (weak)	0.0669689
TCONS_00078979	XLOC_040361	XLOC_040361	Chr5:12259917-12260663	9.32429	0.0054	Up	noncoding	-1.26341
TCONS_00085253	XLOC_043772	LOC_Os06g21620	Chr6:12471652-12476482	9.39818	0.0384	Up	coding (weak)	0.967317
TCONS_00091114	XLOC_047008	LOC_Os07g37280	Chr7:22339614-22341401	2.24429	0.0362	Up	coding (weak)	0.672388
TCONS_00096512	XLOC_049815	XLOC_049815	Chr7:12460295-12460565	11.1321	0.0134	Up	noncoding (weak)	-0.0786661
TCONS_00096533	XLOC_049836	XLOC_049836	Chr7:20199931-20200155	9.09306	0.03	Up	noncoding	-1.14774
TCONS_00096554	XLOC_049857	XLOC_049857	Chr7:23994733-23995332	-8.56133	0.0278	Down	noncoding	-1.27567
TCONS_00099726	XLOC_051638	XLOC_051638	Chr8:23886976-23888276	-9.45817	0.0278	Down	noncoding	-1.28197
TCONS_00102955	XLOC_053362	XLOC_053362	Chr8:18275118-18280444	1.88864	0.0077	Up	coding (weak)	0.408498
TCONS_00104431	XLOC_054165	XLOC_054165	Chr8:10278089-10278659	3.66324	0.03855	Up	noncoding	-1.13092
TCONS_00104463	XLOC_054197	XLOC_054197	Chr8:19274398-19274624	9.05144	0.03	Up	noncoding (weak)	-0.496623
TCONS_00104473	XLOC_054207	XLOC_054207	Chr8:22098534-22099453	2.96469	0.0475	Up	noncoding	-1.47726
TCONS_00110813	XLOC_057683	XLOC_057683	Chr9:10749197-10749600	11.4762	0.00025	Up	noncoding	-1.07201
TCONS_00110847	XLOC_057717	XLOC_057717	Chr9:17653792-17654296	-9.41086	0.0162	Down	noncoding	-1.08503
TCONS_00110865	XLOC_057735	XLOC_057735	Chr9:22254986-22255227	10.7654	0.0387	Up	noncoding	-1.48935
TCONS_00111006	XLOC_057831	XLOC_057831	ChrSy:541842-542150	10.4735	0.0171	Up	noncoding (weak)	-0.187769
TCONS_00111133	XLOC_057928	XLOC_057928	ChrUn:616542-616950	9.9695	0.02485	Up	noncoding	-1.16337

## Sheet: Pokkali
				Pokkali-Ct Vs Pokkali-Ss			Coding potential
TCONs_ids	XLOC_Ids	Loc_Ids	Chr_pos	log2 fold change	P-value	Regulation	Coding/noncoding	coding potential score
TCONS_00001080	XLOC_000467	LOC_Os01g11600	Chr1:6257576-6259954	2.75121	0.00025	Up	coding (weak)	0.0420914
TCONS_00002911	XLOC_001451	XLOC_001451	Chr1:19102351-19106339	3.1398	0.00435	Up	coding (weak)	0.237179
TCONS_00005224	XLOC_002582	LOC_Os01g58310	Chr1:33698762-33700538	3.22112	0.00135	Up	coding	1.13344
TCONS_00020581	XLOC_010356	XLOC_010356	Chr10:7889127-7889454	11.3888	0.0044	Up	noncoding	-1.31437
TCONS_00046718	XLOC_024018	LOC_Os02g53410	Chr2:32686076-32686828	1.91845	0.01995	Up	coding	1.09783
TCONS_00068689	XLOC_034986	XLOC_034986	Chr4:29053703-29055784	2.82187	0.0158	Up	coding (weak)	0.188051
TCONS_00068976	XLOC_035128	LOC_Os04g51680	Chr4:30615073-30616354	2.2282	0.00405	Up	coding (weak)	0.213272
TCONS_00069419	XLOC_035287	XLOC_035287	Chr4:32619449-32620102	-1.69324	0.02065	Down	noncoding	-1.16399
TCONS_00070136	XLOC_035632	XLOC_035632	Chr4:22047972-22048337	9.71321	0.0247	Up	noncoding	-1.50908
TCONS_00070200	XLOC_035696	XLOC_035696	Chr4:32623648-32624242	-9.6809	0.0063	Down	noncoding (weak)	-0.923153
TCONS_00080053	XLOC_040912	XLOC_040912	Chr6:5489584-5490137	3.19203	0.028	Up	noncoding	-1.38687
TCONS_00084929	XLOC_043574	XLOC_043574	Chr6:9895639-9901000	3.51815	0.0267	Up	coding (weak)	0.24651
TCONS_00088393	XLOC_045515	XLOC_045515	Chr7:2175101-2177745	-1.73031	0.0372	Down	coding (weak)	0.0389455
TCONS_00093771	XLOC_048354	XLOC_048354	Chr7:9537201-9541906	3.23798	0.0081	Up	coding (weak)	0.448308
TCONS_00094026	XLOC_048525	XLOC_048525	Chr7:11714271-11718337	1.72864	0.0106	Up	coding (weak)	0.493467
TCONS_00096504	XLOC_049807	XLOC_049807	Chr7:9482055-9482581	3.61071	0.02365	Up	noncoding	-1.50427
TCONS_00098405	XLOC_050893	XLOC_050893	Chr8:13481657-13484832	3.64066	0.0131	Up	coding (weak)	0.412147
TCONS_00010836	XLOC_005292	LOC_Os01g46440	Chr1:26419883-26423740	3.41072	0.00885	Up	coding	1.48416
TCONS_00012344	XLOC_005930	XLOC_005930	Chr1:35201621-35205671	5.79359	0.0044	Up	coding (weak)	0.0547667
TCONS_00012580	XLOC_006019	XLOC_006019	Chr1:36307135-36311081	2.99297	0.00255	Up	coding (weak)	0.131603
TCONS_00013984	XLOC_006592	XLOC_006592	Chr1:8557342-8557653	9.83555	0.03875	Up	noncoding (weak)	-0.488781
TCONS_00014015	XLOC_006623	XLOC_006623	Chr1:12940430-12940679	8.59354	0.02405	Up	noncoding	-1.27947
TCONS_00014021	XLOC_006629	XLOC_006629	Chr1:15441526-15442240	8.75567	0.0121	Up	noncoding	-1.25976
TCONS_00014044	XLOC_006652	XLOC_006652	Chr1:20505252-20505694	8.92835	0.03875	Up	coding	1.07765
TCONS_00019521	XLOC_009885	LOC_Os10g33190	Chr10:17389720-17393970	8.78738	0.01035	Up	coding	1.4986
TCONS_00020593	XLOC_010368	XLOC_010368	Chr10:14454550-14454844	12.0072	0.00075	Up	noncoding	-1.12039
TCONS_00021583	XLOC_010847	LOC_Os11g10320	Chr11:5605242-5607269	-1.51797	0.04235	Down	coding (weak)	0.762499
TCONS_00025021	XLOC_012784	XLOC_012784	Chr11:3122967-3123763	10.6202	0.0003	Up	noncoding	-1.38914
TCONS_00027219	XLOC_014043	LOC_Os11g35350	Chr11:20723803-20724619	-2.81748	0.0418	Down	coding	3.06496
TCONS_00027548	XLOC_014252	XLOC_014252	Chr11:23796128-23796770	-9.79725	0.0061	Down	noncoding	-1.35167
TCONS_00028183	XLOC_014648	XLOC_014648	Chr11:8031643-8031847	-9.5218	0.03695	Down	noncoding	-1.43943
TCONS_00028201	XLOC_014666	XLOC_014666	Chr11:15234952-15235578	-8.92568	0.0165	Down	noncoding (weak)	-0.879758
TCONS_00028214	XLOC_014679	XLOC_014679	Chr11:19414377-19414924	-9.71176	0.007	Down	noncoding	-1.22439
TCONS_00035405	XLOC_018755	XLOC_018755	Chr12:2624902-2625650	9.56101	0.0044	Up	noncoding	-1.23804
TCONS_00035434	XLOC_018784	XLOC_018784	Chr12:8402969-8403177	9.40613	0.02405	Up	noncoding	-1.12898
TCONS_00035476	XLOC_018826	XLOC_018826	Chr12:17565452-17565879	-9.93755	0.01085	Down	noncoding	-1.25683
TCONS_00035491	XLOC_018841	XLOC_018841	Chr12:20902926-20903325	10.4891	0.00705	Up	noncoding	-1.43144
TCONS_00035493	XLOC_018843	XLOC_018843	Chr12:22584458-22585070	9.56384	0.00705	Up	noncoding	-1.14247
TCONS_00035503	XLOC_018853	XLOC_018853	Chr12:24462348-24462888	10.1935	0.0044	Up	noncoding	-1.21286
TCONS_00038079	XLOC_020111	XLOC_020111	Chr2:16336810-16337392	8.74958	0.02405	Up	noncoding (weak)	-0.172967
TCONS_00043908	XLOC_022714	LOC_Os02g26380	Chr2:15489942-15493874	2.32339	0.02835	Up	coding	1.72136
TCONS_00047459	XLOC_024362	XLOC_024362	Chr2:20114866-20115079	-9.28612	0.03695	Down	noncoding	-1.24719
TCONS_00047465	XLOC_024368	XLOC_024368	Chr2:21645755-21646316	9.22352	0.0121	Up	noncoding	-1.42812
TCONS_00048089	XLOC_024683	LOC_Os03g05220	Chr3:2530745-2533867	-9.80955	0.0201	Down	coding	2.135
TCONS_00059755	XLOC_030045	XLOC_030045	Chr3:4007979-4008588	9.83621	0.0046	Up	noncoding	-1.15724
TCONS_00059773	XLOC_030063	XLOC_030063	Chr3:5692888-5693275	-10.8782	0.0044	Down	noncoding	-1.06058
TCONS_00059785	XLOC_030075	XLOC_030075	Chr3:8933071-8933747	9.37207	0.00705	Up	noncoding	-1.51276
TCONS_00059841	XLOC_030131	XLOC_030131	Chr3:19125510-19125753	8.69038	0.02405	Up	noncoding	-1.13513
TCONS_00059842	XLOC_030132	XLOC_030132	Chr3:19213878-19215897	10.5167	5e-05	Up	noncoding (weak)	-0.106442
TCONS_00059900	XLOC_030190	XLOC_030190	Chr3:33794195-33794624	8.58279	0.0492	Up	noncoding	-1.44545
TCONS_00059903	XLOC_030193	XLOC_030193	Chr3:33883429-33883751	9.31916	0.0492	Up	noncoding	-1.41772
TCONS_00060546	XLOC_030606	LOC_Os04g11030	Chr4:5986671-5987382	-3.69194	0.0194	Down	coding	2.15509
TCONS_00065403	XLOC_033278	LOC_Os04g10940	Chr4:5931173-5931871	-1.63539	0.0377	Down	coding (weak)	0.738082
TCONS_00067186	XLOC_034366	XLOC_034366	Chr4:21137276-21139660	5.70462	0.0028	Up	noncoding	-1.25264
TCONS_00070133	XLOC_035629	XLOC_035629	Chr4:21743647-21744777	8.83767	0.0044	Up	noncoding	-1.1803
TCONS_00070178	XLOC_035674	XLOC_035674	Chr4:27343915-27344380	8.81456	0.03875	Up	noncoding	-1.1773
TCONS_00070198	XLOC_035694	XLOC_035694	Chr4:31807275-31808022	-1.49559	0.0461	Down	noncoding	-1.1434
TCONS_00070201	XLOC_035697	XLOC_035697	Chr4:32624667-32624956	-11.4792	0.0063	Down	noncoding	-1.37576
TCONS_00074053	XLOC_037804	LOC_Os05g47730	Chr5:27345453-27357619	3.00832	0.04565	Up	coding (weak)	0.254351
TCONS_00074417	XLOC_037957	LOC_Os05g50815	Chr5:29146444-29149543	8.85739	0.0419	Up	coding	2.3412
TCONS_00076259	XLOC_038992	LOC_Os05g22930	Chr5:13056934-13078101	10.5926	0.04365	Up	coding	1.15422
TCONS_00078951	XLOC_040333	XLOC_040333	Chr5:5230430-5231329	-4.27684	0.04835	Down	noncoding	-1.29508
TCONS_00078963	XLOC_040345	XLOC_040345	Chr5:6780700-6781136	8.54551	0.0492	Up	noncoding	-1.45384
TCONS_00079037	XLOC_040419	XLOC_040419	Chr5:26340183-26341001	8.86875	0.00755	Up	noncoding	-1.05995
TCONS_00083178	XLOC_042735	XLOC_042735	Chr6:30563598-30564007	-10.5059	0.0009	Down	noncoding	-1.11479
TCONS_00085814	XLOC_044119	LOC_Os06g29730	Chr6:17066918-17068618	-2.00408	0.00655	Down	coding	2.04971
TCONS_00086481	XLOC_044558	XLOC_044558	Chr6:22846202-22847113	-4.48625	0.0475	Down	noncoding	-1.10834
TCONS_00087929	XLOC_045202	XLOC_045202	Chr6:2352077-2352416	9.17437	0.0492	Up	noncoding	-1.40841
TCONS_00087936	XLOC_045209	XLOC_045209	Chr6:4406895-4407097	11.8849	0.0247	Up	noncoding	-1.16229
TCONS_00088033	XLOC_045306	XLOC_045306	Chr6:25431968-25432958	8.68501	0.00705	Up	noncoding (weak)	-0.0524771
TCONS_00088047	XLOC_045320	XLOC_045320	Chr6:28486734-28487038	9.90424	0.03875	Up	noncoding	-1.29692
TCONS_00088604	XLOC_045627	LOC_Os07g07280	Chr7:3616036-3618205	-10.2601	0.04935	Down	coding (weak)	0.388412
TCONS_00091234	XLOC_047073	XLOC_047073	Chr7:23184013-23184924	-4.01706	0.0489	Down	noncoding	-1.25733
TCONS_00096479	XLOC_049782	XLOC_049782	Chr7:281961-283340	8.61471	0.0007	Up	noncoding	-1.46163
TCONS_00096548	XLOC_049851	XLOC_049851	Chr7:22722558-22723782	9.64596	0.0001	Up	noncoding	-1.37986
TCONS_00099091	XLOC_051299	LOC_Os08g30980	Chr8:19124339-19127813	-9.4757	0.0262	Down	coding	5.0836
TCONS_00103084	XLOC_053468	LOC_Os08g31950	Chr8:19813646-19814816	3.51414	0.0448	Up	coding (weak)	0.170057
TCONS_00104478	XLOC_054212	XLOC_054212	Chr8:23890991-23891747	9.3008	0.0052	Up	noncoding	-1.02488
TCONS_00104482	XLOC_054216	XLOC_054216	Chr8:24795337-24796406	1.81067	0.0361	Up	noncoding	-1.07032
TCONS_00110829	XLOC_057699	XLOC_057699	Chr9:15064864-15065278	10.6634	0.0046	Up	noncoding	-1.20371
TCONS_00111007	XLOC_057832	XLOC_057832	ChrSy:542208-542763	10.6844	0.00035	Up	coding (weak)	0.473258
