# Supplementary material for: Pokkali: A Naturally Evolved Salt-Tolerant Rice Shows a Distinguished Set of lncRNAs Possibly Contributing to the Tolerant Phenotype
Source: Int J Mol Sci. 2023 Jul 20;24(14):11677. doi: 10.3390/ijms241411677 (PMC10380863; doi:10.3390/ijms241411677)
Supplement: Supplementary file 1 [file ijms-24-11677-s001.zip › Table S3.xlsx]

## Sheet: IR64
Table S3: LncRNAs obtained after blast searched against RiceLncPedia database.
									small RNA target		QTL
Transcript ID	Locus ID	RiceLncPedia ID	Strand	classification	exon no.	GC (%)	Transposons	Pre-miRNA	miRNA ID	Inhibition	QTL gene	character major	character minor
TCONS_00003058	XLOC_001530	Osa01LNT0022800.1	+	sense lncRNA	2	39.1			osa-miR5811	Translation	nan	Physiological trait	Eating quality
									osa-miR7694-5p	Cleavage	amy6-1	Physiological trait	Eating quality
									osa-miR156c-3p	Cleavage	tgw6.1	Physiological trait	Source activity
									osa-miR156f-3p	Cleavage	ph6	Morphological trait	Dwarf
									osa-miR156g-3p	Cleavage	qLDLJ-6-1,2,3	Physiological trait	Source activity
									osa-miR156h-3p	Cleavage	gw6	Morphological trait	Panicle/flower
									osa-miR156l-3p	Cleavage	RPLD4	Physiological trait	Eating quality
									osa-miR164e	Translation	asv6-1	Physiological trait	Eating quality
									osa-miR167h-3p	Cleavage
									osa-miR2919	Cleavage
TCONS_00023562	XLOC_012049	Osa06LNT0349100.1
TCONS_00027834	LOC_Os11g43895	Osa01LNT0019600.3	+	sense lncRNA	2	43.93			osa-miR319a-5p	Translation	nan	Resistance or Tolerance	Salinity tolerance
									osa-miR319a-5p	Translation	nan	Resistance or Tolerance	Salinity tolerance
									osa-miR1425-5p	Cleavage	brt1d	Resistance or Tolerance	Drought tolerance
									osa-miR1425-3p	Translation	rfw1b	Resistance or Tolerance	Drought tolerance
									osa-miR1442	Translation	nan	Resistance or Tolerance	Salinity tolerance
									osa-miR1850.2	Cleavage	qNVB-1-1	Morphological trait	Culm/leaf
									osa-miR1850.3	Cleavage	nan	Physiological trait	Source activity
									osa-miR1852	Cleavage	nan	Morphological trait	Root
									osa-miR1858a	Translation
									osa-miR1858b	Translation
TCONS_00037888	XLOC_020026	Osa03LNT0220000.1	­	sense lncRNA	5	49.18			osa-miR5789	Cleavage	nan	Morphological trait	Panicle/flower
									osa-miR5143b	Cleavage	ccf3b	Physiological trait	Source activity
									osa-miR5143b	Translation	ccfs3	Physiological trait	Source activity
									osa-miR7692-5p	Cleavage	nan	Resistance or Tolerance	Other stress resistance
									osa-miR529a	Cleavage	nan	Resistance or Tolerance	Other stress resistance
									osa-miR2097-3p	Cleavage	An5(t)	Morphological trait	Panicle/flower
									osa-miR2930	Cleavage	gw3.1	Morphological trait	Seed
									osa-miR5143a	Cleavage	qLWR-3	Morphological trait	Seed
									osa-miR5143a	Translation	qDLR3	Resistance or Tolerance	Other soil stress tolerance
									osa-miR529a	Cleavage	qGL3-1	Physiological trait	Eating quality
TCONS_00038200	XLOC_020194	Osa06LNT0349100.1
TCONS_00047502	XLOC_024405	Osa05LNT0292800.1	.	intergenetic lncRNA (lincRNA)	1	58.27	DTM_#DNAt_MULE_japo_Os0037		osa-miR1849	Translation	CORN5	Physiological trait	Source activity
									osa-miR2919	Cleavage	nan	Morphological trait	Root
											Ph5-1	Morphological trait	Dwarf
											nan	Resistance or Tolerance	Drought tolerance
TCONS_00059595	LOC_Os03g62920	Osa03LNT0244200.1	­	intergenetic lncRNA (lincRNA)	4	47.9			osa-miR1863b	Cleavage	spp3.1	Morphological trait	Panicle/flower
									osa-miR2275d	Cleavage	QFll3	Morphological trait	Culm/leaf
											Qbp1	Resistance or Tolerance	Insect resistance
											nan	Morphological trait	Panicle/flower
											QSn3	Morphological trait	Culm/leaf
											yld3.2	Morphological trait	Seed
TCONS_00059828	XLOC_030118	Osa02LNT0163400.1	­	long noncoding(lnc) isoforms of known genes	5	49.23			osa-miR5789	Cleavage	d50	Morphological trait	Dwarf
									osa-miR2096-5p	Cleavage	qPH-2	Morphological trait	Dwarf
									osa-miR5075	Cleavage	qSS-2	Physiological trait	Sterility
									osa-miR5491	Cleavage	np2.2	Morphological trait	Culm/leaf
									osa-miR5503	Cleavage	nan	Resistance or Tolerance	Drought tolerance
TCONS_00061576	LOC_Os04g26590	Osa04LNT0256800.1	+	intergenetic lncRNA (lincRNA)	4	46.94			osa-miR5821	Translation	gwt4a	Morphological trait	Seed
									osa-miR1858a	Translation	An8-glum	Morphological trait	Panicle/flower
									osa-miR1858a	Translation	spp4-2	Morphological trait	Panicle/flower
									osa-miR1858b	Translation	nan	Morphological trait	Panicle/flower
									osa-miR1858b	Translation	nan	Morphological trait	Root
									osa-miR1866-3p	Translation	nan	Morphological trait	Root
									osa-miR5149	Cleavage	qCCFJ-4	Physiological trait	Source activity
TCONS_00065402	LOC_Os04g10924	Osa04LNT0249900.1	­	intergenetic lncRNA (lincRNA)	2	39.24			osa-miR1849	Cleavage	qSNP-4a	Morphological trait	Panicle/flower
											spp4-2	Morphological trait	Panicle/flower
											qCTS4-1	Resistance or Tolerance	Cold tolerance
TCONS_00067944	XLOC_034673	Osa06LNT0335200.1	­	long noncoding(lnc) isoforms of known genes	24	49.4			osa-miR1437b-5p	Translation	sd6	Morphological trait	Seed
									osa-miR167a-5p	Translation	qLDLJ-6-1,2,3	Physiological trait	Source activity
									osa-miR167b	Translation	nan	Morphological trait	Panicle/flower
									osa-miR167c-5p	Translation	nan	Physiological trait	Source activity
									osa-miR396a-5p	Cleavage	spf6	Physiological trait	Sterility
									osa-miR396b-5p	Cleavage	asv6-1	Physiological trait	Eating quality
									osa-miR396c-5p	Cleavage	sd6	Morphological trait	Panicle/flower
									osa-miR169i-5p.2	Cleavage	S5	Physiological trait	Sterility
									osa-miR415	Translation	nan	Physiological trait	Eating quality
									osa-miR5526	Translation	nan	Physiological trait	Eating quality
TCONS_00070084	XLOC_035580	Osa06LNT0349100.1	­	intergenetic lncRNA (lincRNA)	2	43.92			osa-miR5811	Translation	ph6	Morphological trait	dwarf
									osa-miR7694-5p	Cleavage	amy6-1	Physiological trait	Eating quality
									osa-miR156c-3p	Cleavage	qLDLJ-6-1,2,3	Physiological trait	Source activity
									osa-miR156f-3p	Cleavage	gw6	Morphological trait	Panicle/flower
									osa-miR156g-3p	Cleavage	RPLD4	Physiological trait	Eating quality
									osa-miR156h-3p	Cleavage	nan	Physiological trait	Eating quality
									osa-miR156l-3p	Cleavage	asv6-1	Physiological trait	Eating quality
									osa-miR164e	Translation	tgw6.1	Physiological trait	Source activity
									osa-miR167h-3p	Cleavage
									osa-miR2919	Cleavage
TCONS_00071911	XLOC_036674	Osa03LNT0244200.1
TCONS_00078977	XLOC_040359	EL1473
TCONS_00096512	XLOC_049815	Osa11LNT0086200.1	­	long noncoding(lnc) isoforms of known genes	2	42.3			osa-miR5788	Translation	qDLR11	Resistance or Tolerance	Other soil stress tolerance
									osa-miR5337b	Cleavage	nan	Morphological trait	Panicle/flower
									osa-miR166h-5p	Translation
									osa-miR818a	Cleavage
									osa-miR818b	Cleavage
									osa-miR818c	Cleavage
									osa-miR818d	Cleavage
									osa-miR818e	Cleavage
									osa-miR1435	Cleavage
									osa-miR2092-5p	Translation
TCONS_00096533	XLOC_049836	Osa08LNT0558100.1	+	intergenetic lncRNA (lincRNA)	1	28.02	DTM_#DNAt_MULE_japo_Os0087		osa-miR2873a	Cleavage	qRGV-8	Physiological trait	Germination/dormancy
									osa-miR2873b	Cleavage	qPGWC8	Physiological trait	Eating quality
									osa-miR5153	Cleavage	nan	Physiological trait	Source activity
TCONS_00102955	XLOC_053362	Osa11LNT0086200.1
TCONS_00104463	XLOC_054197	Osa12LNT0139000.1	­	long noncoding(lnc) isoforms of known genes	24	45.5			osa-miR812s	Translation	qDRS12-1	Resistance or Tolerance	Drought tolerance
									osa-miR5799	Translation	qLEI 4	Resistance or Tolerance	Submergency tolerance
									osa-miR5799	Translation
									osa-miR5824	Cleavage
									osa-miR5512b	Translation
									osa-miR162a	Cleavage
									osa-miR395f	Cleavage
									osa-miR156l-5p	Cleavage
									osa-miR162b	Cleavage
									osa-miR812s	Translation
TCONS_00104473	XLOC_054207	Osa06LNT0349100.1
TCONS_00110813	XLOC_057683	Osa09LNT0434000.1	.	intergenetic lncRNA (lincRNA)	1	54.18			osa-miR1431	Cleavage	clr9	Resistance or Tolerance	Cold tolerance
									osa-miR5502	Cleavage	qAC9	Physiological trait	Eating quality
											nan	Resistance or Tolerance	Drought tolerance
											qPC9	Physiological trait	Eating quality
											apd9	Others	Others
											nan	Morphological trait	Root
											nan	Morphological trait	Shoot/Seedling
TCONS_00110865	XLOC_057735	Osa01LNT0032500.1	­	long noncoding(lnc) isoforms of known genes	10	43.53			osa-miR818f	Cleavage	nan	Morphological trait	Root
									osa-miR1861o	Cleavage	rfw1b	Resistance or Tolerance	Drought tolerance
									osa-miR171i-5p	Cleavage	nan	Physiological trait	Source activity
									osa-miR437	Translation	nan	Morphological trait	Seed
									osa-miR1428b	Translation	brt1d	Resistance or Tolerance	Drought tolerance
									osa-miR1428c	Translation	yld1.1	Physiological trait	Source activity
									osa-miR1428d	Translation	QPh1b	Resistance or Tolerance	Submergency tolerance
									osa-miR1428e-3p	Translation
									osa-miR1846a-3p	Translation
									osa-miR1846b-3p	Translation
TCONS_00111006	XLOC_057831	Osa06LNT0349100.1
TCONS_00111133	XLOC_057928	OsaAP008247LNT0452600.1
TCONS_00002911	XLOC_001451	Osa06LNT0349100.1
TCONS_00020581	XLOC_010356	Osa06LNT0349100.1
TCONS_00068689	XLOC_034986	Osa01LNT0019900.1	+	long noncoding(lnc) isoforms of known genes	4	54.62			osa-miR5542	Cleavage	qNVB-1-1	Morphological trait	Culm/leaf
									osa-miR5819	Cleavage	nan	Resistance or Tolerance	Salinity tolerance
									osa-miR1319b	Cleavage	nan	Resistance or Tolerance	Salinity tolerance
									osa-miR1425-5p	Cleavage	nan	Resistance or Tolerance	Salinity tolerance
									osa-miR2095-3p	Translation	rfw1b	Resistance or Tolerance	Drought tolerance
									osa-miR2095-3p	Translation	nan	Physiological trait	Source activity
									osa-miR5071	Cleavage	brt1d	Resistance or Tolerance	Drought tolerance
									osa-miR5524	Cleavage	nan	Morphological trait	Root
TCONS_00084929	XLOC_043574	Osa06LNT0349100.1
TCONS_00093771	XLOC_048354	Osa06LNT0349100.1
TCONS_00094026	XLOC_048525	Osa11LNT0086200.1
TCONS_00096504	XLOC_049807	Osa06LNT0349100.1
TCONS_00098405	XLOC_050893	Osa06LNT0349100.1

## Sheet: Pokkali
									small RNA target		QTL
Transcript ID	Locus ID	RiceLncPedia ID	Strand	classification	exon no.	GC (%)	Transposons	Pre-miRNA	miRNA ID	Inhibition	QTL gene	character major	character minor
TCONS_00010836	LOC_Os01g46440	Osa12LNT0139000.1	­	long noncoding(lnc) isoforms of known genes	24	45.5			osa-miR5795	Translation	gp1a	Morphological trait	Panicle/flower
									osa-miR812v	Translation	nan	Physiological trait	Source activity
									osa-miR166a-5p	Translation	qFLL-1	Morphological trait	Culm/leaf
									osa-miR166e-5p	Translation	qFLP-1	Morphological trait	Culm/leaf
									osa-miR3979-3p	Cleavage
									osa-miR2275c	Cleavage
									osa-miR2275c	Cleavage
TCONS_00012344	XLOC_005930	Osa11LNT0086200.1
TCONS_00012580	XLOC_006019	Osa06LNT0349100.1
TCONS_00019521	LOC_Os10g33190	Osa07LNT0383200.1	+	Intergenetic lncRNA (lincRNA)	3	46.14			osa-miR5489	Translation	Ph7a	Morphological trait	Dwarf
											QRl7	Morphological trait	Culm/leaf
											dth7.1	Physiological trait	Flowering
											nan	Resistance or Tolerance	Insect resistance
											qLTG-7	Resistance or Tolerance	Cold tolerance
											qLTG-7	Physiological trait	Germination/dormancy
											Ra7a	Others	Others
											qSDS-7-2	Physiological trait	Germination/dormancy
											sp2(t)	Morphological trait	Panicle/flower
TCONS_00035476	XLOC_018826	Osa12LNT0129000.1	­	Intergenetic lncRNA (lincRNA)	1	52.08			osa-miR172a	Translation	qtl12.1	Resistance or Tolerance	Drought tolerance
									osa-miR172b	Translation	qDLA-12-3	Resistance or Tolerance	Blast resistance
									osa-miR172c	Translation	nan	Morphological trait	Seed
									osa-miR172d-3p	Translation	qtl12.1	Resistance or Tolerance	Drought tolerance
											nan	Resistance or Tolerance	Other soil stress tolerance
TCONS_00035493	XLOC_018843	Osa01LNT0042900.1	.	Intergenetic lncRNA (lincRNA)	1	43.09			osa-miR438	Cleavage	nan	Physiological trait	Source activity
									osa-miR1436	Cleavage	Pi35(t)	Resistance or Tolerance	Blast resistance
									osa-miR1881	Cleavage	nan	Morphological trait	Root
									osa-miR2101-5p	Translation	rfw1b	Resistance or Tolerance	Drought tolerance
									osa-miR2118a	Translation	qLRC-1	Resistance or Tolerance	Drought tolerance
									osa-miR2118b	Translation	nan	Physiological trait	Source activity
									osa-miR2118c	Translation	nan	Resistance or Tolerance	Drought tolerance
									osa-miR2118d	Translation	An10	Morphological trait	Panicle/flower
									osa-miR2118e	Translation	qLEJ-1	Morphological trait	Shoot/Seedling
									osa-miR5831	Translation	brt1d	Resistance or Tolerance	Drought tolerance
TCONS_00043908	LOC_Os02g26380	Osa01LNT0023300.1	­	long noncoding(lnc) isoforms of known genes	6	47.64			osa-miR5542	Cleavage	nan	Resistance or Tolerance	Salinity tolerance
									osa-miR1437b-5p	Cleavage	qNVB-1-1	Morphological trait	Culm/leaf
									osa-miR396c-3p	Translation	brt1d	Resistance or Tolerance	Drought tolerance
									osa-miR167d-5p	Translation	rfw1b	Resistance or Tolerance	Drought tolerance
									osa-miR167e-5p	Translation	nan	Resistance or Tolerance	Salinity tolerance
									osa-miR167f	Translation	nan	Resistance or Tolerance	Salinity tolerance
									osa-miR167g	Translation	nan	Physiological trait	Source activity
									osa-miR167h-5p	Translation	nan	Morphological trait	Root
									osa-miR167i-5p	Translation
									osa-miR408-5p	Cleavage
TCONS_00047465	XLOC_024368	Osa09LNT0433700.1	+	Intergenetic lncRNA (lincRNA)	2	49.04			osa-miR395w	Cleavage	clr9	Resistance or Tolerance	Cold tolerance
									osa-miR1846d-3p	Translation	qAC9	Physiological trait	Eating quality
									osa-miR1871	Cleavage	nan	Morphological trait	Shoot/Seedling
									osa-miR1876	Translation	qPC9	Physiological trait	Eating quality
									osa-miR2919	Cleavage	apd9	Others	Others
									osa-miR5072	Cleavage	nan	Morphological trait	Root
											nan	Resistance or Tolerance	Drought tolerance
TCONS_00048089	LOC_Os03g05220	Osa05LNT0298100.2	+	long noncoding(lnc) isoforms of known genes	7	47.42			osa-miR5541	Cleavage	gnp5.1	Morphological trait	Panicle/flower
									osa-miR5544	Cleavage	QKw5	Morphological trait	Seed
									osa-miR5814	Cleavage	An7-glum	Morphological trait	Panicle/flower
									osa-miR5820	Translation	snp5.1	Morphological trait	Panicle/flower
									osa-miR159a.2	Cleavage
									osa-miR1852	Translation
									osa-miR2092-3p	Translation
									osa-miR2863b	Cleavage
									osa-miR5486	Cleavage
									osa-miR5517	Cleavage
TCONS_00059773	XLOC_030063	Osa03LNT0201000.1	­	Intergenetic lncRNA (lincRNA)	3	49.67			osa-miR5836	Translation	qTNL-3	Morphological trait	Culm/leaf
									osa-miR171e-5p	Cleavage	qTA3	Physiological trait	Eating quality
									osa-miR2106	Translation	Gy3a	Others	Others
											S34(t)	Physiological trait	Sterility
											qOE3-1	Physiological trait	Eating quality
TCONS_00059842	XLOC_030132	Osa06LNT0349100.1
TCONS_00070133	XLOC_035629	Osa07LNT0372100.1	­	long noncoding(lnc) isoforms of known genes	10	47.98			osa-miR5143b	Cleavage	gp7a	Morphological trait	Panicle/flower
									osa-miR156b-3p	Cleavage	tp7b	Morphological trait	Culm/leaf
									osa-miR395u	Cleavage	nan	Resistance or Tolerance	Insect resistance
									osa-miR1850.1	Cleavage	gw7	Morphological trait	Panicle/flower
									osa-miR5143a	Cleavage	yd7a	Morphological trait	Panicle/flower
											dth7.1	Physiological trait	Flowering
											qah7	Physiological trait	Flowering
											nan	Physiological trait	Flowering
											hwd2	Physiological trait	Lethality
											qHd-7	Physiological trait	Flowering
TCONS_00070178	XLOC_035674	Osa04LNT0254000.1	.	Intergenetic lncRNA (lincRNA)	1	44.7	DTM_#DNAt_MULE_japo_Os3282		osa-miR5526	Cleavage	gwt4a	Morphological trait	Seed
									osa-miR5538	Translation	qPEN-4	Morphological trait	Panicle/flower
									osa-miR5789	Translation	An8-glum	Morphological trait	Panicle/flower
									osa-miR5825	Translation	nan	Morphological trait	Root
									osa-miR416	Cleavage	qCER4-1	Morphological trait	Shoot/Seedling
									osa-miR1850.2	Cleavage	spp4-2	Morphological trait	Panicle/flower
									osa-miR2932	Translation	qCCFJ-4	Physiological trait	Source activity
									osa-miR5071	Cleavage	qSNP-4a	Morphological trait	Panicle/flower
									osa-miR5509	Translation
TCONS_00074417	LOC_Os05g50815	Osa05LNT0322200.1	­	long noncoding(lnc) isoforms of known genes	7	44.77			osa-miR5538	Translation	QFla5	Morphological trait	Culm/leaf
									osa-miR5793	Translation	QPl5	Morphological trait	Panicle/flower
									osa-miR1861o	Translation
									osa-miR1430	Cleavage
									osa-miR1861a	Translation
									osa-miR2098-3p	Cleavage
TCONS_00076259	LOC_Os05g22930	Osa05LNT0301500.1	­	long noncoding(lnc) isoforms of known genes	8	43.94			osa-miR415	Cleavage	QKw5	Morphological trait	Seed
									osa-miR1853-3p	Cleavage	qLTG-5	Resistance or Tolerance	Cold tolerance
									osa-miR1854-3p	Translation	yl(t)	Morphological trait	Shoot/Seedling
TCONS_00079037	XLOC_040419	Osa08LNT0413500.1	­	long noncoding(lnc) isoforms of known genes	2	58.06			osa-miR5825	Translation	qMRLw8	Resistance or Tolerance	Other soil stress tolerance
									osa-miR5831	Cleavage	nan	Resistance or Tolerance	Drought tolerance
									osa-miR319a-5p	Cleavage	nan	Physiological trait	Source activity
									osa-miR437	Translation	QalRr8.1	Resistance or Tolerance	Other stress resistance
									osa-miR2868	Cleavage	QalSr8.1	Resistance or Tolerance	Other stress resistance
									osa-miR5490	Cleavage	Aroma	Physiological trait	Eating quality
									osa-miR5493	Translation	dth8	Physiological trait	Flowering
									osa-miR5499	Translation
TCONS_00083178	XLOC_042735	Osa06LNT0361500.1	­	sense lncRNA	2	36.95			osa-miR5533	Cleavage	nan	Morphological trait	Root
									osa-miR5828	Translation	qREP-6	Resistance or Tolerance	Other soil stress tolerance
									osa-miR1861b	Cleavage
									osa-miR1861d	Cleavage
									osa-miR1861f	Cleavage
									osa-miR1861h	Cleavage
									osa-miR1861i	Cleavage
									osa-miR1861j	Cleavage
									osa-miR1861l	Cleavage
									osa-miR5486	Cleavage
TCONS_00086481	XLOC_044558	Osa06LNT0349700.1	.	Intergenetic lncRNA (lincRNA)	1	51.26			osa-miR1437b-5p	Cleavage	gw6	Morphological trait	Panicle/flower
									osa-miR1429-3p	Cleavage	ph6	Morphological trait	Dwarf
											RPLD4	Physiological trait	Eating quality
											nan	Physiological trait	Eating quality
											qLDLJ-6-1,2,3	Physiological trait	Source activity
											amy6-1	Physiological trait	Eating quality
											asv6-1	Physiological trait	Eating quality
											tgw6.1	Physiological trait	Source activity
TCONS_00087936	XLOC_045209	Osa06LNT0343100.2	­	long noncoding(lnc) isoforms of known genes	4	39.21		osa-MIR812b	osa-miR812s	Translation	qPHw6-2	Resistance or Tolerance	Other soil stress tolerance
									osa-miR5799	Translation	qSPN-6	Morphological trait	Panicle/flower
									osa-miR5831	Cleavage	qLDLJ-6-1,2,3	Physiological trait	Source activity
									osa-miR6251	Translation	gp6	Morphological trait	Panicle/flower
									osa-miR156j-3p	Cleavage	qPH2-6-1	Morphological trait	Dwarf
									osa-miR812a	Cleavage	qTN2-6-1	Morphological trait	Culm/leaf
									osa-miR812b	Cleavage	qSFWd6	Resistance or Tolerance	Other soil stress tolerance
									osa-miR812c	Cleavage	gw-6	Morphological trait	Seed
									osa-miR812d	Cleavage	ph6	Morphological trait	Dwarf
									osa-miR812p	Translation	qLVBTL6-1	Morphological trait	Panicle/flower
TCONS_00088033	XLOC_045306	Osa06LNT0343500.1	+	Intergenetic lncRNA (lincRNA)	3	51.89			osa-miR5837.2	Cleavage	qPHw6-2	Resistance or Tolerance	Other soil stress tolerance
									osa-miR171a	Cleavage	gw-6	Morphological trait	Seed
									osa-miR171b	Cleavage	ph6	Morphological trait	Dwarf
									osa-miR171c-3p	Cleavage	qLDLJ-6-1,2,3	Physiological trait	Source activity
									osa-miR171d-3p	Cleavage	gp6	Morphological trait	Panicle/flower
									osa-miR171e-3p	Cleavage	qRS6-1	Morphological trait	Shoot/Seedling
									osa-miR171f-3p	Cleavage	qLVBSL6-1	Morphological trait	Panicle/flower
									osa-miR171g	Cleavage	qSL6-1	Morphological trait	Culm/leaf
									osa-miR171g	Cleavage	nan	Physiological trait	Eating quality
									osa-miR171h	Cleavage	qHD-6-1	Physiological trait	Flowering
TCONS_00096479	XLOC_049782	Osa06LNT0349100.1
TCONS_00099091	LOC_Os08g30980	Osa10LNT0061800.1	­	long noncoding(lnc) isoforms of known genes	8	48.26			osa-miR818f	Translation	nan	Physiological trait	Sterility
									osa-miR398a	Cleavage	nan	Physiological trait	Sterility
									osa-miR1429-5p	Translation
									osa-miR1854-5p	Cleavage
									osa-miR1428b	Cleavage
									osa-miR1428c	Cleavage
									osa-miR1428d	Cleavage
									osa-miR1428e-3p	Cleavage
TCONS_00104482	XLOC_054216	Osa08LNT0419100.1	.	Intergenetic lncRNA (lincRNA)	1	47.68			osa-miR815a	Translation	nan	Resistance or Tolerance	Drought tolerance
									osa-miR815b	Translation	dth8	Physiological trait	Flowering
									osa-miR815c	Translation
									osa-miR1847.2	Cleavage
									osa-miR3979-5p	Translation
									osa-miR5073	Translation
TCONS_00111007	XLOC_057832	Osa06LNT0349100.1	­	Intergenetic lncRNA (lincRNA)	2	43.92			osa-miR5811	Translation	ph6	Morphological trait	Dwarf
									osa-miR7694-5p	Cleavage	nan	Physiological trait	Eating quality
									osa-miR156c-3p	Cleavage	amy6-1	Physiological trait	Eating quality
									osa-miR156f-3p	Cleavage	qLDLJ-6-1,2,3	Physiological trait	Source activity
									osa-miR156g-3p	Cleavage	gw6	Morphological trait	Panicle/flower
									osa-miR156h-3p	Cleavage	RPLD4	Physiological trait	Eating quality
									osa-miR156l-3p	Cleavage	asv6-1	Physiological trait	Eating quality
									osa-miR164e	Translation	tgw6.1	Physiological trait	Source activity
									osa-miR167h-3p	Cleavage
									osa-miR2919	Cleavage
TCONS_00002911	XLOC_001451	Osa06LNT0349100.1
TCONS_00020581	XLOC_010356	Osa06LNT0349100.1
TCONS_00068689	XLOC_034986	Osa01LNT0019900.1	+	long noncoding(lnc) isoforms of known genes	4	54.62			osa-miR5542	Cleavage	nan	Resistance or Tolerance	Salinity tolerance
									osa-miR5819	Cleavage	nan	Resistance or Tolerance	Salinity tolerance
									osa-miR1319b	Cleavage	qNVB-1-1	Morphological trait	Culm/leaf
									osa-miR1425-5p	Cleavage	rfw1b	Resistance or Tolerance	Drought tolerance
									osa-miR2095-3p	Translation	nan	Morphological trait	Root
									osa-miR2095-3p	Translation	brt1d	Resistance or Tolerance	Drought tolerance
									osa-miR5071	Cleavage	nan	Resistance or Tolerance	Salinity tolerance
									osa-miR5524	Cleavage	nan	Physiological trait	Source activity
TCONS_00084929	XLOC_043574	Osa06LNT0349100.1
TCONS_00093771	XLOC_048354	Osa06LNT0349100.1
TCONS_00094026	XLOC_048525	Osa11LNT0086200.1	­	long noncoding(lnc) isoforms of known genes	2	42.3			osa-miR5788	Translation	nan	Morphological trait	Panicle/flower
									osa-miR5337b	Cleavage	qDLR11	Resistance or Tolerance	Other soil stress tolerance
									osa-miR166h-5p	Translation
									osa-miR818a	Cleavage
									osa-miR818b	Cleavage
									osa-miR818c	Cleavage
									osa-miR818d	Cleavage
									osa-miR818e	Cleavage
									osa-miR1435	Cleavage
									osa-miR2092-5p	Translation
TCONS_00096504	XLOC_049807	Osa06LNT0349100.1
TCONS_00098405	XLOC_050893	Osa06LNT0349100.1
