# Supplementary material for: Pokkali: A Naturally Evolved Salt-Tolerant Rice Shows a Distinguished Set of lncRNAs Possibly Contributing to the Tolerant Phenotype
Source: Int J Mol Sci. 2023 Jul 20;24(14):11677. doi: 10.3390/ijms241411677 (PMC10380863; doi:10.3390/ijms241411677)
Supplement: Supplementary file 1 [file ijms-24-11677-s001.zip › Table S4.xlsx]

## Sheet: IR64
Table S4: LncRNAs length distribution and their subcellular localization. LncRNA shared by both genotypes are highlighted in red.																Table S4: LncRNAs length distribution and their subcellular localization. LncRNA shared by both genotypes are highlighted in red.																Table S4: LncRNAs length distribution and their subcellular localization. LncRNA shared by both genotypes are highlighted in red.																Table S4: LncRNAs length distribution and their subcellular localization. LncRNA shared by both genotypes are highlighted in red.
				Subcellular localization		Length
TCONs_ids	XLOC_Ids	Loc_Ids	Chr_pos	localization	Probability score	length (in bp)	Sequence
TCONS_00001080	XLOC_000467	LOC_Os01g11600	Chr1:6257576-6259954	cytoplasm	0.97	2262	TCGCACGGCAACTCCCACGACCGCCCGTTTGGCCCTAGCAACGGCTCGGATCTGCCCCTGGCGGATTATCTCAACCCCGGCCCCAAGTCTCCAACAACCGTTCTACACTTGGCGGCGGCAGAAGGGTGGGTCTGACGAGACGAGAGGCGTCGACTTCTCTCTCTCTGCCGGAAAGCGACTCCGCGAGACGCCGAGACAGCGTGGTGGTTTTCGTCGTCGTCGTCGTCGTCGGCTTCATATATCCCCTGGGATTCCGCTTCGGTTTCCACGCGCCAAAGCAAACGGGCAAAGGGAATTGAAGTAGCAGCAGCAGTGAATTGAAGTAAGAAGACAACGGGATGTGCTGCTGCGGTGGCGACTGCCGGCCGATCGGGTGGCTGCTCGGCCTCCCCTTCGCGC…
TCONS_00002911	XLOC_001451	XLOC_001451	Chr1:19102351-19106339	cytoplasm	0.98	3988	GCAGCCACCACGTATGCGCGCCGCCCTTTTCGTCCAATGGGAGAACGAAGCCGACGCCGTATTCCTCTTCCTCACGCCACTGTCGCCGTGCCTTCCTCGTCTTCCACCGGCGAACCGACCTTCATGAACCGACGTCCACCTCTTTTCGCCATCCGAGCCTTGAGCTCTTCTTCTTCTCTCTCTCCTCCCATGTCCGGCCGTCGCCGCCGACGGTCGATCTCCTCCCTCGTAGCTTCTCTATCCTTTCCCTTGCGCCACTATGATGGCGAATCCATTTTACCCCTTTACCCCTTCCCTTCCACCTTGAGTTAAGCCACCACCGCCACCTCCCAAACCGGCCGGGGCTAAGCTCTTGCCGCTGCTGTTCCGGCCATCCCTCTCTTCCTCTCTACCAACCAC…
TCONS_00005224	XLOC_002582	LOC_Os01g58310	Chr1:33698762-33700538	cytoplasm	1	1776	GAGAGAAGCGCGCTTAGAAAATTTGGTGACAAAGCTTGAGGATAACATCAACGAGACAACGAGGTTGTCCCCAGTAACAGGCAACGTATGCTAAACAAATGAAAAGTCACTAACCATGCATCCATCAATTAAGTTTCAGATCAACTCGTCTGTCAAGAGAGCAAAAGAAGACGAATTCTAGTCAAAAAGAGGGAAAGAACACGTTCAGTACCACAAAATCGCTAAATTAATTATTAAACACAGCCATTAATGTGCGAGGTACTGGTGGTGCATACTGGTCAAAATAATATGACCGGCCGGACGACCGGTCAACCCGATAAGGTGTGTATAAATACATGGCGCGCGCTGCAGCTTGGACAAGATACGTGCAGAGTTGGAATTTGGAAGGCGAGACGAAGA…
TCONS_00020581	XLOC_010356	XLOC_010356	Chr10:7889127-7889454	nucleus	0.76	327	TCAGGGTTAATAAAATCACATGGCCATAATATAGTCCCCTGGACTATCAATATAAGTATATTTACCTGCGCCTCGGTAAATATCATAATTGCCCTTCGCGGCATAAATTTGCCTCCTACGCGAGGACTTAAGAAGAACCACTATACAGAAGTACCACCTTTGCTAGATAACGTAGTCAGCTAGGTCTATGCCCATACGAGAATTGCGGTCGTACTCGTATGTTCTTCACATGTACTTGGCAGTCTTATGTCGGTTGGAACAGTACTAGCCACCCGGAAATCAACCATTTCTTCCGTACTGTTCCAATCTAAGTTCATTATATTTTAT
TCONS_00046718	XLOC_024018	LOC_Os02g53410	Chr2:32686076-32686828	cytoplasm	0.74	752	GACCAAACACACAAGCTTTGATCGATCTCTCCCACACGGCTCAAACGCGCATACACGTAAACACACAAGCTTTGATCCTTCTGTTCGCCATGGACGGCGAGGCGACGAGCTTGATGATCTCGCCGGAGATCCGCGACGCGGTGACGAAGGTTGCCGTGTTCGTGCTGGTGCAGGCGCTGGTCTACCTCATCCTCCGCAGCTCGTCGAGCGTCTTCTCCAAGGACGGCAAGCTGAGGTCGTCCATGAGCTTCCGGTCGATGCGGTCCATGAGCGTCAGGCGCTTCCTCGCGCCGCTCTCCGACGTCCCCGTCGGCACCGACGAGCCCTGGCCGTCGCCGTCGTCCTCGCCGTCGCCGACCTTGTCGCGCCGCTGGGCTAGCCGCCGCGAGGATTAATTGA…
TCONS_00068689	XLOC_034986	XLOC_034986	Chr4:29053703-29055784	cytoplasm	0.99	2081	CCGAGCTCTCTGAGCTCTCCTCTTCTCTCTCTCTCCCATGCTAGCCATCGGTTGATCTCCCTCACCGGAGCATTGCCGACCAAATACTCGCGCCAATAGCTTCGCCTCAATGAAGTGAATCCATTTTCCTACTTTCCCCTCTTCCCTACCCATTCCATGATCAAGCCACCACAGCTACCTCTTTTGCTGCCGGAGTTGAGCTCTTGCCCTCGCCGTTCCGGCCTCCTCTCTCAGTGCTTGTGTATGAAGCCACCCTCCCTAGATGCGCGTCGCTCGGGAACATCATCTGCCGCCGACGCTACCTTTCCCTGTCCACCGGAGCACCAGCGCCCTTCTCTCCCTCCTCTCAGTTCCCTGGCAAGAAGCAGAGAAGAGGATGATGGGAGGAAGAAGGACAAG…
TCONS_00068976	XLOC_035128	LOC_Os04g51680	Chr4:30615073-30616354	cytoplasm	0.54	1200	CTCGCCTCGCTATATATGCGGCCACTTCAACCCAAGCAACCACCAGCCTGGCCTATCTTCCTCGTCCTCTTCCTCCTCCTCCTCCTGCCTAGCCTATTTTGCTTTGGTCGATTGCTGCTGCTGTGGTGGTGGTGGACTGGTGGTGGCGGCTAGCGAGATAATAAGAGTGACTGGATAGGATGGCGACGACGGTGGCGGCGATGTGCGGGGCGGCGGAGGAGCGGGTGGTGGGGACGCACAAGGCGCCCGGGGCGTGCCCGCGGTGCGGCGGCGCGGTGGTGGCCACCGACGTCGAGAGCGAGCGCCGCATCCTCTGCCTCCCGCTCTGCGTCAAGAGCAAGCGCAAGTACTCCTGCTCCAGGTTCATTTGCCCTTGATTAATTAAGGATAATCCATCCT…
TCONS_00069419	XLOC_035287	XLOC_035287	Chr4:32619449-32620102	cytoplasm	0.91	568	ATAAACAGTAGGATGGCAGCATTTTCTCTGCCACCAGATAATCGATGAGTCATATTCCCAAATCACAAAACCATATGCTCAAAAAGGAGAAAGAGAAAAGGTGGAGAAGGCGTCCAGGTTCAATGCTACTAGGTTCCAGCTTTAGGAGGAGAGGAGAGATATTTGTAGTATAAGTAGCTTTGGAGAAGGTACATTCCTAAAGCCAAGATGCATCAAGAACTATTCTTCTTCAAGCTGTAGCCTGTAGGAGGAGGTTGCGTCAGATGGAGTTCCCCCATTCACTTCTGGTTCTTGTTTGCTTCTTCAGGTAGAGTTGATTTGGTTTTGATAATTTTCGTGTTCATGATTCATCGGGAGATGGATTTGTTTCTCAGTATCCTCATGTATGCTGTAGCTGGA…
TCONS_00070136	XLOC_035632	XLOC_035632	Chr4:22047972-22048337	nucleus	0.85	365	GAGGATCACATCACCTAGAAAAGGAAAAAGGCTTAATGCTATATATATAATCAGATCATTGCTAGTGAAGAATTTCCCCATGTGCCTATGCAATTTTGTTGCTGATCCATTAGGTAGACGACAATAATTTGAGTTGAATTGAACTGGAGAGAGAGAGAGAGAGGAAGGTGGTCCACCGTACAGTTTGCCAATAGGATGCAGACACGTTGGATCCAGCTTGGCATTTTTCTGGTTAGTTCCAGACTAGTCGGTAATGAACCGAGCCCAAATTCGCTAGAACACGTCGCGAAGGAGGCATAGAACAAACAAACAATCAAACCCCATCCCCCACCCCGAGTAATCGCCATGGATCACACGCACGCGCG
TCONS_00070200	XLOC_035696	XLOC_035696	Chr4:32623648-32624242	cytoplasm	0.59	594	AAGTTGATCACTTTGTCCAAGTAATGTTGGATTTTGTCTTACAAAATGCATTCATAATAAGTAAATATTTCATTGATGTTGTTTTTGCTGCTCCTACTGTTGTTGCTGTTGCTGCTACTATTGCTGCTAGTATGTTCTGGTACATAATTTATACTTACATATAGTTAGCGACTGCAAAAGTTAAAAAAAGGGCTTACATTTTGAGATGTGGGATGCTTTATCTTTTCTGTTACTTAATTGAAAGCATGTACAAGAGGTATCAGATATCAACGAGGAACATTTCACTTAAAAGTGATCTATTACCTCTATTATTTCCTGACCACTGTACAACATCTATATATTGAGGAGCGCATAGTATGTGTGTTTACCTCTTACTGTATAATAATTGACTGTATTCTA…
TCONS_00080053	XLOC_040912	XLOC_040912	Chr6:5489584-5490137	cytoplasm	0.75	424	CACCAGATCAGCCGAACGCCGCGGGCTAACGCGCGCCCACCACTACTCCGACCAGCTGCATGTACATGCAATATTACTGCTGCTTAATTTAAGTCATCAAGTAAATTAACCCAGCCCAGAAATGATCAAGTAGATAGAACGGAAGCAGATCCTCTAATTTAACTGCACATGCAGTTGAGTCACTGGCATATGGGTCCCACTTTACTATGGCCTACATGTCAGTGACTCAACTGCGCAGCAGTTAAATCAGAGGATCCCTTTTACACTAGCGTAGAGACCAAAGTTAAGGTCTACGGTGGAGTCAAGCAACCGGTGGTTGGGACTTGGGATTGATCAGTGATCATCATATCGGGTGGACCTGTGCGGGTCAACGTTAATTATTGTTCTTTCATTTGTTAT…
TCONS_00084929	XLOC_043574	XLOC_043574	Chr6:9895639-9901000	cytoplasm	0.99	5359	GCTATCTCTCTCTTTGTTCTCTCTCCTCCATGACCGGCCACCACCATTGCCACCGGCCGATCTCCTCTTCCACAGCCCTACATCCCAAACCCTCGCGCCATTGGCTTTGCCTCGGCGAGGTGAATCCGTTTTTCCCCTTTCCCCCTTCTCTCCCACCCCATAGCAACCACAACCGCCACCTCCTCTAACCAACCGAAGCAAGCTTTTACGCTAGCCGTTCCGGCCTCTTCCCTAACTCCCTCTGCCGGCCACCACCCTCCTCGGATGCGTGCTGCTCGGGAACACGCGTGGCCGCCGACGTCGCCACCCTCCAGTCACCGGAGCGCCGCCGCCCCCCTCGCCTTCTCCTTTCTCTTCTCTCGGCTCTCTCTGGAAGAGAAGAAGAAGAGACGGGAGGAA…
TCONS_00088393	XLOC_045515	XLOC_045515	Chr7:2175101-2177745	cytoplasm	0.97	1114	CCACAGCTCACTCAACTCGATCGACCATATACATATAGAAACACTTTCTTCTTCGTCTTCCTCGATAGCCAAAATACACTGTGCTTGGAGATCATCAATGGCGATAGCGAAGAGCGAGTGTGAGCGCCTTGCATGGGCATTGCTACTGGAGAGCAACCTCCTCGTCGGCAACCGTCGCAGCAACGGCGACGACGACGACGACGACGTCGATGTGGCTCCAGCTGCCTGATTTAATTACGGATATAATATGATTATTACTACTGATCATCTAGACTATATTATGATGAGTATAACGATCTCTACGTTAATAAGTTCTGCATGGTCTAAGAGTACTCATCTACATGCAAATATGCAGCACTTTCAATTAGTCCTGTAATAGGTGATCACTGTGGTGAGTGT…
TCONS_00093771	XLOC_048354	XLOC_048354	Chr7:9537201-9541906	nucleus	0.68	4705	GCTTGAAGCTCTTCCTCTCTCTCTGCTGTCAACTCCGGCCGACTCCGCCATCGGTCGATCTCCTCCCCTATAGCTTCCCTCCTAGTTTCCTTGCACCATCGGCTTTGCCTCCCTCCGGCGAACCCATTTTTCCTGTTTCCCCCTTCTTCCCCACCCCATAGCAACCACCACAACCACTTTCTTTGTAGCCGAAGAGAAGCTCTTCTACTTGCCGTTCCGGCCAACTTCCCCTCTCTCTCGGCCAGCCACCGACTTCCCCGGGTGTACGTCGCTCGGGAACACGCTTGGCCGCCGCCGTCGAGGCCGTTCCACCATCGGAGCACCGGCGCCCCTTCTCTCTTTCTCTCTGCTGTTACACGGGAAGAAGAGGAGGAGGAAGATGACGGGAGGAAGAAGAAA…
TCONS_00094026	XLOC_048525	XLOC_048525	Chr7:11714271-11718337	cytoplasm	0.95	4066	GCCGCCTATAAAAGGACGACGAGGTTCCCTCTTCCTCCCCACACAAACCGAGCTCCTCAAGCTCTCTCTTTCTCTCTCCATGTCCGGCCATCATTGCCATCGGCCGATCTCCCTCACCGGAGCTTCGCAAGCCAAAACCCTTGCGCCACCAACTCCGCCTCGTCGAGGTGATTCCATTTTTCCTATTTCCCCTCTCCTTTAGCCACTGCCACAAGCACTACCGGCACCACCATAGCCGGCCGGAGCTGAGCTCTTGCTGCCGCCGTTCTGGCCATTCTATTTACTCCCTATGCCTTCCACCGACGTCCCCGGATTTGTAGCTAGCGGGAACACGCTTGTCCGCCGCCGTAGAGGCCGTTCAACCACCGAAGCCCCGGCGCCCTGTCCCTCTTCCTCTCT…
TCONS_00096504	XLOC_049807	XLOC_049807	Chr7:9482055-9482581	cytoplasm	0.74	526	AGCACGGCTATTCGAATAGATTCATTTATACTTTACTGCAGTAAATGTACGCTTTACCCGCAGTCCACGACTTGCCAATATTCATTAGCTTAGTCGTAGCCCAGCCTTAGGTTATTAACAATAGAGGCACCTGTTCCATGAACTCTAGTCCCCATGCGCTCTGAACGTAACGTTATCAGCAGCGAGAGGAGTTCTGGCGTTCCCGAGGTTTTTAGAGAGAACTGGTTGAGAGACCCCCGTCATCTCAATCAGGTTTTTCACAATATACACACACAGCGATCACAATATAATCAAGATATTTACCTGCGCCTCGGTAAATATCACATTTGCCCTTCGCGGCATAAGTTTGCCTCCTTCGCGAGGACTTACATAAGAACCACTGTACAGAGGTACCACATT…
TCONS_00098405	XLOC_050893	XLOC_050893	Chr8:13481657-13484832	cytoplasm	0.83	3052	CAAATGGAGCTTCATCTCTCTCTTTCTCTCCCATGTCCGGCCATGACTGCCCCCGGCCGATCTCCCTCATTGGAGCTTCGCAAGCCAAACCCTTGCGCCACCAACTCCGCCTCGCCGAGGTGATTCCATTTTTCCCGTTTTCCCCTTTTCTTCCACCCCATAGCAGCCACCATCGCCACTTCTTTTAGTGGCCGGAGCAAGTTCTTGCAGCTGCCGTTCCAGCCATCCCTCTCTCTCCCTCCGCCAGCCACCACCCTCTCCGGATGCACGGTGCTCGGGAACACCATGCGCCGCCGGCGTCGCCGCCCTCCAGCCGCCGGAAAACCGGCACCCCTCCTCCCCTTCCTCTCTGTTCAACCGAAGGAGAGAACGAAGAGACGGGAAGAAGAAGAAGAAAAG…
TCONS_00002159	XLOC_001049	LOC_Os01g24764	Chr1:13934494-13935952	cytoplasm	0.97	1360	CACTCTCTCACTCTGTCTCCTCTCTCATTATCCTCTCGCGCTCGAGTGTGTGTGGCGAGTGCGGCCGGCGGTGGCCATGAACAGTGGTGGGCGCGGATGGCAGCACTGAGCGGCTCGGCAGCGGACGCGGACGGCGGTGGGTGTAGCCCGCGGCACTGAGCTGTTCGGTGGCGGGCGGATCCACCTCGGCCAGCCTCGCAATGGGCGGTGGGCGGCCCGGTTGACGGTGAAGGCGGCGGCTCCCTCAACCTCCCCATGAAGCTTCGATGGCGGCCTGAAGCGACGACGATGATGAGGAGGCGGCCGGGAGGGGCGCCACCGGCCCCGCGCGCACGCCGGCCGGATCCGCACCGTCCTGGCCAACGACGATGACGAGGAGGAGGCGGACGGCGCCGCCAG…
TCONS_00003058	XLOC_001530	XLOC_001530	Chr1:20197290-20199992	cytoplasm	0.99	1469	GCGCGCCGCCTCGCCCTCCTCGGCTATTCCTCCCCTCGCTTTGTGCCATCGTCGCCTCACCCTCCTCCTATTGTCGTTGCGCCGGCGCCGCCCTCCTTGCCAGTGGATCCAGCCATCCGGAGGAAGGAAGGGTCACGAGGCCATCAAGCCATCGCTGCCCTCTTCTCCCCTCTCATCTCCAGACCACTACCGCCTTCCTCTTCCTCTCCCTATCCTCGGTGAGCTACAGATCCGGTTTGGGGTCATTGGAATCGATGGTCTCGGCCTCCCCACTGGTGGATCCGATCACTGGAATCATCGGTGAGCTACAGGTCCGGTTTGGGGGTCAGCGGAATTGATGGTCTCGGCATCCCCACTGGTTGATCCGATCACTGGAGTCACTTGCGGCCATTGGTTTCC…
TCONS_00013955	XLOC_006563	XLOC_006563	Chr1:1138185-1138415	cytoplasm	0.5	230	AGCAAGTGAAATCTCCGCGCCAGGAGGAGACGGTTTGTACGACTACATCGAGCCCGAAGGTTGCAAGACATGCACCCTCCCTTGAACAATTTAATCCCAGTAGTTAGAGAGTTATTTTGGTAGCGTACTCGTCCTTTGGAGTACGATAGACTGCACGAATTCTTTTAAATTAATTATATTACTATTATTGCATTATATTTTCTGTTGTTGTTATAAACACCTTAATGAGC
TCONS_00013956	XLOC_006564	XLOC_006564	Chr1:1635803-1636275	cytoplasm	0.95	472	CTAATCTTCACTTCACTTCAACTTCATCTTCGGAGCTGGCAGAACTATATTTATATAGAGAGCAAGGGTGAGTACTTACGTACTCAGCAAGCCAGGGGAACTTAGGTGGTTAATGCAAGCTTCAAGGGAAGGCTGTTTATTTAGCAATCAGTTTTGTTTTCAAGGTTTTCAACAATCTAAGTGTGTGCTTTCCACAACCAGAGCGAGACAAAGTCTCAGCTCGGTCGGGGTGAGAAGTAACAAATTTATTTATCAAGATTTGCACAACTCCAAGAGTTGGCTTCAAATCTAGTTTTCCCAAACCAAACCAATTTTCCAAACTTCCCGATAATAGTGGTCCCCAAACGACCAATCACTTCCAGGGACTCCCGGTCCCACTGTCCCCCGGACAGCTAAATG…
TCONS_00013994	XLOC_006602	XLOC_006602	Chr1:10170642-10170852	cytoplasm	0.72	210	CGTTTGGCCTAAACAGCCAAAGAATAAGCCAAAATTTGAATTTTTGAACTTAATTTTGAAGTTGATTTTGAAATGCTTTTAACGTAATTTTTGTTAATTTTGGCTTTTAAGTCGCTACGAACAAATCTACAAAAGTTTTACTTATAAATTAATTTTAATTTTCTAATAAGCCAAATAAGCCATTTTAGGTAAAATGGCAACCGATGGGAG
TCONS_00014114	XLOC_006722	XLOC_006722	Chr1:32496805-32497331	cytoplasm	0.99	526	CTGCATAGTTAGGATGTACACAGCCTATCAATATTATAAAAGAAAAGGAAAAAAAAGCGACACAACTGCTACAACCGTGCCGCAGCGACTTACATCTACGAGTAATCTTCATCTCTTATCTCCACCAAAACAACACTTAGACTATCAAACGGACTCCCTTTAAAACAACGCCTCCAATGAGGAAATGACGTGCGCACGCGTCATCATTGTAATGTTCCAATCAACTAAGATCAGACCATAGGTTTTCACCTAGGGAAATTCTGTGAACTCTAGACAATGTCTTCAAGAAGGAAGAACATCCATTGCCAAGTACAACCAACTAAGGACAGACTTAGGGATTTAACCCCGGAGTTAAAGAATTAGTAACAAGTACCGCCTGAATGAAGCCCACTAGTATTG…
TCONS_00023562	XLOC_012049	XLOC_012049	Chr11:23140917-23145640	cytoplasm	0.99	1900	AGGAGAAAAAGAAAAAGAAAAAGGAATCCCTGACAGTAGAGTCTATTTTATATGGATGGCAACCTGTGGTATTTCAAGCATCAGATAATCAGGTTGCCTATTTCGGATTTATTTGCGTTGGAGCAAGGCAAGTTATTATTCCTCCCCTTGAGCATAATTACCCTATATTCTATATCCCTTTTCTATGCATTAGTCATTCATGATTTTGAATGCATAACCTGAACATATAGCAAACCAGATATGCTAGCTTTTGCTTAGCCCTGCCTAGTTAGATTATGCACAAAATTTAATGAACTTAGATTGGGATAGTATGGTAGAAATGGTTGATTTCCGGGTGGCTAGTACTGTTCCAACCGACATAAGATTGCCAAAGTACATGTGAAGAACATACGAGTACGA…
TCONS_00027834	XLOC_014436	LOC_Os11g43895	Chr11:26505322-26507776	cytoplasm	0.98	1244	TCCTCTCCTCGTGCTCTCTCGCCCCCTCGCCGCCGTGCGCATCCCCCTCGCGTCCTCGCCCCCTCACCGCCCGGCGGCAATCGATGTGCTCCTCCTCCGCAGTCCGCACCACCATCGCGCCGCGCGCCCCTCCGTACCGCGAAAAATCGCCGCGCCTCCCCTCCATCGTTGCGCCTCTCCCACATCGCCGCGCCGGCGCCCACCATCGTCACCGCCGCCCATCGCTCTCCACCTTGCCTCCATTGCGGCTACGCCCTCCCTCTTTCAGGATCTCCACACCTCTCCTCCTCCTCCCAGTGCTGACGCTGTCCCCCCGCCTTTCCTCCTTCCGCCCACCTACTACCGATGCCGCCACCCCTCGCAGTGACTCCTCCCCGACCCCGACGCCGACGCCGACGC…
TCONS_00028143	XLOC_014608	XLOC_014608	Chr11:2012335-2012869	nucleus	0.52	534	GGAAAGCGACGCGGCGATCGAACGCGATATCATATCGAATCATCTCCACTTCTCGATCTTCTTCAGTTGGCCGTGCCAGGCGTCACCGGATCCGCGCCTTCAGATTTGGGTGACTCCGCGAACCACTTCGCGTTCCATGTGTTTTGCCTTCCTACTCGCTGAGTCGCTGATGATATGATAAGGAAAGTTGCTGGCTGCATCGCCAAGATTTGGCTGGGGAAAGTTGGTAGCAACCGAGAAATCGTCCGATCAGGAGGATTTCTTGGCTGGTGTGGCAACCCCATCCGATCCGAGGATTTGAAGCCTGATTATATTTTAATCTTGTTGTACAGGAGATGCTATTTTACTAATCTTCTTGTACAGGAGATGCTTATCAATTATTAGCAGTTTGTTTGTGGC…
TCONS_00035411	XLOC_018761	XLOC_018761	Chr12:3907421-3907776	cytoplasm	0.67	355	ATAACTATGTGCTAGAAAAGAGCAACAAAATAGTAAATGCTTTAAATATGCTATTTTATACTGGAAATAATTCTTTATTGCAGGGAAAATGTGTGCTCTACTTGGGCAAGAACCATTTCTTTGATGCAATGCTCTATTCAAGAATTGCAACAATTGATGACGGAGTATATTGATTCAACAAAGTATTCTGGTACATCAGATTCAATTAACTTCATAGTGAGCTTCTTGCTCAACAGCTATGGCATTCTGACATAAATTTTAGGACCGATCCAATCTAGCATAGGAGATTCTACGTCCATGGCCATGCAAATAGGCTAGGAGTTCTCCCCCTCAATTCATGATGAGTGTGCTATTA
TCONS_00035427	XLOC_018777	XLOC_018777	Chr12:7125608-7125834	nucleus	0.57	226	TAATAGTACGTATACTACGTATACTTGTACAATATGTACACGGCATGTACACATAAACGTACATATACATGCGTGGTAGGTACGAAATGTACGAGTGGACAGTACACGGCACTAGTTTCGTATACTACTCAATTCGTACGCAACACAGCACTAGTCATAAAAAAGGAGAGAATTTAATTCTCAAAGAATAAAAAGAGATATGCGCAGTGAGCAAACGGACCTTAAC
TCONS_00037888	XLOC_020026	XLOC_020026	Chr2:15206969-15207612	nucleus	0.56	318	CGCTACAGAGTACAGACCAGGAATTCCTATTTATTAAAAAGCTATGGTATGTTAGCTACATTTTAAACGAACAGGATATGATTATCTGAGCTTTGTCCAGCTCCAGTCTCTAAAGATGGGATGTTCAGTTTGTAATCATAGAACACACGCGCAACAATCTTGCAGTGGGGAATACCATGATGCACAGGTTAGAATGAGAGAGGGATGGCATTGGAATTGTCAAAGATTTCTCATACACCTAAGCCAAAGCCCTTTCCTCTTTTGGTCTTTCCTTCTTTCTATGTAACAAGGGAATGATCTGGTCACAGAATACTGCAG
TCONS_00038200	XLOC_020194	XLOC_020194	Chr2:17271085-17335614	nucleus	0.5	3408	GTCGTTCTCTTTCTCACGTCGCCGTCGCCATAGCCATGTCTCCCTTCTCCCCTCCAAACCGACTTTAGAAACCGACCTCCGCGGCCTATAAATAGACGATGAGGTCGCCCCTTTCCTCCATACACATCCGAGCCTCGAGCTCTATCTTTCTCTCTCTTCCCCAATGCCGGCCGCTGGTCGATCTCCTTCACTGGAGCCCTGCAGGCCAAGCCCTCGCGCCACTACCTTCGTCTCGATGAGGCAAATCTATTCCCCTACTTGCCCCTTCCTTTTCCCCTCCGAGATAAGCCACCGCCGCCGCCTCTTTTACCGGCCGAAACTGAGCTCGTATTGTCGCCGTTCCGGCCGTTTCAACCTTCCTCTCTACCAGCCACCAACCTCCCCGAGTGCGCGTCGACC…
TCONS_00047403	XLOC_024306	XLOC_024306	Chr2:7982027-7982415	nucleus	0.5	388	TTTTTTTTCATATGAGTGTCCAAATCTAACAGCATAGTAGTCACAAATGGAGAGTCTGGCACGCGAATTATTATTAGTTAAACTTCCGTATAAGTAGAAATGGAATGGTGGTTTTTTATATATGTTGATTAGTCCCAGTGGATATTGCTGGTCAACAACTTGATTGACACGGACAAACGTAAATACCTGCTACACTTAAATCGATTTGATTTGGAATGAGTCGGAGCTCAGTGAGATCCTTATCAAAGGAATCATTCCAAGTTGTATATCGCGACTAAACGGTATATGAAGTGTTTTAAAGTAATTGGACAATTTCACCTAACATCTGCTGATGAATCGTCCTCACGGTGATTCATTTTAGCGATTCGAGGACCAAAGACATGCTCAT
TCONS_00047482	XLOC_024385	XLOC_024385	Chr2:24559570-24559808	nucleus	0.76	238	CATGCATGCACGTGATTGCCTCACCAGCCAATCTTCACACGGCTAGTTATTGGTTAATTATACATGCACATATACTAATCCAAGTATATATATTCCCAGCTGCCTGTGCATGCATGTATTTGCGTGTATATACATGGCCGAGCATTGCGTAGAAATGATAAGCTAGCCAACTTACAAACTGCTTGTTTGCTTTGTCCATCATGAGTAAGTCTTGTGTACACATATAATAGCCAAAATA
TCONS_00047502	XLOC_024405	XLOC_024405	Chr2:27741050-27741470	cytoplasm	0.94	420	CTGGTTTTGCGGTTTGAGGACGTTTTCGGATCTCGGTGACAAGTTCAGGGACCTCCGGTGCACTTTTTCCAGTGAACTGCGAATCTGTGATGACTGACGAGCGATGCTGGATGATTATGGTCCATTGCATCCATGCTCCAAAATCTATTTTTGAAGCAAGCATACCAAAATTCGATAATGACATTTGCATGCACTAACGAACCAGGTTTAGATATATACTAGTACTCATCATGTCTACAGGTTTCAGAATAAAGTCTTTTGACTAAAGCAATGTGTCCGTTATCCAATCAAGAGGACCTCAGGCCACAAGACATGAAAAAGAACATCAAGTGTGTCCCACGGAAAGGACAGAAAAATGTCTGGATCTTATATATACTCCGTAGATTCTAGTAGTAGTGT…
TCONS_00058822	XLOC_029640	XLOC_029640	Chr3:31998163-32000283	cytoplasm	0.94	2010	CTTTGCTCTCCTCTCCACCGAGCGTCGCCGCCAACCCTAGATCCGCCTGCAGCTCCTCCGCTCCTCCACCCACCACCGCCGTATCTTCCCTCATCTGGCCATCCACTCCGGTGATGTCGAGCGCGTGGTGTCGCAAGAACGTTGCCTCGTTTGGTGAGAGGGGATAGTGCAGCGAGCCGCCTCCAATCCCTTCTGTCCCACTGCTACTCGCTGTCGCAGAGAGGAGATTTGTCCGACCGGGTTTCATGAGTCAACCGTCTATTTGCTGTCCCGTGCACCAACACGAACATTGACCCGATTTCATTCTGACACAGTAGTAGTAAGTATCACGAATTGTGCATTTTATTCTAAAATGTACTAGATTTATATAGCGTTTGTCACACATTGACTAGAATGGAT…
TCONS_00059595	XLOC_029970	LOC_Os03g62920	Chr3:35599959-35601153	cytoplasm	0.76	895	CTTTGACGTCGTCGCCGGGGGCTTCCGCAATCTGCGCATCCGCGCTCTGCAGATTTGCAAAGTTTTGTGAATTCAGAACGTAGCTGATGCATAGCTGCATACGGCGACGAGGGAAGAGCAGGATGGGGAAGAAGGGGCCGGACCCCTCTTCGGCGCCGGCCGCCTCGCCTCCATCGTCGCCGTCGCCGTCGACGTCCTCCTCTTCCGACGCCATGCTCGCTGTAGCCATCTACGTTGGGGGAAAAGAGGAAGAGGATTGGAGGAGGGAGAAAGAGGAAGGAGGGACGAGGGAGTTGATGCTGACGCGTGGGTCCCAGTGTCATAGATTCAGAATGGAAGGCGTAGATGGAGAGGCTGTTGGAGTGATAAATGAGTTTGGCTTACAATTCAATTAGAAAG…
TCONS_00059752	XLOC_030042	XLOC_030042	Chr3:2971490-2971996	cytoplasm	0.88	506	AGTTCGCAGTCGCAAGGATCAGAGTTCAGAAGATTGTTGTGAAGAAGCAAGGCAAGTCACACATTCCCCTTGAGCATGTTGATCCCAATTTATAAATTTTTTACCGTTTGCAAATAAACATGCATGTTTTGCTAATTACATGGGATCAGGGTTTTACCTATCTGTTTGCTTGTGCCATGTTTACTTTATATCTGTCCTTTGTCAATATTGGATAATAAATCGACTAGCTTATGTTACTTATGTGACCTAGCTAGAACTATATGCTTAGCCATGCTTAATTACCACTTGCTCAGTTGATGGGATAATTGCAGTATTAGACCTTTTTAGCAACAGAACGAGTTGCATGCTCGAGACACCTGGCCATGTTTCAGTGGTCGTAATTATCCAACTAAAATGTAA…
TCONS_00059824	XLOC_030114	XLOC_030114	Chr3:13708475-13708780	cytoplasm	0.9	305	CCCTTAGTTATGCCAATTAGCCAAAATTAGTGATCTAGAAAAGCTTGTACCAAAAGAAAACAAAGGGATAGCAGAACTGTAACAGTGTTTAAAAAAAAAACAGAGATCGAGAGTAGAGTGAGTAGCGTTTCCATCAATTAATTCCAGTAGGTTTGGTTGCACTAATGCACTGCATCCTCCCAGTCATCCCGATCTCGATCAGAATTCATACATGCTATAGTACGTACCGAGAAATCGACGGATCAATTAAGAGGGAGGGGGGAACGCGGATTAATTAGTGGGGAGGCAGGGCAGGAGCAGAAGGG
TCONS_00059828	XLOC_030118	XLOC_030118	Chr3:15161351-15162078	cytoplasm	0.47	727	GTGAAGAATCTGATCCTGATCAGAGGCTACCCTTTAGACTTTAGCTTGCTGGTTTGATTCCAATCCTTGGTTGGATGAGTGGTCCAAATTTACCCAGTTGCACCAGTAGTTTTAACTTAGCCTGAAATTAATTAACTTAAGAGTTTCTTTCCTGTAGTGCTGCATTCAGTACTGCATTTCTCTGTACTTCTCTCTCTACTGTATACTATGTCAGTTTGTTGAGAACTAGATTAGATTTCTCTCTACTGTATACTGCATTTCAGTACTGCATTTCTCTGTACTTACAATGATGTCTGTTGAGTAGGATCTTGTAAAGGGTAAAGATACATTGATGCCATTGGTTGATTTTCAAGAGAAGAAATGTACAGGATGGAGGCAGCTGAAGATTTTGCCATCTGG…
TCONS_00060891	XLOC_030829	LOC_Os04g16830	Chr4:9093546-9210338	ribosome	0.97	2844	CGTCGAGAGGGAAACAGCCCGGATCACCAGCTAAGCGATCTGCCGAAGCTGTGGGATGTCAAAATGCATCGGTAGGGGAGCGTTCCGCCTTAGAGGGAAGCAACCGCGAAAGCGGGGGTCGACGAAGCGGAAGCGAGAATGTCGGCTTGAGTAACGAAAACATTGGTGAGAATCCAATGCCCCGAAAACCCAAGGTTTCCTCCGCAAGGTTCGTCCACGGAGGGTGAGTCAGGGCCTAAGATCAGGCCGAAAGGCGTAGTCGATGGACAACAGGTCAATATTCCTGTACTACCCCTTGTTGGTACGGAGGGACGGAGGAGGCTAGGTTAGCCGAAAGGCGTAGTCGATGGACAACAGGTCAATATTCCTGTACTACCCCTTGTTGGTACGGAGGGACGG…
TCONS_00061576	XLOC_031311	LOC_Os04g26590	Chr4:15515196-15518592	cytoplasm	0.98	850	CCGCACCTCCACCAGCCGGCCGCCCACCCAAACCATCCCCTCCTCCCCACCTCCGACTCGACCCAATGCCTTCCCATCTCCTCCGCCGACTCCCCATCGCCTCCACCTCCGGTGCCTGCCTCCACCTCCTCTTCTGACATTAAGGAAGTCCCCTTATTCAGGTGCTTTCGTGATGGATTTGGAGGGGAACTTGTAGCCATTAGTTGCTTAAAAGTCGAGGGTAACTAATTGACCAGCATTTGTTCTGTACTTTAACGAATTTTACACCGATTGCAACCAGAATTTGTTTCGGGTGTTAGAATTGGGAGAATGACAAGGGAGGTAACCATGAATCTTAGATCAACAAGTTTAGTGGTCCACTATCGATTTTTCTACAATCAACCTACGTTGTTGACCATC…
TCONS_00065402	XLOC_033277	LOC_Os04g10924	Chr4:5920296-5925021	cytoplasm	0.99	932	CACAATCTCACCAACGGCAAAAACTGATCTTGCGCTAAATTTTTTGAAGATGGCATGATAACATTCTATTGCCATCCGGCCAACACTTTGATGACATAACGCATTATAAACTCTTCACAGCAAAGACGTGACCTAGGACACCCCATCATAGTCATCACAAGTGAGTGGAATGTATTTATGTAATGTAAATTAGGATTATTCATTCATGCTTTGAAGCTATAAATATAGCCATTGTGATGTTAAACATTCAGACCATACCTCCTTCAGAGCATCTGCTAAGCAAAATCATGAGCGCCAGGAAGGCAAATCTTTTTGCATTAGCGGTCATGGCATTCTTCTTCGTAGGAATTGTAATTGCTGATGTGACACAAGGAAATTCAGAAGATCTTTTCCTTGGTA…
TCONS_00067944	XLOC_034673	XLOC_034673	Chr4:24981264-24981638	nucleus	0.51	293	CCGCCGACGAGCTCCACGTGCTGCCCCAGCCGCCGGCACTCGTATCTTAGGTGGAGTTGACAAATCTTCTTGATGCTGTCCAAGAAACAGAGACAAAGATAATAGAGATGTCAGCACTTAATCATCTCATGTCAACTGTCAACACATGTTCTACAACAAGCTCAGCAGATCCAGTATTTATATGACCAGATATTCGTGGAAAAAATATAAATGGCGCTCTTCTCAGGCAGTTGAAACTACAAACGAGCATGGGAAAGCTGCGACGGCGGGGAGAGGTGTCAGGGTGGCGGCGG
TCONS_00070062	XLOC_035558	XLOC_035558	Chr4:4644201-4644864	cytoplasm	0.98	663	GGCTTATAAACATAAGCGAAATGAGACTATACATGTCCCACTTTGATTTGTCAGTAACTACATTTGATTGGATCATAGATAGATTAACAGGCATCCACAAAAAAACAGTAACTGCAAGCCACAGGGCTCCATGAGAAAATGGAATATAATAATAAATAATGTACATAATGTCTCATGACATTTTGCATATTTGCAATTTCTTTTTTGTTATCTCCTTTTATCTCTATGGATGGCAATGTTTGCATCCATTCTCCTTTTTTTTTTTCCACTGGACTCTTCCCAGTGAACATAACCGACAAAGAACTACTAGGAAGCTAGTAAAATTGAAAGAAGAAAAAAGAAAGAACAAAGAAAATTTCAGAGTTCAGACCACCCCAACTTTCAGAAACAACTCCTCCC…
TCONS_00070084	XLOC_035580	XLOC_035580	Chr4:10976288-10977963	nucleus	0.81	1675	CAGTTAGCTCTTGGGCTCTGTGTGATCCTAGCCGCTCCGCCGCCACTCACGGTTGTCGGAGTAACACTTCCTCCCCACTAAACCCACACAAACCTCCTATCCCTCTAGCCGTTATACTCTATGTTGACACCGGCTAGAGAAGATACCAATTCTAGTCATTATACTGCCCAACTCTAGCAACGACCAGCAAACACCTAAACCCTAGCTGATATTTATCCTACCTCAATCAGCTTGCTATCCAGACCCCACGCCAGCTAGAATATCATCACAACCATTTACCCTCCAACTACCTATAACCTATACATGAAATACGAGCCGATATGCTATCCTATTTCAGCATCGACTCGAGAACAAGTAAATCCTGGCCATTCTTCTACCAAAGCCCAACTTCAGCCAATA…
TCONS_00071911	XLOC_036674	XLOC_036674	Chr5:13232896-13234730	cytoplasm	0.95	1834	CGTTTTCTTCTTTAACAAGACCGTTTCTGCTAACTTCATGTTCTACTTTACCATAGCAGCAGTGTACTTAGCTCCCAAGAGTTTTTCGTGGTACTAACATATTGCGCCTGTGCCTGGAATAATCTGAAAGTATAGAGCATCATGGTGTAAATTGTCATATCTGAGACTTAATGTGTGCATATGTGGCATTCATGATGGAATGGTTCCATTGCTTGCCATGATTGTAGTTCTATGCAAACTTATGCGTGAATCTAGCGGTTATGCACATTTTACTGGTACTGCTGCAGCTGCATTTCCTCCTTTTGACTGTATTATAATCGGTGAGGGGAATGAATGAATTATTACCAGCCGAGATTAAGAAAAGCAAATGAGCTGCTCCTGTTTTCTCTTTCCTTGTTA…
TCONS_00077477	XLOC_039631	LOC_Os05g37060	Chr5:21652369-21655652	cytoplasm	0.93	1949	AAGAGGTCGGCGCCACGCGACCGTATCACCGAATCCATCCAAAAAGCGGCTGGACACATGGCGCCCACTAGACCCGCACCGCGACAAGGAACTCTAGCTCGTACTACCAGTTCTCGGTTGCTCTCGCTCATCACTATCTTCTGAGCTAATCTCTTCCTTTTCTTATCATCATCCTGATCAAGACAAATGCAACAGAACCAAATGATGTGTACATGGCTGAGGCTTGCTCCAAATCTCTATATAAGCTGCCCATTGCCTCCCGTTGTGCCACAAGATCCAAGGCTATCTAAGCACCGGCATTTGCATACAGCCGCCTAAGCAAAGAGCACAGCAAGTATACGCGAATCTGAGTGTGTGAGAGAGACTAGTAGCACAGACGAAGGTATGGCGTTCTACCTC…
TCONS_00078977	XLOC_040359	XLOC_040359	Chr5:11216994-11217778	cytoplasm	1	784	ACAAACTGACAATTTAATATACAGATTCATCATAATAATAACGTTACATACTTACAAAAGAAAAGAAAATAGCAGCGGAATTACGGTCTAGCGAAGCTCCGGCTCCACTCCCACAGGCAGCTCAACTGGGGTATAAGCCAAACGTCTTCTCCTTCGCAACTTGTCTTCAACTGAGGTTTGATTAATTATTGCAAGGTGAGCATATGACGTACTCAACAAGCCACACAACAAATATGCAAGTGCACAAGAATACCAAAGAATGGCATAATATAGGGCTTATTTGCAAAAGCAGCATTTAGCAAACATTTGAGAATTGTAAAATAGTAGAGTAATTAATCATCAATATTAATCAACACTGAACAACACACCCATGCTGCACAGGCCCAACCATCCTGAACA…
TCONS_00078979	XLOC_040361	XLOC_040361	Chr5:12259917-12260663	cytoplasm	0.97	746	TCTCGGGCTCTGTGTGATCCTAGCCGCTCCGCCGCCACCCACGGTTGTCGGAGTAACACTTCCACCCTACTAAACCTGCACCCACCTCCTATTCCCTCTAGTCGATATGCTGCCTGCTGACACCGACTACAGAAGACACCAAATCTAGTCATTATGCTCTAGCATCGACTAGCATACAACCAAACTCTAGCTGACACCTTGTTAGTTGAATTCCAACCGTCATCTAAGTCCCACACCCACCAGTATCGCCTATCCACCATACTCTCAGCCACCTACTCTTCACCCACCAGAACCTATACATAAAATATAGAACCTAGCCGATATATTGTCTTACACCACAATTAACTCCCATATAACCAAACCCTAGATATGATACTACCTAAACCTACCGCCACCAAA…
TCONS_00085253	XLOC_043772	LOC_Os06g21620	Chr6:12471652-12476482	cytoplasm	0.99	2171	GGCGCAGATCGCGCAACTCCCCTTCAAAAAAAAAAAAAAACTGCAAAATCTCAATGAATCTTTCGCCGTCTCCGAGGCTTGCACAACTCTTCTTCCTCATCTTCCGCGGCGGCGGCGGCGGCGCCGGCGACGGCCATGGCGGCGGTGGCGGCGGCGGAGCAGAGCGCGGAGCAGTTCAGGGGCCAGGCGAAGCTCCTGTTCCTCCCCGTCGCCGACGCTGTCCCCCGCCTTTCCTCCTTCCGTCCACCTGCCACCGACGCCGCCACCCCTGGCAGTGACTCCTCCTACCCGACGCCGACGTCGATTCCCCCGCCGCCAACGTCACTGCCATCGACACCTACTCCTGTGGCAGTGTGGAGGACTGTTGCTTCCGTTGATAATGCATCCCCGCCATCGCGC…
TCONS_00091114	XLOC_047008	LOC_Os07g37280	Chr7:22339614-22341401	nucleus	0.73	1062	GAGGAGGGGTACTACTCCAACCAAAGTTTTTGCTGAAAGTTGCAGGGACTTAAAAACGGTGATGCAATTGAGAATTGACAGGCACAGGCACAATCAATTGGATGATGTTGCAGTCTTGCAGAAATGCAGAGAGGACAAGCCATGAAGATGAAGTCCACATCCAAACCAGATTGGCCTCGAGCTATACCATGGACTCTCACCTCCCTGAGCTCCTGGTTTGGAGGAACCTATGGTCTAGCCAGCCACCTGTTTTCCCCATCTGCCTCAAGAAACCATTGGCCACTGTGCCAAGTTGGCCCATGAACACCAACTGTATATATAAACATGCACAGCTTCTTCAGTGATCGTGAGGTTAACAACAAGAACAAGAAACGATGAGGTTTGTATTGGTGAACAAGG…
TCONS_00096512	XLOC_049815	XLOC_049815	Chr7:12460295-12460565	cytoplasm	0.53	270	TAAAACTGGACAGTCTCTGCAGAGGTGAATTAAATCATTCGAATGTGCCGTACTCCCGGTTCTGGAGTTGTGTCATCAGGGTGATTCCTACTCCTGAAGTATAAGTATTTTTAAAATTAAAATGTTGAGGATAAAGATGATTTATGGTTTTTATTATTCCTTTACTTTATTATTGTTTTATTTATTCATATCTCTTCACATTTAATTATTTATAATATGTCTTGCTGAGTACATAAGTACTCACCCTTGCATAATTTGACATATAGAGAA
TCONS_00096533	XLOC_049836	XLOC_049836	Chr7:20199931-20200155	cytoplasm	0.89	224	AAATCTTAAGTCCAAACTCAACTCACACGTCGAGATATAAAAAAGACAAATTCAGCATATGAATAGTAGCGTACTGTTTATATATAAATTTATCTTTTTTGTTTCTCAATGTGTAGATCGAATTTGAACATGAATTTTGGTGGACTAGTAGGTATCATTATACTCTACATTGTCAATTTTTTTCAGAATTTTTCACAACTATTTGCATCGAATTTAGAAGAAAA
TCONS_00096554	XLOC_049857	XLOC_049857	Chr7:23994733-23995332	nucleus	0.57	599	CGAGATGCCCTCATGCCGCATGTCTTTCTTGCAAGTCATCCACGGTCATTTCTCCAAGTCCAGTGAAACCCTCTTTTTTCCCCTTCTCCAACGCCTCCCCTAACTCTCATATCTAAACTCTAAATCTAGCATCACAGTCGTTGTCGTTACCGTAGCCAGAGACAGAGAAGACTCTATTATCGTCACGAAACTTAGCATGAATTATACAATAAACAAATTTAACTGCAAACTAGGGAAATTTCCCGATGCAATCTTATGTGTCCTAGTTAAATTGGACAATTAGCTCATGTTTTTATATATGCTATACTTTATAAACGTAGATGTTAATAGTAGAATTAGAATTTAATGTACAACTATCTTCTTCAGTTTCTATTGCCTTTGTATACAACTATTGCTATT…
TCONS_00099726	XLOC_051638	XLOC_051638	Chr8:23886976-23888276	cytoplasm	0.81	372	CTCAACTGGTCACGCGGCAGTGCTGGGTGCGGAGGCTGAGACCAATGGCGAGGTGCTAGTTGCCGGGAGATGGACATCATGAACCTGTGAATGGTTATGGACAATGACGCAGCAGGTCCCAAGAAAACAACATTATGCCAATTAACATGGAAAAAGGCAAGGTGGTTACTCTTTTTCAGACATAATAGGTATTGCTATCATAATTATCCTTTTCTTACTAACTATTAGAGTGTGAAACACGTTCATGAACTGCTTTCCTGTTAGGTGGTATGTCTACCTTCCTTAGTACAATTGTTTGGTATTGTAGTATGTGTGCCCGTCCCGTGTTCAAAGTCCTTTTATGAATGTGGAAATTTCGTCATTTTTTTCTAG
TCONS_00102955	XLOC_053362	XLOC_053362	Chr8:18275118-18280444	cytoplasm	1	5326	GAGCTTTCCCTTTTTCTCTCTCTACTCCCATGTCCGGCCATCACTACCGTCGGCCGATCTCCCTCACCGAAGCTTCGCAAGCCAAACCCTTGCGCCACCAACTCCGCCTCGCCCAGGTGATTCCATTTTTCCCCTTCCCCTCTCCCTCCACCTTGGGATAAGCCGCCACCACCACCTTCTCTTATCGCCGGAACTGAGCTCTTGTTGCCGCCGTTCCGGCCATCCCTCTCTCTCCCTCCGCCTTCCACCACCCTCTCCGGGTGCGCGTTGCTCGGGAACACCATCTCCTACCGGCGTTCCCACCTCCCGACCACCGGAGAGCCGGCGCCCCGCTCGCCCTCTTCTCTCCCTTCTCTCGGATCAAAGAAGCAGAGAAGAAGAAGAAGTAGAAGAGATATG…
TCONS_00104431	XLOC_054165	XLOC_054165	Chr8:10278089-10278659	nucleus	0.61	570	CCGGCTGCGGCGGCAACGTCAAGGCGATGCCTATAAGGTGTTCGATGAAATGGCGACAAAGGATGTAGAAATTTGGAGCTGAATAATTTAGCCAAACACTTTTTTACCTACCTCAGCTCCTAGAGGAGTCAGCTCTCACTGGAGTTGGAGTTTGGAGTTGGGAGTTGGAGTTAGAAGCTCTACCAAACGGGGCCTAAATTTGCACTAAACAATTCCAAATATGTTTCTGGCCAGGCTTTTATTTCATGCCAAAATTCCCTTCTCAAGCCAGGCTCAACAGCACCTCTTGGGCCATTTTTTTTTTGGGGGTTTAGCCTAACTAGGGCATTACTTGGGCTGGATAAGGCTAGATTTACATATATCAAGCACTGTTCCCCTAATCATCCATGTACCATTTTG…
TCONS_00104463	XLOC_054197	XLOC_054197	Chr8:19274398-19274624	cytoplasm	0.61	226	AAATATTTGACGCCGTTGACTTTTTAGCACATGTTTGACCGTTCGTCTTATTCAAAAAATTTAAGTAATTATTAATTCTTTTCCTATCATTTGATTCATTGTTAAATATATTTTTATGTAGGCATATAATTTTACATATTTCATAAAAGTTTTTGAATAAGACGAACGGTCAAACATGTGCTAAAAAGTCAACGGTGTCAAACATTTCGAAACGGAGGGAGTATCT
TCONS_00104473	XLOC_054207	XLOC_054207	Chr8:22098534-22099453	nucleus	0.53	919	CTTCGGCAAGAACTCCAAAATGACTCTGAAAAAGGGGTTGAAGCGAGGGTGAGTACAACGTACTCAGCAAGCTATTATATTAACCAACAATGAATGCATGAAATGGTAACTTCTGTGTAGAACTAGGTTTACTTGCAGAAAGCAGAGAATATTGAAGGAAAGTCTATAATGTTTTAAATGCAACAGTATTTAATAAAGTTTGAAATTATGTTCTAACCAAGATGCCATTGTGAGCCCCAATGCCCGATAACCGCGAGCACGGCTATTCGAATAGTTTTAATAATATTCATACTGCAGTAGATGTACGCTTTACCCGCAATCCATGACGTGCCAAACACATTAGCCTTGTCATGTCAAAGCTTTTCGGTTACTAACATCAGTGGTACCTGTTCCATGAAC…
TCONS_00110813	XLOC_057683	XLOC_057683	Chr9:10749197-10749600	cytoplasm	0.99	403	TTTACCAATTATAAAAGTTTAAGATGTTTTTGCCACAAATTTTCATACGTCGTCCCTGCTGTATCCGTATTAGTTCATCGCGTAGGCTGGCCAATGCACAAAAGAATCAGAGATGGATTCAAAATCCTAATCGCGTACGGCGGGCAAATCACAAAATCAAAGATAGATTAAAAGCCCAATCAAGCAATCATCCCTTTCAAATACAAGAACTACACCGACCAATAATCCCAGAAAAAGAAAAGGAATAAAATTCGCACAAATCCATTACTCATCAAGCAATTTCACTTTCACTTCAAGAACACAACATGAACACAAAAGATGAACAAAAGAACACACATGAACACAAGAGTTTTGCTTCCGCTCCCGTTCGCCGCCGCCGGGCCGTCGCCTTCCCTCCAC…
TCONS_00110847	XLOC_057717	XLOC_057717	Chr9:17653792-17654296	cytoplasm	0.9	504	ATCTCGACGGCGAGATCCGGTGGTGGCAGCTGGGTGCCAATGGTAGGTGGGCCCGGGGATCTTTTCGCGAGCTTGACGCGACGAGTACGGGACAAGGCTACAAAACGGTAAAGCGAGGAGAACTCGCGGTCGAGGAGGGGCAGAGAGATATTTGGCGAATTTTTGGTTGTGATTTCTCAACGGCTGCTGTTTCAGGAAGTTTGCTGGTTTCTGTTCTGTCAGTTGGATGGATGGCTGGACGGTGACCCTCGCAAGGAGCAAGTAGAAACCAATTTACGGCCGTAGAAAACAATTTACGGCGTCTGGTGAATGGGAATGTGGTTTGATTTTGATGGCACTTTCGTCTCACCTCTGTTTTCTTAGACCTGATTTGGACGGCCACCGTGCAGCACGTGTGAC…
TCONS_00110865	XLOC_057735	XLOC_057735	Chr9:22254986-22255227	cytoplasm	0.59	241	CTCATCCATAATCTTGGACTAATTCGCGAGACGAATCTATTGAGCCTAATTAATCCATGATTAGCCTATGTGATGCTACAGTAAACATTCTCTAATTATGGATTAATTAGGCTTAAAAAAATTGTCTCGTGAATTAGCTTTCATTTATGTAATTAGTTTTATAAGTAGTCTATATTTAATACTATAAATTAGTGTCTAAATATAGGGACTAAAGTTAAGTCCCTGGATCCAAACACCACAT
TCONS_00111006	XLOC_057831	XLOC_057831	ChrSy:541842-542150	cytoplasm	0.81	308	TGCCTAGTTAGAATGCATAAAATATAATGAACTTAGATTGGGACAGTACGGTAGAAATGGTTGATTTCCGGGTGGCTAGTACTGTTCCAACCGATATAAGACTGCCAAGTACATGTGAAGAACATATGAGTACGACCGCAATTCTCGTATGGGCATAGACCTAGCTGATTAAGTTATCTAGCAAAAGTGGTACCTCTGTATAGTGGTTCTTCTTAAGTCCTCGTGCAGGAGGCAAATTTATGCCGCGAAGGGCAATTGTGATATTTACCGAGGCGCAGGTAAATATATGAAATGAATTGTGCACAAAT
TCONS_00111133	XLOC_057928	XLOC_057928	ChrUn:616542-616950	cytoplasm	0.51	312	GTCAAAAACTCAGCAGAGTCCGCCAGGACAAAGATTTGCTGCTGGGACTTCGCAAGAATCTAGATAAATGGAGGGATACTATGAGTTAGCGATCCAACCGTGCCCTACTCTCAAGTCACAAAGCAGTAAGATGACCATCTCTGCTGTAATATTTATTGTGTATGATGTCGTAGATATGCTGGAAGCACTAATGATAATGGTGCATTGCTTCGCCCCACATATCGTGGTTTATTGTACAAGTTGAGCTACTTTGTTAAGTACTATTTGTGCTTGTAATTTTGCAAGTTTGCGGTACTTTTTTTTTTTGGAATA

## Sheet: Pokkali
Table S4: LncRNAs length distribution and their subcellular localization. LncRNA shared by both genotypes are high-lighted in red.
				Subcellular localization		Length
TCONs_ids	XLOC_Ids	Loc_Ids	Chr_pos	localization	Probability score	length (in bp)	Sequence
TCONS_00001080	XLOC_000467	LOC_Os01g11600	Chr1:6257576-6259954	cytoplasm	0.97	2262	TCGCACGGCAACTCCCACGACCGCCCGTTTGGCCCTAGCAACGGCTCGGATCTGCCCCTGGCGGATTATCTCAACCCCGGCCCCAAGTCTCCAACAACCGTTCTACACTTGGCGGCGGCAGAAGGGTGGGTCTGACGAGACGAGAGGCGTCGACTTCTCTCTCTCTGCCGGAAAGCGACTCCGCGAGACGCCGAGACAGCGTGGTGGTTTTCGTCGTCGTCGTCGTCGTCGGCTTCATATATCCCCTGGGATTCCGCTTCGGTTTCCACGCGCCAAAGCAAACGGGCAAAGGGAATTGAAGTAGCAGCAGCAGTGAATTGAAGTAAGAAGACAACGGGATGTGCTGCTGCGGTGGCGACTGCCGGCCGATCGGGTGGCTGCTCGGCCTCCCCTTCGCGC…
TCONS_00002911	XLOC_001451	XLOC_001451	Chr1:19102351-19106339	cytoplasm	0.98	3988	GCAGCCACCACGTATGCGCGCCGCCCTTTTCGTCCAATGGGAGAACGAAGCCGACGCCGTATTCCTCTTCCTCACGCCACTGTCGCCGTGCCTTCCTCGTCTTCCACCGGCGAACCGACCTTCATGAACCGACGTCCACCTCTTTTCGCCATCCGAGCCTTGAGCTCTTCTTCTTCTCTCTCTCCTCCCATGTCCGGCCGTCGCCGCCGACGGTCGATCTCCTCCCTCGTAGCTTCTCTATCCTTTCCCTTGCGCCACTATGATGGCGAATCCATTTTACCCCTTTACCCCTTCCCTTCCACCTTGAGTTAAGCCACCACCGCCACCTCCCAAACCGGCCGGGGCTAAGCTCTTGCCGCTGCTGTTCCGGCCATCCCTCTCTTCCTCTCTACCAACCAC…
TCONS_00005224	XLOC_002582	LOC_Os01g58310	Chr1:33698762-33700538	cytoplasm	1	1776	GAGAGAAGCGCGCTTAGAAAATTTGGTGACAAAGCTTGAGGATAACATCAACGAGACAACGAGGTTGTCCCCAGTAACAGGCAACGTATGCTAAACAAATGAAAAGTCACTAACCATGCATCCATCAATTAAGTTTCAGATCAACTCGTCTGTCAAGAGAGCAAAAGAAGACGAATTCTAGTCAAAAAGAGGGAAAGAACACGTTCAGTACCACAAAATCGCTAAATTAATTATTAAACACAGCCATTAATGTGCGAGGTACTGGTGGTGCATACTGGTCAAAATAATATGACCGGCCGGACGACCGGTCAACCCGATAAGGTGTGTATAAATACATGGCGCGCGCTGCAGCTTGGACAAGATACGTGCAGAGTTGGAATTTGGAAGGCGAGACGAAGA…
TCONS_00020581	XLOC_010356	XLOC_010356	Chr10:7889127-7889454	nucleus	0.76	327	TCAGGGTTAATAAAATCACATGGCCATAATATAGTCCCCTGGACTATCAATATAAGTATATTTACCTGCGCCTCGGTAAATATCATAATTGCCCTTCGCGGCATAAATTTGCCTCCTACGCGAGGACTTAAGAAGAACCACTATACAGAAGTACCACCTTTGCTAGATAACGTAGTCAGCTAGGTCTATGCCCATACGAGAATTGCGGTCGTACTCGTATGTTCTTCACATGTACTTGGCAGTCTTATGTCGGTTGGAACAGTACTAGCCACCCGGAAATCAACCATTTCTTCCGTACTGTTCCAATCTAAGTTCATTATATTTTAT
TCONS_00046718	XLOC_024018	LOC_Os02g53410	Chr2:32686076-32686828	cytoplasm	0.74	752	GACCAAACACACAAGCTTTGATCGATCTCTCCCACACGGCTCAAACGCGCATACACGTAAACACACAAGCTTTGATCCTTCTGTTCGCCATGGACGGCGAGGCGACGAGCTTGATGATCTCGCCGGAGATCCGCGACGCGGTGACGAAGGTTGCCGTGTTCGTGCTGGTGCAGGCGCTGGTCTACCTCATCCTCCGCAGCTCGTCGAGCGTCTTCTCCAAGGACGGCAAGCTGAGGTCGTCCATGAGCTTCCGGTCGATGCGGTCCATGAGCGTCAGGCGCTTCCTCGCGCCGCTCTCCGACGTCCCCGTCGGCACCGACGAGCCCTGGCCGTCGCCGTCGTCCTCGCCGTCGCCGACCTTGTCGCGCCGCTGGGCTAGCCGCCGCGAGGATTAATTGA…
TCONS_00068689	XLOC_034986	XLOC_034986	Chr4:29053703-29055784	cytoplasm	0.99	2081	CCGAGCTCTCTGAGCTCTCCTCTTCTCTCTCTCTCCCATGCTAGCCATCGGTTGATCTCCCTCACCGGAGCATTGCCGACCAAATACTCGCGCCAATAGCTTCGCCTCAATGAAGTGAATCCATTTTCCTACTTTCCCCTCTTCCCTACCCATTCCATGATCAAGCCACCACAGCTACCTCTTTTGCTGCCGGAGTTGAGCTCTTGCCCTCGCCGTTCCGGCCTCCTCTCTCAGTGCTTGTGTATGAAGCCACCCTCCCTAGATGCGCGTCGCTCGGGAACATCATCTGCCGCCGACGCTACCTTTCCCTGTCCACCGGAGCACCAGCGCCCTTCTCTCCCTCCTCTCAGTTCCCTGGCAAGAAGCAGAGAAGAGGATGATGGGAGGAAGAAGGACAAG…
TCONS_00068976	XLOC_035128	LOC_Os04g51680	Chr4:30615073-30616354	cytoplasm	0.54	1200	CTCGCCTCGCTATATATGCGGCCACTTCAACCCAAGCAACCACCAGCCTGGCCTATCTTCCTCGTCCTCTTCCTCCTCCTCCTCCTGCCTAGCCTATTTTGCTTTGGTCGATTGCTGCTGCTGTGGTGGTGGTGGACTGGTGGTGGCGGCTAGCGAGATAATAAGAGTGACTGGATAGGATGGCGACGACGGTGGCGGCGATGTGCGGGGCGGCGGAGGAGCGGGTGGTGGGGACGCACAAGGCGCCCGGGGCGTGCCCGCGGTGCGGCGGCGCGGTGGTGGCCACCGACGTCGAGAGCGAGCGCCGCATCCTCTGCCTCCCGCTCTGCGTCAAGAGCAAGCGCAAGTACTCCTGCTCCAGGTTCATTTGCCCTTGATTAATTAAGGATAATCCATCCT…
TCONS_00069419	XLOC_035287	XLOC_035287	Chr4:32619449-32620102	cytoplasm	0.91	568	ATAAACAGTAGGATGGCAGCATTTTCTCTGCCACCAGATAATCGATGAGTCATATTCCCAAATCACAAAACCATATGCTCAAAAAGGAGAAAGAGAAAAGGTGGAGAAGGCGTCCAGGTTCAATGCTACTAGGTTCCAGCTTTAGGAGGAGAGGAGAGATATTTGTAGTATAAGTAGCTTTGGAGAAGGTACATTCCTAAAGCCAAGATGCATCAAGAACTATTCTTCTTCAAGCTGTAGCCTGTAGGAGGAGGTTGCGTCAGATGGAGTTCCCCCATTCACTTCTGGTTCTTGTTTGCTTCTTCAGGTAGAGTTGATTTGGTTTTGATAATTTTCGTGTTCATGATTCATCGGGAGATGGATTTGTTTCTCAGTATCCTCATGTATGCTGTAGCTGGA…
TCONS_00070136	XLOC_035632	XLOC_035632	Chr4:22047972-22048337	nucleus	0.85	365	GAGGATCACATCACCTAGAAAAGGAAAAAGGCTTAATGCTATATATATAATCAGATCATTGCTAGTGAAGAATTTCCCCATGTGCCTATGCAATTTTGTTGCTGATCCATTAGGTAGACGACAATAATTTGAGTTGAATTGAACTGGAGAGAGAGAGAGAGAGGAAGGTGGTCCACCGTACAGTTTGCCAATAGGATGCAGACACGTTGGATCCAGCTTGGCATTTTTCTGGTTAGTTCCAGACTAGTCGGTAATGAACCGAGCCCAAATTCGCTAGAACACGTCGCGAAGGAGGCATAGAACAAACAAACAATCAAACCCCATCCCCCACCCCGAGTAATCGCCATGGATCACACGCACGCGCG
TCONS_00070200	XLOC_035696	XLOC_035696	Chr4:32623648-32624242	cytoplasm	0.59	594	AAGTTGATCACTTTGTCCAAGTAATGTTGGATTTTGTCTTACAAAATGCATTCATAATAAGTAAATATTTCATTGATGTTGTTTTTGCTGCTCCTACTGTTGTTGCTGTTGCTGCTACTATTGCTGCTAGTATGTTCTGGTACATAATTTATACTTACATATAGTTAGCGACTGCAAAAGTTAAAAAAAGGGCTTACATTTTGAGATGTGGGATGCTTTATCTTTTCTGTTACTTAATTGAAAGCATGTACAAGAGGTATCAGATATCAACGAGGAACATTTCACTTAAAAGTGATCTATTACCTCTATTATTTCCTGACCACTGTACAACATCTATATATTGAGGAGCGCATAGTATGTGTGTTTACCTCTTACTGTATAATAATTGACTGTATTCTA…
TCONS_00080053	XLOC_040912	XLOC_040912	Chr6:5489584-5490137	cytoplasm	0.75	424	CACCAGATCAGCCGAACGCCGCGGGCTAACGCGCGCCCACCACTACTCCGACCAGCTGCATGTACATGCAATATTACTGCTGCTTAATTTAAGTCATCAAGTAAATTAACCCAGCCCAGAAATGATCAAGTAGATAGAACGGAAGCAGATCCTCTAATTTAACTGCACATGCAGTTGAGTCACTGGCATATGGGTCCCACTTTACTATGGCCTACATGTCAGTGACTCAACTGCGCAGCAGTTAAATCAGAGGATCCCTTTTACACTAGCGTAGAGACCAAAGTTAAGGTCTACGGTGGAGTCAAGCAACCGGTGGTTGGGACTTGGGATTGATCAGTGATCATCATATCGGGTGGACCTGTGCGGGTCAACGTTAATTATTGTTCTTTCATTTGTTAT…
TCONS_00084929	XLOC_043574	XLOC_043574	Chr6:9895639-9901000	cytoplasm	0.99	5359	GCTATCTCTCTCTTTGTTCTCTCTCCTCCATGACCGGCCACCACCATTGCCACCGGCCGATCTCCTCTTCCACAGCCCTACATCCCAAACCCTCGCGCCATTGGCTTTGCCTCGGCGAGGTGAATCCGTTTTTCCCCTTTCCCCCTTCTCTCCCACCCCATAGCAACCACAACCGCCACCTCCTCTAACCAACCGAAGCAAGCTTTTACGCTAGCCGTTCCGGCCTCTTCCCTAACTCCCTCTGCCGGCCACCACCCTCCTCGGATGCGTGCTGCTCGGGAACACGCGTGGCCGCCGACGTCGCCACCCTCCAGTCACCGGAGCGCCGCCGCCCCCCTCGCCTTCTCCTTTCTCTTCTCTCGGCTCTCTCTGGAAGAGAAGAAGAAGAGACGGGAGGAA…
TCONS_00088393	XLOC_045515	XLOC_045515	Chr7:2175101-2177745	cytoplasm	0.97	1114	CCACAGCTCACTCAACTCGATCGACCATATACATATAGAAACACTTTCTTCTTCGTCTTCCTCGATAGCCAAAATACACTGTGCTTGGAGATCATCAATGGCGATAGCGAAGAGCGAGTGTGAGCGCCTTGCATGGGCATTGCTACTGGAGAGCAACCTCCTCGTCGGCAACCGTCGCAGCAACGGCGACGACGACGACGACGACGTCGATGTGGCTCCAGCTGCCTGATTTAATTACGGATATAATATGATTATTACTACTGATCATCTAGACTATATTATGATGAGTATAACGATCTCTACGTTAATAAGTTCTGCATGGTCTAAGAGTACTCATCTACATGCAAATATGCAGCACTTTCAATTAGTCCTGTAATAGGTGATCACTGTGGTGAGTGT…
TCONS_00093771	XLOC_048354	XLOC_048354	Chr7:9537201-9541906	nucleus	0.68	4705	GCTTGAAGCTCTTCCTCTCTCTCTGCTGTCAACTCCGGCCGACTCCGCCATCGGTCGATCTCCTCCCCTATAGCTTCCCTCCTAGTTTCCTTGCACCATCGGCTTTGCCTCCCTCCGGCGAACCCATTTTTCCTGTTTCCCCCTTCTTCCCCACCCCATAGCAACCACCACAACCACTTTCTTTGTAGCCGAAGAGAAGCTCTTCTACTTGCCGTTCCGGCCAACTTCCCCTCTCTCTCGGCCAGCCACCGACTTCCCCGGGTGTACGTCGCTCGGGAACACGCTTGGCCGCCGCCGTCGAGGCCGTTCCACCATCGGAGCACCGGCGCCCCTTCTCTCTTTCTCTCTGCTGTTACACGGGAAGAAGAGGAGGAGGAAGATGACGGGAGGAAGAAGAAA…
TCONS_00094026	XLOC_048525	XLOC_048525	Chr7:11714271-11718337	cytoplasm	0.95	4066	GCCGCCTATAAAAGGACGACGAGGTTCCCTCTTCCTCCCCACACAAACCGAGCTCCTCAAGCTCTCTCTTTCTCTCTCCATGTCCGGCCATCATTGCCATCGGCCGATCTCCCTCACCGGAGCTTCGCAAGCCAAAACCCTTGCGCCACCAACTCCGCCTCGTCGAGGTGATTCCATTTTTCCTATTTCCCCTCTCCTTTAGCCACTGCCACAAGCACTACCGGCACCACCATAGCCGGCCGGAGCTGAGCTCTTGCTGCCGCCGTTCTGGCCATTCTATTTACTCCCTATGCCTTCCACCGACGTCCCCGGATTTGTAGCTAGCGGGAACACGCTTGTCCGCCGCCGTAGAGGCCGTTCAACCACCGAAGCCCCGGCGCCCTGTCCCTCTTCCTCTCT…
TCONS_00096504	XLOC_049807	XLOC_049807	Chr7:9482055-9482581	cytoplasm	0.74	526	AGCACGGCTATTCGAATAGATTCATTTATACTTTACTGCAGTAAATGTACGCTTTACCCGCAGTCCACGACTTGCCAATATTCATTAGCTTAGTCGTAGCCCAGCCTTAGGTTATTAACAATAGAGGCACCTGTTCCATGAACTCTAGTCCCCATGCGCTCTGAACGTAACGTTATCAGCAGCGAGAGGAGTTCTGGCGTTCCCGAGGTTTTTAGAGAGAACTGGTTGAGAGACCCCCGTCATCTCAATCAGGTTTTTCACAATATACACACACAGCGATCACAATATAATCAAGATATTTACCTGCGCCTCGGTAAATATCACATTTGCCCTTCGCGGCATAAGTTTGCCTCCTTCGCGAGGACTTACATAAGAACCACTGTACAGAGGTACCACATT…
TCONS_00098405	XLOC_050893	XLOC_050893	Chr8:13481657-13484832	cytoplasm	0.83	3052	CAAATGGAGCTTCATCTCTCTCTTTCTCTCCCATGTCCGGCCATGACTGCCCCCGGCCGATCTCCCTCATTGGAGCTTCGCAAGCCAAACCCTTGCGCCACCAACTCCGCCTCGCCGAGGTGATTCCATTTTTCCCGTTTTCCCCTTTTCTTCCACCCCATAGCAGCCACCATCGCCACTTCTTTTAGTGGCCGGAGCAAGTTCTTGCAGCTGCCGTTCCAGCCATCCCTCTCTCTCCCTCCGCCAGCCACCACCCTCTCCGGATGCACGGTGCTCGGGAACACCATGCGCCGCCGGCGTCGCCGCCCTCCAGCCGCCGGAAAACCGGCACCCCTCCTCCCCTTCCTCTCTGTTCAACCGAAGGAGAGAACGAAGAGACGGGAAGAAGAAGAAGAAAAG…
TCONS_00010836	XLOC_005292	LOC_Os01g46440	Chr1:26419883-26423740	cytoplasm	0.79	904	ATGTCGACGAGAGGAGCTGACGAGACGACGAGGCACGGCCCGCCGCCGCCGCCGCCGGCGGTGGTGAAGATCATCGAGACGGTGCACATCGAGGCGGACAGCGCCGAGTTCAAGTCCATCGTGCAGAGGCTCACCGGGAAGGACGCGGTGGCCGGCGGACCGCGGCCAGATCGATCGTCAACTGGAAAGGCGGATGCCGATGAGGATCAGGCTCAGGGTTTTGCCAGGTAGTGCTCGTCTGCACGCAGAGAAGAGAAGTGATCCATTTTTATGTCGATCCGTCGATCACAGCTTGAAAGGTACTCCCTCCGTTTCGAAATGTTTGACACCGTTAATTTTTTAAGCACATGTTTGACCGTTCGTCTTATTCAAAAAATGAATAAATTTAAGTAATTATTA…
TCONS_00012344	XLOC_005930	XLOC_005930	Chr1:35201621-35205671	cytoplasm	1	4050	TTGCCCCATCCGAGCTTCGATCTCCCTCTCTCTCTCTCCACCATGAATGGTCACCACCAAGTCACTGGCCGATCTCCTCCCCCGTAGCCTCTCTTCCAATTCCCTTGCACCACTAGCTTCTCCTCACTCCGGCGAATCCATTTTACCCGTTTTCCCCTGCCTTTTCCTCTTGAATCCAGCCACACCGAAGCTCTCTTTCTCCTGACCGGACCACGCATTATCTTCGCCGTTCCGGCCATCTTACCCTTCATCTCTACCAGCCACCACCCCTCCTAGGAAGCAGGAAGGAAGAAGAAAACGAGAAAGGAGAAGACACTGACAGCGGGGCCCACTGCACAGTAACTTCCTTTTTCTTTTATTTGATTTTTAATCTTTAGGAGCCCATATCTCTCCAACCAT…
TCONS_00012580	XLOC_006019	XLOC_006019	Chr1:36307135-36311081	cytoplasm	0.97	1936	CCGTGAGCTCAGTCTCTCTCTCTCTCTCTTCTCATGTCAAACCACCACCGGCCATCGTCGATCTCCCTCACTGGAGTGTTTCTGGCCAAGCCCTTGCGCCATCGGGTTTGCCTCGACGAGGCGAACTCATTTTCCTAGTTTACCCTTCCTTTTCCCTTCCGAAACCAACCATCATAGCCACCTCCTTTGTTGCCGGAGCAAGCTCTTGCCGTCGCCGTTCCGGTCTCCTCCCTAACCTTCTCTATCGGCAACCACCCTCCCTAAGTGCGCGTTGCTCGGGAACGCGTTTTGCCGCCGGAGTCACAGTCTTCCATCCACCGGAGAGCCGGCGCCCCTTCTCTCCCTCCTCTCAACTCACTCGGCAACAGAAAAGAAGAAGAGAACGGGAGGAAGAAGAAG…
TCONS_00013984	XLOC_006592	XLOC_006592	Chr1:8557342-8557653	nucleus	0.55	311	GTTTGGCCTAAACAGTCAAAGAATAAGGAGTAAATTCCTTGTGTGCCCCTGAAAAGTTACCCAATCCCTTACATGCCCCTGAAACTTACTCGATTCCTTCTATACCCCTGAATTTTCGATTGGATCCCCTACATACCCCTACCGTTTGGGTTCCGTCAGATGTTTGTGTTCATGTGTGTGTTAGCTTGTCAGTATTTTCATAAAATGCGAAAATGCCCCTGTCAACCCTAGGTAACACAGGGCCACATCCGATCCCCAAATCCTCCAAAATAGTTCCCACACGCACGGTGCCGCACATCGCCAGCTTTCAG
TCONS_00014015	XLOC_006623	XLOC_006623	Chr1:12940430-12940679	cytoplasm	0.61	249	GCCACTCCCGTCAGTAGACCGTTAATTCTCAAGGAAAAAAGACGTATTTACCCTTCTGAGTATATTGCATGCCTAACAACTCAGAGAGGGCAAATATGTCTTTTTTACTTGAGAGTTAACGGTCAACACACGATCAACTGACGGTAGTGGCATGAGAGGATGCGCAAATTTGGACCAATGGCATATAAGGGAAGAGCCAATTTTTAGTGGCATATAAGGGATCAGACCAATTTTTAGTGGCATATATGG
TCONS_00014021	XLOC_006629	XLOC_006629	Chr1:15441526-15442240	nucleus	0.44	714	CGCAGGGCTTGAGTATCTTGGGGACGCTCGGGGTTTGCATTTTTTATTTCAGCCAAAATTTCGGTGATTTCGGTAGGATGAAATTTACAAAAATTTCATGATTTTCGGCACTTTTTAGATCAGAAATTATTAAAATTATAACATATTTTGACTGGATTTGAATAAACTTTGACCGAATTCAACAAACATTTGATAAAGTCCGAAAATTTTAATTGATATATTGATTTTGCTGGAGGGGTCCGAAATTAGAGAAATTTCGAACTGAAACTGCAATCACTGGCGACACTGCAGGTGAGAATCTTGGGGTCGCGAGCCACGGTGATGGCGATGAGGGGCGGAGAGAGCCCGAGCTCTTCGGCGAGGAATGCAAGCACGGCGTCGGGCCTGGAAGGTGACCTG…
TCONS_00014044	XLOC_006652	XLOC_006652	Chr1:20505252-20505694	nucleus	0.55	442	AGTCCAGAAACCTTCGAAAGAGTTTGAGTATGGCTCTAGTAGCTCTCCTTTCCTCTTTTGTAAGCTTTGTATGATGCGGACATCACTCCTTCAGATACACACAAAAATCCTCTAACGGTCATTCAAGGACCGATAACAAGAGCTCGCGCGCGACAATTGAATTTAGAGGTGAGCTTGTTCCTATGTTCTTCTTTGTACGAATTTGAGAATAGATTGCTACCTAATGATTATATTGTGATTAAGAACAATGTAGAGGACAAGGAGAAACTTGGAGAAGGACTTAGAGTCATGGAGGATCATCGAGGATGTCCAAGTCAAGGTGGAGGCCCAAACCAAGTCGACCTCGAGTGCAACTCGGAGTCCAGGACCAGTCTGCACTAAAACGGGCGCATAGGTCGC…
TCONS_00019521	XLOC_009885	LOC_Os10g33190	Chr10:17389720-17393970	nucleus	0.97	995	ACCCACCATCCCAGTACCGATCCAACCGAGGGAGGAAGCTCCAGCTCTCCCTCTCCACCTCTCTTTCGTCGCCGGCCGCCAAGAAGAGGGACATCGCCAACCGTCGTCGAGCCCTCTTCATCTCTAACTCATACTCGTTCCATTCTCATCTCACCATGACGAACAACTTTGGTTTTGATCCCATTCCATTTCATCTTCTACAGCAGCGGGAACGCCGCCATGTCATGGTCGCTCTAGAGCGCGCTCTGTGCACCGCCGCAGTGACATCATCGCCGTTCCCGCTTATCTGGACCAAGCCGGGCCAAGCTGTCGCGCCAGCGTCTTCGCCTCAACCTCCTCTCCATTTCCCCTCAAGAATCTCGAAGGATGGTGCTACGAGTGTGGAGATCGTCCACCGTC…
TCONS_00020593	XLOC_010368	XLOC_010368	Chr10:14454550-14454844	nucleus	0.62	294	ATGAGTTGCAACTTTGAAAGGTATGCGTCTGACGTTGAGTTGAGCTTGATCGTCATCGCTACTTAAGTGCCTCACCGAGGGGCAGCAAACGTATCGATCGATCATCGCACATTTTGATCTTCCATTCCTCAATCGCCTCCTCTCCGGCCTAATTCTCCTCCACCTCCTGTGATCTAATCTCTCCCCGTGTGTGTGCTTCTCTTCTCCCAAATTAATGGCAGCTTCGTCGTCGCTAGCCAAGAATCGCGACGTGATCAGCACCACCACCTCCGCCGCCCTCGTGATCGCCGCCGC
TCONS_00021583	XLOC_010847	LOC_Os11g10320	Chr11:5605242-5607269	cytoplasm	0.78	562	AGCTGTCTTCGCAGACAAAGCTTGCTAGCTCTACACACTCACAGAAGTTCAGAAATGGCTGCGAAGTTCCCAATTCTTCTTGGTGTCATATTGGCCACTCTCCTTCTCGTCTCCCACGATGTAGCGCATGCAGCAGAACAAGCGGGGCCATCGGAGCCACAACTTCCAGAGGGGTATGGTTCAGGCTATATGCAACCTGGGTACCGTGGTGCCTATACCGGAGGTGGTGGCAACGGTCAAAACGGTGGTGGTGGCAGTGGTTATTATCATAATCCTTGATGTGGATCAGTATTGCTATAGGTGGTGGTATGCAATAGACAACGCTATGTGTGTCTATCTAGCTATGAAATAAGGCATCGTTCATCAGCTTGAAAACACTTTCTATCTCTATGTGTTTTT…
TCONS_00025021	XLOC_012784	XLOC_012784	Chr11:3122967-3123763	cytoplasm	0.85	457	TCTTAGTTTGCGAAGCTAGCAAGTCTGGTGTCCTTGGACGCAATTAGTTGTTGTTTGATCGACCAATCGATCGAATACCGTCATCCGAGCAGCCCCCTTTTCTCCAAGCAACAACTAGCATTATAGCAATCAAGTATTTTGGCGGAAGAAGAAGAAAATGGGAGATAAGAAGTTTCTGTGAGTTTCTAGAAACTAGGGAAAGGGTTGGAGGTAGGAGGAAAGGAAGATCAAGTTAATTTCAAGCCTTCCCCGTTGCCATTCTGCATCTGTTGTTTGATCCCCTTAAAAAAACCGTTGTTGCTTTTGTTATCTGCCTTGGGCTAGCTTTAGTGAATTGTTGTAACGACCATTTGGGAGCCCATCCGGTCCTAACAATCCCCTCTCTTCGAAATTCAGCTT…
TCONS_00027219	XLOC_014043	LOC_Os11g35350	Chr11:20723803-20724619	exosome	0.93	816	AAACCAAAGCAAATACCATCACAGAGAGAGGTCGAGAGATGGCGACAAATAGGATGGCAGTGGCGATCATGGTGCAGTTGCTGGCAACGGCGGCGGCGGCGGCGGCGAAGTCGTCGGAGCCGGCCCTTACCGGCAGCAGTATCTCCGCCGCCGACGACGACCTGGCGTCGAAGGTGGGGATAAGGAGGCTCCTTCAGGACGGCGGCGACTGCATCCCTAACTACAATGTTTGCTGCAGCAACTGCGGCTGGCCGTTCGAACGGACCAATTGCTGCGACCCGGACAACTACGTGTGCCAGTACTGGCCGGAAATGGATCCAGCACATGGCCAGGACTGGTGCATTCCTCGCAATTACTGGAGTACTTCCTCCCCATAATGTTTGTTCAGTTTTATATCTT…
TCONS_00027548	XLOC_014252	XLOC_014252	Chr11:23796128-23796770	cytoplasm	0.46	539	CGCCGCGTTATGCAGGCACTGAAGGTGATCGATAAAATGCTTGCTCGATGGAACGACGGCACGGAGGTCACAACTAGGAGTTCAGCGGTTGTGGAGGGGCAATGACGTTGGATTTGCCAGTGCAGAAGGCCCCAGGTTAGTGCCTGCTCCCACATGGTTTGTAAATTGTAATTCGGATTCCAGGCAATCCATTGAGTTGTGCAACGGCATTTCACTCTTCCATTTGCAATTGACATTGTTATCTAGATTTTTTAGCTTTTCGTAAAACTCATCCAGCTCGCTTGAGTTGTGCTGCTAGGCAAGCTTCCTGAATCTTAAGAGAATTTTGCGCATGTATTGAACTTCCAGGTCCCTATTCAGCTCAAATTGACATTCTGGACATTGGACCTCCTTGCCTCG…
TCONS_00028183	XLOC_014648	XLOC_014648	Chr11:8031643-8031847	cytoplasm	0.54	204	AGCAACTATAAATAACGTCTAGCTGAACCAATCCAATATATAAGGTCCATGCTAGTCAAATTATAACCCATAGGAAAATAAAGTCATCTTCGGCCATAATTAAATGGGAAAGGCTCACCACCCGATGACATTCTAAAATAATGCATAAGTTGAAATAAAACATTAGCTTTAAACGGGTTCAACATGCTCAAAGGGTTGTTTGGG
TCONS_00028201	XLOC_014666	XLOC_014666	Chr11:15234952-15235578	cytoplasm	0.56	626	CTCCATTCACCATAATGAGATTTTTACAAAATGGTATGTCTGTTACATCTCCATACTGACATTATACCAAAAAAATGCACATGAACTAAGATTTTTTACACAATCCAACTTTTCTTTCTCCAAATATAACAAGGTCAGAAATTAGCATCACTAATCACTGATCCGGAATCAAGAATCCCAGCTCACTTGCTCTGCCATCTTAATCAGTCGCTCCAGATTCCTGCTCACGCAGAAAGTAGGAACGCGGCCACCACATGCCTCACCTCATGGCCGCCTCGACGCGTGCCCTCACCATCGCAGCCACCTCGCTGCTTGCCGTGCCAGTGCTACATGGTAAAAACGCCAGCCTGCTCCTCCTCCCTTCTGGCTTGGGAGCTCAACCGCGCCAGCCGCCAATCC…
TCONS_00028214	XLOC_014679	XLOC_014679	Chr11:19414377-19414924	cytoplasm	0.85	547	ATAAATCGTGGTATCCATAGGTTGTGAAGAAACTTTAATTAGCTATGCTTTGCAAGATACATGAAAAATATCAGTAGGTTTTTCAATGGCTCTGTCACATGTATGGTTCCAAGTTCACTGCAACTGCAAGTGATTTGATCTGTGCAGCTATCAAATGTTTCTTAAGCATGATTTCTCTTTTTTGTTGACTTTGTTTAGCTAGAGAGTTCCTCATTTAGCTGTTGCATAGATTCTGCTGGTTGATTATAAGGTCAGGGTATAAGGCATGATGGATAAAATGAGCTAGGGATTTTGTTGCTGAACAGTCATAAGACATGATGGATAAACATTTTTTGCTGGTTAGCAGCTTGTGATACTGTTATCTCATAAGTCATATCTTAACTAGTGAGTTTCACATTT…
TCONS_00035405	XLOC_018755	XLOC_018755	Chr12:2624902-2625650	cytoplasm	0.73	748	TCTGGGGTGAGGTTACATCGCCGCATGGCGGCTTACAAGAGATATATATATATGGTGGAACCCTAAAAGGGATGATGATCCGTACGGGAGACGGGCCTCCGCTCCACTACGGAAGCTGGCCTTTATTAAGTGCAGATGAATTTCGATCACAACTCAACAGCATCGACCAAATATTCTCCCCGAAGTTTCCTCTTGCACCACAATTAATTAACTAATGGTTTCGCTTTCAATCATTTTTCATTCTTTTGGTTTGCTTTGGACCCTAGCTGTTGTTGTTGTTGCTACTTCCCTAGCTCGTTGTCCCCTCTCTCCTCTGATGGTGAGTTAGCTCCAAGATCTAATCATCGATCAAGGCATCCTGCATAAGGTAATGGGGACCTGAACCCTGATCCTTGATGG…
TCONS_00035434	XLOC_018784	XLOC_018784	Chr12:8402969-8403177	cytoplasm	0.55	208	TGTATATCGGTTAGTCGTGAGGCAATGTATGCAGCTTCCAGGAGGTGAAGGTTGATCAAGATTATATCAAGAATAAGAACTATCCTGAGCAGGCAAGTCATCACCCCATCCCTTGAGCATGTTGATCCCAATTGTGAAATTGTTTTGTTTACAAATAAAATTGCATGCAGTGATGAAATCCTACTTGTTATTATGCCATGCCTTTGAT
TCONS_00035476	XLOC_018826	XLOC_018826	Chr12:17565452-17565879	cytoplasm	0.96	427	GAATAGAATCAGTTACCAATCCACTTTACACATGTTTATAGCTTAATGATAGTCCACATCAAAACGCAATTACATGAAGCACACACAAGCGACATCTGCATAGCTATGGGGATTGTGGACACCTTGCCAGTTACCACCATGAAAATCTCATCTGAACCATGCTCAAAGCATCGCATTATTTCGTGAAATTAGTGAACATGCAGTTGGTCATTGGTTCAAACATTTCTACTCAATGCCTAGAAGTTTGAAGGGATCGAACAAAACCTCAACAGCAAAGAACATGAGCAAATCCTCCTAAACACGCAGCATCCTTAAGATTCCTAATCGTCCCCAAACGAAACCACATAACACTAAAAGCGTAAATGAAATGCCATTGTTCACCAATCCGGAGATCGGCCT…
TCONS_00035491	XLOC_018841	XLOC_018841	Chr12:20902926-20903325	cytoplasm	0.72	399	CTTGGGGCCAAAGGTCCTGTGTTTTTCAGTTTTACACTGTAGAGTTTACACCTTCACTATTATATGAAATTAGCAGCCCACTGATTCGTTAAAAAAAAGAATTGTGACTTTTTAGATACTCAATAATAAAGAAAATACGTGGAGGAACAGTACGTGCAATAAGGTGTACATGCTAATTATAAGCAGGGATACAAAGTAGTAGTACTAGTTGCTTATAAACAAGATTAATATATTTAAGCAGAAACTAAAGCGCATCCTGCGTGATTATTTAACTCCGAGAAGTAGCAGAAGCTCAGGTAATCAGCAAGAGCTGGATTGATCAGAGAGAAAAGATTCAGAGGCGCTCCAGCTGCGGGTTGTACACGTCCGCGGGCTGCGGCACCTGCTCGTGCGGCAGCG
TCONS_00035493	XLOC_018843	XLOC_018843	Chr12:22584458-22585070	cytoplasm	0.94	612	CGTTTACACCTCCTGTTTAGCATTTCGTCGTTGCCAATTTCCTGCAGCAAGAGCATATGATTCCATACAGATTCTCCTACTAAAAACGTCACACCATTTTAAGAAAACGTCACTAGCTGATGATGTGCAAACGAATTAAATTAAGTCAGAATATACGGATAATCCCACAAGTCAAGACATGTGATTCAGTGTACACCCAAGTCTTCACAAATTTCCACATCAGACAGGTTCAGAAAGTGCAACAAACAATTATTTTGCCTCAACTGAACTCTGATGGACTGATGAGCAGTTGCATTGCTAACTGTAACGAATGATATAGGGTGTGTTTAGTTCTTTGGTCGTAAAGTTTTTGAAGTATACGGACACACATTTGAAGTATTAAATATAGACTAATAACAA…
TCONS_00035503	XLOC_018853	XLOC_018853	Chr12:24462348-24462888	cytoplasm	0.81	540	GGTGGTTAATTACCATCGTGCCCTCGCGCGTCTGGAGCAGTCGGATGGAGATCGGACGGTGTACATGGGTTGACTTTTTTTATAGGGTTGTTGATATTTCCTTGGACGGCTGCGATCGGATTGGCGGCTACGCGGCCACAAGGACGGTGAGGGTATTTCAGTCATATCATCATCGTCTGCCGCTGCTCTTTAATTGGGCTGGTGACTGTAGATTTTAAGCCCAATTTGGGATGAGCATATTATGGGCCTATTTGAGAAGCCCAGATATTTTAACAGGTTTTGTACTAATGGGCCAAAAGCCCATCATTTGTACTGGATCAGTGTGCTTTTGAGCCCCTTTCTTTCGGGCCCATGTAGTTGAACAATGGACCAGTGATGGCCCCGTACCACTTGGAATTT…
TCONS_00038079	XLOC_020111	XLOC_020111	Chr2:16336810-16337392	cytoplasm	0.85	231	CAAAAATTGGTGACCTGCTGATTGATGTTTCTAACTTTCCCTCAATCAGCTTGGCCATATTGTTTTCTAAGCTTTGCGAGTAGCTCAAATGAAGGCCATGGTGATCTGCTTGAGCAACATGGCAATAGTGGCTGGTACAAGATAGATAGAAAAGATGATGGTGAAAATTGGTACAAAAGCTACATGCCTACATGTTCGACGAAATACTTCGGTATCCCCGCTGTCCTAACA
TCONS_00043908	XLOC_022714	LOC_Os02g26380	Chr2:15489942-15493874	cytoplasm	1	3750	CGGAGACCAGTTGCTTTGAGATTCGTTTCTAACACGTGCCATGCAGGGAACCGTGGTCCTTCGGAGGAGCAAAGGACCAAAGGCCTCGTGCAATTTTGCTTTATATAGGATCCGCAATGTATAATACCCTTTACTTTAAGGTACTAACATCTCTACCACATGTGCAAACATCTCATTTAAAAAAATTTCACAGTGTAGCATCTCTCTTGGCAAATGCGTGTCTCTGGGTCGTTCCCTCGCCGACGGACGTCCGCTTTTCCGTCCGCGCCGGCTCCCCACGATGGAGCGTGTCCCCCGGCTGAGGGACGCGTCTCTCGCCACTTTTCGGCCGAGCGACGCAGCCAAGAGACGTATTGGGGGGCGACGGGCTCATGTGGATATCGATTCCCCAGCTCGTAT…
TCONS_00047459	XLOC_024362	XLOC_024362	Chr2:20114866-20115079	cytoplasm	0.52	213	CTTCACTAAAATTAGACCATAACTCCTTTAGTAAAACCCTTTGATCAGCATGTTAAACATAATGCACTCTACCACTATATGAAATTACTTAATCTAATTCAAAATATAACCACATGAAATGACATATATAAGTTAAACAGTACATAGAGATGCAATTTTTTTTTTATTTTATTTTTTTGATATTTTTTTCACACTTAGGAGAACATAGGAACC
TCONS_00047465	XLOC_024368	XLOC_024368	Chr2:21645755-21646316	nucleus	0.5	561	GTAACACTTCGTCTCCTCATCCTTGGCATTCCACAACCATTGGCACACCAACTCTCATGTGAAAACAATTTACTAAGCCAGAGGCATCCCATAAATACCCTTGTGGTCGCACTGTAACGTGTTCGGATGGATTTCCCAAAGGAATCGGTCCTTAACGATAATACGTAGCCAAACCACAAAGGCATGACTCCGCATCATCACCACTTTCACAACACATTTTATTTCACAACTCCTCGGTACAACGTACCGGATTTTTAAACATGTAATTTGGAATAACCCAAGTTTCCCACACGGCAACAACGTAAGCATGGCTAAGCGAAACTACCTCGGTAATCGTATAACGATACCGGCGCAAATATTTGTGGAGCTATCAAAGGTATGGAAACATCAACCTATGAA…
TCONS_00048089	XLOC_024683	LOC_Os03g05220	Chr3:2530745-2533867	cytoplasm	0.98	2687	CCGGTATCAGATAGAGCTCTAATCTGTTGTAATTGTAATCTAATCATATTAAATCCTTAGTTTTTGTAACCAAGCTCTCGATCAACCACAGCGCAGCTTTGCCCTGCTACAGGGTAACAGTAGCTGGCTGCATGTGCGTCGTCCGATTCGGTGCTCTCATCCTATCAGAGCCATTCGTTCCCCCATCACCTCCCCCGTTGCTACTCTGGCACCCTAATCCCTCTCATCTTCCCACGAGCCGCCGCCACCTTGGCTACTCGCCGTTTTCCCCTCCCAAAAATCCTCCGCCGCCTGCTCATGGTCTCATGGAGCCTGTGGTCAGCCGCCGCCTTCCCCTCGAGCTTGAGAAGCCGGAGCCGCTGCCTTCCTCTCAAGCTCGCTGAACCAGCCGTCGCTGAC…
TCONS_00059755	XLOC_030045	XLOC_030045	Chr3:4007979-4008588	cytoplasm	0.93	609	AAAATGCTGGGGAAACGTGGGAACAGTCATCTTCTTATTGCAAGAAGAGCCTAGAACATTAGCCTGATTGTGGAACCAAAACATTATATAGCTTTCTGTTTAATGTATCTATACCAATCAAGACTAGTAGTATAGTCATCAGTTATGTGGTGCCTGCCAATTTTCAGGAGATGAAGAACAAAGGTGATAGATAGTAATACTACTAGTAGCATGGTAATCATGGGCTATGCCGGCATTCTTTTTCATGAGATGAAGAACAAGGTGGTTGATAGAAGACCAAATGCTCAAAACCAGCACCAATAACGGTGCTAGGTGACAGAACCTGGGGACTATATGGAAGTTCTTTTCATTCTTTTGCTTCTCGTCCTTGTTGGCGCAACGGTGTTCACTCCTTAGTGT…
TCONS_00059773	XLOC_030063	XLOC_030063	Chr3:5692888-5693275	cytoplasm	0.93	387	CAGCAATTATGTTTATTTCTCTGGATATCCAGAAAACCTTCAGAAGATGATTTGGAATTGTTGTCGTGATTTGGCTCCATAATGGCCGAAGACTCCAATGGCCAGGTTGCTCACTGAAATTCCTTGTCTTCACCTCGTCTGCAATTGTAGCGCTGTCTGTAAGGAAATTAGTACCTGCAAAATTCAAAAAGAAGGCAATTTCCAAAGCCAGTTGCAAAGCAATCAATTCGGCTTGCAAGGGAGATTGAGCTGAGTTAGTGGAAGCCTTGATAAAAAGAGCATTATGGGTGGAAGGGAAATGAAAGAAAATTCCAATTCCAGTAACATGATCCTCCCATGAAGCATCTACGTAACATCTATTGCCTTGAGGAATTCGATCCATCTTTC
TCONS_00059785	XLOC_030075	XLOC_030075	Chr3:8933071-8933747	nucleus	0.74	676	TCGGCCGAAATAATATCATATCAGAGAGACCCCTAACTATCGTATGCCTCGGTCCCCTTCCGGGAGTTAACCACCCTAGCGGCCTAGCACATGAATCAATATCCGTTTTTACATACAAACATACTATTGGTCTAAATAAAATATATTAGGTGTTTATATACATTTTGTTAACAAGTAATCCAGTATTTGAATCTGGAGGAATTACTTAACCCGCACGCTAAAAATGTGAAAATAACCAACTCGGACCACACTGCTATCGTGATATATCTGTCCTTTCTGGCGTCAACGCCGTCCATGCATGCTGTAAATTGTACTACAAAATCGACACACCTTACAAGGTTACACCTGCCTGCTACTGCTAGTACGATGCACGGAACTTGTGCGGGCCGGGAACTAAAT…
TCONS_00059841	XLOC_030131	XLOC_030131	Chr3:19125510-19125753	cytoplasm	0.6	243	GTCACTTATGGCACATGCTTAGTAATGCTAATTTAGATTCATGCATTCTCATATTTATCAAATGCTTTATGCTTGGGCAACTACCTTGGGGAAGGTAGTTGAGATACAGCATGTGGAGACATGAGCGCCACATTGCCATGACATTGATGAGATGATTTGTGAAAGAAAGTTAAAACTAAACAAATGTTTTCGACTGGGGCGGCTGGAGGACTTGGGTGGTGTCCGGTAAAGGCTAGTGCCGTC
TCONS_00059842	XLOC_030132	XLOC_030132	Chr3:19213878-19215897	cytoplasm	0.76	2019	AGAATGCAGACTCTTTGTCTAGTCCTGAATGAAAATGTGGCAGCAGCACATGGTCGGGTATAGACAAGGTTGGGCCAGATTGTACTAGGTTAGTGAATCTGGACCAGGCTGCACCAATTGATTCTTTATTTATCTGCTGGAAACTCAGAATTTCTATCCGCAGAGTAGTGACATGGGTTACCGGAAAGAAGGCAAAGCATAATCTGTCTCGCAGCTTTTCCTAGTCACCGTTCACACATCCGATGGTAGATGTGTGTCGGGTCCCAAAACTAATGATTCGGTAACCAACATGTTTAGACTGTATCAAGCCCTGGATCAGTAGATTGATATAGGTTCAACAACCTGGATCTTCATTGCATACATTTTGACAAGGCTCCAAAGGAGATTTCTTTATATAAA…
TCONS_00059900	XLOC_030190	XLOC_030190	Chr3:33794195-33794624	nucleus	0.61	429	CACGGGTGGATGACTGGATGGTGAACAAGAATACTAAAAGGCACGCGAGGAGATGGGCCGTGGAATGCGTTATGCGTAGCGCGTTGAGGTGAAGAGTATCGCCAGCGGAACGTGATTCAATCTATGTTATTACAATACAACTTCCAAATCTAGATAAGTCTTACAATATGAAACAGAAGAATTAGCTACTTTAGAATGAAATAGAAGGGTTCTATTTACTTAATTTATTATATTTTGGATCGAGTTTAAATTTTATGTAAGTGTTTAAATTTATACGGAGAGATACACACTAACACACGTAGTGAAAATAAAAGGCTATAGCTAAAGTTTTATTTTTACCGGTTCCTAGACACCACCCTCGTACGTATACGCTCTCCGTCCGTCCGATGTGTTGCGCTC…
TCONS_00059903	XLOC_030193	XLOC_030193	Chr3:33883429-33883751	cytoplasm	0.58	322	TAAAGTAGATGTAGTTTATAATCACTTTCATCTTATTTGTGTTTGCTATGTATAATCATGCTTGAGATGAAAGTGTGAATCTAGTGCACATCCTGGGAATTAGATTCACATGAGTATGAGTTAAGAATATTTGAGATGTTGTAGATCTTAAGCCATTTTTGTCAAGTCTCCTAAATGTGTAACATATCTGGTCACCGCCTTCGAGTGGTTTAACGGGCACATCTCAGGCTGAAGTTGACTGGCAGGCTAAAGGCCCAACAATATCTCCAATATTACTCTCTCGAGGCGTCGGATATTTCATTATGCTTGTTTGATGACTTGA
TCONS_00060546	XLOC_030606	LOC_Os04g11030	Chr4:5986671-5987382	cytoplasm	0.97	711	ACAAGAGAACCATTAGTCAAACCAAATTACCAACAAAGTACACCTCTCCCTTGCTAGGGTTTGTTCCCTCTCCCAATCTCCAAAGTGTCATTTCACATTGACTTCATTCTTCTTCCCAGATCCCCCAATTTCTCCCTTTCACCATGAAGCTTCTCCCTCTTCTCATCCTCGCAATGGTCATGGCCAACGCCTTCGGCGCCGTCACTTCTCGCACGGCGCCGGGGGAGGAGGCGCTGCTGGCGCACGGCGTGGTGAAGACGACGACGGCGGAGGGGACGTCCATCGACAACCACCACGCGATACCGCGGCCGGAGTACGACAGCTGGAGCAGCCCGGGGAACATGCCGGGGAGTGGCCATGACATTGGGAGCGAACAAGCTCAGCCATGATCGAGCTAGA…
TCONS_00065403	XLOC_033278	LOC_Os04g10940	Chr4:5931173-5931871	cytoplasm	0.88	583	TAACACTATACTTCTTTTCGAGCATATGATACTAAGCAAAATCATGAGCACTGCACGAGCAAATCTTGCCGCGCTGTCGATCATGGCACTGCTCTTCTTAGGAATTGTGATTGGTGATGCGGCTAGAGAGACTCCGGGAACATATTTTTCTCTTGGTAGAATGGATGGTCATAATCCTACAGTGGCTTATGGTGCAAATACTCACTCAGACAGTGGGGATATGAACAAAGGAGAGAACTCAATTGCAGGTCATTCTAGTGAAAGAAAACTAGGGACCACTACAGATGGAGCACGTTTTGAAACCCTTAGTTGGTATTGCAGTTATATCGGGAAAAAATGTCTGTAGAATATATGTATATCTAGCCAGTCCAGTCCTAGAGTAATAAGTGTGGCAGCTTT…
TCONS_00067186	XLOC_034366	XLOC_034366	Chr4:21137276-21139660	nucleus	0.55	786	AAATACACAAGCATGCAAGAACTGACGAACAGGCACCCAATCGTGATTCGCCGATGAAATCGAACCCCCATCCAGCTGTTCGAGATCAGTTAGAACAGCGAAGCACCTGCGTGCATCGTCCACCACCGGCGACGCTGCACTGACGTTAACAAAAGGTAGAGTACAGGGAGAACGCTGCTTGCTCAGCATGTTATACGGCACTGCACATCTACATTTTCCTGACTAGTTGATGAGAAAATGAGGCCCCCAAACTCCCGACGCCTCTCATGCCTGACTAGCTTGAGAGAAATATATCTATGCCACATTTGCAGGAGATGCATGCAGATTGTTGAGTTGCTGTGACTTGTGAGTACACTTGCATTTCTGAACATCTTGAATTGGCTGTTTGTTTAGGACTGA…
TCONS_00070133	XLOC_035629	XLOC_035629	Chr4:21743647-21744777	cytoplasm	0.98	1130	CCGGGGATGTAGGCTTTTGCTGAACCTCGTTAACAAATATCGTGTGTTCCTGTGTCGTCATCTGGTATGTCTTGGGTGATCAATGACTGAAGCGATCGGGAAGGTTAGTCGTCGTTCCGCTTTATCGACTAATTTTTGTAACAGGGCCAACGAGTGACCTTTTATAAATCAACTCTATGCAGATCCACTCCCCCATGGTTCAGGCCTTAACTCGTGCTGAGATCCCTACCGTGCACACGAGGGGCACCATAGGTCATTTCTTAACGTGTGTATAACCAAGGGGACATCGAGTGATTTTTTTTAAAACCAACTCTGGAAATTCGCTTCTGAGAGGACTCGAACCCAGGCGCGCTGGTGTGTGCAACTAGAGTGTTACAACCATAAACCATAGGCTACAGA…
TCONS_00070178	XLOC_035674	XLOC_035674	Chr4:27343915-27344380	cytoplasm	0.95	465	GGCAAACCTACCCCAACGCACTGGTGGGTTTCCTCCATGACATTTGGGCCCAACATTGTGCGGTCCCACGAGTTTACTTCAGGTTGGGTAAGGAGATGGGTAACATTGGAGGAGGCAAAAGAACTTGCTCGAACTGCAGTTTGTGGTCCTAGAGCAGGGAGGTCACGTGATAGCGGAGCACTTTTGAGAGTGGTCTGGTTTGGGCTTTCGGCCTTTTTTTGATAAGCCCATCAAGGCGAAGGCCCAGAAAGATCTAGAACTACATTGGCCCAACTTTGATGTGAGCCTACTACCCCACTTTGCAAAATGTCCAACAATTTTAATGATATGATGATTGGTCGGCCAGGCACCGAGCGAGTTGCCAAGACAGAATGTCTGTTTTGTTTATGCAAAACAAAA…
TCONS_00070198	XLOC_035694	XLOC_035694	Chr4:31807275-31808022	cytoplasm	0.95	747	AAAAAGGGGAAAGAAAAAAAAGGTGAAGAAGGCGTCCAGGTTCAATGTATGCGATCCTTGGCATTGCAAGGACAATCTTTCAGACCCACCAGCTGACCACTTTCAAAGCATGTCCAAATAGCAGGCTAGGTTCCAGCTTTAGGAGGAGGGGAGAGATATTTGCAGTATAAGTAGCTTTGGAGAAGGAACATTCCTAAAGCCAAGATGCATCAAGAACTGTTCTTCTTCAAGCTGTAGCCTGTAGGAGCGGTTGCGTCAGATGGAGTTCCCCCATTCTTCACTTCTGGTTCTTGTTTGCTTCTTCAGGTAGAGCTGGTTTGGTTTTGGTGATTTTCGTGTTCATGATTCATGGAGAGATGGATTTGTTTCTCAGTATCCTTATGTATGTTGTAGCTGGAT…
TCONS_00070201	XLOC_035697	XLOC_035697	Chr4:32624667-32624956	nucleus	0.47	289	GGCCGGGCCATTGTGCCTTGGGCCGGCCCAGGAAAGCATGGCCTAAGGCCCAGCTCTATGTTACTAGTAGGATCTAGCCGTCAGATCAACTGGATTGAAGCACGGGAAGCGTGAAATTTTGATATGAATGGGTTCCCGTCATACAGTTGGCGAAGCAAGAAAAGTCAGAGAAGATGTACAATATACAACTTCAAACTGAAAAATGAAGAATTTCCGTATGTTGTCTCGCAACACAATCTCACTGCAGCAAACAATATCTTCGATTATACTCCCTCCATTCTAAAATATA
TCONS_00074053	XLOC_037804	LOC_Os05g47730	Chr5:27345453-27357619	cytoplasm	0.93	1760	GTAAACTCTACAGAGGCACGCCTCATGAGACTTTCCTTGATCAGCTATAGCTTCATCGGTCTGAACCCACTCATGATGAACTCTCTGAAACTCTCCCCGTTCCACTAACACCACCCACTAACATCATCATAAAATGTTTTGCTCCGCTCGTACACGCAAAGAGACGAACACGTCGCCGCGCCCGAGCTCACGGTGCGCCTCACCTACTGCAAACCTCTGCAAATGCCTATAAATACACCGACGAGGCAGCGATCACTCTCCATTCACAGCAACAGCACATCTCGCAGCTTAATTTCAGCTTACTGATCAGTGATCACTGAGCTAGCTGAGACAAGTTTTTGAGTATGGCAGCGAAGGCATCTGCAGTGTTCGTCCTGCTGGTGGTGGTGCTCGCGGTGG…
TCONS_00074417	XLOC_037957	LOC_Os05g50815	Chr5:29146444-29149543	cytoplasm	0.86	1804	GTCAATTTAATATATTTGAATAATACATTGAGAAAACATATATGCTATTATATGAGAGAAAATATAATGATGCTAGCCGCGCAATCTGTGTGGGCCACCATGCTAGTTACATAAATAAGAGATAATTCGCGAGATATTTTACATCCGTGCTCGTTGCCTCCCCCATCGGATGGCTTAAATCCATTTGGCAAAAAAGGTTGTGTTCGATCCCCAACCGCGATGTGCTAGGGTTTGGAGGCCCGGTGTTCAATCCCATCTTCCCTCCGTGCAGCCGCTAGGATCAGTTTTATCTTCTTTCTTTCTTTCTTTCCGTGTCATTGTTATTAGATTAGATTCTAAGTTCCCTGTTGAGATTCCTTGCTGCTCATGGGGGCCTGCCGAAAACTACCTCACCTGATT…
TCONS_00076259	XLOC_038992	LOC_Os05g22930	Chr5:13056934-13078101	cytoplasm	0.51	1241	GCCTCTCTCTCTCTTCGTCCCCGTCCCGCTCCTCTCCGTCCTTTTCTGGACGGACTCGCCTCGGCGGCCGCAGCCAGCCACAGCCGCCGCTTACTTGAGATTGAGATTGTTGCCATCCCGTTGCCGATGGCGGCGATGCTCGCGCCGGCCGCGCTCCCGCCCCGAGGTTTACAGAGTTGGAAATGCGGAGTCGCAGTTGTTGCTACATGGAAAAGGTTGCATAGTGGCCGACGCAATGCTGTCAGAATATTTGCAGCAAAGAGTAATGAAAGGAGGAGGAAATCACAAAGTATATCTCAAGGTCCAACATTTATAAGTGAAGAAGCTTCTTCTTCAGGCAGTGGCGAAAACCCCACCACCAGCCTTGAGGTCAATGCCAATGATGTTACTACTGACGAG…
TCONS_00078951	XLOC_040333	XLOC_040333	Chr5:5230430-5231329	cytoplasm	0.98	899	AAATAAAACAGTAGTCTATGAAACTAAAGTCACAAGTTAAGGTCTTGGAAAGCAATCAAGAGAATGAGAGGCCACACCTTTTGTTTTGGGCATGTGTTTTTTTTCCTTTTTGCTAATCAATAACTTTCAAGCATGATGACATGTCTTGCTGATTTGTATACAGGGAAGGAACAAAAGAGCTAGGGAGCCGACAGAAGAGAGTGAGCATATATAGTTCTTTCCTTGCATATGTGGTCATATGTGTGTTGACTGAAGAGATACATATATATAGAGAGAGAGAGTTCATGTGCTTGAAGCTATATGTGCTCACTTCTCTTTCTGTCAGCAAATTATCTCCCTCCCTCTCTCCCTAATATATACGCATGGGTGCATACAACGCAAATATATATATATATATAT…
TCONS_00078963	XLOC_040345	XLOC_040345	Chr5:6780700-6781136	cytoplasm	0.97	436	CATATATATTCTACCTAGTTTGGAAAAGGGTAGCTAGATAATTAGATAGGAGAGAACAAGAAAAGAATTTATTCTGCCATGCTCTAGCCTGGCAAGAATTGGAGGGGGACCAAGGTCTAAGGACCAAAGCTTAATTAGCTTCTCAACAACACATTTGCACCTAATAAAAAGCCTCCAAGAGCAGCTGGAAGGCTTGTCAAGCATGCAGTGAGACTACTTCTGAAGCAAACCTACAAAAGACTAAAGAGAGAGAGGCCCATAGCATCAAGGCATGCATGCAGAACAGGAATAGTGCCTAGATGATCAGTGTGCTCCACCATTGTAGCTCATGGCCAGTATTGCAGCTTGCATGTGGTGTTGTTGTCCATGATCACTGTATACCGTTGGATATCGCTGTGA…
TCONS_00079037	XLOC_040419	XLOC_040419	Chr5:26340183-26341001	cytoplasm	0.58	818	CACGCGATGAAATTTCCACCGGGATGAGGTGAAAAATCTGGCATTGGAACGGTCGCCGAGTTCACACGCGGTACTGTGGAGGTGCGGAGACTGATGACCTGGTTTCTCATCAGTCATGCATGCAGAATGCAGAACAGGATGGCGTTTTTGGCTGGCTCCTGAATGTTTGATGGTGATCAACTACAGTAATTCAAATGATGTATGTACAGTGGGTGACAGGTTTGTTAGATGTTTTCTTGTCCATCGATGCGACACAAAGATGGCATCTGGTGGATCATTACTTCGTGGTTAGCTTCGGGGCTGCTTCTCCTCTTCTCCGGGTGTGCAGGGGTGTTCAAAGATTCCTGGCTGAGGGTTTGGCTGTACTTATGTGTTTTGCAAATTGGTCTCTATGAATAC…
TCONS_00083178	XLOC_042735	XLOC_042735	Chr6:30563598-30564007	cytoplasm	0.96	409	CCTCAGATCGTCCAACTCCTGTGTCTACATCAAATAAAATAGCTATTATCTCATAAAATGTCCTTGAAGCAAGAATTAGTACTCAAGGGGAAGAGCATTCATGTTGTCCACATTGAGTACAACAGGAAAAGCAAAACCTAAAGCAATATACTACTTTTTCAAGTATGCTTTGGTCAATACCTTATTACTTGCTCTATTCTCTTGTTCTTTTGACATGGTATGAATGCACTTTGATTAATTACTTCTTCATATTTAAATGCATGCTAGCAAAATATATTACACGCATAATGACACTGTTGGTACTTAAAGGCTTAAAAGCTAGCAGCTGTTGAGCTAGCTGTCTCATGAAGCTAGCTTAATTAAGTCTGATTTATTTATATATGTAGACATCCAGAGAGA…
TCONS_00085814	XLOC_044119	LOC_Os06g29730	Chr6:17066918-17068618	cytoplasm	0.93	544	TAGTACATATATCAAGCATACACAAGAAGGATTTATTGAAGGCCAACCATGGCGTCTCTTAGAGCCACCACACTCCTTGTGTTGATGCAAATTATTATGGTGTTTTACACCGTCATCTTAAGCTGCTCGTTTTCTGATGCCCGAACTTTCCCAGGCGGAGAAGGTGGGTTAGACCCAAATCATCCAGTATGCGTTGGCGGCGCGTGTCCAACACCAGGTCTACCATACACTAATCCACGTGATCCTTGCATATACCGTAACAGGTGCAATCCACCAGGACGGATGGGTGATCCATAAGTAATTTTCATCATCAATATTTATCGTTGTGATCCAGTATACGTCCACATCGTCCACATGACAATAGTGTGTGTTTGTGTATGTTATACTAGTATTCACTAG…
TCONS_00086481	XLOC_044558	XLOC_044558	Chr6:22846202-22847113	cytoplasm	0.97	799	CGACGACGCAGCCATTTACCCCACCCCAGCTCATAAATACTTCTCGCTCTCTTGCAACGAAGCCACTGCAGTGCCCGGCCAGTCACAGGCAAACCATCTACATTCTACACACATATCTCACTCATCCTGTCATCCACCCATCAACGTACGTACGTGTGATCTGCTTAATTGGGAGTTAGAAGAAGAGGCCGAGGTAAGTTGAATTTGCTGCAGAGAGAGAGAGAGAGAGAATCAATGGCGCTTATCCCGTCGCTGGCCGCCGCCCGCTACGCGCTGCTCGCGTTGCCGCCTCTCATGGTGGCCGCGTATGTTTATAACGGCGGGGGTCGGGGAAATGGAGATAGACCGCGTGCAAGAAGCATCAACAAATTCACCGATGGCGGTCCAGCTACCGCCGGC…
TCONS_00087929	XLOC_045202	XLOC_045202	Chr6:2352077-2352416	cytoplasm	0.53	339	CATCAGCAAAGCGGCGTTGCTTCTTCTGCCGGTGATGGTAGCTCTGTGATGTAAGCTAGGCACATGCATGTTGTATTTCCTCCTCCCCTATAATCTCTTCGATCGGTAGAATCCGGCCGGCGAGCGGGAGAAGAAGGGTCCTACTCACCTCGTACTCGTAGTTGCTATCTAGCTTAGCTTCAGTTGTTGGATCACTGGATGATGTTGTATTTCATCGATAGTACGTTGGATTGATCTGTTGTTTAATCATTGCCTGTATTCTTTATCTCGATCCTTCTTTCTTCTTAACTGATCAGAATATGACTAGCTGTTGTGTGAAGAATGTATTCTTGATCTTGG
TCONS_00087936	XLOC_045209	XLOC_045209	Chr6:4406895-4407097	nucleus	0.53	202	GGGTTTCCGTGTCCAACTTTGACTATCCGTCTTATATGAAATTTTTTTATAATTCGTATTTTCATTGTTGTTAGATGATAAAACATGATTAATATTTTATGCGTGACTTGTCTTTTTAATTTTTTTCATAATTTTTTCAAATAAGACGGACGGTCAAACGTTGGACACGGAAACCAGGGTTTGTCTTTTTTTGGGACGGAGG
TCONS_00088033	XLOC_045306	XLOC_045306	Chr6:25431968-25432958	cytoplasm	0.93	990	CAAATTATTACCAGTTATAGCATCAATAATTATTGTGAGAGGCGTGAGACTAATCACGAAAAATATTGCTCAACCCGCCCATAACCGTGGGCACGGCTATTCGAATAGTTTTACTCTGGCCAGAGGTGTACCACTGTACCCACAAGACACAGCCTCAACATCATGTCTACCATGCGTCGCGATACTGGAAAGTACCCGACTAGAGGCTGTGACAATACCCCCTGCACAACACAACTCACCACAGTGCACCATTCCTGGATCATAATCACCCCCTTATAAAACAAGGCATAGACAGCCCAGCGACCCCCGTGGGCTTATCTCCGCCACTTCTCAGTCTGGTGCTCCGCAATGAACCATGCTATACAAAAGGTAAAGCCGTTGCCCACGCTGGCTTGTGGT…
TCONS_00088047	XLOC_045320	XLOC_045320	Chr6:28486734-28487038	cytoplasm	0.94	304	CAACCTGTGCTAGCTGCTCTGTCTGCTTGCAAACACAGTTGCAGATCGAGATGCTACGATGTGCTTCTTCTCTTCGAAGTTAGCAAAGGTTCCTTCCAATGCGTACGCATGCATACGCATTGAGATCGAAGGAATCTGATTCCAGTCGATTGATCTGGGTTATATATGCTTGGAAAATAGCGTTGCTGGCTTGTTCTTATCCCCAAGATCATCTGATACGCAGGAAACGATCCACACTTGTTCATAAACAAATCAGTTAATCGCTTACTTAGAGAGCATATTAGCTATCCAAAGCCAAACCTCC
TCONS_00088604	XLOC_045627	LOC_Os07g07280	Chr7:3616036-3618205	cytoplasm	0.92	992	TCGTCAGGGCGCGGTGATCCCGCCCCGGCGGTTTGGGAAAATCCAACTAAAAATTGAACTAGAGTGAATTGAACCGGATGACATGATGACACCGCTACCCATTAAGTTTCGTCCAAATTACGGGTAAATTGCCACCGCCCTACCCCTTCCGTCCCAACTCCCAACCCCATTACCCCATTCCGCCCTACCCCTCGAAGCAGGAGAAAGGAAGGAGAGGCGGCGGGAGGGAAGTCGCACGTCGTCGTCGGGGTCGGCGGCGCACGTCGGAGGCGGAGGCGGAGGCGGCGCCCTCCCTCCCTCCCTCCCTGTGTCTTCCCCCACTCCTCCCAAAACCCGACGGCCGGCGGCGCGGCGGAGGGCTGCGGCTGAAGGAGTCTGAGAGGGCGGCGCACGGCGGGT…
TCONS_00091234	XLOC_047073	XLOC_047073	Chr7:23184013-23184924	cytoplasm	0.85	808	CTCCAGTAGTACTGGGCTACTAGCTGTAGTAGCCAGCTGTGACAGTGGTGAGCATGGATGGTTTCGTGTGTTTGCCCAGAGGACAAGAGGCCACTGTGGTATTCATCAACCTCTTGACGCCTCTCTTGTTTGCAATCGCAGAGCTCGTCGTTTTTCATCCACATGCATAGTGAGATTCTTCCATGGCTAATTCTCGATGTCTTAGGGGACCTGTGTGTTCATGTGAATTATAGTTAGGCCTTGTTTAGGGAAGCTTTTAGTAGCTGCGGTTTCTTTTAGAATCTCATGCTCCTTCAAACAATACAAATTCTCGCATATATTCTCCAGTTACTTGGAATCTCAAGCCCCCTCCAATAGAGCCTTAACCTTAGAAACTTTTCACAAATGTGTATACTACAT…
TCONS_00096479	XLOC_049782	XLOC_049782	Chr7:281961-283340	cytoplasm	0.86	1379	GAGAGGAGTTCTGGCATTCCCGATGTCTTTAGAGAGAACTGATTGTATGACACCATGTCATCACAATCAGGGTTTACAAACAATTTGTGCACAATTCATCTCATATATTTACCTGCGCCTCGGTAAATATCACAATTGCCCTTCGCGGCATAAATTTGCCTCCTGCGCGAGGACTTAAGAAGAACCACTATACAGAGGTACCACTTTTGCTAGATAACTTAATCAGCTAGGTCTATGCCCATACGAGAATTGCGGTCGTACTCGTATGTTCTTCACATATACTTGGCAGTCTTATGTCGGTTGGAACAGTACTAGCTACCCGAAAATCAACCATTTCTACCGTATTGTCCCAATCTAAGTTCATTATATTTTACGCAGTCTAACTAGGCAGGGCTAAAC…
TCONS_00096548	XLOC_049851	XLOC_049851	Chr7:22722558-22723782	cytoplasm	0.89	1224	CCCTGCTTTATCAATTCCCTTGAAAGTCTAATACCAACTCACCACACCATTGTTTGAAGAGCGGGATGGAGCAGAAAAGAGAGTTTGTCCCCTCTCTACCACACTTAAATCCCAATATCATAAATTAATTATAAGATTGAAAAAAACTTGGAAAATCTAACATCATATCCTGGTTTGTCAATTTTTCAATGAAGGTGTGCCAAATAAAGATGCGACTTGTCCAGTTTATTGCCAAATAAAATTGGTAGAGTTGAAAGTTGTAGCAAAATGAACAAGCCCATATATGAAGAGGGATAGAGGGGAAATGTGACTTTGTTTGGAGGTGTGCACCAAAGAGATTGGCACCAACTTCTTGCCATTTCAATGTCTAGTGTAGTATCGCTTCCACAGTGCCAAATT…
TCONS_00099091	XLOC_051299	LOC_Os08g30980	Chr8:19124339-19127813	nucleus	0.63	2464	AGAAAAATGAAAAAAGAGGGGGATCGGGAGGAGGGGAAGGGATCGGCGACGGGAAGAAAAACGAAAAAAAGAGGGATCGGGAGGAGGCGGCGATGGGATTGGGCGCAAGAAGGAGGAGGGAGGCGCGTCGCGCGGGATGGGAAAGGGAGGTGGGTTCGGTTGGGGGAGGGGGTGTAGAAGGAGGAGGAGGGAGGCGCGACGCGCGGGATGGGAAAGGGAGGTGGGTTCAGTTGGGGGAGAGGGTGTAGAATAGTTATATGGTCCGCTGCGTCGCCGACCGGTTCCCGGGCCTCACCGATGTCTTCCTCGACCACGGCCTCTACATCGCCGCCGGCGCCTCCGCCGCTGCCGCGGAGCGGAGCAGGGCACAAGATTGGGATAACGAAAGCCCCAAGTCAG…
TCONS_00103084	XLOC_053468	LOC_Os08g31950	Chr8:19813646-19814816	exosome	0.5	1170	ATGGAGATGAGGCGCCTGGCTGTGAGCGGCGGGAGGAGGAGGAGGATCAGGCCGGCGGCGGCGCGGAGGAGCGGCGTGGCGCTGAGGCGGAAGGTGCGGGAGCTCCGGCGGCTGGTGCCCGGCGGGGAGGGCGCGCCGGCGAGGAGCCTGCTCGTCCGCACCGCCGACTACATCGTCCGGCTCAAGGCGAGGGTCGAGCTCCTCAGGGCGCTCTCCGCGCTCTACGACGAGCTTCCACTCCCCGCCGGCGTCTGAGCCCGCCGCCGGGGCGCGGTGGCGCGCCGCGATCGATCATTGCTTGCTTGCACCGAGATGAGAGATATACAGTAGCTATGTATAGAAGAAGAATTGAATGAATTCATTTCGAACAAGACAGCATAAAAGACATCACTATTGAAT…
TCONS_00104478	XLOC_054212	XLOC_054212	Chr8:23890991-23891747	nucleus	0.9	756	GTGATATTAACAGCATGGAGGTGTGGACATAGAAAAGGTAGAGAGGAGGAGGTTGACAATACGATACAATAGAGAAGTGATATTAATCTTAAGTACTGCCCTACCTACAATCCAAAGATAAGTACGGGTTACCTTCGTGAGTATGCTTATATTCTATCTTAGTACTCTATCTGTCTAAAAAATCAATCTAGATGGAAATTTGTCACAAAACCTAGAACAAAGAATCTAAACAAGATTATTCTAGATTGTGTCAAATTCCAATATCGATTGAGCGTTTTTTTTTCACGGAGAGTGTAATTAGGACACTAACAGTGCAAGCACCAACTAGGAAAGACCACGAGCTGACACATAGGATGAAGAGATTCAAAAATATTTTCTCCACAATGCAAGTAACCTTAT…
TCONS_00104482	XLOC_054216	XLOC_054216	Chr8:24795337-24796406	cytoplasm	0.98	1069	GTCAAGAGTGATCAAGAGTCTCAAAACCACACGCTAAAGGCACCTAAAAGACAAAAAGGCTATGAGCATAACGTTTGCTCAATGATTCTTTGCAATGACAGGAGATATCAATTTTGCATTGCAAAATTATATGCAGGACTAAGTTTCTTGAAGATTTTACTCTAGACTGACATAATATGGTTACTGGAAACTACTGCATAGAGACTAGAGAGAGAAAATTCATAATATATTTCAGTACTTATGTTAGTAAACAGTAACTGCATTGCACTCCAGAACCAGGGAATAATCTAGATTCTAGAGTAGATAGAGACGTGTATGATTCACATGTATGCTCATGGTCTCATGGATGATTCTTCCTTGAAGAACATTACAATAACATCTCAAATGCAGAAGCAAATG…
TCONS_00110829	XLOC_057699	XLOC_057699	Chr9:15064864-15065278	cytoplasm	0.61	414	GCCGCAACTCCTATCGCGAAAGATGAGCAGAATCTCATCCTCACTAGCCACATTCCTCCCCCAACCCTAGCCACCATAGGCATACGGTATTGCGCAGGCATGTACAGTCACCCCTAATCCTCTCTATTTAAGGCCGGCTCCACCGGAACGGTTTGAGGAAGAAGAAGACGAGACCTCCCCAGATCTGGCCTCTTCTTGGCTCCTTCCGCCATAGTCGTACTTGTTTGACAGGGTGGTCGTCTTTTCCTCTCTCTCTCTCTCTCTCTCTCTGATGCTTGGTCACCGTGTTGATCCGCGATTGGATCGCGGTGGTCGACGACGGGATGGTGTGTCGTGGATGGATGGACGGATGTGGGGGCGACGAGAACCGATGGCGGTGGCCGCGGCTGGCTGACAGAA…
TCONS_00111007	XLOC_057832	XLOC_057832	ChrSy:542208-542763	nucleus	0.64	555	CTCGGGAACGCCAGAACTCCTCTCGCTGCTGATAACGTTACGTTCAGAGTGCATGGGGACTAGAGTTCATGGAACAGGTACCACTGATGTTAGTAACTGAAAAGCTTTGCCATGACAAGGCTAATGTGTTTGGCACGTCATGGATTGCGGGTAAAGCGTACATCTACTGTAGTATGAATATCCTCAAAACTATTCAAATAGCCGTGCTCGCGGTTATCGAGCATTGGGACTCACTATGGCATCTTGGATAGAAACCTAATTTGAAATTTTATTAAATACTGCTGCATTTAAAACATTACAGGTTTTCTACTTCTACATTCTCTGCTTTTTGCAAGTAAACCTAGCTTTACACAGATATTATTATTTCATACATTCATTGTTGATTAAATATAATAGCTT…
