# Supplementary material for: Pokkali: A Naturally Evolved Salt-Tolerant Rice Shows a Distinguished Set of lncRNAs Possibly Contributing to the Tolerant Phenotype
Source: Int J Mol Sci. 2023 Jul 20;24(14):11677. doi: 10.3390/ijms241411677 (PMC10380863; doi:10.3390/ijms241411677)
Supplement: Supplementary file 1 [file ijms-24-11677-s001.zip › Table S5.xlsx]

## Sheet: IR64
List of targeted miRNAs									List of targeted genes
miRNA_Acc.	Target_Acc.	Expectation	Target_start	Target_end	miRNA_aligned_fragment	Target_aligned_fragment	Inhibition		miRNA_Acc.	Target_Acc.	Expectation	Target_start	Target_end	miRNA_aligned_fragment	Target_aligned_fragment	Inhibition	Target_Desc.
osa-miR397b	XLOC_000467	1.5	1070	1090	UUAUUGAGUGCAGCGUUGAUG	AUUCAACGUUGCAUUUAAUAA	Cleavage		osa-miR156k	LOC_Os11g30370.1	0	1090	1110	UGACAGAAGAGAGAGAGCACA	UGUGCUCUCUCUCUUCUGUCA	Cleavage	cDNA|OsSPL19 - SBP-box gene family member, expressed
osa-miR2919	XLOC_043574	2	129	147	AAGGGGGGGGGGGGAAAGA	UUUUUCCCCUUUCCCCCUU	Cleavage		osa-miR156k	LOC_Os09g32944.1	0	1033	1053	UGACAGAAGAGAGAGAGCACA	UGUGCUCUCUCUCUUCUGUCA	Cleavage	cDNA|OsSPL18 - SBP-box gene family member, expressed
osa-miR156k	XLOC_048354	2.5	11	31	UGACAGAAGAGAGAGAGCACA	CUUCCUCUCUCUCUGCUGUCA	Cleavage		osa-miR156k	LOC_Os09g31438.1	0	808	828	UGACAGAAGAGAGAGAGCACA	UGUGCUCUCUCUCUUCUGUCA	Cleavage	cDNA|OsSPL17 - SBP-box gene family member, expressed
osa-miR1862e	XLOC_043574	2.5	3194	3217	CUAGAUUUGUUUAUUUUGGGACGG	ACAUUUUGAGAUAAACAAGUCUAG	Cleavage		osa-miR156k	LOC_Os08g41940.1	0	1053	1073	UGACAGAAGAGAGAGAGCACA	UGUGCUCUCUCUCUUCUGUCA	Cleavage	cDNA|OsSPL16 - SBP-box gene family member, expressed
osa-miR2118h	XLOC_048354	2.5	4653	4674	UUCCUGAUGCCUCUCAUUCCUA	UGUGAUUGAGAGGCAUCAGUAA	Cleavage		osa-miR156k	LOC_Os08g39890.1	0	991	1011	UGACAGAAGAGAGAGAGCACA	UGUGCUCUCUCUCUUCUGUCA	Cleavage	cDNA|OsSPL14 - SBP-box gene family member, expressed
osa-miR2118k	XLOC_048354	2.5	4653	4674	UUCCUGAUGCCUCUCAUUCCUA	UGUGAUUGAGAGGCAUCAGUAA	Cleavage		osa-miR156k	LOC_Os01g69830.1	0	1152	1172	UGACAGAAGAGAGAGAGCACA	UGUGCUCUCUCUCUUCUGUCA	Cleavage	cDNA|OsSPL2 - SBP-box gene family member, expressed
osa-miR821a	XLOC_043574	2.5	4023	4046	AAGUCAUCAACAAAAAAGUUGAAU	AUACAACUUUGUUGUUGAUGAUUA	Cleavage		osa-miR156k	LOC_Os06g45310.1	0	853	873	UGACAGAAGAGAGAGAGCACA	CGUGCUCUCUCUCUUCUGUCA	Cleavage	cDNA|OsSPL11 - SBP-box gene family member, expressed
osa-miR821b	XLOC_043574	2.5	4023	4046	AAGUCAUCAACAAAAAAGUUGAAU	AUACAACUUUGUUGUUGAUGAUUA	Cleavage		osa-miR156k	LOC_Os04g46580.1	0	817	837	UGACAGAAGAGAGAGAGCACA	GGUGCUCUCUCUCUUCUGUCA	Cleavage	cDNA|OsSPL7 - SBP-box gene family member, expressed
osa-miR821c	XLOC_043574	2.5	4023	4046	AAGUCAUCAACAAAAAAGUUGAAU	AUACAACUUUGUUGUUGAUGAUUA	Cleavage		osa-miR156k	LOC_Os02g07780.1	0	986	1006	UGACAGAAGAGAGAGAGCACA	CGUGCUCUCUCUCUUCUGUCA	Cleavage	cDNA|OsSPL4 - SBP-box gene family member, expressed
osa-miR1846a-5p	XLOC_001530	3	254	274	AGUGAGGAGGCCGGGGCCGCU	GAUGGUCUCGGCCUCCCCACU	Cleavage		osa-miR156k	LOC_Os06g49010.3	0	1438	1458	UGACAGAAGAGAGAGAGCACA	CGUGCUCUCUCUCUUCUGUCA	Cleavage	cDNA|OsSPL12 - SBP-box gene family member, expressed
osa-miR1846b-5p	XLOC_001530	3	254	274	AGUGAGGAGGCCGGGGCCGCU	GAUGGUCUCGGCCUCCCCACU	Cleavage		osa-miR156k	LOC_Os06g49010.2	0	1493	1513	UGACAGAAGAGAGAGAGCACA	CGUGCUCUCUCUCUUCUGUCA	Cleavage	cDNA|OsSPL12 - SBP-box gene family member, expressed
osa-miR1846c-5p	XLOC_001530	3	254	274	AGUGAGGAGGCCGGGGCCGCU	GAUGGUCUCGGCCUCCCCACU	Cleavage		osa-miR156k	LOC_Os06g49010.4	0	1637	1657	UGACAGAAGAGAGAGAGCACA	CGUGCUCUCUCUCUUCUGUCA	Cleavage	cDNA|OsSPL12 - SBP-box gene family member, expressed
osa-miR2120	XLOC_048354	3	3942	3966	AAAG-AUCUUUAGUCCCGGUUGUUC	CACCAACCGGGACUAAAGAUGCUUU	Cleavage		osa-miR156k	LOC_Os06g49010.1	0	1685	1705	UGACAGAAGAGAGAGAGCACA	CGUGCUCUCUCUCUUCUGUCA	Cleavage	cDNA|OsSPL12 - SBP-box gene family member, expressed
osa-miR397a	XLOC_000467	3	1070	1090	UCAUUGAGUGCAGCGUUGAUG	AUUCAACGUUGCAUUUAAUAA	Cleavage		osa-miR156k	LOC_Os06g49010.6	0	1841	1861	UGACAGAAGAGAGAGAGCACA	CGUGCUCUCUCUCUUCUGUCA	Cleavage	cDNA|OsSPL12 - SBP-box gene family member, expressed
osa-miR5809	XLOC_047008	3	455	474	UCGUCGCCGGCGACCACAGC	GCCGUGCUCGUCGGCGGCGA	Cleavage		osa-miR156k	LOC_Os06g49010.5	0	2017	2037	UGACAGAAGAGAGAGAGCACA	CGUGCUCUCUCUCUUCUGUCA	Cleavage	cDNA|OsSPL12 - SBP-box gene family member, expressed
osa-miR5820	XLOC_024018	3	14	34	UGGCAGAGAUUGAUCGAGGAA	AGCUUUGAUCGAUCUCUCCCA	Cleavage		osa-miR156k	LOC_Os02g07780.2	0	2220	2240	UGACAGAAGAGAGAGAGCACA	CGUGCUCUCUCUCUUCUGUCA	Cleavage	cDNA|OsSPL4 - SBP-box gene family member, expressed
osa-miR156a	XLOC_048354	3.5	12	31	UGACAGAAGAGAGUGAGCAC	UUCCUCUCUCUCUGCUGUCA	Cleavage		osa-miR156k	LOC_Os02g04680.2	0	1961	1981	UGACAGAAGAGAGAGAGCACA	CAUGCUCUCUCUCUUCUGUCA	Cleavage	cDNA|OsSPL3 - SBP-box gene family member, expressed
osa-miR156b-5p	XLOC_048354	3.5	12	31	UGACAGAAGAGAGUGAGCAC	UUCCUCUCUCUCUGCUGUCA	Cleavage		osa-miR156k	LOC_Os02g04680.1	0	1964	1984	UGACAGAAGAGAGAGAGCACA	CAUGCUCUCUCUCUUCUGUCA	Cleavage	cDNA|OsSPL3 - SBP-box gene family member, expressed
osa-miR156c-5p	XLOC_048354	3.5	12	31	UGACAGAAGAGAGUGAGCAC	UUCCUCUCUCUCUGCUGUCA	Cleavage		osa-miR156k	LOC_Os11g30370.1	0	1090	1110	UGACAGAAGAGAGAGAGCACA	UGUGCUCUCUCUCUUCUGUCA	Cleavage	cDNA|OsSPL19 - SBP-box gene family member, expressed
osa-miR156d	XLOC_048354	3.5	12	31	UGACAGAAGAGAGUGAGCAC	UUCCUCUCUCUCUGCUGUCA	Cleavage		osa-miR156k	LOC_Os09g32944.1	0	1033	1053	UGACAGAAGAGAGAGAGCACA	UGUGCUCUCUCUCUUCUGUCA	Cleavage	cDNA|OsSPL18 - SBP-box gene family member, expressed
osa-miR156e	XLOC_048354	3.5	12	31	UGACAGAAGAGAGUGAGCAC	UUCCUCUCUCUCUGCUGUCA	Cleavage		osa-miR156k	LOC_Os09g31438.1	0	808	828	UGACAGAAGAGAGAGAGCACA	UGUGCUCUCUCUCUUCUGUCA	Cleavage	cDNA|OsSPL17 - SBP-box gene family member, expressed
osa-miR156f-5p	XLOC_048354	3.5	12	31	UGACAGAAGAGAGUGAGCAC	UUCCUCUCUCUCUGCUGUCA	Cleavage		osa-miR156k	LOC_Os08g41940.1	0	1053	1073	UGACAGAAGAGAGAGAGCACA	UGUGCUCUCUCUCUUCUGUCA	Cleavage	cDNA|OsSPL16 - SBP-box gene family member, expressed
osa-miR156g-5p	XLOC_048354	3.5	12	31	UGACAGAAGAGAGUGAGCAC	UUCCUCUCUCUCUGCUGUCA	Cleavage		osa-miR156k	LOC_Os08g39890.1	0	991	1011	UGACAGAAGAGAGAGAGCACA	UGUGCUCUCUCUCUUCUGUCA	Cleavage	cDNA|OsSPL14 - SBP-box gene family member, expressed
osa-miR156h-5p	XLOC_048354	3.5	12	31	UGACAGAAGAGAGUGAGCAC	UUCCUCUCUCUCUGCUGUCA	Cleavage		osa-miR156k	LOC_Os01g69830.1	0	1152	1172	UGACAGAAGAGAGAGAGCACA	UGUGCUCUCUCUCUUCUGUCA	Cleavage	cDNA|OsSPL2 - SBP-box gene family member, expressed
osa-miR156i	XLOC_048354	3.5	12	31	UGACAGAAGAGAGUGAGCAC	UUCCUCUCUCUCUGCUGUCA	Cleavage		osa-miR156k	LOC_Os06g45310.1	0	853	873	UGACAGAAGAGAGAGAGCACA	CGUGCUCUCUCUCUUCUGUCA	Cleavage	cDNA|OsSPL11 - SBP-box gene family member, expressed
osa-miR156j-5p	XLOC_048354	3.5	12	31	UGACAGAAGAGAGUGAGCAC	UUCCUCUCUCUCUGCUGUCA	Cleavage		osa-miR156k	LOC_Os04g46580.1	0	817	837	UGACAGAAGAGAGAGAGCACA	GGUGCUCUCUCUCUUCUGUCA	Cleavage	cDNA|OsSPL7 - SBP-box gene family member, expressed
osa-miR166g-5p	XLOC_057735	3.5	125	145	AAUGGAGGCUGAUCCAAGAUC	UCUCGUGAAUUAGCUUUCAUU	Cleavage		osa-miR156k	LOC_Os02g07780.1	0	986	1006	UGACAGAAGAGAGAGAGCACA	CGUGCUCUCUCUCUUCUGUCA	Cleavage	cDNA|OsSPL4 - SBP-box gene family member, expressed
osa-miR1858a	XLOC_034986	3.5	210	230	GAGAGGAGGACGGAGUGGGGC	UCGCCGUUCCGGCCUCCUCUC	Translation		osa-miR156k	LOC_Os06g49010.3	0	1438	1458	UGACAGAAGAGAGAGAGCACA	CGUGCUCUCUCUCUUCUGUCA	Cleavage	cDNA|OsSPL12 - SBP-box gene family member, expressed
osa-miR1858b	XLOC_034986	3.5	210	230	GAGAGGAGGACGGAGUGGGGC	UCGCCGUUCCGGCCUCCUCUC	Translation		osa-miR156k	LOC_Os06g49010.2	0	1493	1513	UGACAGAAGAGAGAGAGCACA	CGUGCUCUCUCUCUUCUGUCA	Cleavage	cDNA|OsSPL12 - SBP-box gene family member, expressed
osa-miR1862d	XLOC_043574	3.5	3195	3218	ACUAGGUUUGUUUAUUUUGGGACG	CAUUUUGAGAUAAACAAGUCUAGA	Cleavage		osa-miR156k	LOC_Os06g49010.4	0	1637	1657	UGACAGAAGAGAGAGAGCACA	CGUGCUCUCUCUCUUCUGUCA	Cleavage	cDNA|OsSPL12 - SBP-box gene family member, expressed
osa-miR1866-3p	XLOC_053362	3.5	4803	4824	UGAAAUUCCUGUAAAAUUCUUG	UUGGAAUUUUAUUGGAAUUUUC	Translation		osa-miR156k	LOC_Os06g49010.1	0	1685	1705	UGACAGAAGAGAGAGAGCACA	CGUGCUCUCUCUCUUCUGUCA	Cleavage	cDNA|OsSPL12 - SBP-box gene family member, expressed
osa-miR2118f	XLOC_048354	3.5	4653	4674	UUCCUGAUGCCUCCCAUUCCUA	UGUGAUUGAGAGGCAUCAGUAA	Cleavage		osa-miR156k	LOC_Os06g49010.6	0	1841	1861	UGACAGAAGAGAGAGAGCACA	CGUGCUCUCUCUCUUCUGUCA	Cleavage	cDNA|OsSPL12 - SBP-box gene family member, expressed
osa-miR2118j	XLOC_048354	3.5	4653	4674	UUCCUGAUGCCUCCCAUUCCUA	UGUGAUUGAGAGGCAUCAGUAA	Cleavage		osa-miR156k	LOC_Os06g49010.5	0	2017	2037	UGACAGAAGAGAGAGAGCACA	CGUGCUCUCUCUCUUCUGUCA	Cleavage	cDNA|OsSPL12 - SBP-box gene family member, expressed
osa-miR2118m	XLOC_048354	3.5	4653	4674	UUCCUGAUGCCUCCCAUUCCUA	UGUGAUUGAGAGGCAUCAGUAA	Cleavage		osa-miR156k	LOC_Os02g07780.2	0	2220	2240	UGACAGAAGAGAGAGAGCACA	CGUGCUCUCUCUCUUCUGUCA	Cleavage	cDNA|OsSPL4 - SBP-box gene family member, expressed
osa-miR2925	XLOC_047008	3.5	522	540	UGGCGGCCGCGGGCUUCGU	ACGGCGGCCGCGGCCGCCG	Cleavage		osa-miR156k	LOC_Os02g04680.2	0	1961	1981	UGACAGAAGAGAGAGAGCACA	CAUGCUCUCUCUCUUCUGUCA	Cleavage	cDNA|OsSPL3 - SBP-box gene family member, expressed
osa-miR3980a-3p	XLOC_001530	3.5	248	268	CUGGCCGAGGCCGUCGAUUCU	GGAAUCGAUGGUCUCGGCCUC	Cleavage		osa-miR156k	LOC_Os02g04680.1	0	1964	1984	UGACAGAAGAGAGAGAGCACA	CAUGCUCUCUCUCUUCUGUCA	Cleavage	cDNA|OsSPL3 - SBP-box gene family member, expressed
osa-miR3980b-3p	XLOC_001530	3.5	248	268	CUGGCCGAGGCCGUCGAUUCU	GGAAUCGAUGGUCUCGGCCUC	Cleavage		osa-miR166i-5p	LOC_Os03g44835.1	0	1345	1365	AAUGCAGUUUGAUCCAAGAUC	GAUCUUGGAUCAAACUGCAUU	Cleavage	cDNA|expressed protein
osa-miR414	XLOC_001049	3.5	281	301	UCAUCCUCAUCAUCAUCGUCC	CGACGACGAUGAUGAGGAGGC	Cleavage		osa-miR1846a-5p	LOC_Os10g12320.1	0	76	96	AGUGAGGAGGCCGGGGCCGCU	GGCGGCCCCGGCCUCCUCACU	Cleavage	cDNA|expressed protein
osa-miR5492	XLOC_053362	3.5	2406	2426	AGAAGGAGAAUAGAUAUGGUU	AUUCAUAUCUAUUCACCUUUA	Cleavage		osa-miR1846a-5p	LOC_Os02g43950.1	0	76	96	AGUGAGGAGGCCGGGGCCGCU	GGCGGCCCCGGCCUCCUCACU	Cleavage	cDNA|expressed protein
osa-miR5512a	XLOC_029640	3.5	1326	1346	UAGGAUAUGGUAAUGCUAAAA	AUUUAUCAUUAUCACAUUCUA	Cleavage		osa-miR1846b-5p	LOC_Os10g12320.1	0	76	96	AGUGAGGAGGCCGGGGCCGCU	GGCGGCCCCGGCCUCCUCACU	Cleavage	cDNA|expressed protein
osa-miR5512b	XLOC_029640	3.5	1326	1346	UAGGAUAUGGUAAUGCUAAAA	AUUUAUCAUUAUCACAUUCUA	Cleavage		osa-miR1846b-5p	LOC_Os02g43950.1	0	76	96	AGUGAGGAGGCCGGGGCCGCU	GGCGGCCCCGGCCUCCUCACU	Cleavage	cDNA|expressed protein
osa-miR5521	XLOC_035128	3.5	6	26	AGUGGCUGCAUAUCUGAUGAG	CUCGCUAUAUAUGCGGCCACU	Cleavage		osa-miR1846c-5p	LOC_Os10g12320.1	0	76	96	AGUGAGGAGGCCGGGGCCGCU	GGCGGCCCCGGCCUCCUCACU	Cleavage	cDNA|expressed protein
osa-miR6256	XLOC_000467	3.5	1860	1881	GUAGUACUCGGUUGUAGGUGUA	AAAACUUAAGACCGAGUACUUC	Cleavage		osa-miR1846c-5p	LOC_Os02g43950.1	0	76	96	AGUGAGGAGGCCGGGGCCGCU	GGCGGCCCCGGCCUCCUCACU	Cleavage	cDNA|expressed protein
osa-miR812a	XLOC_054197	3.5	26	47	GACGGACGGUUAAACGUUGGAC	AGCACAUGUUUGACCGUUCGUC	Cleavage		osa-miR1848	LOC_Os01g09212.1	0	364	384	CCUCGCCGGCGCGCGCGUGCA	UGCACGCGCGCGCCGGCGAGG	Cleavage	cDNA|retrotransposon protein, putative, Ty1-copia subclass, expressed
osa-miR812b	XLOC_054197	3.5	26	47	GACGGACGGUUAAACGUUGGAC	AGCACAUGUUUGACCGUUCGUC	Cleavage		osa-miR1862f	LOC_Os02g37694.1	0	1094	1113	AUGAGGUUGGUUUAUUUUGG	CCAAAAUAAACCAACCUCAU	Cleavage	cDNA|expressed protein
osa-miR812c	XLOC_054197	3.5	26	47	GACGGACGGUUAAACGUUGGAC	AGCACAUGUUUGACCGUUCGUC	Cleavage		osa-miR1862g	LOC_Os02g37694.1	0	1094	1113	AUGAGGUUGGUUUAUUUUGG	CCAAAAUAAACCAACCUCAU	Cleavage	cDNA|expressed protein
osa-miR812d	XLOC_054197	3.5	26	47	GACGGACGGUUAAACGUUGGAC	AGCACAUGUUUGACCGUUCGUC	Cleavage		osa-miR2120	LOC_Os11g35750.1	0	650	673	AAAGAUCUUUAGUCCCGGUUGUUC	UAAAAACCGGGACUAAAGAUCUUU	Cleavage	cDNA|expressed protein
osa-miR812e	XLOC_054197	3.5	26	47	GACGGACGGUUAAACGUUGGAC	AGCACAUGUUUGACCGUUCGUC	Cleavage		osa-miR2925	LOC_Os01g45470.1	0	152	170	UGGCGGCCGCGGGCUUCGU	ACGAAGCCCGCGGCCGCCA	Cleavage	cDNA|expressed protein
osa-miR1428a-5p	XLOC_029970	4	44	64	CGUUUUGCAAAUUCGCAGGCC	GCUCUGCAGAUUUGCAAAGUU	Cleavage		osa-miR2927	LOC_Os01g63930.1	0	1033	1055	UGUCGUCGUCGAUGGAGCCCAUG	CAUGGGCUCCAUCGACGACGACA	Cleavage	cDNA|cytochrome P450, putative, expressed
osa-miR1431	XLOC_024385	4	158	178	UUUGCGAGUUGGCCCGCUUGC	AUAAGCUAGCCAACUUACAAA	Cleavage		osa-miR2927	LOC_Os01g63930.2	0	1033	1055	UGUCGUCGUCGAUGGAGCCCAUG	CAUGGGCUCCAUCGACGACGACA	Cleavage	cDNA|cytochrome P450, putative, expressed
osa-miR1435	XLOC_000467	4	1138	1156	UUUCUUAAGUCAAACUUUUU	AAGAAGUUUGA-UUAGGAAA	Cleavage		osa-miR408-3p	LOC_Os03g15340.1	0	85	105	CUGCACUGCCUCUUCCCUGGC	CCCAGGGAAGAGGCAGUGCAG	Cleavage	cDNA|plastocyanin-like domain containing protein, putative, expressed
osa-miR156b-3p	XLOC_030829	4	2065	2085	GCUCACUCUCUAUCUGUCAGC	UUGGAUAGAUAGAGAGGGAGG	Cleavage		osa-miR414	LOC_Os12g01320.1	0	2805	2825	UCAUCCUCAUCAUCAUCGUCC	GGACGAUGAUGAUGAGGAUGA	Cleavage	cDNA|retrotransposon protein, putative, Ty3-gypsy subclass, expressed
osa-miR172c	XLOC_014608	4	192	212	UGAAUCUUGAUGAUGCUGCAC	UGGCUGCAUCGCCAAGAUUUG	Translation		osa-miR414	LOC_Os06g33520.1	0	441	461	UCAUCCUCAUCAUCAUCGUCC	CGACGAUGAUGAUGAGGAUGA	Cleavage	cDNA|DEAD/DEAH box helicase, putative, expressed
osa-miR1848	XLOC_001049	4	480	500	CCUCGCCGGCGCGCGCGUGCA	CGCACACGCGCGCCGGCCGGA	Cleavage		osa-miR414	LOC_Os12g27590.1	0	1422	1442	UCAUCCUCAUCAUCAUCGUCC	UGACGAUGAUGAUGAGGAUGA	Cleavage	cDNA|retrotransposon protein, putative, unclassified, expressed
osa-miR1853-5p	XLOC_048525	4	1821	1844	AGCAUUCAAACAUUCCCAAUUACC	UUAAAAUGGGUAUUUUUGAAUGUU	Translation		osa-miR415	LOC_Os12g42280.1	0	2351	2371	AACAGAACAGAAGCAGAGCAG	CUGCUCUGCUUCUGUUCUGUU	Cleavage	cDNA|9-cis-epoxycarotenoid dioxygenase 1, chloroplast precursor, putative, expressed
osa-miR1863a	XLOC_000467	4	1088	1111	AGCUCUGAUACCAUGUUAGAUUAG	UAAAACUAAUUUGGUGUUAGAGAU	Cleavage		osa-miR444b.1	LOC_Os02g36924.1	0	558	578	UGUUGUCUCAAGCUUGCUGCC	GGCAGCAAGCUUGAGACAACA	Cleavage	cDNA|OsMADS27 - MADS-box family gene with MIKCc type-box, expressed
osa-miR1866-5p	XLOC_050893	4	538	561	GAGGGAUUUUGCGGGAAUUUCACG	ACCAAAAUUCUUCUAAAAUCUUUC	Cleavage		osa-miR444b.1	LOC_Os04g38780.1	0	91	111	UGUUGUCUCAAGCUUGCUGCC	GGCAGCAAGCUUGAGACAACA	Cleavage	cDNA|transcription factor, putative, expressed
osa-miR1879	XLOC_048525	4	3818	3841	GUGUUUGGUUUAGGGAUGAGGUGG	AAUCGUCGUCUCAAAAUUGAACAC	Cleavage		osa-miR444b.2	LOC_Os04g38780.1	0	97	117	UGCAGUUGUUGUCUCAAGCUU	AAGCUUGAGACAACAACUGCA	Cleavage	cDNA|transcription factor, putative, expressed
osa-miR1882a	XLOC_048354	4	3802	3825	AGAUUGCUUUCAAGGUCAUUUCUU	GAUUUGUGGAUUUGGAGGCAAUUU	Cleavage		osa-miR444b.2	LOC_Os02g36924.1	0	564	584	UGCAGUUGUUGUCUCAAGCUU	AAGCUUGAGACAACAACUGCA	Cleavage	cDNA|OsMADS27 - MADS-box family gene with MIKCc type-box, expressed
osa-miR1882b	XLOC_048354	4	3802	3825	AGAUUGCUUUCAAGGUCAUUUCUU	GAUUUGUGGAUUUGGAGGCAAUUU	Cleavage		osa-miR444c.1	LOC_Os02g36924.1	0	558	578	UGUUGUCUCAAGCUUGCUGCC	GGCAGCAAGCUUGAGACAACA	Cleavage	cDNA|OsMADS27 - MADS-box family gene with MIKCc type-box, expressed
osa-miR1882c	XLOC_048354	4	3802	3825	AGAUUGCUUUCAAGGUCAUUUCUU	GAUUUGUGGAUUUGGAGGCAAUUU	Cleavage		osa-miR444c.1	LOC_Os04g38780.1	0	91	111	UGUUGUCUCAAGCUUGCUGCC	GGCAGCAAGCUUGAGACAACA	Cleavage	cDNA|transcription factor, putative, expressed
osa-miR1882d	XLOC_048354	4	3802	3825	AGAUUGCUUUCAAGGUCAUUUCUU	GAUUUGUGGAUUUGGAGGCAAUUU	Cleavage		osa-miR444c.2	LOC_Os02g36924.1	0	564	584	UGCAGUUGUUGUCUCAAGCUU	AAGCUUGAGACAACAACUGCA	Cleavage	cDNA|OsMADS27 - MADS-box family gene with MIKCc type-box, expressed
osa-miR1882e-5p	XLOC_048354	4	3802	3825	AGAUUGCUUUCAAGGUCAUUUCUU	GAUUUGUGGAUUUGGAGGCAAUUU	Cleavage		osa-miR444c.2	LOC_Os04g38780.1	0	97	117	UGCAGUUGUUGUCUCAAGCUU	AAGCUUGAGACAACAACUGCA	Cleavage	cDNA|transcription factor, putative, expressed
osa-miR1882f	XLOC_048354	4	3802	3825	AGAUUGCUUUCAAGGUCAUUUCUU	GAUUUGUGGAUUUGGAGGCAAUUU	Cleavage		osa-miR5523	LOC_Os04g16846.1	0	116	137	UGAGGAGGAACAUAUUUACUAG	CUAGUAAAUAUGUUCCUCCUCA	Cleavage	cDNA|cytochrome b6, putative, expressed
osa-miR1882g	XLOC_048354	4	3802	3825	AGAUUGCUUUCAAGGUCAUUUCUU	GAUUUGUGGAUUUGGAGGCAAUUU	Cleavage		osa-miR5523	LOC_Os10g21324.1	0	116	137	UGAGGAGGAACAUAUUUACUAG	CUAGUAAAUAUGUUCCUCCUCA	Cleavage	cDNA|cytochrome b6, putative, expressed
osa-miR1882h	XLOC_048354	4	3802	3825	AGAUUGCUUUCAAGGUCAUUUCUU	GAUUUGUGGAUUUGGAGGCAAUUU	Cleavage		osa-miR5523	LOC_Os01g57942.1	0	116	137	UGAGGAGGAACAUAUUUACUAG	CUAGUAAAUAUGUUCCUCCUCA	Cleavage	cDNA|cytochrome b6, putative, expressed
osa-miR2097-5p	XLOC_030829	4	2045	2065	AGAGAUGGGACGGGCAGGGAAG	AAGCUCUGCCC-UUCCAUCUCU	Translation		osa-miR5829	LOC_Os06g34670.1	0	397	420	AUCAGGACCAGUAGGCGAUGGUAA	UUACCAUCGCCUACUGGUCCUGAU	Cleavage	cDNA|expressed protein
osa-miR2104	XLOC_014436	4	12	33	GCGGCGAGGGGAUGCGAGCGUG	UGCUCUCUCGCCCCCUCGCCGC	Cleavage		osa-miR6249a	LOC_Os03g02230.1	0	460	479	CGUGAAGAGCUCGCCGGCGG	CCGCCGGCGAGCUCUUCACG	Cleavage	cDNA|expressed protein
osa-miR2275c	XLOC_030118	4	523	545	AGAAUUGGAGGAAAACAAACUGA	AACCUUUGUUUUUUUUCGGUUUG	Cleavage		osa-miR6249b	LOC_Os03g02230.1	0	460	479	CGUGAAGAGCUCGCCGGCGG	CCGCCGGCGAGCUCUUCACG	Cleavage	cDNA|expressed protein
osa-miR2868	XLOC_048354	4	3222	3241	UUGGUUUUGUGUAGUAGAAA	AUUCAACUAAACAAAACCCA	Translation		osa-miR812a	LOC_Os03g48380.1	0	1600	1621	GACGGACGGUUAAACGUUGGAC	GUCCAACGUUUAACCGUCCGUC	Cleavage	cDNA|expressed protein
osa-miR2872	XLOC_030118	4	535	555	UGGGGUUCUACAAACCGAACU	UUUUCGGUUUGUAAGACUUCU	Cleavage		osa-miR812b	LOC_Os03g48380.1	0	1600	1621	GACGGACGGUUAAACGUUGGAC	GUCCAACGUUUAACCGUCCGUC	Cleavage	cDNA|expressed protein
osa-miR2873a	XLOC_049857	4	209	232	AAGUUUGGACUUAAAUUUGGUAAC	AUAAACAAAUUUAACUGCAAACUA	Translation		osa-miR812c	LOC_Os03g48380.1	0	1600	1621	GACGGACGGUUAAACGUUGGAC	GUCCAACGUUUAACCGUCCGUC	Cleavage	cDNA|expressed protein
osa-miR2878-5p	XLOC_050893	4	642	665	UACAUGUAUAAAAUUCUGAGGAUG	UUGAAUUUGAAUUUUAUAUGUUUA	Cleavage		osa-miR812d	LOC_Os03g48380.1	0	1600	1621	GACGGACGGUUAAACGUUGGAC	GUCCAACGUUUAACCGUCCGUC	Cleavage	cDNA|expressed protein
osa-miR2921	XLOC_001530	4	606	628	AAGAACUUAAUAUAACUUUAAAGC	GAUUUAGA-UUAUGUUGAGUUUUU	Cleavage		osa-miR812e	LOC_Os03g48380.1	0	1600	1621	GACGGACGGUUAAACGUUGGAC	GUCCAACGUUUAACCGUCCGUC	Cleavage	cDNA|expressed protein
osa-miR2927	XLOC_002582	4	564	586	UGUCGUCGUCGAUGGAGCCCAUG	CCGCGCCUACAUCGGCGGCGGCG	Cleavage		osa-miR812s	LOC_Os11g31690.1	0	1647	1670	AAGACGGACAAUCAAACGUUGGAC	GUCCAACGUUUGAUUGUCCGUCUU	Cleavage	cDNA|expressed protein
osa-miR2929	XLOC_001451	4	871	891	CUCAAGGGUGUUUGUGAAAUA	UAUUUCCAAAAUACCCUUUAG	Cleavage		osa-miR812s	LOC_Os11g31690.2	0	1648	1671	AAGACGGACAAUCAAACGUUGGAC	GUCCAACGUUUGAUUGUCCGUCUU	Cleavage	cDNA|expressed protein
osa-miR396a-3p	XLOC_012049	4	1817	1836	GUUCAAUAAAGCUGUGGGAA	CUAUCACAUUUUUAUUGAAU	Cleavage		osa-miR1439	LOC_Os07g28260.1	0.5	1799	1819	UUUUGGAACGGAGUGAGUAUU	UAUACUCACUCUGUUCCAAAA	Cleavage	cDNA|expressed protein
osa-miR396b-3p	XLOC_012049	4	1817	1836	GUUCAAUAAAGCUGUGGGAA	CUAUCACAUUUUUAUUGAAU	Cleavage		osa-miR1439	LOC_Os07g28260.6	0.5	1935	1955	UUUUGGAACGGAGUGAGUAUU	UAUACUCACUCUGUUCCAAAA	Cleavage	cDNA|expressed protein
osa-miR408-3p	XLOC_030114	4	274	294	CUGCACUGCCUCUUCCCUGGC	AUUAGUGGGGAGGCAGGGCAG	Cleavage		osa-miR1439	LOC_Os07g28260.5	0.5	2053	2073	UUUUGGAACGGAGUGAGUAUU	UAUACUCACUCUGUUCCAAAA	Cleavage	cDNA|expressed protein
osa-miR5075	XLOC_043772	4	141	161	UUCUCCGUCGCCGCCGUCCGC	GGCGGUGGCGGCGGCGGAGCA	Cleavage		osa-miR1439	LOC_Os07g28260.4	0.5	2150	2170	UUUUGGAACGGAGUGAGUAUU	UAUACUCACUCUGUUCCAAAA	Cleavage	cDNA|expressed protein
osa-miR5152-5p	XLOC_043574	4	1710	1730	GUAGGGAUAGGCAUGAUCUCU	CUAGAUUUUGCUUAGCCCUGC	Cleavage		osa-miR169d	LOC_Os07g06470.2	0.5	1214	1234	UAGCCAAGGAUGAAUUGCCGG	GUGGCAAUUCAUCCUUGGCUG	Cleavage	cDNA|nuclear transcription factor Y subunit, putative, expressed
osa-miR5340	XLOC_039631	4	900	922	UGAUGACGUGGAUGAAUUUCAAA	GCGUAAGAGCAUCCACGACAUCA	Cleavage		osa-miR169d	LOC_Os07g06470.1	0.5	1425	1445	UAGCCAAGGAUGAAUUGCCGG	GUGGCAAUUCAUCCUUGGCUG	Cleavage	cDNA|nuclear transcription factor Y subunit, putative, expressed
osa-miR535-5p	XLOC_036674	4	379	399	UGACAACGAGAGAGAGCACGC	CUGUUUUCUCUUUCCUUGUUA	Cleavage		osa-miR172a	LOC_Os05g03040.2	0.5	1552	1572	AGAAUCUUGAUGAUGCUGCAU	CUGCAGCAUCAUCAGGAUUCU	Cleavage	cDNA|AP2 domain containing protein, expressed
osa-miR5489	XLOC_001049	4	1245	1265	CAGGUGUUCUCGAUGGCUUCC	GAAAGUUGUUUAGAAUACCUG	Translation		osa-miR172a	LOC_Os03g60430.1	0.5	1755	1775	AGAAUCUUGAUGAUGCUGCAU	CUGCAGCAUCAUCAGGAUUCU	Cleavage	cDNA|AP2 domain containing protein, expressed
osa-miR5514	XLOC_050893	4	2147	2167	UCCCAGAGCUUUGGCCGUCGC	GUAUCGGCUAAAGCUCUGGUA	Cleavage		osa-miR172a	LOC_Os03g60430.2	0.5	1767	1787	AGAAUCUUGAUGAUGCUGCAU	CUGCAGCAUCAUCAGGAUUCU	Cleavage	cDNA|AP2 domain containing protein, expressed
osa-miR5524	XLOC_034986	4	1681	1701	UGGAAAAUGUGUUCAUGACGG	CUGACAUGGACAUAUUUUGUA	Cleavage		osa-miR172a	LOC_Os07g13170.2	0.5	1463	1483	AGAAUCUUGAUGAUGCUGCAU	CUGCAGCAUCAUCAGGAUUCU	Cleavage	cDNA|AP2 domain containing protein, expressed
osa-miR5528	XLOC_029640	4	1400	1420	AAGACGGUUUUAGAUGUUGCC	UCUAUCAUUUGAAAUUGUUUU	Cleavage		osa-miR172a	LOC_Os07g13170.1	0.5	1404	1424	AGAAUCUUGAUGAUGCUGCAU	CUGCAGCAUCAUCAGGAUUCU	Cleavage	cDNA|AP2 domain containing protein, expressed
osa-miR5543	XLOC_024018	4	642	662	UAUGAAUGGUAUAUUUUCUUG	AUUGGAAGUAUACUAUUCAGA	Cleavage		osa-miR172a	LOC_Os05g03040.1	0.5	1976	1996	AGAAUCUUGAUGAUGCUGCAU	CUGCAGCAUCAUCAGGAUUCU	Cleavage	cDNA|AP2 domain containing protein, expressed
osa-miR5799	XLOC_054197	4	26	49	AAGACGAAUAAUCAAACGUUGGAC	AGCACAUGUUUGACCGUUCGUCUU	Translation		osa-miR172a	LOC_Os05g03040.3	0.5	2089	2109	AGAAUCUUGAUGAUGCUGCAU	CUGCAGCAUCAUCAGGAUUCU	Cleavage	cDNA|AP2 domain containing protein, expressed
osa-miR5825	XLOC_034986	4	462	485	AAAACAUCUGAUAACCUGAAACGG	CGAUUUCAAGUUAUAAGACGUUUU	Translation		osa-miR172b	LOC_Os06g43220.1	0.5	1480	1500	GGAAUCUUGAUGAUGCUGCAU	CUGCAGCAUCAUCAGGAUUCC	Cleavage	cDNA|AP2 domain containing protein, expressed
osa-miR5831	XLOC_001451	4	3408	3431	UAGUCAAACUUAGAAUAGUUGGAC	UUAUAAGUCGUUUGAGUUUGACUA	Cleavage		osa-miR172d-3p	LOC_Os05g03040.2	0.5	1552	1572	AGAAUCUUGAUGAUGCUGCAU	CUGCAGCAUCAUCAGGAUUCU	Cleavage	cDNA|AP2 domain containing protein, expressed
osa-miR6253	XLOC_024018	4	611	632	GAGGAAAGUGGGCAGUUGGGUU	UUACAAUUUGUCUGCUUUCCUC	Cleavage		osa-miR172d-3p	LOC_Os03g60430.1	0.5	1755	1775	AGAAUCUUGAUGAUGCUGCAU	CUGCAGCAUCAUCAGGAUUCU	Cleavage	cDNA|AP2 domain containing protein, expressed
osa-miR812n-5p	XLOC_001530	4	966	989	AAGUGCAGCCAUGAGUUUCCGUGC	GAAAUGAAGCUUAUGGUUGUUUUU	Cleavage		osa-miR172d-3p	LOC_Os03g60430.2	0.5	1767	1787	AGAAUCUUGAUGAUGCUGCAU	CUGCAGCAUCAUCAGGAUUCU	Cleavage	cDNA|AP2 domain containing protein, expressed
osa-miR812s	XLOC_054197	4	26	49	AAGACGGACAAUCAAACGUUGGAC	AGCACAUGUUUGACCGUUCGUCUU	Translation		osa-miR172d-3p	LOC_Os07g13170.2	0.5	1463	1483	AGAAUCUUGAUGAUGCUGCAU	CUGCAGCAUCAUCAGGAUUCU	Cleavage	cDNA|AP2 domain containing protein, expressed
osa-miR818f	XLOC_048525	4	268	288	GGGAGCAUGUAGGAUGGCCAU	CUGGCCAUUCUAUUUACUCCC	Cleavage		osa-miR172d-3p	LOC_Os07g13170.1	0.5	1404	1424	AGAAUCUUGAUGAUGCUGCAU	CUGCAGCAUCAUCAGGAUUCU	Cleavage	cDNA|AP2 domain containing protein, expressed
osa-miR1319b	XLOC_034986	4.5	1635	1658	CCUUUAAUAUAUUAUAGGUGUCGG	CAAAGACUUAUGGUAUCUUAGAGU	Cleavage		osa-miR172d-3p	LOC_Os05g03040.1	0.5	1976	1996	AGAAUCUUGAUGAUGCUGCAU	CUGCAGCAUCAUCAGGAUUCU	Cleavage	cDNA|AP2 domain containing protein, expressed
osa-miR1320-3p	XLOC_036674	4.5	325	346	UGUAA-AAUUCAUUCGUUCCAA	GGGGAAUGAAUGAAUUAUUACC	Cleavage		osa-miR172d-3p	LOC_Os05g03040.3	0.5	2089	2109	AGAAUCUUGAUGAUGCUGCAU	CUGCAGCAUCAUCAGGAUUCU	Cleavage	cDNA|AP2 domain containing protein, expressed
osa-miR1425-3p	XLOC_043574	4.5	2544	2563	CAGCAAGAACUGGAUCUUAAU	AUUUGGAUC-AGUUCUUGCUG	Cleavage		osa-miR1848	LOC_Os08g29780.1	0.5	191	211	CCUCGCCGGCGCGCGCGUGCA	GUCACGCGCGCGCCGGCGGGG	Cleavage	cDNA|expressed protein
osa-miR1438	XLOC_029640	4.5	485	506	AGGGUAAUUUUAUCAUUUUUAA	GCAGGAGUGAUAAAAUUCCCAU	Cleavage		osa-miR1851	LOC_Os01g61520.1	0.5	370	390	CGUCUGGGAUGGCAUUUUGGC	GCCAAAAUGCCAUCCCGGACG	Cleavage	cDNA|expressed protein
osa-miR1440b	XLOC_050893	4.5	2743	2763	UUUAGGAGAGUGGUAUUUGAG	CUUAAAAAUCACUUUCUAAAA	Cleavage		osa-miR1858a	LOC_Os01g53800.1	0.5	330	350	GAGAGGAGGACGGAGUGGGGC	GCCCUACUCCGUCCUCCUCUC	Cleavage	cDNA|glutamate carboxypeptidase 2, putative, expressed
osa-miR1442	XLOC_057735	4.5	170	189	AUUCAUAGUACUAGAUGUGU	CUAUAUUUAAUACUAUAAAU	Translation		osa-miR1858b	LOC_Os01g53800.1	0.5	330	350	GAGAGGAGGACGGAGUGGGGC	GCCCUACUCCGUCCUCCUCUC	Cleavage	cDNA|glutamate carboxypeptidase 2, putative, expressed
osa-miR156l-5p	XLOC_048354	4.5	11	31	CGACAGAAGAGAGUGAGCAUA	CUUCCUCUCUCUCUGCUGUCA	Cleavage		osa-miR1861c	LOC_Os01g63810.2	0.5	608	629	CGAUCUUGUAGCAAGAACUGAG	UCAAGUUCUUGCUGCAAGAUCG	Cleavage	cDNA|starch binding domain containing protein, putative, expressed
osa-miR159a.1	XLOC_034986	4.5	949	969	UUUGGAUUGAAGGGAGCUCUG	CAUAUCUUCUUUCAUUCCAAA	Cleavage		osa-miR1861c	LOC_Os01g63810.1	0.5	664	685	CGAUCUUGUAGCAAGAACUGAG	UCAAGUUCUUGCUGCAAGAUCG	Cleavage	cDNA|starch binding domain containing protein, putative, expressed
osa-miR159b	XLOC_034986	4.5	949	969	UUUGGAUUGAAGGGAGCUCUG	CAUAUCUUCUUUCAUUCCAAA	Cleavage		osa-miR2872	LOC_Os07g28050.1	0.5	283	303	UGGGGUUCUACAAACCGAACU	AGUUCGGUUUGUGGAACCCCA	Cleavage	cDNA|retrotransposon protein, putative, unclassified, expressed
osa-miR166i-5p	XLOC_034986	4.5	1814	1834	AAUGCAGUUUGAUCCAAGAUC	GCUUUCGGGUUGAGCUGCAUC	Cleavage		osa-miR397a	LOC_Os01g62490.1	0.5	761	781	UCAUUGAGUGCAGCGUUGAUG	CAUCAACGCUGCGCUCAAUGA	Cleavage	cDNA|laccase precursor protein, putative, expressed
osa-miR168a-5p	XLOC_035128	4.5	318	338	UCGCUUGGUGCAGAUCGGGAC	CUCCCGCUCUGCGUCAAGAGC	Cleavage		osa-miR414	LOC_Os01g48490.1	0.5	1473	1493	UCAUCCUCAUCAUCAUCGUCC	GGAUGAUGAUGAUGAGGAUGA	Cleavage	cDNA|retrotransposon protein, putative, Ty3-gypsy subclass, expressed
osa-miR169d	XLOC_020194	4.5	2351	2371	UAGCCAAGGAUGAAUUGCCGG	UAGAUAAUUCGUUAUUGGUUA	Cleavage		osa-miR414	LOC_Os09g38400.1	0.5	438	458	UCAUCCUCAUCAUCAUCGUCC	GGAUGAUGAUGAUGAGGAUGA	Cleavage	cDNA|prostatic spermine-binding protein precursor, putative, expressed
osa-miR169f.2	XLOC_049857	4.5	275	295	UGAGGACAAGAGCUGAUUCGG	GACAAUUAGCUCAUGUUUUUA	Cleavage		osa-miR414	LOC_Os05g26000.1	0.5	6000	6020	UCAUCCUCAUCAUCAUCGUCC	UGAUGAUGAUGAUGAGGAUGA	Cleavage	cDNA|retrotransposon protein, putative, unclassified, expressed
osa-miR172a	XLOC_014608	4.5	192	212	AGAAUCUUGAUGAUGCUGCAU	UGGCUGCAUCGCCAAGAUUUG	Translation		osa-miR414	LOC_Os06g42370.1	0.5	5607	5627	UCAUCCUCAUCAUCAUCGUCC	UGAUGAUGAUGAUGAGGAUGA	Cleavage	cDNA|retrotransposon protein, putative, unclassified, expressed
osa-miR172b	XLOC_014608	4.5	192	212	GGAAUCUUGAUGAUGCUGCAU	UGGCUGCAUCGCCAAGAUUUG	Translation		osa-miR414	LOC_Os07g33190.1	0.5	2817	2837	UCAUCCUCAUCAUCAUCGUCC	UGAUGAUGAUGAUGAGGAUGA	Cleavage	cDNA|retrotransposon protein, putative, unclassified, expressed
osa-miR172d-3p	XLOC_014608	4.5	192	212	AGAAUCUUGAUGAUGCUGCAU	UGGCUGCAUCGCCAAGAUUUG	Translation		osa-miR414	LOC_Os12g01290.1	0.5	1338	1358	UCAUCCUCAUCAUCAUCGUCC	UGAUGAUGAUGAUGAGGAUGA	Cleavage	cDNA|ulp1 protease family protein, putative, expressed
osa-miR1847.1	XLOC_043772	4.5	1532	1552	UGCAGUUUGCAGUUGUGGCAC	AUGCUGGAGCUGCAGUCUGCA	Cleavage		osa-miR414	LOC_Os01g16670.1	0.5	1239	1259	UCAUCCUCAUCAUCAUCGUCC	CGAUGAUGAUGAUGAGGAUGA	Cleavage	cDNA|BSD domain-containing protein, putative, expressed
osa-miR1850.1	XLOC_053362	4.5	1106	1126	UGGAAAGUUGGGAGAUUGGGG	CACAAAUCUCCCAACUCACUA	Cleavage		osa-miR414	LOC_Os04g13880.1	0.5	957	977	UCAUCCUCAUCAUCAUCGUCC	UGAUGAUGAUGAUGAGGAUGA	Cleavage	cDNA|retrotransposon protein, putative, unclassified, expressed
osa-miR1854-5p	XLOC_053362	4.5	3348	3368	UGGUGAAAUUUGUAGAUUGGA	AGGAAUUUAAAAAUUUUAUUA	Cleavage		osa-miR414	LOC_Os10g16520.1	0.5	711	731	UCAUCCUCAUCAUCAUCGUCC	UGAUGAUGAUGAUGAGGAUGA	Cleavage	cDNA|retrotransposon protein, putative, unclassified, expressed
osa-miR1861b	XLOC_034986	4.5	1804	1825	CGAUCUUGAGGCAGGAACUGAG	ACGAGUUCUUGCUUUCGGGUUG	Cleavage		osa-miR414	LOC_Os07g30050.1	0.5	738	758	UCAUCCUCAUCAUCAUCGUCC	UGAUGAUGAUGAUGAGGAUGA	Cleavage	cDNA|retrotransposon protein, putative, unclassified, expressed
osa-miR1861f	XLOC_034986	4.5	1804	1825	CGAUCUUGAGGCAGGAACUGAG	ACGAGUUCUUGCUUUCGGGUUG	Cleavage		osa-miR414	LOC_Os08g43480.2	0.5	743	763	UCAUCCUCAUCAUCAUCGUCC	UGAUGAUGAUGAUGAGGAUGA	Cleavage	cDNA|zinc finger, C3HC4 type family protein, expressed
osa-miR1861i	XLOC_034986	4.5	1804	1825	CGAUCUUGAGGCAGGAACUGAG	ACGAGUUCUUGCUUUCGGGUUG	Cleavage		osa-miR414	LOC_Os07g15480.1	0.5	1305	1325	UCAUCCUCAUCAUCAUCGUCC	UGAUGAUGAUGAUGAGGAUGA	Cleavage	cDNA|retrotransposon protein, putative, unclassified, expressed
osa-miR1861l	XLOC_034986	4.5	1804	1825	CGAUCUUGAGGCAGGAACUGAG	ACGAGUUCUUGCUUUCGGGUUG	Cleavage		osa-miR414	LOC_Os08g43480.1	0.5	633	653	UCAUCCUCAUCAUCAUCGUCC	UGAUGAUGAUGAUGAGGAUGA	Cleavage	cDNA|zinc finger, C3HC4 type family protein, expressed
osa-miR1862f	XLOC_018761	4.5	196	215	AUGAGGUUGGUUUAUUUUGG	UCAGAUUCAAUUAACUUCAU	Cleavage		osa-miR414	LOC_Os11g09150.1	0.5	578	598	UCAUCCUCAUCAUCAUCGUCC	CGAUGAUGAUGAUGAGGAUGA	Cleavage	cDNA|expressed protein
osa-miR1862g	XLOC_018761	4.5	196	215	AUGAGGUUGGUUUAUUUUGG	UCAGAUUCAAUUAACUUCAU	Cleavage		osa-miR414	LOC_Os11g41940.1	0.5	562	582	UCAUCCUCAUCAUCAUCGUCC	CGAUGAUGAUGAUGAGGAUGA	Cleavage	cDNA|expressed protein
osa-miR1863b	XLOC_030042	4.5	130	153	AGCUCUGAUACCAUGUUAACUGUU	UGCUAAUUACAUGGGAUCAGGGUU	Translation		osa-miR414	LOC_Os07g22450.1	0.5	165	185	UCAUCCUCAUCAUCAUCGUCC	UGACGAUGGUGAUGAGGAUGA	Cleavage	cDNA|NAC domain containing protein, putative, expressed
osa-miR1863b.2	XLOC_050893	4.5	2141	2163	AGAGACUUGGCUGAUGCAUUACU	AAUAAUGUAUCGGCUAAAGCUCU	Cleavage		osa-miR414	LOC_Os09g36300.2	0.5	1054	1074	UCAUCCUCAUCAUCAUCGUCC	UAAUGAUGAUGAUGAGGAUGA	Cleavage	cDNA|OsLonP4 - Putative Lon protease homologue, expressed
osa-miR1869	XLOC_043574	4.5	3024	3047	UGAGAACAAUAGGCAUGGGAGGUA	UAUUACCUAUUCUCAUUGUUCUUG	Translation		osa-miR414	LOC_Os09g36300.3	0.5	1167	1187	UCAUCCUCAUCAUCAUCGUCC	UAAUGAUGAUGAUGAGGAUGA	Cleavage	cDNA|OsLonP4 - Putative Lon protease homologue, expressed
osa-miR1883a	XLOC_001451	4.5	2529	2552	ACCUGUGACGGGCCGAGAAUGGAA	UAAUGUGUUUGGCACGUCAUGGGU	Translation		osa-miR414	LOC_Os09g36300.1	0.5	1054	1074	UCAUCCUCAUCAUCAUCGUCC	UAAUGAUGAUGAUGAGGAUGA	Cleavage	cDNA|OsLonP4 - Putative Lon protease homologue, expressed
osa-miR1883b	XLOC_001451	4.5	2529	2552	ACCUGUGACGGGCCGAGAAUGGAA	UAAUGUGUUUGGCACGUCAUGGGU	Translation		osa-miR414	LOC_Os09g36300.4	0.5	807	827	UCAUCCUCAUCAUCAUCGUCC	UAAUGAUGAUGAUGAGGAUGA	Cleavage	cDNA|OsLonP4 - Putative Lon protease homologue, expressed
osa-miR2090	XLOC_020194	4.5	3132	3153	AACUCUGAUUCUAGAAUUUUUG	UUUGGAUUCUAGAAUUACAGCU	Cleavage		osa-miR437	LOC_Os02g42350.1	0.5	1559	1579	AAAGUUAGAGAAGUUUGACUU	AAGUUAAACUUCUCUAACUUU	Cleavage	cDNA|nitrilase, putative, expressed
osa-miR2095-5p	XLOC_049857	4.5	445	466	CUGAUAAUUUUACGAUGAAUAG	GAUUUUAUUUUAAAAUUAUUGU	Cleavage		osa-miR437	LOC_Os06g46670.2	0.5	3855	3875	AAAGUUAGAGAAGUUUGACUU	AAGUCAAAUUUCUCUAACUUU	Cleavage	cDNA|glutamate receptor, putative, expressed
osa-miR2105	XLOC_043574	4.5	5030	5049	UUGUGAUGUGAAUGAUUCAU	UUGAAGUAUUUAAAUCGCGA	Cleavage		osa-miR444f	LOC_Os02g49840.1	0.5	613	633	UGCAGUUGUUGCCUCAAGCUU	AAGCUUGAGGCAGCAACUGCA	Cleavage	cDNA|OsMADS57 - MADS-box family gene with MIKCc type-box, expressed
osa-miR2118c	XLOC_020194	4.5	502	523	UUCCCGAUGCCUCCUAUUCCUA	GAAGAGGAGGAGGUGACGGGAG	Cleavage		osa-miR444f	LOC_Os02g49840.4	0.5	613	633	UGCAGUUGUUGCCUCAAGCUU	AAGCUUGAGGCAGCAACUGCA	Cleavage	cDNA|OsMADS57 - MADS-box family gene with MIKCc type-box, expressed
osa-miR2118o	XLOC_048354	4.5	4653	4674	CUCCUGAUGCCUCCCAAGCCUA	UGUGAUUGAGAGGCAUCAGUAA	Cleavage		osa-miR444f	LOC_Os02g49840.2	0.5	613	633	UGCAGUUGUUGCCUCAAGCUU	AAGCUUGAGGCAGCAACUGCA	Cleavage	cDNA|OsMADS57 - MADS-box family gene with MIKCc type-box, expressed
osa-miR2118q	XLOC_020194	4.5	502	523	UUCCCGAUGCCUCCUAUUCCUA	GAAGAGGAGGAGGUGACGGGAG	Cleavage		osa-miR444f	LOC_Os02g49840.3	0.5	613	633	UGCAGUUGUUGCCUCAAGCUU	AAGCUUGAGGCAGCAACUGCA	Cleavage	cDNA|OsMADS57 - MADS-box family gene with MIKCc type-box, expressed
osa-miR2122	XLOC_048525	4.5	1820	1841	UUUCAAAAAUAACCUUUUGUUC	GUUAAAAUGGGUAUUUUUGAAU	Cleavage		osa-miR444f	LOC_Os08g33488.1	0.5	311	331	UGCAGUUGUUGCCUCAAGCUU	AAGCUUGAGGCAGCAACUGCA	Cleavage	cDNA|OsMADS23 - MADS-box family gene with MIKCc type-box, expressed
osa-miR2863b	XLOC_029640	4.5	1417	1437	UUCGUUUAUUUGGACUAGAGU	UUUUUAGUUAAAGUAAACGGU	Cleavage		osa-miR5075	LOC_Os11g42440.1	0.5	108	128	UUCUCCGUCGCCGCCGUCCGC	CGGGACGGCGGCGGCGGAGAA	Cleavage	cDNA|expressed protein
osa-miR2863c	XLOC_054165	4.5	448	471	UUAGUAGGACUAGAAUGGGCCAAA	GUAGUACCAUUUUGAUCUUGCUAA	Translation		osa-miR5162	LOC_Os10g41920.1	0.5	1293	1316	AAAUGACCAAAAUACCCCUAGAAC	UAAUAAGGGGUGUUUUGGUCAUUU	Cleavage	cDNA|expressed protein
osa-miR2864.1	XLOC_039631	4.5	1578	1598	UUUUGCUGCCCUUGUUUUGCA	CACAAUACAAGGGAAGAAAGA	Cleavage		osa-miR529b	LOC_Os08g39890.1	0.5	987	1007	AGAAGAGAGAGAGUACAGCUU	GAGCUGUGCUCUCUCUCUUCU	Cleavage	cDNA|OsSPL14 - SBP-box gene family member, expressed
osa-miR2871a-3p	XLOC_001530	4.5	1071	1091	UAUUUUAGUUUCUAUGGUCAC	GAGAUUAUGGAGGAUAAGAUA	Cleavage		osa-miR529b	LOC_Os09g31438.1	0.5	804	824	AGAAGAGAGAGAGUACAGCUU	CAGCUGUGCUCUCUCUCUUCU	Cleavage	cDNA|OsSPL17 - SBP-box gene family member, expressed
osa-miR2871b	XLOC_001530	4.5	1071	1091	UAUUUUAGUUUCUAUGGUCAC	GAGAUUAUGGAGGAUAAGAUA	Cleavage		osa-miR5540	LOC_Os10g36130.1	0.5	151	171	UUGUGCGAGAUCGACGGUAUA	UAUACCGUCGGUCUCGCACAA	Cleavage	cDNA|hypothetical protein
osa-miR2873c	XLOC_053362	4.5	1344	1364	CAAAUGAAGUUGAGUUUGGAC	UUCCAAACUAAAAUUUAUUUU	Cleavage		osa-miR5799	LOC_Os12g38210.1	0.5	2476	2499	AAGACGAAUAAUCAAACGUUGGAC	GUCUAACGUUUGAUUGUUCGUCUU	Cleavage	cDNA|spotted leaf 11, putative, expressed
osa-miR2922	XLOC_054197	4.5	58	77	AAUAAGUGAUUACCGAAAUU	AAUUUAAGUAAUUAUUAAUU	Cleavage		osa-miR5799	LOC_Os07g26595.1	0.5	135	158	AAGACGAAUAAUCAAACGUUGGAC	UAAAUACGUUUGAUUGUUCGUCUU	Cleavage	cDNA|expressed protein
osa-miR2931	XLOC_049807	4.5	107	126	CUUUAUUGUUGAUGUCAAAA	UUAGGUUAUUAACAAUAGAG	Cleavage		osa-miR5830	LOC_Os01g64900.1	0.5	1831	1854	AUGUAGAUGAGGUGAUGUUACACA	UCUGCAACAUCAUCUCAUCUACAU	Cleavage	cDNA|HEAT, putative, expressed
osa-miR395a	XLOC_029640	4.5	871	891	GUGAAGUGCUUGGGGGAACUC	UAGUUCUCCAAAGUGCCUCAC	Cleavage		osa-miR6249a	LOC_Os08g14050.1	0.5	460	479	CGUGAAGAGCUCGCCGGCGG	CUGCCGGCGAGCUCUUCACG	Cleavage	cDNA|expressed protein
osa-miR395x	XLOC_035128	4.5	1071	1091	GUGAAGUGUUUGGAGUAGCUC	UAGCUACUCCAGCUGUUUCAG	Cleavage		osa-miR6249a	LOC_Os06g48730.1	0.5	468	487	CGUGAAGAGCUCGCCGGCGG	CCGUCGGCGAGCUCUUCACG	Cleavage	cDNA|transposon protein, putative, CACTA, En/Spm sub-class, expressed
osa-miR3979-3p	XLOC_000467	4.5	1672	1690	CUUCGGGGGAGGAGAGAAGC	UCUUCUCUC-UCCCUUGGAG	Translation		osa-miR6249b	LOC_Os08g14050.1	0.5	460	479	CGUGAAGAGCUCGCCGGCGG	CUGCCGGCGAGCUCUUCACG	Cleavage	cDNA|expressed protein
osa-miR415	XLOC_057717	4.5	201	220	AACAGAACAGAAGCAGAGCAG	UUGCUG-GUUUCUGUUCUGUC	Cleavage		osa-miR6249b	LOC_Os06g48730.1	0.5	468	487	CGUGAAGAGCUCGCCGGCGG	CCGUCGGCGAGCUCUUCACG	Cleavage	cDNA|transposon protein, putative, CACTA, En/Spm sub-class, expressed
osa-miR435	XLOC_054207	4.5	231	250	UUAUCCGGUAUUGGAGUUGA	UGAGCCCCAAUGCCCGAUAA	Cleavage		osa-miR812a	LOC_Os02g23823.2	0.5	388	409	GACGGACGGUUAAACGUUGGAC	GUCCAACGUUUGACCGUCCGUC	Cleavage	cDNA|helix-loop-helix DNA-binding domain containing protein, expressed
osa-miR444b.2	XLOC_029640	4.5	652	672	UGCAGUUGUUGUCUCAAGCUU	GUGUUUGUGUUAAUGACUGCA	Cleavage		osa-miR812a	LOC_Os07g26690.1	0.5	1326	1347	GACGGACGGUUAAACGUUGGAC	GUUCAACGUUUGACCGUCCGUC	Cleavage	cDNA|aquaporin protein, putative, expressed
osa-miR444c.2	XLOC_029640	4.5	652	672	UGCAGUUGUUGUCUCAAGCUU	GUGUUUGUGUUAAUGACUGCA	Cleavage		osa-miR812a	LOC_Os07g26690.2	0.5	1450	1471	GACGGACGGUUAAACGUUGGAC	GUUCAACGUUUGACCGUCCGUC	Cleavage	cDNA|aquaporin protein, putative, expressed
osa-miR444f	XLOC_029640	4.5	652	672	UGCAGUUGUUGCCUCAAGCUU	GUGUUUGUGUUAAUGACUGCA	Cleavage		osa-miR812a	LOC_Os03g22050.4	0.5	1922	1943	GACGGACGGUUAAACGUUGGAC	GCUCAACGUUUGACCGUCCGUC	Cleavage	cDNA|CAMK_KIN1/SNF1/Nim1_like.16 - CAMK includes calcium/calmodulin depedent protein kinases, expressed
osa-miR5079a	XLOC_001451	4.5	3180	3201	UUUGGAUCUGUUAUUUUGGUAU	AAACUAAGUUCACGGAUCUAAA	Cleavage		osa-miR812a	LOC_Os03g22050.3	0.5	2877	2898	GACGGACGGUUAAACGUUGGAC	GCUCAACGUUUGACCGUCCGUC	Cleavage	cDNA|CAMK_KIN1/SNF1/Nim1_like.16 - CAMK includes calcium/calmodulin depedent protein kinases, expressed
osa-miR5079b	XLOC_001451	4.5	3180	3201	UUUGGAUCUGUUAUUUUGGUAU	AAACUAAGUUCACGGAUCUAAA	Cleavage		osa-miR812a	LOC_Os03g22050.2	0.5	2908	2929	GACGGACGGUUAAACGUUGGAC	GCUCAACGUUUGACCGUCCGUC	Cleavage	cDNA|CAMK_KIN1/SNF1/Nim1_like.16 - CAMK includes calcium/calmodulin depedent protein kinases, expressed
osa-miR5082	XLOC_048525	4.5	75	98	UGCGAUGAUGGCCGCGCGGGUUCA	UCUCCAUGUCCGGCCAUCAUUGCC	Cleavage		osa-miR812a	LOC_Os03g22050.1	0.5	2914	2935	GACGGACGGUUAAACGUUGGAC	GCUCAACGUUUGACCGUCCGUC	Cleavage	cDNA|CAMK_KIN1/SNF1/Nim1_like.16 - CAMK includes calcium/calmodulin depedent protein kinases, expressed
osa-miR5083	XLOC_030042	4.5	295	314	AGACUACAAUUAUCUGAUCA	UGAUGGGAUAAUUGCAGUAU	Cleavage		osa-miR812b	LOC_Os02g23823.2	0.5	388	409	GACGGACGGUUAAACGUUGGAC	GUCCAACGUUUGACCGUCCGUC	Cleavage	cDNA|helix-loop-helix DNA-binding domain containing protein, expressed
osa-miR5144-3p	XLOC_048525	4.5	395	415	UCUCCUCAGCAGCACAAGAAG	UCUCUGUUGUUGCUCGGGAGA	Cleavage		osa-miR812b	LOC_Os07g26690.1	0.5	1326	1347	GACGGACGGUUAAACGUUGGAC	GUUCAACGUUUGACCGUCCGUC	Cleavage	cDNA|aquaporin protein, putative, expressed
osa-miR5145	XLOC_001451	4.5	3183	3206	ACCUGUUUGGAUUCUUGAGGGCUA	CUAAGUUCACGGAUCUAAACGUGU	Cleavage		osa-miR812b	LOC_Os07g26690.2	0.5	1450	1471	GACGGACGGUUAAACGUUGGAC	GUUCAACGUUUGACCGUCCGUC	Cleavage	cDNA|aquaporin protein, putative, expressed
osa-miR5151	XLOC_034986	4.5	1886	1907	UAAUGAUGUGGGUACGAAUGAA	GGGAUUAGUGCUUCCAUCGUUA	Cleavage		osa-miR812b	LOC_Os03g22050.4	0.5	1922	1943	GACGGACGGUUAAACGUUGGAC	GCUCAACGUUUGACCGUCCGUC	Cleavage	cDNA|CAMK_KIN1/SNF1/Nim1_like.16 - CAMK includes calcium/calmodulin depedent protein kinases, expressed
osa-miR5160	XLOC_035696	4.5	60	81	CGAGAUCGAUGGUAUAUUUCUG	AGUAAAUAUUUCAUUGAUGUUG	Cleavage		osa-miR812b	LOC_Os03g22050.3	0.5	2877	2898	GACGGACGGUUAAACGUUGGAC	GCUCAACGUUUGACCGUCCGUC	Cleavage	cDNA|CAMK_KIN1/SNF1/Nim1_like.16 - CAMK includes calcium/calmodulin depedent protein kinases, expressed
osa-miR528-5p	XLOC_020194	4.5	250	270	UGGAAGGGGCAUGCAGAGGAG	UUCCCCUACUUGCCCCUUCCU	Cleavage		osa-miR812b	LOC_Os03g22050.2	0.5	2908	2929	GACGGACGGUUAAACGUUGGAC	GCUCAACGUUUGACCGUCCGUC	Cleavage	cDNA|CAMK_KIN1/SNF1/Nim1_like.16 - CAMK includes calcium/calmodulin depedent protein kinases, expressed
osa-miR529b	XLOC_014436	4.5	630	649	AGAAGAGAGAGAGUACAGCUU	CAGUUGU-UUUUCUUUCUUUU	Cleavage		osa-miR812b	LOC_Os03g22050.1	0.5	2914	2935	GACGGACGGUUAAACGUUGGAC	GCUCAACGUUUGACCGUCCGUC	Cleavage	cDNA|CAMK_KIN1/SNF1/Nim1_like.16 - CAMK includes calcium/calmodulin depedent protein kinases, expressed
osa-miR5490	XLOC_048354	4.5	3650	3670	UUGGAUUUUUAUUUAGGACGG	AUGUAUGGAAUGAAGAUCCAG	Cleavage		osa-miR812c	LOC_Os02g23823.2	0.5	388	409	GACGGACGGUUAAACGUUGGAC	GUCCAACGUUUGACCGUCCGUC	Cleavage	cDNA|helix-loop-helix DNA-binding domain containing protein, expressed
osa-miR5508	XLOC_043574	4.5	1197	1217	UAGAUGGCUGAUCUGGUGUGG	AAACUCCAUACCAGCCAUUUA	Translation		osa-miR812c	LOC_Os07g26690.1	0.5	1326	1347	GACGGACGGUUAAACGUUGGAC	GUUCAACGUUUGACCGUCCGUC	Cleavage	cDNA|aquaporin protein, putative, expressed
osa-miR5523	XLOC_001451	4.5	3806	3827	UGAGGAGGAACAUAUUUACUAG	UGAGAGAAUGUGUUCUACCUCG	Cleavage		osa-miR812c	LOC_Os07g26690.2	0.5	1450	1471	GACGGACGGUUAAACGUUGGAC	GUUCAACGUUUGACCGUCCGUC	Cleavage	cDNA|aquaporin protein, putative, expressed
osa-miR5530	XLOC_053362	4.5	3219	3239	AGUGGUGUCGUAUUACCUGCC	CACAUGACAUAUGGCAUCACU	Cleavage		osa-miR812c	LOC_Os03g22050.4	0.5	1922	1943	GACGGACGGUUAAACGUUGGAC	GCUCAACGUUUGACCGUCCGUC	Cleavage	cDNA|CAMK_KIN1/SNF1/Nim1_like.16 - CAMK includes calcium/calmodulin depedent protein kinases, expressed
osa-miR5531	XLOC_030829	4.5	807	828	ACUGACUGCCUUGAGCUCCGGG	CCGGAAGGUCAAGGAAGUUGGU	Cleavage		osa-miR812c	LOC_Os03g22050.3	0.5	2877	2898	GACGGACGGUUAAACGUUGGAC	GCUCAACGUUUGACCGUCCGUC	Cleavage	cDNA|CAMK_KIN1/SNF1/Nim1_like.16 - CAMK includes calcium/calmodulin depedent protein kinases, expressed
osa-miR5534b	XLOC_030118	4.5	604	624	CGAUGACAACAGCUAGAAUGG	CUAUAUGGGUUGUUGUUAUUG	Cleavage		osa-miR812c	LOC_Os03g22050.2	0.5	2908	2929	GACGGACGGUUAAACGUUGGAC	GCUCAACGUUUGACCGUCCGUC	Cleavage	cDNA|CAMK_KIN1/SNF1/Nim1_like.16 - CAMK includes calcium/calmodulin depedent protein kinases, expressed
osa-miR5537	XLOC_020194	4.5	2976	2997	AAUGUUUGUAUGGAUCGUUUGU	CAAAGAGGUUCAUACAAGUAUA	Cleavage		osa-miR812c	LOC_Os03g22050.1	0.5	2914	2935	GACGGACGGUUAAACGUUGGAC	GCUCAACGUUUGACCGUCCGUC	Cleavage	cDNA|CAMK_KIN1/SNF1/Nim1_like.16 - CAMK includes calcium/calmodulin depedent protein kinases, expressed
osa-miR5789	XLOC_039631	4.5	1036	1056	UGACUGAGCUUCGUUCGGUAU	AGAACGAAGGGAGUUUAGUCG	Cleavage		osa-miR812d	LOC_Os02g23823.2	0.5	388	409	GACGGACGGUUAAACGUUGGAC	GUCCAACGUUUGACCGUCCGUC	Cleavage	cDNA|helix-loop-helix DNA-binding domain containing protein, expressed
osa-miR5792	XLOC_043772	4.5	599	622	GAUGACAGCGGUGGUUCGGACAUC	CUCGUCACCACCACCGCUGUCUUC	Cleavage		osa-miR812d	LOC_Os07g26690.1	0.5	1326	1347	GACGGACGGUUAAACGUUGGAC	GUUCAACGUUUGACCGUCCGUC	Cleavage	cDNA|aquaporin protein, putative, expressed
osa-miR5815	XLOC_029640	4.5	1187	1210	AAUGUUAUGGACACUAGAUGACAU	UUCUCAUAUCCUGUCCAUGACAUC	Cleavage		osa-miR812d	LOC_Os07g26690.2	0.5	1450	1471	GACGGACGGUUAAACGUUGGAC	GUUCAACGUUUGACCGUCCGUC	Cleavage	cDNA|aquaporin protein, putative, expressed
osa-miR5817	XLOC_050893	4.5	629	652	AUCGAAUUUGAAAGAAAAAGGUAU	AUUCGAUUUCCUUUUGAAUUUGAA	Cleavage		osa-miR812d	LOC_Os03g22050.4	0.5	1922	1943	GACGGACGGUUAAACGUUGGAC	GCUCAACGUUUGACCGUCCGUC	Cleavage	cDNA|CAMK_KIN1/SNF1/Nim1_like.16 - CAMK includes calcium/calmodulin depedent protein kinases, expressed
osa-miR5823	XLOC_031311	4.5	49	72	AAGGAAUUGGGUCUAAUCUCUUCC	ACCUCCGACUCGACCCAAUGCCUU	Cleavage		osa-miR812d	LOC_Os03g22050.3	0.5	2877	2898	GACGGACGGUUAAACGUUGGAC	GCUCAACGUUUGACCGUCCGUC	Cleavage	cDNA|CAMK_KIN1/SNF1/Nim1_like.16 - CAMK includes calcium/calmodulin depedent protein kinases, expressed
osa-miR5824	XLOC_053362	4.5	3003	3026	AGUCUGAUAAGAAGUCAAUGGCGU	UGUAAUUUGUUUUAUUAUUAGACU	Translation		osa-miR812d	LOC_Os03g22050.2	0.5	2908	2929	GACGGACGGUUAAACGUUGGAC	GCUCAACGUUUGACCGUCCGUC	Cleavage	cDNA|CAMK_KIN1/SNF1/Nim1_like.16 - CAMK includes calcium/calmodulin depedent protein kinases, expressed
osa-miR5829	XLOC_002582	4.5	1429	1452	AUCAGGACCAGUAGGCGAUGGUAA	CACAUUUUGCUUGCUGGUCCUUGU	Cleavage		osa-miR812d	LOC_Os03g22050.1	0.5	2914	2935	GACGGACGGUUAAACGUUGGAC	GCUCAACGUUUGACCGUCCGUC	Cleavage	cDNA|CAMK_KIN1/SNF1/Nim1_like.16 - CAMK includes calcium/calmodulin depedent protein kinases, expressed
osa-miR5832	XLOC_043574	4.5	948	968	UUGGCGGAGCGGUUGCUGUCA	UGAUCCUAGCCGCUCCGCCAC	Cleavage		osa-miR812e	LOC_Os02g23823.2	0.5	388	409	GACGGACGGUUAAACGUUGGAC	GUCCAACGUUUGACCGUCCGUC	Cleavage	cDNA|helix-loop-helix DNA-binding domain containing protein, expressed
osa-miR812f	XLOC_053362	4.5	2412	2435	ACGGAUGAUUAAAGUUGGACACGG	AUCUAUUCACCUUUAAUUAUUUAU	Cleavage		osa-miR812e	LOC_Os07g26690.1	0.5	1326	1347	GACGGACGGUUAAACGUUGGAC	GUUCAACGUUUGACCGUCCGUC	Cleavage	cDNA|aquaporin protein, putative, expressed
osa-miR812k	XLOC_054197	4.5	23	46	ACGAACGGUUAAAGUUGGACGCGG	UUUAGCACAUGUUUGACCGUUCGU	Cleavage		osa-miR812e	LOC_Os07g26690.2	0.5	1450	1471	GACGGACGGUUAAACGUUGGAC	GUUCAACGUUUGACCGUCCGUC	Cleavage	cDNA|aquaporin protein, putative, expressed
osa-miR812l	XLOC_054197	4.5	23	46	ACGAACGGUUAAAGUUGGACGCGG	UUUAGCACAUGUUUGACCGUUCGU	Cleavage		osa-miR812e	LOC_Os03g22050.4	0.5	1922	1943	GACGGACGGUUAAACGUUGGAC	GCUCAACGUUUGACCGUCCGUC	Cleavage	cDNA|CAMK_KIN1/SNF1/Nim1_like.16 - CAMK includes calcium/calmodulin depedent protein kinases, expressed
osa-miR812m	XLOC_054197	4.5	23	46	ACGAACGGUUAAAGUUGGACGCGG	UUUAGCACAUGUUUGACCGUUCGU	Cleavage		osa-miR812e	LOC_Os03g22050.3	0.5	2877	2898	GACGGACGGUUAAACGUUGGAC	GCUCAACGUUUGACCGUCCGUC	Cleavage	cDNA|CAMK_KIN1/SNF1/Nim1_like.16 - CAMK includes calcium/calmodulin depedent protein kinases, expressed
osa-miR1320-5p	XLOC_040912	5	404	424	UGGAACGGAGGAAUUUUAUAG	UAGUUAAAUUUGUUCGUUCCU	Translation		osa-miR812e	LOC_Os03g22050.2	0.5	2908	2929	GACGGACGGUUAAACGUUGGAC	GCUCAACGUUUGACCGUCCGUC	Cleavage	cDNA|CAMK_KIN1/SNF1/Nim1_like.16 - CAMK includes calcium/calmodulin depedent protein kinases, expressed
osa-miR1429-3p	XLOC_048525	5	2745	2765	GUUGCACGGGUUUGUAUGUUG	GUAUGAACGAACUUGUGUAAA	Cleavage		osa-miR812e	LOC_Os03g22050.1	0.5	2914	2935	GACGGACGGUUAAACGUUGGAC	GCUCAACGUUUGACCGUCCGUC	Cleavage	cDNA|CAMK_KIN1/SNF1/Nim1_like.16 - CAMK includes calcium/calmodulin depedent protein kinases, expressed
osa-miR1432-3p	XLOC_030829	5	779	799	CAGGUGUCAUCUCCCCUGAAC	AUGUAUGGGGGCUGACGCCUG	Translation		osa-miR812g	LOC_Os02g07960.4	0.5	3484	3507	AAGACGGAUGAUUAAAGUUGGACA	UGCCCAACUUUAAUCGUCCGUCUU	Cleavage	cDNA|STRUBBELIG-RECEPTOR FAMILY 3 precursor, putative, expressed
osa-miR1437b-5p	XLOC_043574	5	1589	1609	GGGAGGAAACAGUGCCUAGUG	GGCAAGUUAUUAUUUCCUCUC	Translation		osa-miR812g	LOC_Os04g47140.1	0.5	658	681	AAGACGGAUGAUUAAAGUUGGACA	CGCCCAACUUUGAUCAUCCGUCUU	Cleavage	cDNA|expressed protein
osa-miR1439	XLOC_035558	5	391	411	UUUUGGAACGGAGUGAGUAUU	ACUCCUCCCUUUGUUCUAACA	Cleavage		osa-miR812h	LOC_Os02g07960.4	0.5	3484	3507	AAGACGGAUGAUUAAAGUUGGACA	UGCCCAACUUUAAUCGUCCGUCUU	Cleavage	cDNA|STRUBBELIG-RECEPTOR FAMILY 3 precursor, putative, expressed
osa-miR1441	XLOC_057717	5	287	307	ACCGGAUGUCGGAAAAGGUUU	AAACAAUUUACGGCGUCUGGU	Cleavage		osa-miR812h	LOC_Os04g47140.1	0.5	658	681	AAGACGGAUGAUUAAAGUUGGACA	CGCCCAACUUUGAUCAUCCGUCUU	Cleavage	cDNA|expressed protein
osa-miR160f-3p	XLOC_002582	5	1404	1424	GCAUUGAGGGAGUCAUGCAGG	UUUGUCUUACUCCCUCGGUCC	Cleavage		osa-miR812i	LOC_Os02g07960.4	0.5	3484	3507	AAGACGGAUGAUUAAAGUUGGACA	UGCCCAACUUUAAUCGUCCGUCUU	Cleavage	cDNA|STRUBBELIG-RECEPTOR FAMILY 3 precursor, putative, expressed
osa-miR166k-5p	XLOC_040359	5	214	234	GGUUUGUUGUCUGGCUCGAGG	CAACAAGCCACACAACAAAUA	Translation		osa-miR812i	LOC_Os04g47140.1	0.5	658	681	AAGACGGAUGAUUAAAGUUGGACA	CGCCCAACUUUGAUCAUCCGUCUU	Cleavage	cDNA|expressed protein
osa-miR166l-5p	XLOC_001451	5	1529	1549	GGAUUGUUGUCUGGUUCAAGG	GCUUAACCAAGACAACUAUCC	Cleavage		osa-miR812j	LOC_Os02g07960.4	0.5	3484	3507	AAGACGGAUGAUUAAAGUUGGACA	UGCCCAACUUUAAUCGUCCGUCUU	Cleavage	cDNA|STRUBBELIG-RECEPTOR FAMILY 3 precursor, putative, expressed
osa-miR169n	XLOC_020194	5	2351	2371	UAGCCAAGAAUGACUUGCCUA	UAGAUAAUUCGUUAUUGGUUA	Cleavage		osa-miR812j	LOC_Os04g47140.1	0.5	658	681	AAGACGGAUGAUUAAAGUUGGACA	CGCCCAACUUUGAUCAUCCGUCUU	Cleavage	cDNA|expressed protein
osa-miR169o	XLOC_020194	5	2351	2371	UAGCCAAGAAUGACUUGCCUA	UAGAUAAUUCGUUAUUGGUUA	Cleavage		osa-miR812s	LOC_Os12g38210.1	0.5	2476	2499	AAGACGGACAAUCAAACGUUGGAC	GUCUAACGUUUGAUUGUUCGUCUU	Cleavage	cDNA|spotted leaf 11, putative, expressed
osa-miR169q	XLOC_050893	5	2919	2939	UAGCCAAGGAGACUGCCCAUG	UUUGGCUAGUCUCCCAGGCUG	Cleavage		osa-miR812s	LOC_Os08g06478.1	0.5	1388	1411	AAGACGGACAAUCAAACGUUGGAC	UUUCCAUGUUUGAUUGUCCGUCUU	Cleavage	cDNA|expressed protein
osa-miR171c-5p	XLOC_034986	5	1821	1841	GGAUAUUGGUGCGGUUCAAUC	GGUUGAGCUGCAUCGGUUUCA	Cleavage		osa-miR812s	LOC_Os07g26595.1	0.5	135	158	AAGACGGACAAUCAAACGUUGGAC	UAAAUACGUUUGAUUGUUCGUCUU	Cleavage	cDNA|expressed protein
osa-miR171d-5p	XLOC_053362	5	4458	4478	UGUUGGCCCGGCUCACUCAGA	CCUGGGUUGGUGGGGCCAGCG	Translation		osa-miR1438	LOC_Os11g04030.4	1	915	936	AGGGUAAUUUUAUCAUUUUUAA	UCAAGGAUGAUAAAAUUACCCU	Cleavage	cDNA|major facilitator superfamily antiporter, putative, expressed
osa-miR171f-5p	XLOC_024018	5	566	586	UGUUGGCAUGGUUCAAUCAAA	GUGGAUUGAAUUAAGUUAAUA	Cleavage		osa-miR156a	LOC_Os11g30370.1	1	1091	1110	UGACAGAAGAGAGUGAGCAC	GUGCUCUCUCUCUUCUGUCA	Cleavage	cDNA|OsSPL19 - SBP-box gene family member, expressed
osa-miR172d-5p	XLOC_030118	5	492	512	GCA-GCACCAUCAAGAUUCAC	GUGAUUGUUGAUGGUGCAUGC	Cleavage		osa-miR156a	LOC_Os09g32944.1	1	1034	1053	UGACAGAAGAGAGUGAGCAC	GUGCUCUCUCUCUUCUGUCA	Cleavage	cDNA|OsSPL18 - SBP-box gene family member, expressed
osa-miR1846e	XLOC_047008	5	496	515	CAACGAGGAGGCCGGGACCA	CCGUCCGGCCCUCCUCGUCG	Cleavage		osa-miR156a	LOC_Os09g31438.1	1	809	828	UGACAGAAGAGAGUGAGCAC	GUGCUCUCUCUCUUCUGUCA	Cleavage	cDNA|OsSPL17 - SBP-box gene family member, expressed
osa-miR1847.2	XLOC_040912	5	174	197	UGGCCCACAUGUUAGUGCCACAAC	GUUGAGUCACUGGCAUAUGGGUCC	Cleavage		osa-miR156a	LOC_Os06g45310.1	1	854	873	UGACAGAAGAGAGUGAGCAC	GUGCUCUCUCUCUUCUGUCA	Cleavage	cDNA|OsSPL11 - SBP-box gene family member, expressed
osa-miR1849	XLOC_000467	5	1165	1185	UAUCGUAUCCUAGGUUGGUUU	AAAAUAACUUAUGAUACGAAA	Translation		osa-miR156a	LOC_Os04g46580.1	1	818	837	UGACAGAAGAGAGUGAGCAC	GUGCUCUCUCUCUUCUGUCA	Cleavage	cDNA|OsSPL7 - SBP-box gene family member, expressed
osa-miR1850.3	XLOC_050893	5	2682	2703	CUGUUUAGUUCACAUCAAUCUU	CGAAUCCAUCUGAAGUAAACAG	Cleavage		osa-miR156a	LOC_Os02g07780.1	1	987	1006	UGACAGAAGAGAGUGAGCAC	GUGCUCUCUCUCUUCUGUCA	Cleavage	cDNA|OsSPL4 - SBP-box gene family member, expressed
osa-miR1851	XLOC_043574	5	2382	2402	CGUCUGGGAUGGCAUUUUGGC	UGCAUAAAGACAUCCCAGGCU	Cleavage		osa-miR156a	LOC_Os08g41940.1	1	1054	1073	UGACAGAAGAGAGUGAGCAC	GUGCUCUCUCUCUUCUGUCA	Cleavage	cDNA|OsSPL16 - SBP-box gene family member, expressed
osa-miR1852	XLOC_034986	5	876	896	AUAUGGAUUCAGAAUGCAGGU	AAUUACCAUUUGAAUUUAUAU	Cleavage		osa-miR156a	LOC_Os08g39890.1	1	992	1011	UGACAGAAGAGAGUGAGCAC	GUGCUCUCUCUCUUCUGUCA	Cleavage	cDNA|OsSPL14 - SBP-box gene family member, expressed
osa-miR1853-3p	XLOC_034986	5	859	880	UAAUUGGGGAUGUUCGGUUGCU	UUUAUUUGAAUUUCCUUAAUUA	Translation		osa-miR156a	LOC_Os01g69830.1	1	1153	1172	UGACAGAAGAGAGUGAGCAC	GUGCUCUCUCUCUUCUGUCA	Cleavage	cDNA|OsSPL2 - SBP-box gene family member, expressed
osa-miR1854-3p	XLOC_033277	5	553	573	UCCAAUUUGGGGAUUUGCUGAU	GUCAUCGA-UCCCCAGAUUGGU	Cleavage		osa-miR156a	LOC_Os06g49010.3	1	1439	1458	UGACAGAAGAGAGUGAGCAC	GUGCUCUCUCUCUUCUGUCA	Cleavage	cDNA|OsSPL12 - SBP-box gene family member, expressed
osa-miR1861c	XLOC_034986	5	1804	1825	CGAUCUUGUAGCAAGAACUGAG	ACGAGUUCUUGCUUUCGGGUUG	Cleavage		osa-miR156a	LOC_Os06g49010.2	1	1494	1513	UGACAGAAGAGAGUGAGCAC	GUGCUCUCUCUCUUCUGUCA	Cleavage	cDNA|OsSPL12 - SBP-box gene family member, expressed
osa-miR1861h	XLOC_034986	5	1804	1825	CGGUCUUGAGGCAGGAACUGAG	ACGAGUUCUUGCUUUCGGGUUG	Cleavage		osa-miR156a	LOC_Os06g49010.4	1	1638	1657	UGACAGAAGAGAGUGAGCAC	GUGCUCUCUCUCUUCUGUCA	Cleavage	cDNA|OsSPL12 - SBP-box gene family member, expressed
osa-miR1861j	XLOC_034986	5	1804	1825	CGGUCUUGAGGCAGGAACUGAG	ACGAGUUCUUGCUUUCGGGUUG	Cleavage		osa-miR156a	LOC_Os06g49010.1	1	1686	1705	UGACAGAAGAGAGUGAGCAC	GUGCUCUCUCUCUUCUGUCA	Cleavage	cDNA|OsSPL12 - SBP-box gene family member, expressed
osa-miR1864	XLOC_043574	5	5097	5120	UUGUAGUAACGUGAUGGUCAAUGU	CGACAAACUAUCACGGUAUUAUGG	Cleavage		osa-miR156a	LOC_Os06g49010.6	1	1842	1861	UGACAGAAGAGAGUGAGCAC	GUGCUCUCUCUCUUCUGUCA	Cleavage	cDNA|OsSPL12 - SBP-box gene family member, expressed
osa-miR1865-3p	XLOC_029970	5	860	882	CGAAGAAUCGCAGUCACUAGUUGU	GUAGGUAAUGACUG-GGUUUUUCG	Translation		osa-miR156a	LOC_Os06g49010.5	1	2018	2037	UGACAGAAGAGAGUGAGCAC	GUGCUCUCUCUCUUCUGUCA	Cleavage	cDNA|OsSPL12 - SBP-box gene family member, expressed
osa-miR1872	XLOC_000467	5	644	667	GAACUGUAAGUCUGUGACGGGUAA	AGUGUCGUGACAGAAUUCCAGUUG	Translation		osa-miR156a	LOC_Os02g07780.2	1	2221	2240	UGACAGAAGAGAGUGAGCAC	GUGCUCUCUCUCUUCUGUCA	Cleavage	cDNA|OsSPL4 - SBP-box gene family member, expressed
osa-miR1876	XLOC_048354	5	1337	1359	AUAAGUGGGUUUGUGGGCUGGCCC	AUACUAGCC-ACAUAUCCACUUAA	Translation		osa-miR156a	LOC_Os07g32170.2	1	664	683	UGACAGAAGAGAGUGAGCAC	AUGCUCCCUCUCUUCUGUCA	Cleavage	cDNA|OsSPL13 - SBP-box gene family member, expressed
osa-miR1881	XLOC_050893	5	432	455	AAUGUUAUUGUAGCGUGGUGGUGU	GGUGGGCCCCUCUAUAGUAACCUU	Cleavage		osa-miR156a	LOC_Os07g32170.1	1	852	871	UGACAGAAGAGAGUGAGCAC	AUGCUCCCUCUCUUCUGUCA	Cleavage	cDNA|OsSPL13 - SBP-box gene family member, expressed
osa-miR1882e-3p	XLOC_048525	5	1754	1776	GAAAUGAUCUUGGACGUAAUCUAG	AAAGAU-ACAUUUGAGAUCAUUUU	Cleavage		osa-miR156a	LOC_Os02g04680.2	1	1962	1981	UGACAGAAGAGAGUGAGCAC	AUGCUCUCUCUCUUCUGUCA	Cleavage	cDNA|OsSPL3 - SBP-box gene family member, expressed
osa-miR2055	XLOC_050893	5	2747	2767	UUUCCUUGGGAAGGUGGUUUC	AAAAUCACUUUCUAAAAGGAA	Cleavage		osa-miR156a	LOC_Os02g04680.1	1	1965	1984	UGACAGAAGAGAGUGAGCAC	AUGCUCUCUCUCUUCUGUCA	Cleavage	cDNA|OsSPL3 - SBP-box gene family member, expressed
osa-miR2093-5p	XLOC_045515	5	969	988	GUGCAUUAAUUGGAAGAACA	UAUAUUUCCACUUGAUGUAC	Translation		osa-miR156b-5p	LOC_Os11g30370.1	1	1091	1110	UGACAGAAGAGAGUGAGCAC	GUGCUCUCUCUCUUCUGUCA	Cleavage	cDNA|OsSPL19 - SBP-box gene family member, expressed
osa-miR2096-3p	XLOC_001530	5	386	406	CCUGAGGGGAAAUCGGCGGGA	GGCCAUUGGUUUCCUUUCUGG	Cleavage		osa-miR156b-5p	LOC_Os09g32944.1	1	1034	1053	UGACAGAAGAGAGUGAGCAC	GUGCUCUCUCUCUUCUGUCA	Cleavage	cDNA|OsSPL18 - SBP-box gene family member, expressed
osa-miR2101-3p	XLOC_043574	5	4037	4058	AUUUAACUCAAGUGAGCAUUGU	UUGAUGAUUAUUUCAGUUGAAA	Cleavage		osa-miR156b-5p	LOC_Os09g31438.1	1	809	828	UGACAGAAGAGAGUGAGCAC	GUGCUCUCUCUCUUCUGUCA	Cleavage	cDNA|OsSPL17 - SBP-box gene family member, expressed
osa-miR2102-5p	XLOC_035128	5	137	156	GGGCAAGCCGCCGCCGCCAC	CUGGUGGUGGCGGCUAGCGA	Cleavage		osa-miR156b-5p	LOC_Os06g45310.1	1	854	873	UGACAGAAGAGAGUGAGCAC	GUGCUCUCUCUCUUCUGUCA	Cleavage	cDNA|OsSPL11 - SBP-box gene family member, expressed
osa-miR2118b	XLOC_048354	5	4653	4674	UUCCCGAUGCCUCCCAUUCCUA	UGUGAUUGAGAGGCAUCAGUAA	Cleavage		osa-miR156b-5p	LOC_Os04g46580.1	1	818	837	UGACAGAAGAGAGUGAGCAC	GUGCUCUCUCUCUUCUGUCA	Cleavage	cDNA|OsSPL7 - SBP-box gene family member, expressed
osa-miR2118g	XLOC_048354	5	4653	4674	UUCCUAAUGCCUCCCAUUCCUA	UGUGAUUGAGAGGCAUCAGUAA	Cleavage		osa-miR156b-5p	LOC_Os02g07780.1	1	987	1006	UGACAGAAGAGAGUGAGCAC	GUGCUCUCUCUCUUCUGUCA	Cleavage	cDNA|OsSPL4 - SBP-box gene family member, expressed
osa-miR2118n	XLOC_048354	5	4653	4674	UUCCCGAUGCCUCCCAUUCCUA	UGUGAUUGAGAGGCAUCAGUAA	Cleavage		osa-miR156b-5p	LOC_Os08g41940.1	1	1054	1073	UGACAGAAGAGAGUGAGCAC	GUGCUCUCUCUCUUCUGUCA	Cleavage	cDNA|OsSPL16 - SBP-box gene family member, expressed
osa-miR2275d	XLOC_031311	5	296	317	CUUGUUUUUCUCCAAUAUCUCA	UUAGAAUUGGGAGAAUGACAAG	Cleavage		osa-miR156b-5p	LOC_Os08g39890.1	1	992	1011	UGACAGAAGAGAGUGAGCAC	GUGCUCUCUCUCUUCUGUCA	Cleavage	cDNA|OsSPL14 - SBP-box gene family member, expressed
osa-miR2864.2	XLOC_050893	5	2357	2377	UUGUUUUGCAUUGUAUAGGUA	UACCUAUAUCAUGUAAGAUCA	Cleavage		osa-miR156b-5p	LOC_Os01g69830.1	1	1153	1172	UGACAGAAGAGAGUGAGCAC	GUGCUCUCUCUCUUCUGUCA	Cleavage	cDNA|OsSPL2 - SBP-box gene family member, expressed
osa-miR2867-3p	XLOC_049857	5	247	266	CCAGGACGUGUGGGAUGGCA	UGCAAUCUUAUGUGUCCUAG	Cleavage		osa-miR156b-5p	LOC_Os06g49010.3	1	1439	1458	UGACAGAAGAGAGUGAGCAC	GUGCUCUCUCUCUUCUGUCA	Cleavage	cDNA|OsSPL12 - SBP-box gene family member, expressed
osa-miR2869	XLOC_043574	5	2310	2330	UCCCGACAUUAAAUUCUGGGC	UCACGGAAUUGAGUAUCGGGA	Translation		osa-miR156b-5p	LOC_Os06g49010.2	1	1494	1513	UGACAGAAGAGAGUGAGCAC	GUGCUCUCUCUCUUCUGUCA	Cleavage	cDNA|OsSPL12 - SBP-box gene family member, expressed
osa-miR2873b	XLOC_020194	5	1694	1714	UUGGACUUGAGAUUUGGUAUG	CAACCUAAUUCUCAAGUCUAG	Cleavage		osa-miR156b-5p	LOC_Os06g49010.4	1	1638	1657	UGACAGAAGAGAGUGAGCAC	GUGCUCUCUCUCUUCUGUCA	Cleavage	cDNA|OsSPL12 - SBP-box gene family member, expressed
osa-miR2874	XLOC_035558	5	222	245	AUGUGAACAGUGUCAAACAGUGUC	CUCUAUGGAUGGCAAUGUUUGCAU	Translation		osa-miR156b-5p	LOC_Os06g49010.1	1	1686	1705	UGACAGAAGAGAGUGAGCAC	GUGCUCUCUCUCUUCUGUCA	Cleavage	cDNA|OsSPL12 - SBP-box gene family member, expressed
osa-miR2876-5p	XLOC_036674	5	907	927	AAUUGCUGGCAGCACUGUUUA	CAUACAGAGAUACCAGCAAUU	Translation		osa-miR156b-5p	LOC_Os06g49010.6	1	1842	1861	UGACAGAAGAGAGUGAGCAC	GUGCUCUCUCUCUUCUGUCA	Cleavage	cDNA|OsSPL12 - SBP-box gene family member, expressed
osa-miR2878-3p	XLOC_020194	5	2624	2647	CAGGAUUUUAUACAUGUAAAGAAU	AUUUAGUAUUGGUAUAGAAUCCUU	Cleavage		osa-miR156b-5p	LOC_Os06g49010.5	1	2018	2037	UGACAGAAGAGAGUGAGCAC	GUGCUCUCUCUCUUCUGUCA	Cleavage	cDNA|OsSPL12 - SBP-box gene family member, expressed
osa-miR2920	XLOC_006563	5	191	213	AAACAACAAUAUAACAUUUCAAA	CAUUAUAUUUUCUGUUGUUGUUA	Cleavage		osa-miR156b-5p	LOC_Os02g07780.2	1	2221	2240	UGACAGAAGAGAGUGAGCAC	GUGCUCUCUCUCUUCUGUCA	Cleavage	cDNA|OsSPL4 - SBP-box gene family member, expressed
osa-miR2923	XLOC_048525	5	3171	3192	AGACAAAAAUAUAAAUAACAAA	UUAUUUUUUUAUAUUUUUAUUC	Cleavage		osa-miR156b-5p	LOC_Os07g32170.2	1	664	683	UGACAGAAGAGAGUGAGCAC	AUGCUCCCUCUCUUCUGUCA	Cleavage	cDNA|OsSPL13 - SBP-box gene family member, expressed
osa-miR2926	XLOC_045515	5	176	195	AGGUCGUCGACGUUGGUGCU	CGCAGCAACGGCGACGACGA	Translation		osa-miR156b-5p	LOC_Os07g32170.1	1	852	871	UGACAGAAGAGAGUGAGCAC	AUGCUCCCUCUCUUCUGUCA	Cleavage	cDNA|OsSPL13 - SBP-box gene family member, expressed
osa-miR2928	XLOC_029640	5	708	727	AAGAAGACGACAUUUUGUUG	CUACAAAAGGUCGUGUUCUA	Cleavage		osa-miR156b-5p	LOC_Os02g04680.2	1	1962	1981	UGACAGAAGAGAGUGAGCAC	AUGCUCUCUCUCUUCUGUCA	Cleavage	cDNA|OsSPL3 - SBP-box gene family member, expressed
osa-miR395b	XLOC_029640	5	871	891	GUGAAGUGUUUGGGGGAACUC	UAGUUCUCCAAAGUGCCUCAC	Cleavage		osa-miR156b-5p	LOC_Os02g04680.1	1	1965	1984	UGACAGAAGAGAGUGAGCAC	AUGCUCUCUCUCUUCUGUCA	Cleavage	cDNA|OsSPL3 - SBP-box gene family member, expressed
osa-miR395d	XLOC_029640	5	871	891	GUGAAGUGUUUGGGGGAACUC	UAGUUCUCCAAAGUGCCUCAC	Cleavage		osa-miR156c-5p	LOC_Os11g30370.1	1	1091	1110	UGACAGAAGAGAGUGAGCAC	GUGCUCUCUCUCUUCUGUCA	Cleavage	cDNA|OsSPL19 - SBP-box gene family member, expressed
osa-miR395e	XLOC_029640	5	871	891	GUGAAGUGUUUGGGGGAACUC	UAGUUCUCCAAAGUGCCUCAC	Cleavage		osa-miR156c-5p	LOC_Os09g32944.1	1	1034	1053	UGACAGAAGAGAGUGAGCAC	GUGCUCUCUCUCUUCUGUCA	Cleavage	cDNA|OsSPL18 - SBP-box gene family member, expressed
osa-miR395f	XLOC_006563	5	74	94	GUGAAUUGUUUGGGGGAACUC	ACCCUCCCUUGAACAAUUUAA	Cleavage		osa-miR156c-5p	LOC_Os09g31438.1	1	809	828	UGACAGAAGAGAGUGAGCAC	GUGCUCUCUCUCUUCUGUCA	Cleavage	cDNA|OsSPL17 - SBP-box gene family member, expressed
osa-miR395g	XLOC_029640	5	871	891	GUGAAGUGUUUGGGGGAACUC	UAGUUCUCCAAAGUGCCUCAC	Cleavage		osa-miR156c-5p	LOC_Os06g45310.1	1	854	873	UGACAGAAGAGAGUGAGCAC	GUGCUCUCUCUCUUCUGUCA	Cleavage	cDNA|OsSPL11 - SBP-box gene family member, expressed
osa-miR395h	XLOC_029640	5	871	891	GUGAAGUGUUUGGGGGAACUC	UAGUUCUCCAAAGUGCCUCAC	Cleavage		osa-miR156c-5p	LOC_Os04g46580.1	1	818	837	UGACAGAAGAGAGUGAGCAC	GUGCUCUCUCUCUUCUGUCA	Cleavage	cDNA|OsSPL7 - SBP-box gene family member, expressed
osa-miR395i	XLOC_029640	5	871	891	GUGAAGUGUUUGGGGGAACUC	UAGUUCUCCAAAGUGCCUCAC	Cleavage		osa-miR156c-5p	LOC_Os02g07780.1	1	987	1006	UGACAGAAGAGAGUGAGCAC	GUGCUCUCUCUCUUCUGUCA	Cleavage	cDNA|OsSPL4 - SBP-box gene family member, expressed
osa-miR395j	XLOC_029640	5	871	891	GUGAAGUGUUUGGGGGAACUC	UAGUUCUCCAAAGUGCCUCAC	Cleavage		osa-miR156c-5p	LOC_Os08g41940.1	1	1054	1073	UGACAGAAGAGAGUGAGCAC	GUGCUCUCUCUCUUCUGUCA	Cleavage	cDNA|OsSPL16 - SBP-box gene family member, expressed
osa-miR395k	XLOC_029640	5	871	891	GUGAAGUGUUUGGGGGAACUC	UAGUUCUCCAAAGUGCCUCAC	Cleavage		osa-miR156c-5p	LOC_Os08g39890.1	1	992	1011	UGACAGAAGAGAGUGAGCAC	GUGCUCUCUCUCUUCUGUCA	Cleavage	cDNA|OsSPL14 - SBP-box gene family member, expressed
osa-miR395l	XLOC_029640	5	871	891	GUGAAGUGUUUGGGGGAACUC	UAGUUCUCCAAAGUGCCUCAC	Cleavage		osa-miR156c-5p	LOC_Os01g69830.1	1	1153	1172	UGACAGAAGAGAGUGAGCAC	GUGCUCUCUCUCUUCUGUCA	Cleavage	cDNA|OsSPL2 - SBP-box gene family member, expressed
osa-miR395m	XLOC_029640	5	871	891	GUGAAGUGUUUGGGGGAACUC	UAGUUCUCCAAAGUGCCUCAC	Cleavage		osa-miR156c-5p	LOC_Os06g49010.3	1	1439	1458	UGACAGAAGAGAGUGAGCAC	GUGCUCUCUCUCUUCUGUCA	Cleavage	cDNA|OsSPL12 - SBP-box gene family member, expressed
osa-miR395n	XLOC_029640	5	871	891	GUGAAGUGUUUGGGGGAACUC	UAGUUCUCCAAAGUGCCUCAC	Cleavage		osa-miR156c-5p	LOC_Os06g49010.2	1	1494	1513	UGACAGAAGAGAGUGAGCAC	GUGCUCUCUCUCUUCUGUCA	Cleavage	cDNA|OsSPL12 - SBP-box gene family member, expressed
osa-miR395p	XLOC_029640	5	871	891	GUGAAGUGUUUGGGGGAACUC	UAGUUCUCCAAAGUGCCUCAC	Cleavage		osa-miR156c-5p	LOC_Os06g49010.4	1	1638	1657	UGACAGAAGAGAGUGAGCAC	GUGCUCUCUCUCUUCUGUCA	Cleavage	cDNA|OsSPL12 - SBP-box gene family member, expressed
osa-miR395q	XLOC_029640	5	871	891	GUGAAGUGUUUGGGGGAACUC	UAGUUCUCCAAAGUGCCUCAC	Cleavage		osa-miR156c-5p	LOC_Os06g49010.1	1	1686	1705	UGACAGAAGAGAGUGAGCAC	GUGCUCUCUCUCUUCUGUCA	Cleavage	cDNA|OsSPL12 - SBP-box gene family member, expressed
osa-miR395r	XLOC_029640	5	871	891	GUGAAGUGUUUGGGGGAACUC	UAGUUCUCCAAAGUGCCUCAC	Cleavage		osa-miR156c-5p	LOC_Os06g49010.6	1	1842	1861	UGACAGAAGAGAGUGAGCAC	GUGCUCUCUCUCUUCUGUCA	Cleavage	cDNA|OsSPL12 - SBP-box gene family member, expressed
osa-miR395s	XLOC_029640	5	871	891	GUGAAGUGUUUGGGGGAACUC	UAGUUCUCCAAAGUGCCUCAC	Cleavage		osa-miR156c-5p	LOC_Os06g49010.5	1	2018	2037	UGACAGAAGAGAGUGAGCAC	GUGCUCUCUCUCUUCUGUCA	Cleavage	cDNA|OsSPL12 - SBP-box gene family member, expressed
osa-miR395y	XLOC_029640	5	871	891	GUGAAGUGUUUGGGGGAACUC	UAGUUCUCCAAAGUGCCUCAC	Cleavage		osa-miR156c-5p	LOC_Os02g07780.2	1	2221	2240	UGACAGAAGAGAGUGAGCAC	GUGCUCUCUCUCUUCUGUCA	Cleavage	cDNA|OsSPL4 - SBP-box gene family member, expressed
osa-miR396a-5p	XLOC_030829	5	811	831	UUCCACAGCUUUCUUGAACUG	AAGGUCAAGGAAGUUGGUGAA	Cleavage		osa-miR156c-5p	LOC_Os07g32170.2	1	664	683	UGACAGAAGAGAGUGAGCAC	AUGCUCCCUCUCUUCUGUCA	Cleavage	cDNA|OsSPL13 - SBP-box gene family member, expressed
osa-miR396b-5p	XLOC_030829	5	811	831	UUCCACAGCUUUCUUGAACUG	AAGGUCAAGGAAGUUGGUGAA	Cleavage		osa-miR156c-5p	LOC_Os07g32170.1	1	852	871	UGACAGAAGAGAGUGAGCAC	AUGCUCCCUCUCUUCUGUCA	Cleavage	cDNA|OsSPL13 - SBP-box gene family member, expressed
osa-miR396c-5p	XLOC_030829	5	811	831	UUCCACAGCUUUCUUGAACUU	AAGGUCAAGGAAGUUGGUGAA	Cleavage		osa-miR156c-5p	LOC_Os02g04680.2	1	1962	1981	UGACAGAAGAGAGUGAGCAC	AUGCUCUCUCUCUUCUGUCA	Cleavage	cDNA|OsSPL3 - SBP-box gene family member, expressed
osa-miR3981-3p	XLOC_024405	5	206	226	AGUAUUAGGAUACGUCUCAUC	GUUUAGAUAUAUACUAGUACU	Cleavage		osa-miR156c-5p	LOC_Os02g04680.1	1	1965	1984	UGACAGAAGAGAGUGAGCAC	AUGCUCUCUCUCUUCUGUCA	Cleavage	cDNA|OsSPL3 - SBP-box gene family member, expressed
osa-miR417	XLOC_053362	5	3574	3594	GAAUGUAGUGAAUUUGUUCCA	UAAAAAAAAUUAGCUAUAUUU	Translation		osa-miR156d	LOC_Os11g30370.1	1	1091	1110	UGACAGAAGAGAGUGAGCAC	GUGCUCUCUCUCUUCUGUCA	Cleavage	cDNA|OsSPL19 - SBP-box gene family member, expressed
osa-miR418	XLOC_048354	5	3615	3635	UAAUGUGAUGAUGAAAUGACG	AGUGAUGUCGUCAUCACCUUU	Cleavage		osa-miR156d	LOC_Os09g32944.1	1	1034	1053	UGACAGAAGAGAGUGAGCAC	GUGCUCUCUCUCUUCUGUCA	Cleavage	cDNA|OsSPL18 - SBP-box gene family member, expressed
osa-miR437	XLOC_048525	5	2997	3017	AAAGUUAGAGAAGUUUGACUU	AAAGAGAAUUUUUUUAACUUU	Cleavage		osa-miR156d	LOC_Os09g31438.1	1	809	828	UGACAGAAGAGAGUGAGCAC	GUGCUCUCUCUCUUCUGUCA	Cleavage	cDNA|OsSPL17 - SBP-box gene family member, expressed
osa-miR444b.1	XLOC_001049	5	1216	1236	UGUUGUCUCAAGCUUGCUGCC	GAUAGCAAACUAGAGAUGACG	Translation		osa-miR156d	LOC_Os06g45310.1	1	854	873	UGACAGAAGAGAGUGAGCAC	GUGCUCUCUCUCUUCUGUCA	Cleavage	cDNA|OsSPL11 - SBP-box gene family member, expressed
osa-miR444c.1	XLOC_001049	5	1216	1236	UGUUGUCUCAAGCUUGCUGCC	GAUAGCAAACUAGAGAUGACG	Translation		osa-miR156d	LOC_Os04g46580.1	1	818	837	UGACAGAAGAGAGUGAGCAC	GUGCUCUCUCUCUUCUGUCA	Cleavage	cDNA|OsSPL7 - SBP-box gene family member, expressed
osa-miR5081	XLOC_040912	5	384	405	UAAUUUGUAGCAAAUUGAUAGU	UUCUUUCAUUUGUUAUUAAUUA	Cleavage		osa-miR156d	LOC_Os02g07780.1	1	987	1006	UGACAGAAGAGAGUGAGCAC	GUGCUCUCUCUCUUCUGUCA	Cleavage	cDNA|OsSPL4 - SBP-box gene family member, expressed
osa-miR5143a	XLOC_040359	5	202	225	UGUGGUAUGUUGGCAAUGUAGGAA	AUAUGACGUACUCAACAAGCCACA	Cleavage		osa-miR156d	LOC_Os08g41940.1	1	1054	1073	UGACAGAAGAGAGUGAGCAC	GUGCUCUCUCUCUUCUGUCA	Cleavage	cDNA|OsSPL16 - SBP-box gene family member, expressed
osa-miR5143b	XLOC_040359	5	202	225	UGUGGUAUGUUGGCAAUGUAGGAA	AUAUGACGUACUCAACAAGCCACA	Cleavage		osa-miR156d	LOC_Os08g39890.1	1	992	1011	UGACAGAAGAGAGUGAGCAC	GUGCUCUCUCUCUUCUGUCA	Cleavage	cDNA|OsSPL14 - SBP-box gene family member, expressed
osa-miR5146	XLOC_035632	5	95	118	UUUAACUAAUGAACCGGCACCUAU	UUUGUUGCUGAUCCAUUAGGUAGA	Cleavage		osa-miR156d	LOC_Os01g69830.1	1	1153	1172	UGACAGAAGAGAGUGAGCAC	GUGCUCUCUCUCUUCUGUCA	Cleavage	cDNA|OsSPL2 - SBP-box gene family member, expressed
osa-miR5148a	XLOC_053362	5	519	542	UGAGGGGUAGAAAUGUCAUAUCAU	AAUUCAUGUAAUUUCAAUCCCUCC	Cleavage		osa-miR156d	LOC_Os06g49010.3	1	1439	1458	UGACAGAAGAGAGUGAGCAC	GUGCUCUCUCUCUUCUGUCA	Cleavage	cDNA|OsSPL12 - SBP-box gene family member, expressed
osa-miR5148b	XLOC_053362	5	519	542	UGAGGGGUAGAAAUGUCAUAUCAU	AAUUCAUGUAAUUUCAAUCCCUCC	Cleavage		osa-miR156d	LOC_Os06g49010.2	1	1494	1513	UGACAGAAGAGAGUGAGCAC	GUGCUCUCUCUCUUCUGUCA	Cleavage	cDNA|OsSPL12 - SBP-box gene family member, expressed
osa-miR5148c	XLOC_053362	5	519	542	UGAGGGGUAGAAAUGUCAUAUCAU	AAUUCAUGUAAUUUCAAUCCCUCC	Cleavage		osa-miR156d	LOC_Os06g49010.4	1	1638	1657	UGACAGAAGAGAGUGAGCAC	GUGCUCUCUCUCUUCUGUCA	Cleavage	cDNA|OsSPL12 - SBP-box gene family member, expressed
osa-miR5150-5p	XLOC_001530	5	649	671	AGCUUCUGACAGCUGCAGUUUCUC	UAUGAAUU-UAGCUAUCAGAAGUU	Translation		osa-miR156d	LOC_Os06g49010.1	1	1686	1705	UGACAGAAGAGAGUGAGCAC	GUGCUCUCUCUCUUCUGUCA	Cleavage	cDNA|OsSPL12 - SBP-box gene family member, expressed
osa-miR5157a-5p	XLOC_043574	5	4154	4177	AACUUUUUAAUAGCUACAACUUCU	AUAAGUUGUAGAUAUUGAUGAGUA	Cleavage		osa-miR156d	LOC_Os06g49010.6	1	1842	1861	UGACAGAAGAGAGUGAGCAC	GUGCUCUCUCUCUUCUGUCA	Cleavage	cDNA|OsSPL12 - SBP-box gene family member, expressed
osa-miR5157b-5p	XLOC_043574	5	4154	4177	AACUUUUUAAUAGCUACAACUUCU	AUAAGUUGUAGAUAUUGAUGAGUA	Cleavage		osa-miR156d	LOC_Os06g49010.5	1	2018	2037	UGACAGAAGAGAGUGAGCAC	GUGCUCUCUCUCUUCUGUCA	Cleavage	cDNA|OsSPL12 - SBP-box gene family member, expressed
osa-miR5159	XLOC_035128	5	1118	1141	AACUAGAGUGGGUCAACGGGUACC	AAACCCCGUCGAUCAGCUCAAGUU	Translation		osa-miR156d	LOC_Os02g07780.2	1	2221	2240	UGACAGAAGAGAGUGAGCAC	GUGCUCUCUCUCUUCUGUCA	Cleavage	cDNA|OsSPL4 - SBP-box gene family member, expressed
osa-miR5162	XLOC_048354	5	4280	4303	AAAUGACCAAAAUACCCCUAGAAC	UUUCUAUUGAUGUUUUGGUCAUAU	Cleavage		osa-miR156d	LOC_Os07g32170.2	1	664	683	UGACAGAAGAGAGUGAGCAC	AUGCUCCCUCUCUUCUGUCA	Cleavage	cDNA|OsSPL13 - SBP-box gene family member, expressed
osa-miR528-3p	XLOC_020194	5	2868	2888	CCUGUGCUUGCCUCUUCCAUU	AAUUGAGGAGUCAAUCGCAGG	Translation		osa-miR156d	LOC_Os07g32170.1	1	852	871	UGACAGAAGAGAGUGAGCAC	AUGCUCCCUCUCUUCUGUCA	Cleavage	cDNA|OsSPL13 - SBP-box gene family member, expressed
osa-miR535-3p	XLOC_048354	5	376	396	GUGCUUUCUCCCGUUGUCACU	GAAGAUGACGGGAGGAAGAAG	Cleavage		osa-miR156d	LOC_Os02g04680.2	1	1962	1981	UGACAGAAGAGAGUGAGCAC	AUGCUCUCUCUCUUCUGUCA	Cleavage	cDNA|OsSPL3 - SBP-box gene family member, expressed
osa-miR5485	XLOC_039631	5	95	116	UGACAACUGGUAGCA-GAGCAA	UAGCUCGUACUACCAGUUCUCG	Cleavage		osa-miR156d	LOC_Os02g04680.1	1	1965	1984	UGACAGAAGAGAGUGAGCAC	AUGCUCUCUCUCUUCUGUCA	Cleavage	cDNA|OsSPL3 - SBP-box gene family member, expressed
osa-miR5495	XLOC_000467	5	1409	1428	AGAGGUCCGGAUCGAACGUAG	GAGCGAUCGAUCUGG-CCUCU	Cleavage		osa-miR156e	LOC_Os11g30370.1	1	1091	1110	UGACAGAAGAGAGUGAGCAC	GUGCUCUCUCUCUUCUGUCA	Cleavage	cDNA|OsSPL19 - SBP-box gene family member, expressed
osa-miR5501	XLOC_001530	5	418	438	UCUUGUGGCUAGAAGGGUGAG	GAUACCCUUUCAGCCACAAUC	Translation		osa-miR156e	LOC_Os09g32944.1	1	1034	1053	UGACAGAAGAGAGUGAGCAC	GUGCUCUCUCUCUUCUGUCA	Cleavage	cDNA|OsSPL18 - SBP-box gene family member, expressed
osa-miR5516a	XLOC_030829	5	35	55	CUCAUUGCUUCGGUAGGCUGG	GCGAUCUGCCGAAGCUGUGGG	Cleavage		osa-miR156e	LOC_Os09g31438.1	1	809	828	UGACAGAAGAGAGUGAGCAC	GUGCUCUCUCUCUUCUGUCA	Cleavage	cDNA|OsSPL17 - SBP-box gene family member, expressed
osa-miR5516b	XLOC_030829	5	35	55	CUCAUUGCUUCGGUAGGCUGG	GCGAUCUGCCGAAGCUGUGGG	Cleavage		osa-miR156e	LOC_Os06g45310.1	1	854	873	UGACAGAAGAGAGUGAGCAC	GUGCUCUCUCUCUUCUGUCA	Cleavage	cDNA|OsSPL11 - SBP-box gene family member, expressed
osa-miR5517	XLOC_029640	5	1915	1935	UGCAUCACGGCGCAUAUGUAG	AUGGAUGUGAGCUGUGGUGUA	Cleavage		osa-miR156e	LOC_Os04g46580.1	1	818	837	UGACAGAAGAGAGUGAGCAC	GUGCUCUCUCUCUUCUGUCA	Cleavage	cDNA|OsSPL7 - SBP-box gene family member, expressed
osa-miR5529	XLOC_001530	5	1449	1469	GUUUCAUCCAUGGACACCGCA	AUUUAUGUCAAUGGAUGAAGC	Cleavage		osa-miR156e	LOC_Os02g07780.1	1	987	1006	UGACAGAAGAGAGUGAGCAC	GUGCUCUCUCUCUUCUGUCA	Cleavage	cDNA|OsSPL4 - SBP-box gene family member, expressed
osa-miR5532	XLOC_035580	5	643	664	AUGGAAUAUAUGACAAAGGUGG	GCAUUAUUAUCCUAUAUUCUAU	Translation		osa-miR156e	LOC_Os08g41940.1	1	1054	1073	UGACAGAAGAGAGUGAGCAC	GUGCUCUCUCUCUUCUGUCA	Cleavage	cDNA|OsSPL16 - SBP-box gene family member, expressed
osa-miR5534a	XLOC_043574	5	3272	3292	UGACGACAACAGCUAGAAUGG	UAGUUCUAGUUCUUUUUGUCG	Translation		osa-miR156e	LOC_Os08g39890.1	1	992	1011	UGACAGAAGAGAGUGAGCAC	GUGCUCUCUCUCUUCUGUCA	Cleavage	cDNA|OsSPL14 - SBP-box gene family member, expressed
osa-miR5540	XLOC_000467	5	446	466	UUGUGCGAGAUCGACGGUAUA	CGGGCUGCCGAUCUCGUGCAU	Cleavage		osa-miR156e	LOC_Os01g69830.1	1	1153	1172	UGACAGAAGAGAGUGAGCAC	GUGCUCUCUCUCUUCUGUCA	Cleavage	cDNA|OsSPL2 - SBP-box gene family member, expressed
osa-miR5541	XLOC_043574	5	1666	1686	UCAAGUGGUGUACUCUAAAGA	GAUUUUGAAUGCAUAACUUGA	Cleavage		osa-miR156e	LOC_Os06g49010.3	1	1439	1458	UGACAGAAGAGAGUGAGCAC	GUGCUCUCUCUCUUCUGUCA	Cleavage	cDNA|OsSPL12 - SBP-box gene family member, expressed
osa-miR5542	XLOC_036674	5	827	847	UUUGAGAAGGUAUCAUGAGAU	UCCUCAUGAUUCUUAUUCAAU	Translation		osa-miR156e	LOC_Os06g49010.2	1	1494	1513	UGACAGAAGAGAGUGAGCAC	GUGCUCUCUCUCUUCUGUCA	Cleavage	cDNA|OsSPL12 - SBP-box gene family member, expressed
osa-miR5790	XLOC_048525	5	2553	2576	AAGACGAUCCUAGCAGAGCUUCAU	GAUGAGUUUUUCUAGGCUUGUCUA	Cleavage		osa-miR156e	LOC_Os06g49010.4	1	1638	1657	UGACAGAAGAGAGUGAGCAC	GUGCUCUCUCUCUUCUGUCA	Cleavage	cDNA|OsSPL12 - SBP-box gene family member, expressed
osa-miR5796	XLOC_014608	5	93	113	UCAUUCAGGAUUGAAGCCGCC	CGCGCCUUCAGAUUUGGGUGA	Translation		osa-miR156e	LOC_Os06g49010.1	1	1686	1705	UGACAGAAGAGAGUGAGCAC	GUGCUCUCUCUCUUCUGUCA	Cleavage	cDNA|OsSPL12 - SBP-box gene family member, expressed
osa-miR5802	XLOC_020026	5	1	20	AUGGACUGUACUUUGUAAAG	CGCUACAGAGUACAGACCAG	Cleavage		osa-miR156e	LOC_Os06g49010.6	1	1842	1861	UGACAGAAGAGAGUGAGCAC	GUGCUCUCUCUCUUCUGUCA	Cleavage	cDNA|OsSPL12 - SBP-box gene family member, expressed
osa-miR5806	XLOC_043574	5	94	114	ACAGGCAAAGACAAUGACGGC	CGCGCCAUUGGCUUUGCCUCG	Translation		osa-miR156e	LOC_Os06g49010.5	1	2018	2037	UGACAGAAGAGAGUGAGCAC	GUGCUCUCUCUCUUCUGUCA	Cleavage	cDNA|OsSPL12 - SBP-box gene family member, expressed
osa-miR5807	XLOC_048525	5	1030	1053	AGGAGGUCUGGAGAGUUAUGUGGC	GCCUCACUACUCUCUCGACCUCCA	Cleavage		osa-miR156e	LOC_Os02g07780.2	1	2221	2240	UGACAGAAGAGAGUGAGCAC	GUGCUCUCUCUCUUCUGUCA	Cleavage	cDNA|OsSPL4 - SBP-box gene family member, expressed
osa-miR5816	XLOC_035558	5	398	421	UAGGAGUGUUUGUAGGAGCGCCAC	CCUUUGUUCUAACAACCACUACUA	Cleavage		osa-miR156e	LOC_Os07g32170.2	1	664	683	UGACAGAAGAGAGUGAGCAC	AUGCUCCCUCUCUUCUGUCA	Cleavage	cDNA|OsSPL13 - SBP-box gene family member, expressed
osa-miR5819	XLOC_001451	5	52	72	AGGACGAGGGGAACGGCGGCG	CGACGCCGUAUUCCUCUUCCU	Cleavage		osa-miR156e	LOC_Os07g32170.1	1	852	871	UGACAGAAGAGAGUGAGCAC	AUGCUCCCUCUCUUCUGUCA	Cleavage	cDNA|OsSPL13 - SBP-box gene family member, expressed
osa-miR5821	XLOC_001530	5	428	448	UGGACGGAGCGAUGGUGGGCG	CAGCCACAAUCGUUUUGUGCA	Cleavage		osa-miR156e	LOC_Os02g04680.2	1	1962	1981	UGACAGAAGAGAGUGAGCAC	AUGCUCUCUCUCUUCUGUCA	Cleavage	cDNA|OsSPL3 - SBP-box gene family member, expressed
osa-miR5827	XLOC_035128	5	1149	1169	UUUGUUGCAAUUUGGACUACC	UGUAGCUCAAGUUGCAAAAGC	Cleavage		osa-miR156e	LOC_Os02g04680.1	1	1965	1984	UGACAGAAGAGAGUGAGCAC	AUGCUCUCUCUCUUCUGUCA	Cleavage	cDNA|OsSPL3 - SBP-box gene family member, expressed
osa-miR5830	XLOC_001530	5	1127	1150	AUGUAGAUGAGGUGAUGUUACACA	UCAACUACAUUAUCUCCUCUGCAA	Cleavage		osa-miR156f-5p	LOC_Os11g30370.1	1	1091	1110	UGACAGAAGAGAGUGAGCAC	GUGCUCUCUCUCUUCUGUCA	Cleavage	cDNA|OsSPL19 - SBP-box gene family member, expressed
osa-miR5834	XLOC_039631	5	1474	1493	ACGGAUGUAGAAAUUGGUGAU	AGCGCUAAUUUUU-CGUCCGU	Cleavage		osa-miR156f-5p	LOC_Os09g32944.1	1	1034	1053	UGACAGAAGAGAGUGAGCAC	GUGCUCUCUCUCUUCUGUCA	Cleavage	cDNA|OsSPL18 - SBP-box gene family member, expressed
osa-miR5836	XLOC_030829	5	1507	1527	UGAGCAGCCGGACCAUGGGAU	UUCCAAGGGUUGGGCUGUUCG	Translation		osa-miR156f-5p	LOC_Os09g31438.1	1	809	828	UGACAGAAGAGAGUGAGCAC	GUGCUCUCUCUCUUCUGUCA	Cleavage	cDNA|OsSPL17 - SBP-box gene family member, expressed
osa-miR5837.1	XLOC_029640	5	334	354	AUGUUGGAAUGACAUGCAGCU	UUGUGCAUUUUAUUCUAAAAU	Cleavage		osa-miR156f-5p	LOC_Os06g45310.1	1	854	873	UGACAGAAGAGAGUGAGCAC	GUGCUCUCUCUCUUCUGUCA	Cleavage	cDNA|OsSPL11 - SBP-box gene family member, expressed
osa-miR6245	XLOC_040361	5	585	605	AGUAUAGGUGUCGGCUCUAUU	UAUAAAGGAGAUAUUUAUACU	Cleavage		osa-miR156f-5p	LOC_Os04g46580.1	1	818	837	UGACAGAAGAGAGUGAGCAC	GUGCUCUCUCUCUUCUGUCA	Cleavage	cDNA|OsSPL7 - SBP-box gene family member, expressed
osa-miR6248	XLOC_002582	5	424	444	UAUUUGAGGAUGGAGGUAGUA	CGGUGCUUUCGUGCUCAGAUA	Cleavage		osa-miR156f-5p	LOC_Os02g07780.1	1	987	1006	UGACAGAAGAGAGUGAGCAC	GUGCUCUCUCUCUUCUGUCA	Cleavage	cDNA|OsSPL4 - SBP-box gene family member, expressed
osa-miR6249a	XLOC_034673	5	1	20	CGUGAAGAGCUCGCCGGCGG	CCGCCGACGAGCUCCACGUG	Cleavage		osa-miR156f-5p	LOC_Os08g41940.1	1	1054	1073	UGACAGAAGAGAGUGAGCAC	GUGCUCUCUCUCUUCUGUCA	Cleavage	cDNA|OsSPL16 - SBP-box gene family member, expressed
osa-miR6249b	XLOC_034673	5	1	20	CGUGAAGAGCUCGCCGGCGG	CCGCCGACGAGCUCCACGUG	Cleavage		osa-miR156f-5p	LOC_Os08g39890.1	1	992	1011	UGACAGAAGAGAGUGAGCAC	GUGCUCUCUCUCUUCUGUCA	Cleavage	cDNA|OsSPL14 - SBP-box gene family member, expressed
osa-miR6251	XLOC_002582	5	753	773	UGUGUAGCCACAUUGUAAGGG	CUUGUGUGAUGUGGUUGUGCA	Cleavage		osa-miR156f-5p	LOC_Os01g69830.1	1	1153	1172	UGACAGAAGAGAGUGAGCAC	GUGCUCUCUCUCUUCUGUCA	Cleavage	cDNA|OsSPL2 - SBP-box gene family member, expressed
osa-miR6254	XLOC_053362	5	3148	3168	UGCUCCGGAUAUUAUGGCAUG	ACCGCAAUAUUAUCCGGUGCA	Cleavage		osa-miR156f-5p	LOC_Os06g49010.3	1	1439	1458	UGACAGAAGAGAGUGAGCAC	GUGCUCUCUCUCUUCUGUCA	Cleavage	cDNA|OsSPL12 - SBP-box gene family member, expressed
osa-miR6255	XLOC_047008	5	237	258	UGGGAAAAAUGGGCAGUUGAGU	AGCCAGCCACCUGUUUUCCCCA	Cleavage		osa-miR156f-5p	LOC_Os06g49010.2	1	1494	1513	UGACAGAAGAGAGUGAGCAC	GUGCUCUCUCUCUUCUGUCA	Cleavage	cDNA|OsSPL12 - SBP-box gene family member, expressed
osa-miR7694-3p	XLOC_048354	5	4579	4600	CCAUAUUCGUAGUGCUAGGUGG	GCAGCUCGCACGAUGAAUAUGC	Translation		osa-miR156f-5p	LOC_Os06g49010.4	1	1638	1657	UGACAGAAGAGAGUGAGCAC	GUGCUCUCUCUCUUCUGUCA	Cleavage	cDNA|OsSPL12 - SBP-box gene family member, expressed
osa-miR7694-5p	XLOC_001451	5	2629	2652	AACCUAGUACUGGAUUAGUCACCA	UUGGGACUCAUAUAGUAUUUGGUU	Cleavage		osa-miR156f-5p	LOC_Os06g49010.1	1	1686	1705	UGACAGAAGAGAGUGAGCAC	GUGCUCUCUCUCUUCUGUCA	Cleavage	cDNA|OsSPL12 - SBP-box gene family member, expressed
osa-miR7695-3p	XLOC_035128	5	565	584	ACGUGAUGUGCCACGUAGGCA	UGCCUACAUG-UGCAUCACGU	Translation		osa-miR156f-5p	LOC_Os06g49010.6	1	1842	1861	UGACAGAAGAGAGUGAGCAC	GUGCUCUCUCUCUUCUGUCA	Cleavage	cDNA|OsSPL12 - SBP-box gene family member, expressed
osa-miR812g	XLOC_053362	5	3374	3396	AAGACGGAUGAUUAAAGUUGGACA	UUAUUAUCUUUAAU-AUCCGUCUA	Translation		osa-miR156f-5p	LOC_Os06g49010.5	1	2018	2037	UGACAGAAGAGAGUGAGCAC	GUGCUCUCUCUCUUCUGUCA	Cleavage	cDNA|OsSPL12 - SBP-box gene family member, expressed
osa-miR812h	XLOC_053362	5	3374	3396	AAGACGGAUGAUUAAAGUUGGACA	UUAUUAUCUUUAAU-AUCCGUCUA	Translation		osa-miR156f-5p	LOC_Os02g07780.2	1	2221	2240	UGACAGAAGAGAGUGAGCAC	GUGCUCUCUCUCUUCUGUCA	Cleavage	cDNA|OsSPL4 - SBP-box gene family member, expressed
osa-miR812i	XLOC_053362	5	3374	3396	AAGACGGAUGAUUAAAGUUGGACA	UUAUUAUCUUUAAU-AUCCGUCUA	Translation		osa-miR156f-5p	LOC_Os07g32170.2	1	664	683	UGACAGAAGAGAGUGAGCAC	AUGCUCCCUCUCUUCUGUCA	Cleavage	cDNA|OsSPL13 - SBP-box gene family member, expressed
osa-miR812j	XLOC_053362	5	3374	3396	AAGACGGAUGAUUAAAGUUGGACA	UUAUUAUCUUUAAU-AUCCGUCUA	Translation		osa-miR156f-5p	LOC_Os07g32170.1	1	852	871	UGACAGAAGAGAGUGAGCAC	AUGCUCCCUCUCUUCUGUCA	Cleavage	cDNA|OsSPL13 - SBP-box gene family member, expressed
osa-miR812r	XLOC_043574	5	3525	3548	ACGUUAGACACGAAUUUCUACGGC	GUCACAGAAAUUUGUCUAUGACGA	Cleavage		osa-miR156f-5p	LOC_Os02g04680.2	1	1962	1981	UGACAGAAGAGAGUGAGCAC	AUGCUCUCUCUCUUCUGUCA	Cleavage	cDNA|OsSPL3 - SBP-box gene family member, expressed
osa-miR816	XLOC_043772	5	1882	1901	GUGACAUAUUUUACUACAAC	UUUUUAAUCAAAUAUGUUAG	Cleavage		osa-miR156f-5p	LOC_Os02g04680.1	1	1965	1984	UGACAGAAGAGAGUGAGCAC	AUGCUCUCUCUCUUCUGUCA	Cleavage	cDNA|OsSPL3 - SBP-box gene family member, expressed
									osa-miR156g-5p	LOC_Os11g30370.1	1	1091	1110	UGACAGAAGAGAGUGAGCAC	GUGCUCUCUCUCUUCUGUCA	Cleavage	cDNA|OsSPL19 - SBP-box gene family member, expressed
									osa-miR156g-5p	LOC_Os09g32944.1	1	1034	1053	UGACAGAAGAGAGUGAGCAC	GUGCUCUCUCUCUUCUGUCA	Cleavage	cDNA|OsSPL18 - SBP-box gene family member, expressed
									osa-miR156g-5p	LOC_Os09g31438.1	1	809	828	UGACAGAAGAGAGUGAGCAC	GUGCUCUCUCUCUUCUGUCA	Cleavage	cDNA|OsSPL17 - SBP-box gene family member, expressed
									osa-miR156g-5p	LOC_Os06g45310.1	1	854	873	UGACAGAAGAGAGUGAGCAC	GUGCUCUCUCUCUUCUGUCA	Cleavage	cDNA|OsSPL11 - SBP-box gene family member, expressed
									osa-miR156g-5p	LOC_Os04g46580.1	1	818	837	UGACAGAAGAGAGUGAGCAC	GUGCUCUCUCUCUUCUGUCA	Cleavage	cDNA|OsSPL7 - SBP-box gene family member, expressed
									osa-miR156g-5p	LOC_Os02g07780.1	1	987	1006	UGACAGAAGAGAGUGAGCAC	GUGCUCUCUCUCUUCUGUCA	Cleavage	cDNA|OsSPL4 - SBP-box gene family member, expressed
									osa-miR156g-5p	LOC_Os08g41940.1	1	1054	1073	UGACAGAAGAGAGUGAGCAC	GUGCUCUCUCUCUUCUGUCA	Cleavage	cDNA|OsSPL16 - SBP-box gene family member, expressed
									osa-miR156g-5p	LOC_Os08g39890.1	1	992	1011	UGACAGAAGAGAGUGAGCAC	GUGCUCUCUCUCUUCUGUCA	Cleavage	cDNA|OsSPL14 - SBP-box gene family member, expressed
									osa-miR156g-5p	LOC_Os01g69830.1	1	1153	1172	UGACAGAAGAGAGUGAGCAC	GUGCUCUCUCUCUUCUGUCA	Cleavage	cDNA|OsSPL2 - SBP-box gene family member, expressed
									osa-miR156g-5p	LOC_Os06g49010.3	1	1439	1458	UGACAGAAGAGAGUGAGCAC	GUGCUCUCUCUCUUCUGUCA	Cleavage	cDNA|OsSPL12 - SBP-box gene family member, expressed
									osa-miR156g-5p	LOC_Os06g49010.2	1	1494	1513	UGACAGAAGAGAGUGAGCAC	GUGCUCUCUCUCUUCUGUCA	Cleavage	cDNA|OsSPL12 - SBP-box gene family member, expressed
									osa-miR156g-5p	LOC_Os06g49010.4	1	1638	1657	UGACAGAAGAGAGUGAGCAC	GUGCUCUCUCUCUUCUGUCA	Cleavage	cDNA|OsSPL12 - SBP-box gene family member, expressed
									osa-miR156g-5p	LOC_Os06g49010.1	1	1686	1705	UGACAGAAGAGAGUGAGCAC	GUGCUCUCUCUCUUCUGUCA	Cleavage	cDNA|OsSPL12 - SBP-box gene family member, expressed
									osa-miR156g-5p	LOC_Os06g49010.6	1	1842	1861	UGACAGAAGAGAGUGAGCAC	GUGCUCUCUCUCUUCUGUCA	Cleavage	cDNA|OsSPL12 - SBP-box gene family member, expressed
									osa-miR156g-5p	LOC_Os06g49010.5	1	2018	2037	UGACAGAAGAGAGUGAGCAC	GUGCUCUCUCUCUUCUGUCA	Cleavage	cDNA|OsSPL12 - SBP-box gene family member, expressed
									osa-miR156g-5p	LOC_Os02g07780.2	1	2221	2240	UGACAGAAGAGAGUGAGCAC	GUGCUCUCUCUCUUCUGUCA	Cleavage	cDNA|OsSPL4 - SBP-box gene family member, expressed
									osa-miR156g-5p	LOC_Os07g32170.2	1	664	683	UGACAGAAGAGAGUGAGCAC	AUGCUCCCUCUCUUCUGUCA	Cleavage	cDNA|OsSPL13 - SBP-box gene family member, expressed
									osa-miR156g-5p	LOC_Os07g32170.1	1	852	871	UGACAGAAGAGAGUGAGCAC	AUGCUCCCUCUCUUCUGUCA	Cleavage	cDNA|OsSPL13 - SBP-box gene family member, expressed
									osa-miR156g-5p	LOC_Os02g04680.2	1	1962	1981	UGACAGAAGAGAGUGAGCAC	AUGCUCUCUCUCUUCUGUCA	Cleavage	cDNA|OsSPL3 - SBP-box gene family member, expressed
									osa-miR156g-5p	LOC_Os02g04680.1	1	1965	1984	UGACAGAAGAGAGUGAGCAC	AUGCUCUCUCUCUUCUGUCA	Cleavage	cDNA|OsSPL3 - SBP-box gene family member, expressed
									osa-miR156h-5p	LOC_Os11g30370.1	1	1091	1110	UGACAGAAGAGAGUGAGCAC	GUGCUCUCUCUCUUCUGUCA	Cleavage	cDNA|OsSPL19 - SBP-box gene family member, expressed
									osa-miR156h-5p	LOC_Os09g32944.1	1	1034	1053	UGACAGAAGAGAGUGAGCAC	GUGCUCUCUCUCUUCUGUCA	Cleavage	cDNA|OsSPL18 - SBP-box gene family member, expressed
									osa-miR156h-5p	LOC_Os09g31438.1	1	809	828	UGACAGAAGAGAGUGAGCAC	GUGCUCUCUCUCUUCUGUCA	Cleavage	cDNA|OsSPL17 - SBP-box gene family member, expressed
									osa-miR156h-5p	LOC_Os06g45310.1	1	854	873	UGACAGAAGAGAGUGAGCAC	GUGCUCUCUCUCUUCUGUCA	Cleavage	cDNA|OsSPL11 - SBP-box gene family member, expressed
									osa-miR156h-5p	LOC_Os04g46580.1	1	818	837	UGACAGAAGAGAGUGAGCAC	GUGCUCUCUCUCUUCUGUCA	Cleavage	cDNA|OsSPL7 - SBP-box gene family member, expressed
									osa-miR156h-5p	LOC_Os02g07780.1	1	987	1006	UGACAGAAGAGAGUGAGCAC	GUGCUCUCUCUCUUCUGUCA	Cleavage	cDNA|OsSPL4 - SBP-box gene family member, expressed
									osa-miR156h-5p	LOC_Os08g41940.1	1	1054	1073	UGACAGAAGAGAGUGAGCAC	GUGCUCUCUCUCUUCUGUCA	Cleavage	cDNA|OsSPL16 - SBP-box gene family member, expressed
									osa-miR156h-5p	LOC_Os08g39890.1	1	992	1011	UGACAGAAGAGAGUGAGCAC	GUGCUCUCUCUCUUCUGUCA	Cleavage	cDNA|OsSPL14 - SBP-box gene family member, expressed
									osa-miR156h-5p	LOC_Os01g69830.1	1	1153	1172	UGACAGAAGAGAGUGAGCAC	GUGCUCUCUCUCUUCUGUCA	Cleavage	cDNA|OsSPL2 - SBP-box gene family member, expressed
									osa-miR156h-5p	LOC_Os06g49010.3	1	1439	1458	UGACAGAAGAGAGUGAGCAC	GUGCUCUCUCUCUUCUGUCA	Cleavage	cDNA|OsSPL12 - SBP-box gene family member, expressed
									osa-miR156h-5p	LOC_Os06g49010.2	1	1494	1513	UGACAGAAGAGAGUGAGCAC	GUGCUCUCUCUCUUCUGUCA	Cleavage	cDNA|OsSPL12 - SBP-box gene family member, expressed
									osa-miR156h-5p	LOC_Os06g49010.4	1	1638	1657	UGACAGAAGAGAGUGAGCAC	GUGCUCUCUCUCUUCUGUCA	Cleavage	cDNA|OsSPL12 - SBP-box gene family member, expressed
									osa-miR156h-5p	LOC_Os06g49010.1	1	1686	1705	UGACAGAAGAGAGUGAGCAC	GUGCUCUCUCUCUUCUGUCA	Cleavage	cDNA|OsSPL12 - SBP-box gene family member, expressed
									osa-miR156h-5p	LOC_Os06g49010.6	1	1842	1861	UGACAGAAGAGAGUGAGCAC	GUGCUCUCUCUCUUCUGUCA	Cleavage	cDNA|OsSPL12 - SBP-box gene family member, expressed
									osa-miR156h-5p	LOC_Os06g49010.5	1	2018	2037	UGACAGAAGAGAGUGAGCAC	GUGCUCUCUCUCUUCUGUCA	Cleavage	cDNA|OsSPL12 - SBP-box gene family member, expressed
									osa-miR156h-5p	LOC_Os02g07780.2	1	2221	2240	UGACAGAAGAGAGUGAGCAC	GUGCUCUCUCUCUUCUGUCA	Cleavage	cDNA|OsSPL4 - SBP-box gene family member, expressed
									osa-miR156h-5p	LOC_Os07g32170.2	1	664	683	UGACAGAAGAGAGUGAGCAC	AUGCUCCCUCUCUUCUGUCA	Cleavage	cDNA|OsSPL13 - SBP-box gene family member, expressed
									osa-miR156h-5p	LOC_Os07g32170.1	1	852	871	UGACAGAAGAGAGUGAGCAC	AUGCUCCCUCUCUUCUGUCA	Cleavage	cDNA|OsSPL13 - SBP-box gene family member, expressed
									osa-miR156h-5p	LOC_Os02g04680.2	1	1962	1981	UGACAGAAGAGAGUGAGCAC	AUGCUCUCUCUCUUCUGUCA	Cleavage	cDNA|OsSPL3 - SBP-box gene family member, expressed
									osa-miR156h-5p	LOC_Os02g04680.1	1	1965	1984	UGACAGAAGAGAGUGAGCAC	AUGCUCUCUCUCUUCUGUCA	Cleavage	cDNA|OsSPL3 - SBP-box gene family member, expressed
									osa-miR156i	LOC_Os11g30370.1	1	1091	1110	UGACAGAAGAGAGUGAGCAC	GUGCUCUCUCUCUUCUGUCA	Cleavage	cDNA|OsSPL19 - SBP-box gene family member, expressed
									osa-miR156i	LOC_Os09g32944.1	1	1034	1053	UGACAGAAGAGAGUGAGCAC	GUGCUCUCUCUCUUCUGUCA	Cleavage	cDNA|OsSPL18 - SBP-box gene family member, expressed
									osa-miR156i	LOC_Os09g31438.1	1	809	828	UGACAGAAGAGAGUGAGCAC	GUGCUCUCUCUCUUCUGUCA	Cleavage	cDNA|OsSPL17 - SBP-box gene family member, expressed
									osa-miR156i	LOC_Os06g45310.1	1	854	873	UGACAGAAGAGAGUGAGCAC	GUGCUCUCUCUCUUCUGUCA	Cleavage	cDNA|OsSPL11 - SBP-box gene family member, expressed
									osa-miR156i	LOC_Os04g46580.1	1	818	837	UGACAGAAGAGAGUGAGCAC	GUGCUCUCUCUCUUCUGUCA	Cleavage	cDNA|OsSPL7 - SBP-box gene family member, expressed
									osa-miR156i	LOC_Os02g07780.1	1	987	1006	UGACAGAAGAGAGUGAGCAC	GUGCUCUCUCUCUUCUGUCA	Cleavage	cDNA|OsSPL4 - SBP-box gene family member, expressed
									osa-miR156i	LOC_Os08g41940.1	1	1054	1073	UGACAGAAGAGAGUGAGCAC	GUGCUCUCUCUCUUCUGUCA	Cleavage	cDNA|OsSPL16 - SBP-box gene family member, expressed
									osa-miR156i	LOC_Os08g39890.1	1	992	1011	UGACAGAAGAGAGUGAGCAC	GUGCUCUCUCUCUUCUGUCA	Cleavage	cDNA|OsSPL14 - SBP-box gene family member, expressed
									osa-miR156i	LOC_Os01g69830.1	1	1153	1172	UGACAGAAGAGAGUGAGCAC	GUGCUCUCUCUCUUCUGUCA	Cleavage	cDNA|OsSPL2 - SBP-box gene family member, expressed
									osa-miR156i	LOC_Os06g49010.3	1	1439	1458	UGACAGAAGAGAGUGAGCAC	GUGCUCUCUCUCUUCUGUCA	Cleavage	cDNA|OsSPL12 - SBP-box gene family member, expressed
									osa-miR156i	LOC_Os06g49010.2	1	1494	1513	UGACAGAAGAGAGUGAGCAC	GUGCUCUCUCUCUUCUGUCA	Cleavage	cDNA|OsSPL12 - SBP-box gene family member, expressed
									osa-miR156i	LOC_Os06g49010.4	1	1638	1657	UGACAGAAGAGAGUGAGCAC	GUGCUCUCUCUCUUCUGUCA	Cleavage	cDNA|OsSPL12 - SBP-box gene family member, expressed
									osa-miR156i	LOC_Os06g49010.1	1	1686	1705	UGACAGAAGAGAGUGAGCAC	GUGCUCUCUCUCUUCUGUCA	Cleavage	cDNA|OsSPL12 - SBP-box gene family member, expressed
									osa-miR156i	LOC_Os06g49010.6	1	1842	1861	UGACAGAAGAGAGUGAGCAC	GUGCUCUCUCUCUUCUGUCA	Cleavage	cDNA|OsSPL12 - SBP-box gene family member, expressed
									osa-miR156i	LOC_Os06g49010.5	1	2018	2037	UGACAGAAGAGAGUGAGCAC	GUGCUCUCUCUCUUCUGUCA	Cleavage	cDNA|OsSPL12 - SBP-box gene family member, expressed
									osa-miR156i	LOC_Os02g07780.2	1	2221	2240	UGACAGAAGAGAGUGAGCAC	GUGCUCUCUCUCUUCUGUCA	Cleavage	cDNA|OsSPL4 - SBP-box gene family member, expressed
									osa-miR156i	LOC_Os07g32170.2	1	664	683	UGACAGAAGAGAGUGAGCAC	AUGCUCCCUCUCUUCUGUCA	Cleavage	cDNA|OsSPL13 - SBP-box gene family member, expressed
									osa-miR156i	LOC_Os07g32170.1	1	852	871	UGACAGAAGAGAGUGAGCAC	AUGCUCCCUCUCUUCUGUCA	Cleavage	cDNA|OsSPL13 - SBP-box gene family member, expressed
									osa-miR156i	LOC_Os02g04680.2	1	1962	1981	UGACAGAAGAGAGUGAGCAC	AUGCUCUCUCUCUUCUGUCA	Cleavage	cDNA|OsSPL3 - SBP-box gene family member, expressed
									osa-miR156i	LOC_Os02g04680.1	1	1965	1984	UGACAGAAGAGAGUGAGCAC	AUGCUCUCUCUCUUCUGUCA	Cleavage	cDNA|OsSPL3 - SBP-box gene family member, expressed
									osa-miR156j-5p	LOC_Os11g30370.1	1	1091	1110	UGACAGAAGAGAGUGAGCAC	GUGCUCUCUCUCUUCUGUCA	Cleavage	cDNA|OsSPL19 - SBP-box gene family member, expressed
									osa-miR156j-5p	LOC_Os09g32944.1	1	1034	1053	UGACAGAAGAGAGUGAGCAC	GUGCUCUCUCUCUUCUGUCA	Cleavage	cDNA|OsSPL18 - SBP-box gene family member, expressed
									osa-miR156j-5p	LOC_Os09g31438.1	1	809	828	UGACAGAAGAGAGUGAGCAC	GUGCUCUCUCUCUUCUGUCA	Cleavage	cDNA|OsSPL17 - SBP-box gene family member, expressed
									osa-miR156j-5p	LOC_Os06g45310.1	1	854	873	UGACAGAAGAGAGUGAGCAC	GUGCUCUCUCUCUUCUGUCA	Cleavage	cDNA|OsSPL11 - SBP-box gene family member, expressed
									osa-miR156j-5p	LOC_Os04g46580.1	1	818	837	UGACAGAAGAGAGUGAGCAC	GUGCUCUCUCUCUUCUGUCA	Cleavage	cDNA|OsSPL7 - SBP-box gene family member, expressed
									osa-miR156j-5p	LOC_Os02g07780.1	1	987	1006	UGACAGAAGAGAGUGAGCAC	GUGCUCUCUCUCUUCUGUCA	Cleavage	cDNA|OsSPL4 - SBP-box gene family member, expressed
									osa-miR156j-5p	LOC_Os08g41940.1	1	1054	1073	UGACAGAAGAGAGUGAGCAC	GUGCUCUCUCUCUUCUGUCA	Cleavage	cDNA|OsSPL16 - SBP-box gene family member, expressed
									osa-miR156j-5p	LOC_Os08g39890.1	1	992	1011	UGACAGAAGAGAGUGAGCAC	GUGCUCUCUCUCUUCUGUCA	Cleavage	cDNA|OsSPL14 - SBP-box gene family member, expressed
									osa-miR156j-5p	LOC_Os01g69830.1	1	1153	1172	UGACAGAAGAGAGUGAGCAC	GUGCUCUCUCUCUUCUGUCA	Cleavage	cDNA|OsSPL2 - SBP-box gene family member, expressed
									osa-miR156j-5p	LOC_Os06g49010.3	1	1439	1458	UGACAGAAGAGAGUGAGCAC	GUGCUCUCUCUCUUCUGUCA	Cleavage	cDNA|OsSPL12 - SBP-box gene family member, expressed
									osa-miR156j-5p	LOC_Os06g49010.2	1	1494	1513	UGACAGAAGAGAGUGAGCAC	GUGCUCUCUCUCUUCUGUCA	Cleavage	cDNA|OsSPL12 - SBP-box gene family member, expressed
									osa-miR156j-5p	LOC_Os06g49010.4	1	1638	1657	UGACAGAAGAGAGUGAGCAC	GUGCUCUCUCUCUUCUGUCA	Cleavage	cDNA|OsSPL12 - SBP-box gene family member, expressed
									osa-miR156j-5p	LOC_Os06g49010.1	1	1686	1705	UGACAGAAGAGAGUGAGCAC	GUGCUCUCUCUCUUCUGUCA	Cleavage	cDNA|OsSPL12 - SBP-box gene family member, expressed
									osa-miR156j-5p	LOC_Os06g49010.6	1	1842	1861	UGACAGAAGAGAGUGAGCAC	GUGCUCUCUCUCUUCUGUCA	Cleavage	cDNA|OsSPL12 - SBP-box gene family member, expressed
									osa-miR156j-5p	LOC_Os06g49010.5	1	2018	2037	UGACAGAAGAGAGUGAGCAC	GUGCUCUCUCUCUUCUGUCA	Cleavage	cDNA|OsSPL12 - SBP-box gene family member, expressed
									osa-miR156j-5p	LOC_Os02g07780.2	1	2221	2240	UGACAGAAGAGAGUGAGCAC	GUGCUCUCUCUCUUCUGUCA	Cleavage	cDNA|OsSPL4 - SBP-box gene family member, expressed
									osa-miR156j-5p	LOC_Os07g32170.2	1	664	683	UGACAGAAGAGAGUGAGCAC	AUGCUCCCUCUCUUCUGUCA	Cleavage	cDNA|OsSPL13 - SBP-box gene family member, expressed
									osa-miR156j-5p	LOC_Os07g32170.1	1	852	871	UGACAGAAGAGAGUGAGCAC	AUGCUCCCUCUCUUCUGUCA	Cleavage	cDNA|OsSPL13 - SBP-box gene family member, expressed
									osa-miR156j-5p	LOC_Os02g04680.2	1	1962	1981	UGACAGAAGAGAGUGAGCAC	AUGCUCUCUCUCUUCUGUCA	Cleavage	cDNA|OsSPL3 - SBP-box gene family member, expressed
									osa-miR156j-5p	LOC_Os02g04680.1	1	1965	1984	UGACAGAAGAGAGUGAGCAC	AUGCUCUCUCUCUUCUGUCA	Cleavage	cDNA|OsSPL3 - SBP-box gene family member, expressed
									osa-miR156k	LOC_Os07g32170.2	1	663	683	UGACAGAAGAGAGAGAGCACA	CAUGCUCCCUCUCUUCUGUCA	Cleavage	cDNA|OsSPL13 - SBP-box gene family member, expressed
									osa-miR156k	LOC_Os07g32170.1	1	851	871	UGACAGAAGAGAGAGAGCACA	CAUGCUCCCUCUCUUCUGUCA	Cleavage	cDNA|OsSPL13 - SBP-box gene family member, expressed
									osa-miR156k	LOC_Os07g32170.2	1	663	683	UGACAGAAGAGAGAGAGCACA	CAUGCUCCCUCUCUUCUGUCA	Cleavage	cDNA|OsSPL13 - SBP-box gene family member, expressed
									osa-miR156k	LOC_Os07g32170.1	1	851	871	UGACAGAAGAGAGAGAGCACA	CAUGCUCCCUCUCUUCUGUCA	Cleavage	cDNA|OsSPL13 - SBP-box gene family member, expressed
									osa-miR169d	LOC_Os07g41720.1	1	1169	1189	UAGCCAAGGAUGAAUUGCCGG	GUGGCAAUUCAUCCUUGGCUU	Cleavage	cDNA|nuclear transcription factor Y subunit, putative, expressed
									osa-miR169d	LOC_Os07g41720.2	1	1302	1322	UAGCCAAGGAUGAAUUGCCGG	GUGGCAAUUCAUCCUUGGCUU	Cleavage	cDNA|nuclear transcription factor Y subunit, putative, expressed
									osa-miR169d	LOC_Os03g29760.3	1	1264	1284	UAGCCAAGGAUGAAUUGCCGG	GUGGCAAUUCAUCCUUGGCUU	Cleavage	cDNA|nuclear transcription factor Y subunit, putative, expressed
									osa-miR169d	LOC_Os03g29760.1	1	1284	1304	UAGCCAAGGAUGAAUUGCCGG	GUGGCAAUUCAUCCUUGGCUU	Cleavage	cDNA|nuclear transcription factor Y subunit, putative, expressed
									osa-miR169d	LOC_Os03g29760.2	1	1364	1384	UAGCCAAGGAUGAAUUGCCGG	GUGGCAAUUCAUCCUUGGCUU	Cleavage	cDNA|nuclear transcription factor Y subunit, putative, expressed
									osa-miR169d	LOC_Os02g53620.1	1	988	1008	UAGCCAAGGAUGAAUUGCCGG	UAGGCAAUUCAUCCUUGGCUU	Cleavage	cDNA|nuclear transcription factor Y subunit, putative, expressed
									osa-miR172b	LOC_Os05g03040.2	1	1552	1572	GGAAUCUUGAUGAUGCUGCAU	CUGCAGCAUCAUCAGGAUUCU	Cleavage	cDNA|AP2 domain containing protein, expressed
									osa-miR172b	LOC_Os03g60430.1	1	1755	1775	GGAAUCUUGAUGAUGCUGCAU	CUGCAGCAUCAUCAGGAUUCU	Cleavage	cDNA|AP2 domain containing protein, expressed
									osa-miR172b	LOC_Os03g60430.2	1	1767	1787	GGAAUCUUGAUGAUGCUGCAU	CUGCAGCAUCAUCAGGAUUCU	Cleavage	cDNA|AP2 domain containing protein, expressed
									osa-miR172b	LOC_Os07g13170.2	1	1463	1483	GGAAUCUUGAUGAUGCUGCAU	CUGCAGCAUCAUCAGGAUUCU	Cleavage	cDNA|AP2 domain containing protein, expressed
									osa-miR172b	LOC_Os07g13170.1	1	1404	1424	GGAAUCUUGAUGAUGCUGCAU	CUGCAGCAUCAUCAGGAUUCU	Cleavage	cDNA|AP2 domain containing protein, expressed
									osa-miR172b	LOC_Os05g03040.1	1	1976	1996	GGAAUCUUGAUGAUGCUGCAU	CUGCAGCAUCAUCAGGAUUCU	Cleavage	cDNA|AP2 domain containing protein, expressed
									osa-miR172b	LOC_Os05g03040.3	1	2089	2109	GGAAUCUUGAUGAUGCUGCAU	CUGCAGCAUCAUCAGGAUUCU	Cleavage	cDNA|AP2 domain containing protein, expressed
									osa-miR1848	LOC_Os04g40590.1	1	670	690	CCUCGCCGGCGCGCGCGUGCA	UGCGCGCGCGCGUCGGCGAGG	Cleavage	cDNA|wax synthase isoform 1, putative, expressed
									osa-miR1848	LOC_Os08g38520.1	1	136	156	CCUCGCCGGCGCGCGCGUGCA	GACUCGCGCGCGCCGGCGAGG	Cleavage	cDNA|OsFBX302 - F-box domain containing protein, expressed
									osa-miR1858a	LOC_Os03g56060.1	1	94	114	GAGAGGAGGACGGAGUGGGGC	UUCCCACUCCGUCCUCUUCUU	Cleavage	cDNA|CSLC9 - cellulose synthase-like family C, expressed
									osa-miR1858a	LOC_Os04g35880.1	1	30	50	GAGAGGAGGACGGAGUGGGGC	UCCCCCCUCCGUCCUCCUCUC	Cleavage	cDNA|retrotransposon protein, putative, unclassified, expressed
									osa-miR1858a	LOC_Os03g42040.1	1	171	191	GAGAGGAGGACGGAGUGGGGC	CUCCCACCCCGUCCUCCUCUC	Cleavage	cDNA|HEAT repeat family protein, putative, expressed
									osa-miR1858a	LOC_Os03g08390.2	1	2	22	GAGAGGAGGACGGAGUGGGGC	UGCCGACUCCGUCCUCCUCUC	Cleavage	cDNA|expressed protein
									osa-miR1858a	LOC_Os03g08390.1	1	23	43	GAGAGGAGGACGGAGUGGGGC	UGCCGACUCCGUCCUCCUCUC	Cleavage	cDNA|expressed protein
									osa-miR1858b	LOC_Os03g56060.1	1	94	114	GAGAGGAGGACGGAGUGGGGC	UUCCCACUCCGUCCUCUUCUU	Cleavage	cDNA|CSLC9 - cellulose synthase-like family C, expressed
									osa-miR1858b	LOC_Os04g35880.1	1	30	50	GAGAGGAGGACGGAGUGGGGC	UCCCCCCUCCGUCCUCCUCUC	Cleavage	cDNA|retrotransposon protein, putative, unclassified, expressed
									osa-miR1858b	LOC_Os03g42040.1	1	171	191	GAGAGGAGGACGGAGUGGGGC	CUCCCACCCCGUCCUCCUCUC	Cleavage	cDNA|HEAT repeat family protein, putative, expressed
									osa-miR1858b	LOC_Os03g08390.2	1	2	22	GAGAGGAGGACGGAGUGGGGC	UGCCGACUCCGUCCUCCUCUC	Cleavage	cDNA|expressed protein
									osa-miR1858b	LOC_Os03g08390.1	1	23	43	GAGAGGAGGACGGAGUGGGGC	UGCCGACUCCGUCCUCCUCUC	Cleavage	cDNA|expressed protein
									osa-miR1863a	LOC_Os05g13804.1	1	35	58	AGCUCUGAUACCAUGUUAGAUUAG	ACUAUCUAACAUGGUAUCAGAGCG	Cleavage	cDNA|expressed protein
									osa-miR1863b	LOC_Os06g38480.2	1	14	37	AGCUCUGAUACCAUGUUAACUGUU	CACAAUUCACAUGGUAUCAGAGCU	Cleavage	cDNA|retrotransposon protein, putative, unclassified, expressed
									osa-miR1863b	LOC_Os06g38480.1	1	14	37	AGCUCUGAUACCAUGUUAACUGUU	CACAAUUCACAUGGUAUCAGAGCU	Cleavage	cDNA|retrotransposon protein, putative, unclassified, expressed
									osa-miR2102-5p	LOC_Os04g59470.1	1	602	621	GGGCAAGCCGCCGCCGCCAC	CUGGUGGCGGCGGCUUGCUC	Cleavage	cDNA|no apical meristem protein, putative, expressed
									osa-miR2122	LOC_Os12g30080.1	1	927	948	UUUCAAAAAUAACCUUUUGUUC	AUCCAAAUGGUUAUUUUUGAAA	Cleavage	cDNA|disease resistance protein RPM1, putative, expressed
									osa-miR2122	LOC_Os12g30070.1	1	24	45	UUUCAAAAAUAACCUUUUGUUC	CUCCAAAUGGUUAUUUUUGAAA	Cleavage	cDNA|disease resistance protein RPM1, putative, expressed
									osa-miR2873c	LOC_Os08g32130.1	1	1151	1171	CAAAUGAAGUUGAGUUUGGAC	GUCUAAACUCAACUUUAUUUG	Cleavage	cDNA|heat shock protein DnaJ, putative, expressed
									osa-miR2873c	LOC_Os08g32130.2	1	1202	1222	CAAAUGAAGUUGAGUUUGGAC	GUCUAAACUCAACUUUAUUUG	Cleavage	cDNA|heat shock protein DnaJ, putative, expressed
									osa-miR2926	LOC_Os01g40400.1	1	1258	1277	AGGUCGUCGACGUUGGUGCU	AGCAUCAACGUCGGCGACCU	Cleavage	cDNA|histone deacetylase 19, putative, expressed
									osa-miR395a	LOC_Os03g53230.1	1	595	615	GUGAAGUGCUUGGGGGAACUC	GAGUUCCUCCAAGCACUUCAU	Cleavage	cDNA|bifunctional 3-phosphoadenosine 5-phosphosulfate synthetase, putative, expressed
									osa-miR395b	LOC_Os03g09940.1	1	318	338	GUGAAGUGUUUGGGGGAACUC	GAGUUCCCCCAAACACUUCAG	Cleavage	cDNA|sulfate transporter, putative, expressed
									osa-miR395d	LOC_Os03g09940.1	1	318	338	GUGAAGUGUUUGGGGGAACUC	GAGUUCCCCCAAACACUUCAG	Cleavage	cDNA|sulfate transporter, putative, expressed
									osa-miR395e	LOC_Os03g09940.1	1	318	338	GUGAAGUGUUUGGGGGAACUC	GAGUUCCCCCAAACACUUCAG	Cleavage	cDNA|sulfate transporter, putative, expressed
									osa-miR395g	LOC_Os03g09940.1	1	318	338	GUGAAGUGUUUGGGGGAACUC	GAGUUCCCCCAAACACUUCAG	Cleavage	cDNA|sulfate transporter, putative, expressed
									osa-miR395h	LOC_Os03g09940.1	1	318	338	GUGAAGUGUUUGGGGGAACUC	GAGUUCCCCCAAACACUUCAG	Cleavage	cDNA|sulfate transporter, putative, expressed
									osa-miR395i	LOC_Os03g09940.1	1	318	338	GUGAAGUGUUUGGGGGAACUC	GAGUUCCCCCAAACACUUCAG	Cleavage	cDNA|sulfate transporter, putative, expressed
									osa-miR395j	LOC_Os03g09940.1	1	318	338	GUGAAGUGUUUGGGGGAACUC	GAGUUCCCCCAAACACUUCAG	Cleavage	cDNA|sulfate transporter, putative, expressed
									osa-miR395k	LOC_Os03g09940.1	1	318	338	GUGAAGUGUUUGGGGGAACUC	GAGUUCCCCCAAACACUUCAG	Cleavage	cDNA|sulfate transporter, putative, expressed
									osa-miR395l	LOC_Os03g09940.1	1	318	338	GUGAAGUGUUUGGGGGAACUC	GAGUUCCCCCAAACACUUCAG	Cleavage	cDNA|sulfate transporter, putative, expressed
									osa-miR395m	LOC_Os03g09940.1	1	318	338	GUGAAGUGUUUGGGGGAACUC	GAGUUCCCCCAAACACUUCAG	Cleavage	cDNA|sulfate transporter, putative, expressed
									osa-miR395n	LOC_Os03g09940.1	1	318	338	GUGAAGUGUUUGGGGGAACUC	GAGUUCCCCCAAACACUUCAG	Cleavage	cDNA|sulfate transporter, putative, expressed
									osa-miR395p	LOC_Os03g09940.1	1	318	338	GUGAAGUGUUUGGGGGAACUC	GAGUUCCCCCAAACACUUCAG	Cleavage	cDNA|sulfate transporter, putative, expressed
									osa-miR395q	LOC_Os03g09940.1	1	318	338	GUGAAGUGUUUGGGGGAACUC	GAGUUCCCCCAAACACUUCAG	Cleavage	cDNA|sulfate transporter, putative, expressed
									osa-miR395r	LOC_Os03g09940.1	1	318	338	GUGAAGUGUUUGGGGGAACUC	GAGUUCCCCCAAACACUUCAG	Cleavage	cDNA|sulfate transporter, putative, expressed
									osa-miR395s	LOC_Os03g09940.1	1	318	338	GUGAAGUGUUUGGGGGAACUC	GAGUUCCCCCAAACACUUCAG	Cleavage	cDNA|sulfate transporter, putative, expressed
									osa-miR395y	LOC_Os03g09940.1	1	318	338	GUGAAGUGUUUGGGGGAACUC	GAGUUCCCCCAAACACUUCAG	Cleavage	cDNA|sulfate transporter, putative, expressed
									osa-miR397b	LOC_Os01g62490.1	1	761	781	UUAUUGAGUGCAGCGUUGAUG	CAUCAACGCUGCGCUCAAUGA	Cleavage	cDNA|laccase precursor protein, putative, expressed
									osa-miR414	LOC_Os06g22730.1	1	3222	3242	UCAUCCUCAUCAUCAUCGUCC	UGAUGAUGAUGAUGAGGGUGA	Cleavage	cDNA|retrotransposon protein, putative, unclassified, expressed
									osa-miR414	LOC_Os08g32180.1	1	1533	1553	UCAUCCUCAUCAUCAUCGUCC	UGAUGAUGAUGAUGAGGGUGA	Cleavage	cDNA|retrotransposon protein, putative, unclassified, expressed
									osa-miR414	LOC_Os12g31490.1	1	544	564	UCAUCCUCAUCAUCAUCGUCC	UGAUGGUGAUGAUGAGGAUGA	Cleavage	cDNA|expressed protein
									osa-miR414	LOC_Os04g08240.1	1	1425	1445	UCAUCCUCAUCAUCAUCGUCC	UGAUGAUGAUGGUGAGGAUGA	Cleavage	cDNA|expressed protein
									osa-miR414	LOC_Os11g31670.1	1	1173	1193	UCAUCCUCAUCAUCAUCGUCC	UGAUGAUGAUGAUGAGGGUGA	Cleavage	cDNA|retrotransposon protein, putative, unclassified, expressed
									osa-miR414	LOC_Os09g14460.1	1	717	737	UCAUCCUCAUCAUCAUCGUCC	UGAUGAUGAUGAUGAGGGUGA	Cleavage	cDNA|retrotransposon protein, putative, unclassified
									osa-miR414	LOC_Os07g20520.1	1	573	593	UCAUCCUCAUCAUCAUCGUCC	UGAUGAUGAUGAUGGGGAUGA	Cleavage	cDNA|retrotransposon protein, putative, unclassified, expressed
									osa-miR414	LOC_Os09g01610.1	1	638	658	UCAUCCUCAUCAUCAUCGUCC	GUCCGAUGAUGAUGAGGAUGA	Cleavage	cDNA|clumping factor B, putative, expressed
									osa-miR414	LOC_Os08g13740.1	1	333	353	UCAUCCUCAUCAUCAUCGUCC	AGAAGAUGAUGAUGAGGAUGA	Cleavage	cDNA|expressed protein
									osa-miR414	LOC_Os01g51820.1	1	1656	1676	UCAUCCUCAUCAUCAUCGUCC	UCAGGAUGAUGAUGAGGAUGA	Cleavage	cDNA|retrotransposon protein, putative, Ty3-gypsy subclass, expressed
									osa-miR414	LOC_Os01g44180.1	1	225	245	UCAUCCUCAUCAUCAUCGUCC	GUCCGAUGAUGAUGAGGAUGA	Cleavage	cDNA|expressed protein
									osa-miR444b.1	LOC_Os02g49840.1	1	607	627	UGUUGUCUCAAGCUUGCUGCC	GGCAGCAAGCUUGAGGCAGCA	Cleavage	cDNA|OsMADS57 - MADS-box family gene with MIKCc type-box, expressed
									osa-miR444b.1	LOC_Os02g49840.4	1	607	627	UGUUGUCUCAAGCUUGCUGCC	GGCAGCAAGCUUGAGGCAGCA	Cleavage	cDNA|OsMADS57 - MADS-box family gene with MIKCc type-box, expressed
									osa-miR444b.1	LOC_Os02g49840.2	1	607	627	UGUUGUCUCAAGCUUGCUGCC	GGCAGCAAGCUUGAGGCAGCA	Cleavage	cDNA|OsMADS57 - MADS-box family gene with MIKCc type-box, expressed
									osa-miR444b.1	LOC_Os02g49840.3	1	607	627	UGUUGUCUCAAGCUUGCUGCC	GGCAGCAAGCUUGAGGCAGCA	Cleavage	cDNA|OsMADS57 - MADS-box family gene with MIKCc type-box, expressed
									osa-miR444b.1	LOC_Os08g33488.1	1	305	325	UGUUGUCUCAAGCUUGCUGCC	GGCAGCAAGCUUGAGGCAGCA	Cleavage	cDNA|OsMADS23 - MADS-box family gene with MIKCc type-box, expressed
									osa-miR444b.2	LOC_Os08g33488.1	1	311	331	UGCAGUUGUUGUCUCAAGCUU	AAGCUUGAGGCAGCAACUGCA	Cleavage	cDNA|OsMADS23 - MADS-box family gene with MIKCc type-box, expressed
									osa-miR444b.2	LOC_Os02g49840.3	1	613	633	UGCAGUUGUUGUCUCAAGCUU	AAGCUUGAGGCAGCAACUGCA	Cleavage	cDNA|OsMADS57 - MADS-box family gene with MIKCc type-box, expressed
									osa-miR444b.2	LOC_Os02g49840.2	1	613	633	UGCAGUUGUUGUCUCAAGCUU	AAGCUUGAGGCAGCAACUGCA	Cleavage	cDNA|OsMADS57 - MADS-box family gene with MIKCc type-box, expressed
									osa-miR444b.2	LOC_Os02g49840.4	1	613	633	UGCAGUUGUUGUCUCAAGCUU	AAGCUUGAGGCAGCAACUGCA	Cleavage	cDNA|OsMADS57 - MADS-box family gene with MIKCc type-box, expressed
									osa-miR444b.2	LOC_Os02g49840.1	1	613	633	UGCAGUUGUUGUCUCAAGCUU	AAGCUUGAGGCAGCAACUGCA	Cleavage	cDNA|OsMADS57 - MADS-box family gene with MIKCc type-box, expressed
									osa-miR444c.1	LOC_Os02g49840.1	1	607	627	UGUUGUCUCAAGCUUGCUGCC	GGCAGCAAGCUUGAGGCAGCA	Cleavage	cDNA|OsMADS57 - MADS-box family gene with MIKCc type-box, expressed
									osa-miR444c.1	LOC_Os02g49840.4	1	607	627	UGUUGUCUCAAGCUUGCUGCC	GGCAGCAAGCUUGAGGCAGCA	Cleavage	cDNA|OsMADS57 - MADS-box family gene with MIKCc type-box, expressed
									osa-miR444c.1	LOC_Os02g49840.2	1	607	627	UGUUGUCUCAAGCUUGCUGCC	GGCAGCAAGCUUGAGGCAGCA	Cleavage	cDNA|OsMADS57 - MADS-box family gene with MIKCc type-box, expressed
									osa-miR444c.1	LOC_Os02g49840.3	1	607	627	UGUUGUCUCAAGCUUGCUGCC	GGCAGCAAGCUUGAGGCAGCA	Cleavage	cDNA|OsMADS57 - MADS-box family gene with MIKCc type-box, expressed
									osa-miR444c.1	LOC_Os08g33488.1	1	305	325	UGUUGUCUCAAGCUUGCUGCC	GGCAGCAAGCUUGAGGCAGCA	Cleavage	cDNA|OsMADS23 - MADS-box family gene with MIKCc type-box, expressed
									osa-miR444c.2	LOC_Os02g49840.1	1	613	633	UGCAGUUGUUGUCUCAAGCUU	AAGCUUGAGGCAGCAACUGCA	Cleavage	cDNA|OsMADS57 - MADS-box family gene with MIKCc type-box, expressed
									osa-miR444c.2	LOC_Os02g49840.4	1	613	633	UGCAGUUGUUGUCUCAAGCUU	AAGCUUGAGGCAGCAACUGCA	Cleavage	cDNA|OsMADS57 - MADS-box family gene with MIKCc type-box, expressed
									osa-miR444c.2	LOC_Os02g49840.2	1	613	633	UGCAGUUGUUGUCUCAAGCUU	AAGCUUGAGGCAGCAACUGCA	Cleavage	cDNA|OsMADS57 - MADS-box family gene with MIKCc type-box, expressed
									osa-miR444c.2	LOC_Os02g49840.3	1	613	633	UGCAGUUGUUGUCUCAAGCUU	AAGCUUGAGGCAGCAACUGCA	Cleavage	cDNA|OsMADS57 - MADS-box family gene with MIKCc type-box, expressed
									osa-miR444c.2	LOC_Os08g33488.1	1	311	331	UGCAGUUGUUGUCUCAAGCUU	AAGCUUGAGGCAGCAACUGCA	Cleavage	cDNA|OsMADS23 - MADS-box family gene with MIKCc type-box, expressed
									osa-miR444f	LOC_Os08g06510.1	1	1371	1391	UGCAGUUGUUGCCUCAAGCUU	GAGCUUGAGGCAGCAGCUGCA	Cleavage	cDNA|zinc finger, C3HC4 type domain containing protein, expressed
									osa-miR5075	LOC_Os11g11340.1	1	160	180	UUCUCCGUCGCCGCCGUCCGC	GCGGGCGGCGGCGACGGAGGA	Cleavage	cDNA|CIP111, putative, expressed
									osa-miR5075	LOC_Os01g41870.1	1	371	391	UUCUCCGUCGCCGCCGUCCGC	GGGGGCGGCGGCGGCGGAGAA	Cleavage	cDNA|protein kinase, putative, expressed
									osa-miR5075	LOC_Os01g41870.2	1	172	192	UUCUCCGUCGCCGCCGUCCGC	GGGGGCGGCGGCGGCGGAGAA	Cleavage	cDNA|protein kinase, putative, expressed
									osa-miR5075	LOC_Os09g27330.1	1	295	315	UUCUCCGUCGCCGCCGUCCGC	UCGGGCGGCGGCGACGGAGAG	Cleavage	cDNA|oxidoreductase/ transition metal ion binding protein, putative, expressed
									osa-miR5082	LOC_Os05g49480.1	1	65	88	UGCGAUGAUGGCCGCGCGGGUUCA	CGCCGCCGCGCGGCCAUCGUCGCG	Cleavage	cDNA|transcription factor-related, putative, expressed
									osa-miR5160	LOC_Os10g36130.1	1	145	166	CGAGAUCGAUGGUAUAUUUCUG	AAGAAAUAUACCGUCGGUCUCG	Cleavage	cDNA|hypothetical protein
									osa-miR5160	LOC_Os01g26090.1	1	178	199	CGAGAUCGAUGGUAUAUUUCUG	CAAAAAUAUACCGUCGAUUUCG	Cleavage	cDNA|expressed protein
									osa-miR5160	LOC_Os12g39940.1	1	509	530	CGAGAUCGAUGGUAUAUUUCUG	CACAAAUAUACUAUCGGUCUCG	Cleavage	cDNA|retrotransposon protein, putative, unclassified, expressed
									osa-miR5160	LOC_Os05g50580.1	1	1645	1666	CGAGAUCGAUGGUAUAUUUCUG	CGAAAAUAUAUCGUCGAUCUCG	Cleavage	cDNA|OsSCP30 - Putative Serine Carboxypeptidase homologue, expressed
									osa-miR5540	LOC_Os01g26090.1	1	184	204	UUGUGCGAGAUCGACGGUAUA	UAUACCGUCGAUUUCGUACAA	Cleavage	cDNA|expressed protein
									osa-miR5540	LOC_Os05g50580.1	1	1651	1671	UUGUGCGAGAUCGACGGUAUA	UAUAUCGUCGAUCUCGUACAA	Cleavage	cDNA|OsSCP30 - Putative Serine Carboxypeptidase homologue, expressed
									osa-miR5796	LOC_Os10g26430.1	1	1095	1115	UCAUUCAGGAUUGAAGCCGCC	AUUGGCUUCAGUCCUGAAUGA	Cleavage	cDNA|agenet domain containing protein, expressed
									osa-miR5802	LOC_Os02g21770.1	1	190	209	AUGGACUGUACUUUGUAAAG	UAUUACAAAGUACAGUCCAU	Cleavage	cDNA|expressed protein
									osa-miR5809	LOC_Os05g25220.1	1	321	340	UCGUCGCCGGCGACCACAGC	ACUCUGGUCGCCGGCGACGA	Cleavage	cDNA|expressed protein
									osa-miR5831	LOC_Os09g13440.2	1	763	786	UAGUCAAACUUAGAAUAGUUGGAC	GUCAAACUGUUUUAAGUUUGACUA	Cleavage	cDNA|expressed protein
									osa-miR5831	LOC_Os03g01570.2	1	1661	1684	UAGUCAAACUUAGAAUAGUUGGAC	GUCAAACUGUUUUAAGUUUGACUA	Cleavage	cDNA|expressed protein
									osa-miR5831	LOC_Os03g01570.1	1	1796	1819	UAGUCAAACUUAGAAUAGUUGGAC	GUCAAACUGUUUUAAGUUUGACUA	Cleavage	cDNA|expressed protein
									osa-miR6249a	LOC_Os06g38480.1	1	69	88	CGUGAAGAGCUCGCCGGCGG	CCGCCGGCGAGCUCUUCACC	Cleavage	cDNA|retrotransposon protein, putative, unclassified, expressed
									osa-miR6249a	LOC_Os06g38480.2	1	69	88	CGUGAAGAGCUCGCCGGCGG	CCGCCGGCGAGCUCUUCACC	Cleavage	cDNA|retrotransposon protein, putative, unclassified, expressed
									osa-miR6249a	LOC_Os05g44792.1	1	26	45	CGUGAAGAGCUCGCCGGCGG	CCGCAGGCGAGCUCUUCACG	Cleavage	cDNA|expressed protein
									osa-miR6249a	LOC_Os09g38640.1	1	266	285	CGUGAAGAGCUCGCCGGCGG	ACGUCGGCGAGCUCUUCGCG	Cleavage	cDNA|IBR domain containing protein, putative, expressed
									osa-miR6249b	LOC_Os06g38480.1	1	69	88	CGUGAAGAGCUCGCCGGCGG	CCGCCGGCGAGCUCUUCACC	Cleavage	cDNA|retrotransposon protein, putative, unclassified, expressed
									osa-miR6249b	LOC_Os06g38480.2	1	69	88	CGUGAAGAGCUCGCCGGCGG	CCGCCGGCGAGCUCUUCACC	Cleavage	cDNA|retrotransposon protein, putative, unclassified, expressed
									osa-miR6249b	LOC_Os05g44792.1	1	26	45	CGUGAAGAGCUCGCCGGCGG	CCGCAGGCGAGCUCUUCACG	Cleavage	cDNA|expressed protein
									osa-miR6249b	LOC_Os09g38640.1	1	266	285	CGUGAAGAGCUCGCCGGCGG	ACGUCGGCGAGCUCUUCGCG	Cleavage	cDNA|IBR domain containing protein, putative, expressed
									osa-miR812a	LOC_Os01g06740.1	1	1199	1220	GACGGACGGUUAAACGUUGGAC	GUCCAACGUUUGACUGUCCGUC	Cleavage	cDNA|ribosome inactivating protein, putative, expressed
									osa-miR812a	LOC_Os03g12620.2	1	1596	1617	GACGGACGGUUAAACGUUGGAC	GUCUAACGUUUGACCGUCCGUC	Cleavage	cDNA|glycosyl hydrolases family 17, putative, expressed
									osa-miR812a	LOC_Os03g12620.1	1	1608	1629	GACGGACGGUUAAACGUUGGAC	GUCUAACGUUUGACCGUCCGUC	Cleavage	cDNA|glycosyl hydrolases family 17, putative, expressed
									osa-miR812a	LOC_Os09g32940.2	1	1529	1550	GACGGACGGUUAAACGUUGGAC	GUCCAACGUUUGACCGUCUGUC	Cleavage	cDNA|expressed protein
									osa-miR812a	LOC_Os03g24730.1	1	89	110	GACGGACGGUUAAACGUUGGAC	GUCCAACGUUUGACUGUCCGUC	Cleavage	cDNA|expressed protein
									osa-miR812a	LOC_Os10g25230.1	1	933	954	GACGGACGGUUAAACGUUGGAC	AUCCAAUGUUUGACCGUCCGUC	Cleavage	cDNA|ZIM domain containing protein, putative, expressed
									osa-miR812a	LOC_Os09g37540.1	1	1172	1193	GACGGACGGUUAAACGUUGGAC	AUUCAACGUUUGACCGUUCGUC	Cleavage	cDNA|uncharacterized protein PA4923, putative, expressed
									osa-miR812a	LOC_Os12g09570.2	1	2769	2790	GACGGACGGUUAAACGUUGGAC	UGCCAACGUUUGACUGUCCGUC	Cleavage	cDNA|GTP binding protein, putative, expressed
									osa-miR812a	LOC_Os06g04830.1	1	3587	3608	GACGGACGGUUAAACGUUGGAC	ACCCAAUGUUUGACCGUCCGUC	Cleavage	cDNA|leucine rich repeat protein, putative, expressed
									osa-miR812b	LOC_Os01g06740.1	1	1199	1220	GACGGACGGUUAAACGUUGGAC	GUCCAACGUUUGACUGUCCGUC	Cleavage	cDNA|ribosome inactivating protein, putative, expressed
									osa-miR812b	LOC_Os03g12620.2	1	1596	1617	GACGGACGGUUAAACGUUGGAC	GUCUAACGUUUGACCGUCCGUC	Cleavage	cDNA|glycosyl hydrolases family 17, putative, expressed
									osa-miR812b	LOC_Os03g12620.1	1	1608	1629	GACGGACGGUUAAACGUUGGAC	GUCUAACGUUUGACCGUCCGUC	Cleavage	cDNA|glycosyl hydrolases family 17, putative, expressed
									osa-miR812b	LOC_Os09g32940.2	1	1529	1550	GACGGACGGUUAAACGUUGGAC	GUCCAACGUUUGACCGUCUGUC	Cleavage	cDNA|expressed protein
									osa-miR812b	LOC_Os03g24730.1	1	89	110	GACGGACGGUUAAACGUUGGAC	GUCCAACGUUUGACUGUCCGUC	Cleavage	cDNA|expressed protein
									osa-miR812b	LOC_Os10g25230.1	1	933	954	GACGGACGGUUAAACGUUGGAC	AUCCAAUGUUUGACCGUCCGUC	Cleavage	cDNA|ZIM domain containing protein, putative, expressed
									osa-miR812b	LOC_Os09g37540.1	1	1172	1193	GACGGACGGUUAAACGUUGGAC	AUUCAACGUUUGACCGUUCGUC	Cleavage	cDNA|uncharacterized protein PA4923, putative, expressed
									osa-miR812b	LOC_Os12g09570.2	1	2769	2790	GACGGACGGUUAAACGUUGGAC	UGCCAACGUUUGACUGUCCGUC	Cleavage	cDNA|GTP binding protein, putative, expressed
									osa-miR812b	LOC_Os06g04830.1	1	3587	3608	GACGGACGGUUAAACGUUGGAC	ACCCAAUGUUUGACCGUCCGUC	Cleavage	cDNA|leucine rich repeat protein, putative, expressed
									osa-miR812c	LOC_Os01g06740.1	1	1199	1220	GACGGACGGUUAAACGUUGGAC	GUCCAACGUUUGACUGUCCGUC	Cleavage	cDNA|ribosome inactivating protein, putative, expressed
									osa-miR812c	LOC_Os03g12620.2	1	1596	1617	GACGGACGGUUAAACGUUGGAC	GUCUAACGUUUGACCGUCCGUC	Cleavage	cDNA|glycosyl hydrolases family 17, putative, expressed
									osa-miR812c	LOC_Os03g12620.1	1	1608	1629	GACGGACGGUUAAACGUUGGAC	GUCUAACGUUUGACCGUCCGUC	Cleavage	cDNA|glycosyl hydrolases family 17, putative, expressed
									osa-miR812c	LOC_Os09g32940.2	1	1529	1550	GACGGACGGUUAAACGUUGGAC	GUCCAACGUUUGACCGUCUGUC	Cleavage	cDNA|expressed protein
									osa-miR812c	LOC_Os03g24730.1	1	89	110	GACGGACGGUUAAACGUUGGAC	GUCCAACGUUUGACUGUCCGUC	Cleavage	cDNA|expressed protein
									osa-miR812c	LOC_Os10g25230.1	1	933	954	GACGGACGGUUAAACGUUGGAC	AUCCAAUGUUUGACCGUCCGUC	Cleavage	cDNA|ZIM domain containing protein, putative, expressed
									osa-miR812c	LOC_Os09g37540.1	1	1172	1193	GACGGACGGUUAAACGUUGGAC	AUUCAACGUUUGACCGUUCGUC	Cleavage	cDNA|uncharacterized protein PA4923, putative, expressed
									osa-miR812c	LOC_Os12g09570.2	1	2769	2790	GACGGACGGUUAAACGUUGGAC	UGCCAACGUUUGACUGUCCGUC	Cleavage	cDNA|GTP binding protein, putative, expressed
									osa-miR812c	LOC_Os06g04830.1	1	3587	3608	GACGGACGGUUAAACGUUGGAC	ACCCAAUGUUUGACCGUCCGUC	Cleavage	cDNA|leucine rich repeat protein, putative, expressed
									osa-miR812d	LOC_Os01g06740.1	1	1199	1220	GACGGACGGUUAAACGUUGGAC	GUCCAACGUUUGACUGUCCGUC	Cleavage	cDNA|ribosome inactivating protein, putative, expressed
									osa-miR812d	LOC_Os03g12620.2	1	1596	1617	GACGGACGGUUAAACGUUGGAC	GUCUAACGUUUGACCGUCCGUC	Cleavage	cDNA|glycosyl hydrolases family 17, putative, expressed
									osa-miR812d	LOC_Os03g12620.1	1	1608	1629	GACGGACGGUUAAACGUUGGAC	GUCUAACGUUUGACCGUCCGUC	Cleavage	cDNA|glycosyl hydrolases family 17, putative, expressed
									osa-miR812d	LOC_Os09g32940.2	1	1529	1550	GACGGACGGUUAAACGUUGGAC	GUCCAACGUUUGACCGUCUGUC	Cleavage	cDNA|expressed protein
									osa-miR812d	LOC_Os03g24730.1	1	89	110	GACGGACGGUUAAACGUUGGAC	GUCCAACGUUUGACUGUCCGUC	Cleavage	cDNA|expressed protein
									osa-miR812d	LOC_Os10g25230.1	1	933	954	GACGGACGGUUAAACGUUGGAC	AUCCAAUGUUUGACCGUCCGUC	Cleavage	cDNA|ZIM domain containing protein, putative, expressed
									osa-miR812d	LOC_Os09g37540.1	1	1172	1193	GACGGACGGUUAAACGUUGGAC	AUUCAACGUUUGACCGUUCGUC	Cleavage	cDNA|uncharacterized protein PA4923, putative, expressed
									osa-miR812d	LOC_Os12g09570.2	1	2769	2790	GACGGACGGUUAAACGUUGGAC	UGCCAACGUUUGACUGUCCGUC	Cleavage	cDNA|GTP binding protein, putative, expressed
									osa-miR812d	LOC_Os06g04830.1	1	3587	3608	GACGGACGGUUAAACGUUGGAC	ACCCAAUGUUUGACCGUCCGUC	Cleavage	cDNA|leucine rich repeat protein, putative, expressed
									osa-miR812e	LOC_Os01g06740.1	1	1199	1220	GACGGACGGUUAAACGUUGGAC	GUCCAACGUUUGACUGUCCGUC	Cleavage	cDNA|ribosome inactivating protein, putative, expressed
									osa-miR812e	LOC_Os03g12620.2	1	1596	1617	GACGGACGGUUAAACGUUGGAC	GUCUAACGUUUGACCGUCCGUC	Cleavage	cDNA|glycosyl hydrolases family 17, putative, expressed
									osa-miR812e	LOC_Os03g12620.1	1	1608	1629	GACGGACGGUUAAACGUUGGAC	GUCUAACGUUUGACCGUCCGUC	Cleavage	cDNA|glycosyl hydrolases family 17, putative, expressed
									osa-miR812e	LOC_Os09g32940.2	1	1529	1550	GACGGACGGUUAAACGUUGGAC	GUCCAACGUUUGACCGUCUGUC	Cleavage	cDNA|expressed protein
									osa-miR812e	LOC_Os03g24730.1	1	89	110	GACGGACGGUUAAACGUUGGAC	GUCCAACGUUUGACUGUCCGUC	Cleavage	cDNA|expressed protein
									osa-miR812e	LOC_Os10g25230.1	1	933	954	GACGGACGGUUAAACGUUGGAC	AUCCAAUGUUUGACCGUCCGUC	Cleavage	cDNA|ZIM domain containing protein, putative, expressed
									osa-miR812e	LOC_Os09g37540.1	1	1172	1193	GACGGACGGUUAAACGUUGGAC	AUUCAACGUUUGACCGUUCGUC	Cleavage	cDNA|uncharacterized protein PA4923, putative, expressed
									osa-miR812e	LOC_Os12g09570.2	1	2769	2790	GACGGACGGUUAAACGUUGGAC	UGCCAACGUUUGACUGUCCGUC	Cleavage	cDNA|GTP binding protein, putative, expressed
									osa-miR812e	LOC_Os06g04830.1	1	3587	3608	GACGGACGGUUAAACGUUGGAC	ACCCAAUGUUUGACCGUCCGUC	Cleavage	cDNA|leucine rich repeat protein, putative, expressed
									osa-miR812f	LOC_Os02g53180.2	1	1365	1388	ACGGAUGAUUAAAGUUGGACACGG	CCGCGUCCAACUUUGAUCGUCCGU	Cleavage	cDNA|1-aminocyclopropane-1-carboxylate oxidase protein, putative, expressed
									osa-miR812g	LOC_Os02g53180.2	1	1368	1391	AAGACGGAUGAUUAAAGUUGGACA	CGUCCAACUUUGAUCGUCCGUCUU	Cleavage	cDNA|1-aminocyclopropane-1-carboxylate oxidase protein, putative, expressed
									osa-miR812g	LOC_Os11g25510.1	1	1471	1494	AAGACGGAUGAUUAAAGUUGGACA	UGCACAACUUUAAUUAUUCGUCUU	Cleavage	cDNA|protein kinase domain containing protein, expressed
									osa-miR812h	LOC_Os02g53180.2	1	1368	1391	AAGACGGAUGAUUAAAGUUGGACA	CGUCCAACUUUGAUCGUCCGUCUU	Cleavage	cDNA|1-aminocyclopropane-1-carboxylate oxidase protein, putative, expressed
									osa-miR812h	LOC_Os11g25510.1	1	1471	1494	AAGACGGAUGAUUAAAGUUGGACA	UGCACAACUUUAAUUAUUCGUCUU	Cleavage	cDNA|protein kinase domain containing protein, expressed
									osa-miR812i	LOC_Os02g53180.2	1	1368	1391	AAGACGGAUGAUUAAAGUUGGACA	CGUCCAACUUUGAUCGUCCGUCUU	Cleavage	cDNA|1-aminocyclopropane-1-carboxylate oxidase protein, putative, expressed
									osa-miR812i	LOC_Os11g25510.1	1	1471	1494	AAGACGGAUGAUUAAAGUUGGACA	UGCACAACUUUAAUUAUUCGUCUU	Cleavage	cDNA|protein kinase domain containing protein, expressed
									osa-miR812j	LOC_Os02g53180.2	1	1368	1391	AAGACGGAUGAUUAAAGUUGGACA	CGUCCAACUUUGAUCGUCCGUCUU	Cleavage	cDNA|1-aminocyclopropane-1-carboxylate oxidase protein, putative, expressed
									osa-miR812j	LOC_Os11g25510.1	1	1471	1494	AAGACGGAUGAUUAAAGUUGGACA	UGCACAACUUUAAUUAUUCGUCUU	Cleavage	cDNA|protein kinase domain containing protein, expressed
									osa-miR816	LOC_Os10g32405.1	1	315	334	GUGACAUAUUUUACUACAAC	AUUGUAGUAGAAUGUGUCAC	Cleavage	cDNA|expressed protein
									osa-miR1320-3p	LOC_Os03g13800.1	1.5	878	898	UGUAAAAUUCAUUCGUUCCAA	UUGGAAUGGAUGAAUUUUGCA	Cleavage	cDNA|ribosomal protein L7Ae, putative, expressed
									osa-miR1320-3p	LOC_Os05g38590.3	1.5	512	532	UGUAAAAUUCAUUCGUUCCAA	UUGGAACGGAUGAAUUUUGCG	Cleavage	cDNA|expressed protein
									osa-miR1320-5p	LOC_Os05g47550.1	1.5	2223	2243	UGGAACGGAGGAAUUUUAUAG	CUAUGAAAUUCCUUUGUUCCA	Cleavage	cDNA|ANTH/ENTH domain containing protein, putative, expressed
									osa-miR1435	LOC_Os03g42280.1	1.5	2799	2818	UUUCUUAAGUCAAACUUUUU	AAAAGGUUUGACUUAAGGGA	Cleavage	cDNA|B3 DNA binding domain containing protein, expressed
									osa-miR1435	LOC_Os03g42280.2	1.5	3341	3360	UUUCUUAAGUCAAACUUUUU	AAAAGGUUUGACUUAAGGGA	Cleavage	cDNA|B3 DNA binding domain containing protein, expressed
									osa-miR1439	LOC_Os08g44210.1	1.5	697	717	UUUUGGAACGGAGUGAGUAUU	AAUACUCCCUCCGUUUCAAAA	Cleavage	cDNA|dihydroneopterin aldolase, putative, expressed
									osa-miR1439	LOC_Os02g33170.1	1.5	806	826	UUUUGGAACGGAGUGAGUAUU	AAUACUCCCUCCGUUUCAAAA	Cleavage	cDNA|POEI29 - Pollen Ole e I allergen and extensin family protein precursor, putative, expressed
									osa-miR1439	LOC_Os03g09230.2	1.5	830	850	UUUUGGAACGGAGUGAGUAUU	GAUACUCCCUCCGUUUCAAAA	Cleavage	cDNA|LTPL69 - Protease inhibitor/seed storage/LTP family protein precursor, expressed
									osa-miR1439	LOC_Os01g13560.1	1.5	735	755	UUUUGGAACGGAGUGAGUAUU	AGUACUCUCUCCGUUCUAAAA	Cleavage	cDNA|membrane associated DUF588 domain containing protein, putative, expressed
									osa-miR1439	LOC_Os02g22100.1	1.5	1559	1579	UUUUGGAACGGAGUGAGUAUU	GAUACUUUCUCCGUUCCAAAA	Cleavage	cDNA|OsRhmbd6 - Putative Rhomboid homologue, expressed
									osa-miR1439	LOC_Os02g22100.2	1.5	1569	1589	UUUUGGAACGGAGUGAGUAUU	GAUACUUUCUCCGUUCCAAAA	Cleavage	cDNA|OsRhmbd6 - Putative Rhomboid homologue, expressed
									osa-miR1439	LOC_Os02g22100.5	1.5	1578	1598	UUUUGGAACGGAGUGAGUAUU	GAUACUUUCUCCGUUCCAAAA	Cleavage	cDNA|OsRhmbd6 - Putative Rhomboid homologue, expressed
									osa-miR1439	LOC_Os02g22100.4	1.5	1584	1604	UUUUGGAACGGAGUGAGUAUU	GAUACUUUCUCCGUUCCAAAA	Cleavage	cDNA|OsRhmbd6 - Putative Rhomboid homologue, expressed
									osa-miR1439	LOC_Os02g22100.6	1.5	1616	1636	UUUUGGAACGGAGUGAGUAUU	GAUACUUUCUCCGUUCCAAAA	Cleavage	cDNA|OsRhmbd6 - Putative Rhomboid homologue, expressed
									osa-miR1439	LOC_Os02g22100.3	1.5	1693	1713	UUUUGGAACGGAGUGAGUAUU	GAUACUUUCUCCGUUCCAAAA	Cleavage	cDNA|OsRhmbd6 - Putative Rhomboid homologue, expressed
									osa-miR1439	LOC_Os06g18980.1	1.5	485	505	UUUUGGAACGGAGUGAGUAUU	UAUACUCCCUCCGUUUCAAAA	Cleavage	cDNA|expressed protein
									osa-miR1439	LOC_Os12g21784.1	1.5	424	444	UUUUGGAACGGAGUGAGUAUU	AGUACUCCCUCCGUUCUAAAA	Cleavage	cDNA|expressed protein
									osa-miR1439	LOC_Os02g43370.1	1.5	2229	2249	UUUUGGAACGGAGUGAGUAUU	AGUACUCCCUCCGUUUCAAAA	Cleavage	cDNA|transposon protein, putative, unclassified, expressed
									osa-miR1439	LOC_Os12g01955.1	1.5	231	251	UUUUGGAACGGAGUGAGUAUU	UGUACUCACUCCGUACCAAAA	Cleavage	cDNA|expressed protein
									osa-miR1439	LOC_Os12g38051.1	1.5	711	731	UUUUGGAACGGAGUGAGUAUU	ACUACUCCCUCCGUUUCAAAA	Cleavage	cDNA|metallothionein, putative, expressed
									osa-miR1439	LOC_Os10g13694.3	1.5	299	319	UUUUGGAACGGAGUGAGUAUU	ACUACUCCCUCCGUUCUAAAA	Cleavage	cDNA|expressed protein
									osa-miR1439	LOC_Os10g13694.2	1.5	299	319	UUUUGGAACGGAGUGAGUAUU	ACUACUCCCUCCGUUCUAAAA	Cleavage	cDNA|expressed protein
									osa-miR1439	LOC_Os07g49140.1	1.5	3087	3107	UUUUGGAACGGAGUGAGUAUU	UGUACUCCCUCCGUUUCAAAA	Cleavage	cDNA|expressed protein
									osa-miR1439	LOC_Os02g13210.1	1.5	308	328	UUUUGGAACGGAGUGAGUAUU	ACUACUCCCUCCGUUUCAAAA	Cleavage	cDNA|transposable element protein, putative, containing Pfam profile: PF03004, Transposase_24, expressed
									osa-miR1439	LOC_Os07g49480.1	1.5	3928	3948	UUUUGGAACGGAGUGAGUAUU	UGUACUCCCUCUGUUCCAAAA	Cleavage	cDNA|KIP1, putative, expressed
									osa-miR1439	LOC_Os07g49480.2	1.5	4034	4054	UUUUGGAACGGAGUGAGUAUU	UGUACUCCCUCUGUUCCAAAA	Cleavage	cDNA|KIP1, putative, expressed
									osa-miR1439	LOC_Os10g13694.1	1.5	2220	2240	UUUUGGAACGGAGUGAGUAUU	ACUACUCCCUCCGUUCUAAAA	Cleavage	cDNA|expressed protein
									osa-miR1439	LOC_Os03g12140.2	1.5	72	92	UUUUGGAACGGAGUGAGUAUU	CUUACUUCCUCCGUUCCAAAA	Cleavage	cDNA|glucan endo-1,3-beta-glucosidase precursor, putative, expressed
									osa-miR1439	LOC_Os01g57630.1	1.5	1815	1835	UUUUGGAACGGAGUGAGUAUU	UUUACUUCCUCCGUUCCAAAA	Cleavage	cDNA|pentatricopeptide containing protein, putative, expressed
									osa-miR156k	LOC_Os05g05170.1	1.5	571	591	UGACAGAAGAGAGAGAGCACA	CAUGCGUUCUCUCUUCUGUCA	Cleavage	cDNA|jacalin-like lectin domain containing protein, expressed
									osa-miR156k	LOC_Os05g05170.1	1.5	571	591	UGACAGAAGAGAGAGAGCACA	CAUGCGUUCUCUCUUCUGUCA	Cleavage	cDNA|jacalin-like lectin domain containing protein, expressed
									osa-miR159a.1	LOC_Os01g12700.1	1.5	803	823	UUUGGAUUGAAGGGAGCUCUG	UGGAGCUCCCUUUAAUCCAAU	Cleavage	cDNA|MYB family transcription factor, putative
									osa-miR159a.1	LOC_Os05g41166.1	1.5	1068	1088	UUUGGAUUGAAGGGAGCUCUG	UGGAGCUCCCUUUAAUCCAAU	Cleavage	cDNA|MYB family transcription factor, putative, expressed
									osa-miR159b	LOC_Os01g12700.1	1.5	803	823	UUUGGAUUGAAGGGAGCUCUG	UGGAGCUCCCUUUAAUCCAAU	Cleavage	cDNA|MYB family transcription factor, putative
									osa-miR159b	LOC_Os05g41166.1	1.5	1068	1088	UUUGGAUUGAAGGGAGCUCUG	UGGAGCUCCCUUUAAUCCAAU	Cleavage	cDNA|MYB family transcription factor, putative, expressed
									osa-miR169d	LOC_Os03g48970.4	1.5	1228	1248	UAGCCAAGGAUGAAUUGCCGG	CAGGCAAUUCAUUCUUGGCUU	Cleavage	cDNA|nuclear transcription factor Y subunit, putative, expressed
									osa-miR169d	LOC_Os03g48970.1	1.5	1236	1256	UAGCCAAGGAUGAAUUGCCGG	CAGGCAAUUCAUUCUUGGCUU	Cleavage	cDNA|nuclear transcription factor Y subunit, putative, expressed
									osa-miR169d	LOC_Os03g48970.2	1.5	1765	1785	UAGCCAAGGAUGAAUUGCCGG	CAGGCAAUUCAUUCUUGGCUU	Cleavage	cDNA|nuclear transcription factor Y subunit, putative, expressed
									osa-miR169d	LOC_Os03g48970.3	1.5	1935	1955	UAGCCAAGGAUGAAUUGCCGG	CAGGCAAUUCAUUCUUGGCUU	Cleavage	cDNA|nuclear transcription factor Y subunit, putative, expressed
									osa-miR169n	LOC_Os12g42400.2	1.5	1202	1222	UAGCCAAGAAUGACUUGCCUA	UAGGCAACUCAUUCUUGGCUG	Cleavage	cDNA|nuclear transcription factor Y subunit, putative, expressed
									osa-miR169n	LOC_Os12g42400.3	1.5	1247	1267	UAGCCAAGAAUGACUUGCCUA	UAGGCAACUCAUUCUUGGCUG	Cleavage	cDNA|nuclear transcription factor Y subunit, putative, expressed
									osa-miR169n	LOC_Os12g42400.1	1.5	1256	1276	UAGCCAAGAAUGACUUGCCUA	UAGGCAACUCAUUCUUGGCUG	Cleavage	cDNA|nuclear transcription factor Y subunit, putative, expressed
									osa-miR169o	LOC_Os12g42400.2	1.5	1202	1222	UAGCCAAGAAUGACUUGCCUA	UAGGCAACUCAUUCUUGGCUG	Cleavage	cDNA|nuclear transcription factor Y subunit, putative, expressed
									osa-miR169o	LOC_Os12g42400.3	1.5	1247	1267	UAGCCAAGAAUGACUUGCCUA	UAGGCAACUCAUUCUUGGCUG	Cleavage	cDNA|nuclear transcription factor Y subunit, putative, expressed
									osa-miR169o	LOC_Os12g42400.1	1.5	1256	1276	UAGCCAAGAAUGACUUGCCUA	UAGGCAACUCAUUCUUGGCUG	Cleavage	cDNA|nuclear transcription factor Y subunit, putative, expressed
									osa-miR171d-5p	LOC_Os03g04300.1	1.5	2212	2232	UGUUGGCCCGGCUCACUCAGA	UCUGAGUGAGCCGAGCCAACA	Cleavage	cDNA|ankyrin repeat domain containing protein, expressed
									osa-miR172a	LOC_Os06g43220.1	1.5	1480	1500	AGAAUCUUGAUGAUGCUGCAU	CUGCAGCAUCAUCAGGAUUCC	Cleavage	cDNA|AP2 domain containing protein, expressed
									osa-miR172a	LOC_Os02g56320.1	1.5	509	529	AGAAUCUUGAUGAUGCUGCAU	UAGCAGAAUCAUCAAGGUUCU	Cleavage	cDNA|glycogen synthase 1, putative, expressed
									osa-miR172b	LOC_Os04g55560.4	1.5	807	827	GGAAUCUUGAUGAUGCUGCAU	CUGCAGCAUCAUCACGAUUCC	Cleavage	cDNA|AP2 domain containing protein, expressed
									osa-miR172b	LOC_Os04g55560.2	1.5	1623	1643	GGAAUCUUGAUGAUGCUGCAU	CUGCAGCAUCAUCACGAUUCC	Cleavage	cDNA|AP2 domain containing protein, expressed
									osa-miR172b	LOC_Os04g55560.3	1.5	1634	1654	GGAAUCUUGAUGAUGCUGCAU	CUGCAGCAUCAUCACGAUUCC	Cleavage	cDNA|AP2 domain containing protein, expressed
									osa-miR172b	LOC_Os05g45980.1	1.5	320	340	GGAAUCUUGAUGAUGCUGCAU	AAGCAUUAUCAUCAAGAUUCC	Cleavage	cDNA|expressed protein
									osa-miR172c	LOC_Os05g03040.2	1.5	1552	1572	UGAAUCUUGAUGAUGCUGCAC	CUGCAGCAUCAUCAGGAUUCU	Cleavage	cDNA|AP2 domain containing protein, expressed
									osa-miR172c	LOC_Os06g43220.1	1.5	1480	1500	UGAAUCUUGAUGAUGCUGCAC	CUGCAGCAUCAUCAGGAUUCC	Cleavage	cDNA|AP2 domain containing protein, expressed
									osa-miR172c	LOC_Os03g60430.1	1.5	1755	1775	UGAAUCUUGAUGAUGCUGCAC	CUGCAGCAUCAUCAGGAUUCU	Cleavage	cDNA|AP2 domain containing protein, expressed
									osa-miR172c	LOC_Os03g60430.2	1.5	1767	1787	UGAAUCUUGAUGAUGCUGCAC	CUGCAGCAUCAUCAGGAUUCU	Cleavage	cDNA|AP2 domain containing protein, expressed
									osa-miR172c	LOC_Os07g13170.2	1.5	1463	1483	UGAAUCUUGAUGAUGCUGCAC	CUGCAGCAUCAUCAGGAUUCU	Cleavage	cDNA|AP2 domain containing protein, expressed
									osa-miR172c	LOC_Os07g13170.1	1.5	1404	1424	UGAAUCUUGAUGAUGCUGCAC	CUGCAGCAUCAUCAGGAUUCU	Cleavage	cDNA|AP2 domain containing protein, expressed
									osa-miR172c	LOC_Os05g03040.1	1.5	1976	1996	UGAAUCUUGAUGAUGCUGCAC	CUGCAGCAUCAUCAGGAUUCU	Cleavage	cDNA|AP2 domain containing protein, expressed
									osa-miR172c	LOC_Os05g03040.3	1.5	2089	2109	UGAAUCUUGAUGAUGCUGCAC	CUGCAGCAUCAUCAGGAUUCU	Cleavage	cDNA|AP2 domain containing protein, expressed
									osa-miR172c	LOC_Os08g39630.1	1.5	1868	1888	UGAAUCUUGAUGAUGCUGCAC	CAGUGGCAUCAUCAGGAUUCA	Cleavage	cDNA|helix-loop-helix DNA-binding domain containing protein, expressed
									osa-miR172d-3p	LOC_Os06g43220.1	1.5	1480	1500	AGAAUCUUGAUGAUGCUGCAU	CUGCAGCAUCAUCAGGAUUCC	Cleavage	cDNA|AP2 domain containing protein, expressed
									osa-miR172d-3p	LOC_Os02g56320.1	1.5	509	529	AGAAUCUUGAUGAUGCUGCAU	UAGCAGAAUCAUCAAGGUUCU	Cleavage	cDNA|glycogen synthase 1, putative, expressed
									osa-miR172d-5p	LOC_Os06g06050.1	1.5	1200	1219	GCAGCACCAUCAAGAUUCAC	UUGCAUCUUGAUGGUGUUGC	Cleavage	cDNA|OsFBL27 - F-box domain and LRR containing protein, expressed
									osa-miR1847.2	LOC_Os05g36186.1	1.5	494	517	UGGCCCACAUGUUAGUGCCACAAC	GGAGAGGCACUGACAUGUGGGCCC	Cleavage	cDNA|expressed protein
									osa-miR1847.2	LOC_Os07g41460.1	1.5	1123	1146	UGGCCCACAUGUUAGUGCCACAAC	CGUCAGUCACUGACAUGUGGGCCA	Cleavage	cDNA|sulfotransferase domain containing protein, expressed
									osa-miR1848	LOC_Os06g43170.1	1.5	2218	2238	CCUCGCCGGCGCGCGCGUGCA	AGCACGGGCGCGUCGGCGAGG	Cleavage	cDNA|transposon protein, putative, unclassified, expressed
									osa-miR1848	LOC_Os07g42420.1	1.5	283	303	CCUCGCCGGCGCGCGCGUGCA	AACGCGCGCGCGUCGGCGGGG	Cleavage	cDNA|3-oxoacyl-synthase, putative, expressed
									osa-miR1848	LOC_Os05g33310.1	1.5	925	945	CCUCGCCGGCGCGCGCGUGCA	GCCGCGCCCGCGCCGGCGAGG	Cleavage	cDNA|oxidoreductase, 2OG-Fe oxygenase family protein, putative, expressed
									osa-miR1858a	LOC_Os07g26000.1	1.5	657	677	GAGAGGAGGACGGAGUGGGGC	GCUCCACCCCGUCCUCCUCUC	Cleavage	cDNA|OsFBX235 - F-box domain containing protein, expressed
									osa-miR1858a	LOC_Os09g08580.1	1.5	318	338	GAGAGGAGGACGGAGUGGGGC	CUCCCACUUCGUCCUCCUCUA	Cleavage	cDNA|expressed protein
									osa-miR1858a	LOC_Os01g69250.2	1.5	1	21	GAGAGGAGGACGGAGUGGGGC	CUCCUCCUCCGUCCUCCUCUC	Cleavage	cDNA|mitochondrial import receptor subunit TOM20, putative, expressed
									osa-miR1858a	LOC_Os01g69250.4	1.5	1	21	GAGAGGAGGACGGAGUGGGGC	CUCCUCCUCCGUCCUCCUCUC	Cleavage	cDNA|mitochondrial import receptor subunit TOM20, putative, expressed
									osa-miR1858a	LOC_Os01g69250.1	1.5	1	21	GAGAGGAGGACGGAGUGGGGC	CUCCUCCUCCGUCCUCCUCUC	Cleavage	cDNA|mitochondrial import receptor subunit TOM20, putative, expressed
									osa-miR1858a	LOC_Os03g22780.1	1.5	715	735	GAGAGGAGGACGGAGUGGGGC	CGCGCACUUCGUCCUCCUCUC	Cleavage	cDNA|DVR, putative, expressed
									osa-miR1858b	LOC_Os07g26000.1	1.5	657	677	GAGAGGAGGACGGAGUGGGGC	GCUCCACCCCGUCCUCCUCUC	Cleavage	cDNA|OsFBX235 - F-box domain containing protein, expressed
									osa-miR1858b	LOC_Os09g08580.1	1.5	318	338	GAGAGGAGGACGGAGUGGGGC	CUCCCACUUCGUCCUCCUCUA	Cleavage	cDNA|expressed protein
									osa-miR1858b	LOC_Os01g69250.2	1.5	1	21	GAGAGGAGGACGGAGUGGGGC	CUCCUCCUCCGUCCUCCUCUC	Cleavage	cDNA|mitochondrial import receptor subunit TOM20, putative, expressed
									osa-miR1858b	LOC_Os01g69250.4	1.5	1	21	GAGAGGAGGACGGAGUGGGGC	CUCCUCCUCCGUCCUCCUCUC	Cleavage	cDNA|mitochondrial import receptor subunit TOM20, putative, expressed
									osa-miR1858b	LOC_Os01g69250.1	1.5	1	21	GAGAGGAGGACGGAGUGGGGC	CUCCUCCUCCGUCCUCCUCUC	Cleavage	cDNA|mitochondrial import receptor subunit TOM20, putative, expressed
									osa-miR1858b	LOC_Os03g22780.1	1.5	715	735	GAGAGGAGGACGGAGUGGGGC	CGCGCACUUCGUCCUCCUCUC	Cleavage	cDNA|DVR, putative, expressed
									osa-miR1862d	LOC_Os02g39070.1	1.5	1001	1024	ACUAGGUUUGUUUAUUUUGGGACG	CAUCGUAAAAUAAAUAAACUUAGU	Cleavage	cDNA|vesicle transport protein GOT1B, putative, expressed
									osa-miR1862d	LOC_Os02g39070.2	1.5	1083	1106	ACUAGGUUUGUUUAUUUUGGGACG	CAUCGUAAAAUAAAUAAACUUAGU	Cleavage	cDNA|vesicle transport protein GOT1B, putative, expressed
									osa-miR1862f	LOC_Os07g09310.1	1.5	373	392	AUGAGGUUGGUUUAUUUUGG	CCAAAAUAAAUUAAUCUCAU	Cleavage	cDNA|thioredoxin, putative, expressed
									osa-miR1862f	LOC_Os07g09310.2	1.5	373	392	AUGAGGUUGGUUUAUUUUGG	CCAAAAUAAAUUAAUCUCAU	Cleavage	cDNA|thioredoxin, putative, expressed
									osa-miR1862g	LOC_Os07g09310.1	1.5	373	392	AUGAGGUUGGUUUAUUUUGG	CCAAAAUAAAUUAAUCUCAU	Cleavage	cDNA|thioredoxin, putative, expressed
									osa-miR1862g	LOC_Os07g09310.2	1.5	373	392	AUGAGGUUGGUUUAUUUUGG	CCAAAAUAAAUUAAUCUCAU	Cleavage	cDNA|thioredoxin, putative, expressed
									osa-miR1863a	LOC_Os06g38480.2	1.5	14	37	AGCUCUGAUACCAUGUUAGAUUAG	CACAAUUCACAUGGUAUCAGAGCU	Cleavage	cDNA|retrotransposon protein, putative, unclassified, expressed
									osa-miR1863a	LOC_Os06g38480.1	1.5	14	37	AGCUCUGAUACCAUGUUAGAUUAG	CACAAUUCACAUGGUAUCAGAGCU	Cleavage	cDNA|retrotransposon protein, putative, unclassified, expressed
									osa-miR1863b	LOC_Os05g50070.1	1.5	792	814	AGCUCUGAUACCAUGUUAACUGUU	CACA-UUGAAAUGGUAUCAGAGCU	Cleavage	cDNA|retrotransposon protein, putative, unclassified, expressed
									osa-miR1882e-3p	LOC_Os01g19920.1	1.5	8	31	GAAAUGAUCUUGGACGUAAUCUAG	GGAGUUUACCUCUAAGAUCAUUUC	Cleavage	cDNA|retrotransposon protein, putative, unclassified
									osa-miR2102-5p	LOC_Os08g22780.1	1.5	110	129	GGGCAAGCCGCCGCCGCCAC	GUGGCGGUGGUGGCUUGCCU	Cleavage	cDNA|retrotransposon protein, putative, Ty3-gypsy subclass, expressed
									osa-miR2102-5p	LOC_Os03g37460.1	1.5	65	84	GGGCAAGCCGCCGCCGCCAC	GCGGCGGCGGCGGCUUGCCU	Cleavage	cDNA|hypothetical protein
									osa-miR2102-5p	LOC_Os11g11090.1	1.5	122	141	GGGCAAGCCGCCGCCGCCAC	AUGGCGGCGGCGGCUUGGCC	Cleavage	cDNA|expressed protein
									osa-miR2104	LOC_Os10g27380.1	1.5	95	116	GCGGCGAGGGGAUGCGAGCGUG	CGCGCGCGCGUCCCCUCGCCGC	Cleavage	cDNA|expressed protein
									osa-miR2118f	LOC_Os01g12240.1	1.5	253	274	UUCCUGAUGCCUCCCAUUCCUA	GUUGCAUGGGAGGUAUCAGGAA	Cleavage	cDNA|hypothetical protein
									osa-miR2118j	LOC_Os01g12240.1	1.5	253	274	UUCCUGAUGCCUCCCAUUCCUA	GUUGCAUGGGAGGUAUCAGGAA	Cleavage	cDNA|hypothetical protein
									osa-miR2118m	LOC_Os01g12240.1	1.5	253	274	UUCCUGAUGCCUCCCAUUCCUA	GUUGCAUGGGAGGUAUCAGGAA	Cleavage	cDNA|hypothetical protein
									osa-miR2120	LOC_Os09g16995.1	1.5	2269	2292	AAAGAUCUUUAGUCCCGGUUGUUC	AAACAACCGGGACUAAAGAUCUAU	Cleavage	cDNA|transposon protein, putative, CACTA, En/Spm sub-class, expressed
									osa-miR2120	LOC_Os12g17280.1	1.5	343	366	AAAGAUCUUUAGUCCCGGUUGUUC	CAUCAACCGGGACUAAAGAUAUUU	Cleavage	cDNA|expressed protein
									osa-miR2120	LOC_Os10g05695.1	1.5	1333	1356	AAAGAUCUUUAGUCCCGGUUGUUC	CACCAACCGGGACUAAAGAUCAUU	Cleavage	cDNA|retrotransposon protein, putative, unclassified, expressed
									osa-miR2120	LOC_Os10g05695.1	1.5	2385	2408	AAAGAUCUUUAGUCCCGGUUGUUC	CUCCAACCGGGACUAAAGAUCCUU	Cleavage	cDNA|retrotransposon protein, putative, unclassified, expressed
									osa-miR2122	LOC_Os01g57190.1	1.5	215	236	UUUCAAAAAUAACCUUUUGUUC	CAACAGAAGGUUAUUUUUGGGA	Cleavage	cDNA|transposon protein, putative, unclassified, expressed
									osa-miR2122	LOC_Os12g39140.1	1.5	215	236	UUUCAAAAAUAACCUUUUGUUC	CAACAGAAGGUUAUUUUUGGGA	Cleavage	cDNA|transposon protein, putative, unclassified, expressed
									osa-miR2122	LOC_Os03g60830.1	1.5	215	236	UUUCAAAAAUAACCUUUUGUUC	CAACAGAAGGUUAUUUUUGGGA	Cleavage	cDNA|transposon protein, putative, unclassified, expressed
									osa-miR2122	LOC_Os03g61450.1	1.5	215	236	UUUCAAAAAUAACCUUUUGUUC	CAACAGAAGGUUAUUUUUGGGA	Cleavage	cDNA|transposon protein, putative, unclassified, expressed
									osa-miR2122	LOC_Os01g14290.1	1.5	215	236	UUUCAAAAAUAACCUUUUGUUC	CAACAGAAGGUUAUUUUUGGGA	Cleavage	cDNA|transposon protein, putative, unclassified
									osa-miR2122	LOC_Os12g02270.1	1.5	215	236	UUUCAAAAAUAACCUUUUGUUC	CAACAGAAGGUUAUUUUUGGGA	Cleavage	cDNA|transposon protein, putative, unclassified, expressed
									osa-miR2122	LOC_Os06g19950.1	1.5	215	236	UUUCAAAAAUAACCUUUUGUUC	CAACAGAAGGUUAUUUUUGGGA	Cleavage	cDNA|transposon protein, putative, unclassified, expressed
									osa-miR2122	LOC_Os06g09580.1	1.5	215	236	UUUCAAAAAUAACCUUUUGUUC	CAACAGAAGGUUAUUUUUGGGA	Cleavage	cDNA|transposon protein, putative, unclassified, expressed
									osa-miR2122	LOC_Os11g09120.1	1.5	215	236	UUUCAAAAAUAACCUUUUGUUC	CAACAGAAGGUUAUUUUUGGGA	Cleavage	cDNA|transposon protein, putative, unclassified, expressed
									osa-miR2122	LOC_Os03g16620.1	1.5	215	236	UUUCAAAAAUAACCUUUUGUUC	CAACAGAAGGUUAUUUUUGGGA	Cleavage	cDNA|transposon protein, putative, unclassified, expressed
									osa-miR2122	LOC_Os03g04290.1	1.5	215	236	UUUCAAAAAUAACCUUUUGUUC	CAACAGAAGGUUAUUUUUGGGA	Cleavage	cDNA|transposon protein, putative, unclassified, expressed
									osa-miR2122	LOC_Os04g31650.1	1.5	29	50	UUUCAAAAAUAACCUUUUGUUC	CAACAGAAGGUUAUUUUUGGGA	Cleavage	cDNA|transposon protein, putative, unclassified, expressed
									osa-miR2122	LOC_Os07g29650.1	1.5	215	236	UUUCAAAAAUAACCUUUUGUUC	CAACAGAAGGUUAUUUUUGGGA	Cleavage	cDNA|transposon protein, putative, unclassified, expressed
									osa-miR2122	LOC_Os09g37630.1	1.5	215	236	UUUCAAAAAUAACCUUUUGUUC	CAACAGAAGGUUAUUUUUGGGA	Cleavage	cDNA|transposon protein, putative, unclassified, expressed
									osa-miR2122	LOC_Os01g15650.1	1.5	215	236	UUUCAAAAAUAACCUUUUGUUC	CAACAGAAGGUUAUUUUUGGGA	Cleavage	cDNA|transposon protein, putative, unclassified, expressed
									osa-miR2122	LOC_Os08g41130.1	1.5	215	236	UUUCAAAAAUAACCUUUUGUUC	CAACAGAAGGUUAUUUUUGGGA	Cleavage	cDNA|transposon protein, putative, unclassified, expressed
									osa-miR2122	LOC_Os06g19230.1	1.5	215	236	UUUCAAAAAUAACCUUUUGUUC	CAACAGAAGGUUAUUUUUGGGA	Cleavage	cDNA|transposon protein, putative, unclassified, expressed
									osa-miR2122	LOC_Os12g39570.1	1.5	215	236	UUUCAAAAAUAACCUUUUGUUC	CAACAGAAGGUUAUUUUUGGGA	Cleavage	cDNA|transposon protein, putative, unclassified, expressed
									osa-miR2122	LOC_Os12g31700.1	1.5	215	236	UUUCAAAAAUAACCUUUUGUUC	CAACAGAAGGUUAUUUUUGGGA	Cleavage	cDNA|transposon protein, putative, unclassified, expressed
									osa-miR2122	LOC_Os12g04670.1	1.5	215	236	UUUCAAAAAUAACCUUUUGUUC	CAACAGAAGGUUAUUUUUGGGA	Cleavage	cDNA|transposon protein, putative, unclassified, expressed
									osa-miR2122	LOC_Os02g29330.1	1.5	215	236	UUUCAAAAAUAACCUUUUGUUC	CAACAGAAGGUUAUUUUUGGGA	Cleavage	cDNA|transposon protein, putative, unclassified, expressed
									osa-miR2122	LOC_Os09g28330.1	1.5	215	236	UUUCAAAAAUAACCUUUUGUUC	CAACAGAAGGUUAUUUUUGGGA	Cleavage	cDNA|transposon protein, putative, unclassified, expressed
									osa-miR2122	LOC_Os01g36910.1	1.5	215	236	UUUCAAAAAUAACCUUUUGUUC	CAACAGAAGGUUAUUUUUGGGA	Cleavage	cDNA|transposon protein, putative, unclassified, expressed
									osa-miR2122	LOC_Os01g49950.1	1.5	215	236	UUUCAAAAAUAACCUUUUGUUC	CAACAGAAGGUUAUUUUUGGGA	Cleavage	cDNA|transposon protein, putative, unclassified, expressed
									osa-miR2122	LOC_Os02g27510.1	1.5	215	236	UUUCAAAAAUAACCUUUUGUUC	CAACAGAAGGUUAUUUUUGGGA	Cleavage	cDNA|transposon protein, putative, unclassified, expressed
									osa-miR2122	LOC_Os05g40760.1	1.5	215	236	UUUCAAAAAUAACCUUUUGUUC	CAACAGAAGGUUAUUUUUGGGA	Cleavage	cDNA|transposon protein, putative, unclassified, expressed
									osa-miR2122	LOC_Os03g11830.1	1.5	215	236	UUUCAAAAAUAACCUUUUGUUC	CAACAGAAGGUUAUUUUUGGGA	Cleavage	cDNA|transposon protein, putative, unclassified, expressed
									osa-miR2122	LOC_Os06g12900.1	1.5	215	236	UUUCAAAAAUAACCUUUUGUUC	CAACAGAAGGUUAUUUUUGGGA	Cleavage	cDNA|transposon protein, putative, unclassified, expressed
									osa-miR2122	LOC_Os01g64420.1	1.5	215	236	UUUCAAAAAUAACCUUUUGUUC	CAACAGAAGGUUAUUUUUGGGA	Cleavage	cDNA|transposon protein, putative, unclassified, expressed
									osa-miR2122	LOC_Os07g42980.1	1.5	215	236	UUUCAAAAAUAACCUUUUGUUC	CAACAGAAGGUUAUUUUUGGGA	Cleavage	cDNA|transposon protein, putative, unclassified, expressed
									osa-miR2122	LOC_Os02g46230.1	1.5	215	236	UUUCAAAAAUAACCUUUUGUUC	CAACAGAAGGUUAUUUUUGGGA	Cleavage	cDNA|transposon protein, putative, unclassified, expressed
									osa-miR2122	LOC_Os01g15620.1	1.5	29	50	UUUCAAAAAUAACCUUUUGUUC	CAACAGAAGGUUAUUUUUGGGA	Cleavage	cDNA|transposon protein, putative, unclassified, expressed
									osa-miR2122	LOC_Os02g01620.1	1.5	215	236	UUUCAAAAAUAACCUUUUGUUC	CAACAGAAGGUUAUUUUUGGGA	Cleavage	cDNA|transposon protein, putative, unclassified, expressed
									osa-miR2122	LOC_Os02g09110.1	1.5	215	236	UUUCAAAAAUAACCUUUUGUUC	CAACAGAAGGUUAUUUUUGGGA	Cleavage	cDNA|transposon protein, putative, unclassified, expressed
									osa-miR2122	LOC_Os01g09490.1	1.5	215	236	UUUCAAAAAUAACCUUUUGUUC	CAACAGAAGGUUAUUUUUGGGA	Cleavage	cDNA|transposon protein, putative, unclassified, expressed
									osa-miR2122	LOC_Os02g52050.1	1.5	215	236	UUUCAAAAAUAACCUUUUGUUC	AAACAGAAGGUUAUUUUUGGGA	Cleavage	cDNA|transposon protein, putative, unclassified, expressed
									osa-miR2122	LOC_Os09g37820.1	1.5	215	236	UUUCAAAAAUAACCUUUUGUUC	CAACAGAAGGUUAUUUUUGGGA	Cleavage	cDNA|transposon protein, putative, unclassified, expressed
									osa-miR2122	LOC_Os07g32580.1	1.5	215	236	UUUCAAAAAUAACCUUUUGUUC	CAACAGAAGGUUAUUUUUGGGA	Cleavage	cDNA|transposon protein, putative, unclassified, expressed
									osa-miR2122	LOC_Os01g43970.1	1.5	215	236	UUUCAAAAAUAACCUUUUGUUC	CAACAGAAGGUUAUUUUUGGGA	Cleavage	cDNA|transposon protein, putative, unclassified, expressed
									osa-miR2122	LOC_Os05g47710.1	1.5	215	236	UUUCAAAAAUAACCUUUUGUUC	CAACAGAAGGUUAUUUUUGGGA	Cleavage	cDNA|transposon protein, putative, unclassified, expressed
									osa-miR2122	LOC_Os12g22150.1	1.5	215	236	UUUCAAAAAUAACCUUUUGUUC	CAACAGAAGGUUAUUUUUGGGA	Cleavage	cDNA|transposon protein, putative, unclassified, expressed
									osa-miR2122	LOC_Os02g58240.1	1.5	215	236	UUUCAAAAAUAACCUUUUGUUC	CAACAGAAGGUUAUUUUUGGGA	Cleavage	cDNA|transposon protein, putative, unclassified, expressed
									osa-miR2122	LOC_Os10g28650.1	1.5	29	50	UUUCAAAAAUAACCUUUUGUUC	CAACAGAAGGUUAUUUUUGGGA	Cleavage	cDNA|transposon protein, putative, unclassified, expressed
									osa-miR2122	LOC_Os07g33700.1	1.5	215	236	UUUCAAAAAUAACCUUUUGUUC	CAACAGAAGGUUAUUUUUGGGA	Cleavage	cDNA|transposon protein, putative, unclassified, expressed
									osa-miR2122	LOC_Os11g06280.1	1.5	215	236	UUUCAAAAAUAACCUUUUGUUC	CAACAGAAGGUUAUUUUUGGGA	Cleavage	cDNA|transposon protein, putative, unclassified, expressed
									osa-miR2122	LOC_Os02g18360.1	1.5	215	236	UUUCAAAAAUAACCUUUUGUUC	CAACAGAAGGUUAUUUUUGGGA	Cleavage	cDNA|transposon protein, putative, unclassified, expressed
									osa-miR2122	LOC_Os07g13390.1	1.5	215	236	UUUCAAAAAUAACCUUUUGUUC	CAACAGAAGGUUAUUUUUGGGA	Cleavage	cDNA|transposon protein, putative, unclassified, expressed
									osa-miR2122	LOC_Os03g28204.1	1.5	215	236	UUUCAAAAAUAACCUUUUGUUC	CAACAGAAGGUUAUUUUUGGGA	Cleavage	cDNA|transposon protein, putative, unclassified, expressed
									osa-miR2122	LOC_Os02g03350.1	1.5	215	236	UUUCAAAAAUAACCUUUUGUUC	CAACAGAAGGUUAUUUUUGGGA	Cleavage	cDNA|transposon protein, putative, unclassified, expressed
									osa-miR2122	LOC_Os06g34820.1	1.5	215	236	UUUCAAAAAUAACCUUUUGUUC	CAACAGAAGGUUAUUUUUGGGA	Cleavage	cDNA|transposon protein, putative, unclassified, expressed
									osa-miR2122	LOC_Os01g60880.1	1.5	215	236	UUUCAAAAAUAACCUUUUGUUC	CAACAGAAGGUUAUUUUUGGGA	Cleavage	cDNA|transposon protein, putative, unclassified, expressed
									osa-miR2122	LOC_Os11g35880.1	1.5	29	50	UUUCAAAAAUAACCUUUUGUUC	CAACAGAAGGUUAUUUUUGGGA	Cleavage	cDNA|transposon protein, putative, unclassified, expressed
									osa-miR2122	LOC_Os04g51470.1	1.5	215	236	UUUCAAAAAUAACCUUUUGUUC	CAACAGAAGGUUAUUUUUGGGA	Cleavage	cDNA|transposon protein, putative, unclassified, expressed
									osa-miR2122	LOC_Os04g47800.1	1.5	215	236	UUUCAAAAAUAACCUUUUGUUC	CAACAGAAGGUUAUUUUUGGGA	Cleavage	cDNA|transposon protein, putative, unclassified, expressed
									osa-miR2122	LOC_Os03g19050.1	1.5	215	236	UUUCAAAAAUAACCUUUUGUUC	CAACAGAAGGUUAUUUUUGGGA	Cleavage	cDNA|transposon protein, putative, unclassified, expressed
									osa-miR2122	LOC_Os10g18160.1	1.5	215	236	UUUCAAAAAUAACCUUUUGUUC	CAACAGAAGGUUAUUUUUGGGA	Cleavage	cDNA|transposon protein, putative, unclassified, expressed
									osa-miR2122	LOC_Os10g36380.1	1.5	215	236	UUUCAAAAAUAACCUUUUGUUC	CAACAGAAGGUUAUUUUUGGGA	Cleavage	cDNA|transposon protein, putative, unclassified, expressed
									osa-miR2122	LOC_Os02g10910.1	1.5	215	236	UUUCAAAAAUAACCUUUUGUUC	CAACAGAAGGUUAUUUUUGGGA	Cleavage	cDNA|transposon protein, putative, unclassified, expressed
									osa-miR2122	LOC_Os04g18390.1	1.5	215	236	UUUCAAAAAUAACCUUUUGUUC	CAACAGAAGGUUAUUUUUGGGA	Cleavage	cDNA|transposon protein, putative, unclassified, expressed
									osa-miR2122	LOC_Os07g12860.1	1.5	215	236	UUUCAAAAAUAACCUUUUGUUC	CAACAGAAGGUUAUUUUUGGGA	Cleavage	cDNA|transposon protein, putative, unclassified, expressed
									osa-miR2122	LOC_Os07g28130.1	1.5	215	236	UUUCAAAAAUAACCUUUUGUUC	CAACAGAAGGUUAUUUUUGGGA	Cleavage	cDNA|transposon protein, putative, unclassified, expressed
									osa-miR2122	LOC_Os06g41900.1	1.5	215	236	UUUCAAAAAUAACCUUUUGUUC	CAACAGAAGGUUAUUUUUGGGA	Cleavage	cDNA|transposon protein, putative, unclassified, expressed
									osa-miR2122	LOC_Os07g34310.1	1.5	215	236	UUUCAAAAAUAACCUUUUGUUC	CAACAGAAGGUUAUUUUUGGGA	Cleavage	cDNA|transposon protein, putative, unclassified, expressed
									osa-miR2122	LOC_Os05g50740.1	1.5	215	236	UUUCAAAAAUAACCUUUUGUUC	CAACAGAAGGUUAUUUUUGGGA	Cleavage	cDNA|transposon protein, putative, unclassified, expressed
									osa-miR2122	LOC_Os02g11730.1	1.5	215	236	UUUCAAAAAUAACCUUUUGUUC	CAACAGAAGGUUAUUUUUGGGA	Cleavage	cDNA|transposon protein, putative, unclassified, expressed
									osa-miR2122	LOC_Os10g22164.1	1.5	215	236	UUUCAAAAAUAACCUUUUGUUC	CAACAGAAGGUUAUUUUUGGGA	Cleavage	cDNA|transposon protein, putative, unclassified, expressed
									osa-miR2122	LOC_Os10g33220.1	1.5	215	236	UUUCAAAAAUAACCUUUUGUUC	CAACAGAAGGUUAUUUUUGGGA	Cleavage	cDNA|transposon protein, putative, unclassified, expressed
									osa-miR2122	LOC_Os01g12040.1	1.5	215	236	UUUCAAAAAUAACCUUUUGUUC	CAACAGAAGGUUAUUUUUGGGA	Cleavage	cDNA|transposon protein, putative, unclassified, expressed
									osa-miR2122	LOC_Os04g30990.1	1.5	215	236	UUUCAAAAAUAACCUUUUGUUC	CAACAGAAGGUUAUUUUUGGGA	Cleavage	cDNA|transposon protein, putative, unclassified, expressed
									osa-miR2122	LOC_Os11g44410.1	1.5	215	236	UUUCAAAAAUAACCUUUUGUUC	CAACAGAAGGUUAUUUUUGGGA	Cleavage	cDNA|transposon protein, putative, unclassified, expressed
									osa-miR2122	LOC_Os10g02660.1	1.5	215	236	UUUCAAAAAUAACCUUUUGUUC	CAACAGAAGGUUAUUUUUGGGA	Cleavage	cDNA|transposon protein, putative, unclassified, expressed
									osa-miR2122	LOC_Os07g35040.1	1.5	215	236	UUUCAAAAAUAACCUUUUGUUC	CAACAGAAGGUUAUUUUUGGGA	Cleavage	cDNA|transposon protein, putative, unclassified, expressed
									osa-miR2122	LOC_Os10g24790.1	1.5	215	236	UUUCAAAAAUAACCUUUUGUUC	CAACAGAAGGUUAUUUUUGGGA	Cleavage	cDNA|transposon protein, putative, unclassified, expressed
									osa-miR2122	LOC_Os11g25520.1	1.5	215	236	UUUCAAAAAUAACCUUUUGUUC	CAACAGAAGGUUAUUUUUGGGA	Cleavage	cDNA|transposon protein, putative, unclassified, expressed
									osa-miR2122	LOC_Os01g47790.1	1.5	215	236	UUUCAAAAAUAACCUUUUGUUC	CAACAGAAGGUUAUUUUUGGGA	Cleavage	cDNA|transposon protein, putative, unclassified, expressed
									osa-miR2122	LOC_Os10g32560.1	1.5	215	236	UUUCAAAAAUAACCUUUUGUUC	CAACAGAAGGUUAUUUUUGGGA	Cleavage	cDNA|transposon protein, putative, unclassified, expressed
									osa-miR2122	LOC_Os01g21840.1	1.5	29	50	UUUCAAAAAUAACCUUUUGUUC	CAACAGAAGGUUAUUUUUGGGA	Cleavage	cDNA|transposon protein, putative, unclassified, expressed
									osa-miR2122	LOC_Os07g17240.1	1.5	215	236	UUUCAAAAAUAACCUUUUGUUC	CAACAGAAGGUUAUUUUUGGGA	Cleavage	cDNA|transposon protein, putative, unclassified, expressed
									osa-miR2122	LOC_Os02g09950.1	1.5	215	236	UUUCAAAAAUAACCUUUUGUUC	CAACAGAAGGUUAUUUUUGGGA	Cleavage	cDNA|transposon protein, putative, unclassified, expressed
									osa-miR2122	LOC_Os02g41870.1	1.5	215	236	UUUCAAAAAUAACCUUUUGUUC	CAACAGAAGGUUAUUUUUGGGA	Cleavage	cDNA|transposon protein, putative, unclassified, expressed
									osa-miR2122	LOC_Os10g36990.1	1.5	215	236	UUUCAAAAAUAACCUUUUGUUC	CAACAGAAGGUUAUUUUUGGGA	Cleavage	cDNA|transposon protein, putative, unclassified, expressed
									osa-miR2122	LOC_Os03g13780.1	1.5	215	236	UUUCAAAAAUAACCUUUUGUUC	CAACAGAAGGUUAUUUUUGGGA	Cleavage	cDNA|transposon protein, putative, unclassified, expressed
									osa-miR2122	LOC_Os01g68220.1	1.5	215	236	UUUCAAAAAUAACCUUUUGUUC	CAACAGAAGGUUAUUUUUGGGA	Cleavage	cDNA|transposon protein, putative, unclassified, expressed
									osa-miR2122	LOC_Os06g44480.1	1.5	215	236	UUUCAAAAAUAACCUUUUGUUC	CAACAGAAGGUUAUUUUUGGGA	Cleavage	cDNA|transposon protein, putative, unclassified, expressed
									osa-miR2122	LOC_Os01g27250.1	1.5	215	236	UUUCAAAAAUAACCUUUUGUUC	CAACAGAAGGUUAUUUUUGGGA	Cleavage	cDNA|transposon protein, putative, unclassified, expressed
									osa-miR2122	LOC_Os12g16500.1	1.5	215	236	UUUCAAAAAUAACCUUUUGUUC	CAACAGAAGGUUAUUUUUGGGA	Cleavage	cDNA|transposon protein, putative, unclassified, expressed
									osa-miR2122	LOC_Os03g13710.1	1.5	215	236	UUUCAAAAAUAACCUUUUGUUC	CAACAGAAGGUUAUUUUUGGGA	Cleavage	cDNA|transposon protein, putative, unclassified, expressed
									osa-miR2122	LOC_Os12g24555.1	1.5	215	236	UUUCAAAAAUAACCUUUUGUUC	CAACAGAAGGUUAUUUUUGGGA	Cleavage	cDNA|transposon protein, putative, unclassified, expressed
									osa-miR2122	LOC_Os01g54220.1	1.5	215	236	UUUCAAAAAUAACCUUUUGUUC	CAACAGAAGGUUAUUUUUGGGA	Cleavage	cDNA|transposon protein, putative, unclassified, expressed
									osa-miR2122	LOC_Os01g35220.1	1.5	215	236	UUUCAAAAAUAACCUUUUGUUC	CAACAGAAGGUUAUUUUUGGGA	Cleavage	cDNA|transposon protein, putative, unclassified, expressed
									osa-miR2122	LOC_Os01g18480.1	1.5	215	236	UUUCAAAAAUAACCUUUUGUUC	CAACAGAAGGUUAUUUUUGGGA	Cleavage	cDNA|transposon protein, putative, unclassified, expressed
									osa-miR2122	LOC_Os01g51180.1	1.5	215	236	UUUCAAAAAUAACCUUUUGUUC	CAACAGAAGGUUAUUUUUGGGA	Cleavage	cDNA|transposon protein, putative, unclassified, expressed
									osa-miR2122	LOC_Os08g05450.1	1.5	215	236	UUUCAAAAAUAACCUUUUGUUC	CAACAGAAGGUUAUUUUUGGGA	Cleavage	cDNA|transposon protein, putative, unclassified, expressed
									osa-miR2122	LOC_Os05g45970.1	1.5	215	236	UUUCAAAAAUAACCUUUUGUUC	CAACAGAAGGUUAUUUUUGGGA	Cleavage	cDNA|transposon protein, putative, unclassified, expressed
									osa-miR2122	LOC_Os11g33080.1	1.5	215	236	UUUCAAAAAUAACCUUUUGUUC	CAACAGAAGGUUAUUUUUGGGA	Cleavage	cDNA|transposon protein, putative, unclassified, expressed
									osa-miR2122	LOC_Os01g61090.1	1.5	215	236	UUUCAAAAAUAACCUUUUGUUC	CAACAGAAGGUUAUUUUUGGGA	Cleavage	cDNA|transposon protein, putative, unclassified, expressed
									osa-miR2122	LOC_Os07g30230.1	1.5	215	236	UUUCAAAAAUAACCUUUUGUUC	CAACAGAAGGUUAUUUUUGGGA	Cleavage	cDNA|transposon protein, putative, unclassified, expressed
									osa-miR2122	LOC_Os06g06110.1	1.5	215	236	UUUCAAAAAUAACCUUUUGUUC	CAACAGAAGGUUAUUUUUGGGA	Cleavage	cDNA|transposon protein, putative, unclassified, expressed
									osa-miR2122	LOC_Os06g20210.1	1.5	215	236	UUUCAAAAAUAACCUUUUGUUC	CAACAGAAGGUUAUUUUUGGGA	Cleavage	cDNA|transposon protein, putative, unclassified, expressed
									osa-miR2122	LOC_Os07g05770.1	1.5	215	236	UUUCAAAAAUAACCUUUUGUUC	CAACAGAAGGUUAUUUUUGGGA	Cleavage	cDNA|transposon protein, putative, unclassified, expressed
									osa-miR2122	LOC_Os09g12420.1	1.5	215	236	UUUCAAAAAUAACCUUUUGUUC	CAACAGAAGGUUAUUUUUGGGA	Cleavage	cDNA|transposon protein, putative, unclassified, expressed
									osa-miR2122	LOC_Os09g38900.1	1.5	215	236	UUUCAAAAAUAACCUUUUGUUC	CAACAGAAGGUUAUUUUUGGGA	Cleavage	cDNA|transposon protein, putative, unclassified, expressed
									osa-miR2122	LOC_Os06g47990.1	1.5	215	236	UUUCAAAAAUAACCUUUUGUUC	CAGCAGAAGGUUAUUUUUGGGA	Cleavage	cDNA|transposon protein, putative, unclassified, expressed
									osa-miR2122	LOC_Os03g59225.1	1.5	950	971	UUUCAAAAAUAACCUUUUGUUC	GCGCCAAGGGUUAUUUUUGAAA	Cleavage	cDNA|expressed protein
									osa-miR2122	LOC_Os03g37180.1	1.5	2146	2167	UUUCAAAAAUAACCUUUUGUUC	UCCCUAAAGGUUAUUUUUGGAA	Cleavage	cDNA|retrotransposon protein, putative, Ty3-gypsy subclass, expressed
									osa-miR2275c	LOC_Os07g46730.1	1.5	232	254	AGAAUUGGAGGAAAACAAACUGA	UUGAUUUGUUUUCUUUCAAUUUU	Cleavage	cDNA|PPR repeat domain containing protein, putative, expressed
									osa-miR2275d	LOC_Os12g06480.2	1.5	703	724	CUUGUUUUUCUCCAAUAUCUCA	CUUGAUGUUGGAGAGAAAUAAG	Cleavage	cDNA|PHD-finger family protein, expressed
									osa-miR2275d	LOC_Os12g06480.1	1.5	806	827	CUUGUUUUUCUCCAAUAUCUCA	CUUGAUGUUGGAGAGAAAUAAG	Cleavage	cDNA|PHD-finger family protein, expressed
									osa-miR2275d	LOC_Os08g33076.1	1.5	477	498	CUUGUUUUUCUCCAAUAUCUCA	UCUGGUAGUGGAGAAAAACAAG	Cleavage	cDNA|myrosinase precursor, putative, expressed
									osa-miR2864.2	LOC_Os12g41430.2	1.5	1482	1502	UUGUUUUGCAUUGUAUAGGUA	UACCUCUACAGUGCAAAACAA	Cleavage	cDNA|expressed protein
									osa-miR2864.2	LOC_Os12g41430.1	1.5	1482	1502	UUGUUUUGCAUUGUAUAGGUA	UACCUCUACAGUGCAAAACAA	Cleavage	cDNA|expressed protein
									osa-miR2872	LOC_Os01g33050.1	1.5	960	980	UGGGGUUCUACAAACCGAACU	AAUUCGAUUUGUAGAACUCCA	Cleavage	cDNA|ribosomal protein L24, putative, expressed
									osa-miR2872	LOC_Os01g33050.2	1.5	963	983	UGGGGUUCUACAAACCGAACU	AAUUCGAUUUGUAGAACUCCA	Cleavage	cDNA|ribosomal protein L24, putative, expressed
									osa-miR2873b	LOC_Os07g33480.4	1.5	870	890	UUGGACUUGAGAUUUGGUAUG	CAUACCAAAUGUCAAGUCCAA	Translation	cDNA|cytochrome P450 domain containing protein, expressed
									osa-miR2873c	LOC_Os01g73840.1	1.5	1066	1086	CAAAUGAAGUUGAGUUUGGAC	AUCCAAGCUUAACUUCGUUUG	Cleavage	cDNA|expressed protein
									osa-miR2873c	LOC_Os01g73840.2	1.5	1117	1137	CAAAUGAAGUUGAGUUUGGAC	AUCCAAGCUUAACUUCGUUUG	Cleavage	cDNA|expressed protein
									osa-miR2873c	LOC_Os12g06890.1	1.5	1031	1051	CAAAUGAAGUUGAGUUUGGAC	CUUCAAGCUCAGCUUCAUUUG	Cleavage	cDNA|OsNucAP3 - Putative Nucleoporin Autopeptidase homologue, expressed
									osa-miR2874	LOC_Os01g21450.1	1.5	2303	2326	AUGUGAACAGUGUCAAACAGUGUC	UGUCGUGUUUGAUACUGUUCAUGU	Cleavage	cDNA|expressed protein
									osa-miR2874	LOC_Os01g21450.2	1.5	3053	3076	AUGUGAACAGUGUCAAACAGUGUC	UGUCGUGUUUGAUACUGUUCAUGU	Cleavage	cDNA|expressed protein
									osa-miR2874	LOC_Os01g21450.3	1.5	3345	3368	AUGUGAACAGUGUCAAACAGUGUC	UGUCGUGUUUGAUACUGUUCAUGU	Cleavage	cDNA|expressed protein
									osa-miR2919	LOC_Os08g36250.1	1.5	167	185	AAGGGGGGGGGGGGAAAGA	UCUUUCCCUCCCCUCUCUU	Cleavage	cDNA|expressed protein
									osa-miR2919	LOC_Os03g22770.2	1.5	35	53	AAGGGGGGGGGGGGAAAGA	UCUUUCCCCCUCCCUUCUU	Cleavage	cDNA|CCT/B-box zinc finger protein, putative, expressed
									osa-miR2919	LOC_Os03g22770.1	1.5	35	53	AAGGGGGGGGGGGGAAAGA	UCUUUCCCCCUCCCUUCUU	Cleavage	cDNA|CCT/B-box zinc finger protein, putative, expressed
									osa-miR2919	LOC_Os06g45090.1	1.5	37	55	AAGGGGGGGGGGGGAAAGA	UCUUUCCCCCCUCUCUCUU	Cleavage	cDNA|expressed protein
									osa-miR2919	LOC_Os08g36250.1	1.5	167	185	AAGGGGGGGGGGGGAAAGA	UCUUUCCCUCCCCUCUCUU	Cleavage	cDNA|expressed protein
									osa-miR2919	LOC_Os03g22770.2	1.5	35	53	AAGGGGGGGGGGGGAAAGA	UCUUUCCCCCUCCCUUCUU	Cleavage	cDNA|CCT/B-box zinc finger protein, putative, expressed
									osa-miR2919	LOC_Os03g22770.1	1.5	35	53	AAGGGGGGGGGGGGAAAGA	UCUUUCCCCCUCCCUUCUU	Cleavage	cDNA|CCT/B-box zinc finger protein, putative, expressed
									osa-miR2919	LOC_Os06g45090.1	1.5	37	55	AAGGGGGGGGGGGGAAAGA	UCUUUCCCCCCUCUCUCUU	Cleavage	cDNA|expressed protein
									osa-miR2925	LOC_Os01g43320.1	1.5	547	565	UGGCGGCCGCGGGCUUCGU	GCGAGGCCCGCGGCCGCCG	Cleavage	cDNA|transmembrane amino acid transporter protein, putative, expressed
									osa-miR2925	LOC_Os02g56690.1	1.5	761	779	UGGCGGCCGCGGGCUUCGU	ACGACGCCCGCGGCCGCUA	Cleavage	cDNA|dihydroflavonol-4-reductase, putative, expressed
									osa-miR2926	LOC_Os05g34870.1	1.5	779	798	AGGUCGUCGACGUUGGUGCU	AGCACCGGCGUCGGCGACCU	Cleavage	cDNA|expressed protein
									osa-miR2927	LOC_Os05g37250.1	1.5	1055	1077	UGUCGUCGUCGAUGGAGCCCAUG	CAUGGGCUCCAUCAACGACGACA	Translation	cDNA|cytochrome P450, putative, expressed
									osa-miR2927	LOC_Os08g34790.1	1.5	1354	1376	UGUCGUCGUCGAUGGAGCCCAUG	CAUCGGCUUCGUCGACGACGACG	Cleavage	cDNA|AMP-binding domain containing protein, expressed
									osa-miR2927	LOC_Os02g08100.1	1.5	1351	1373	UGUCGUCGUCGAUGGAGCCCAUG	CAUCGGCUUCGUCGACGACGACG	Cleavage	cDNA|AMP-binding domain containing protein, expressed
									osa-miR2927	LOC_Os05g27950.1	1.5	162	184	UGUCGUCGUCGAUGGAGCCCAUG	GAUCGACUCCAUCGGCGACGACA	Cleavage	cDNA|DUF538 domain containing protein, putative, expressed
									osa-miR2927	LOC_Os11g25780.1	1.5	198	220	UGUCGUCGUCGAUGGAGCCCAUG	GCUCGGCUCCCUCGACGACGACA	Cleavage	cDNA|PB1 domain containing protein, expressed
									osa-miR2927	LOC_Os04g49550.1	1.5	173	195	UGUCGUCGUCGAUGGAGCCCAUG	GGGCGGCUCCAUCGCCGACGACA	Cleavage	cDNA|RING-H2 finger protein ATL2A, putative, expressed
									osa-miR2927	LOC_Os05g48020.1	1.5	117	139	UGUCGUCGUCGAUGGAGCCCAUG	CUACGGCUCCAUCGACGCCGACA	Cleavage	cDNA|SNARE domain containing protein, putative, expressed
									osa-miR2927	LOC_Os10g39110.1	1.5	5	27	UGUCGUCGUCGAUGGAGCCCAUG	CGGCGGCUUCAUCGACGACGGCG	Cleavage	cDNA|expansin precursor, putative, expressed
									osa-miR395b	LOC_Os03g53230.1	1.5	595	615	GUGAAGUGUUUGGGGGAACUC	GAGUUCCUCCAAGCACUUCAU	Cleavage	cDNA|bifunctional 3-phosphoadenosine 5-phosphosulfate synthetase, putative, expressed
									osa-miR395d	LOC_Os03g53230.1	1.5	595	615	GUGAAGUGUUUGGGGGAACUC	GAGUUCCUCCAAGCACUUCAU	Cleavage	cDNA|bifunctional 3-phosphoadenosine 5-phosphosulfate synthetase, putative, expressed
									osa-miR395e	LOC_Os03g53230.1	1.5	595	615	GUGAAGUGUUUGGGGGAACUC	GAGUUCCUCCAAGCACUUCAU	Cleavage	cDNA|bifunctional 3-phosphoadenosine 5-phosphosulfate synthetase, putative, expressed
									osa-miR395g	LOC_Os03g53230.1	1.5	595	615	GUGAAGUGUUUGGGGGAACUC	GAGUUCCUCCAAGCACUUCAU	Cleavage	cDNA|bifunctional 3-phosphoadenosine 5-phosphosulfate synthetase, putative, expressed
									osa-miR395h	LOC_Os03g53230.1	1.5	595	615	GUGAAGUGUUUGGGGGAACUC	GAGUUCCUCCAAGCACUUCAU	Cleavage	cDNA|bifunctional 3-phosphoadenosine 5-phosphosulfate synthetase, putative, expressed
									osa-miR395i	LOC_Os03g53230.1	1.5	595	615	GUGAAGUGUUUGGGGGAACUC	GAGUUCCUCCAAGCACUUCAU	Cleavage	cDNA|bifunctional 3-phosphoadenosine 5-phosphosulfate synthetase, putative, expressed
									osa-miR395j	LOC_Os03g53230.1	1.5	595	615	GUGAAGUGUUUGGGGGAACUC	GAGUUCCUCCAAGCACUUCAU	Cleavage	cDNA|bifunctional 3-phosphoadenosine 5-phosphosulfate synthetase, putative, expressed
									osa-miR395k	LOC_Os03g53230.1	1.5	595	615	GUGAAGUGUUUGGGGGAACUC	GAGUUCCUCCAAGCACUUCAU	Cleavage	cDNA|bifunctional 3-phosphoadenosine 5-phosphosulfate synthetase, putative, expressed
									osa-miR395l	LOC_Os03g53230.1	1.5	595	615	GUGAAGUGUUUGGGGGAACUC	GAGUUCCUCCAAGCACUUCAU	Cleavage	cDNA|bifunctional 3-phosphoadenosine 5-phosphosulfate synthetase, putative, expressed
									osa-miR395m	LOC_Os03g53230.1	1.5	595	615	GUGAAGUGUUUGGGGGAACUC	GAGUUCCUCCAAGCACUUCAU	Cleavage	cDNA|bifunctional 3-phosphoadenosine 5-phosphosulfate synthetase, putative, expressed
									osa-miR395n	LOC_Os03g53230.1	1.5	595	615	GUGAAGUGUUUGGGGGAACUC	GAGUUCCUCCAAGCACUUCAU	Cleavage	cDNA|bifunctional 3-phosphoadenosine 5-phosphosulfate synthetase, putative, expressed
									osa-miR395p	LOC_Os03g53230.1	1.5	595	615	GUGAAGUGUUUGGGGGAACUC	GAGUUCCUCCAAGCACUUCAU	Cleavage	cDNA|bifunctional 3-phosphoadenosine 5-phosphosulfate synthetase, putative, expressed
									osa-miR395q	LOC_Os03g53230.1	1.5	595	615	GUGAAGUGUUUGGGGGAACUC	GAGUUCCUCCAAGCACUUCAU	Cleavage	cDNA|bifunctional 3-phosphoadenosine 5-phosphosulfate synthetase, putative, expressed
									osa-miR395r	LOC_Os03g53230.1	1.5	595	615	GUGAAGUGUUUGGGGGAACUC	GAGUUCCUCCAAGCACUUCAU	Cleavage	cDNA|bifunctional 3-phosphoadenosine 5-phosphosulfate synthetase, putative, expressed
									osa-miR395s	LOC_Os03g53230.1	1.5	595	615	GUGAAGUGUUUGGGGGAACUC	GAGUUCCUCCAAGCACUUCAU	Cleavage	cDNA|bifunctional 3-phosphoadenosine 5-phosphosulfate synthetase, putative, expressed
									osa-miR395y	LOC_Os03g53230.1	1.5	595	615	GUGAAGUGUUUGGGGGAACUC	GAGUUCCUCCAAGCACUUCAU	Cleavage	cDNA|bifunctional 3-phosphoadenosine 5-phosphosulfate synthetase, putative, expressed
									osa-miR396a-5p	LOC_Os01g32750.1	1.5	579	599	UUCCACAGCUUUCUUGAACUG	CGGUUUAAGAGAGCUGUGGGA	Cleavage	cDNA|TATA binding protein-associated factor, putative, expressed
									osa-miR396b-5p	LOC_Os01g32750.1	1.5	579	599	UUCCACAGCUUUCUUGAACUG	CGGUUUAAGAGAGCUGUGGGA	Cleavage	cDNA|TATA binding protein-associated factor, putative, expressed
									osa-miR396c-5p	LOC_Os01g32750.1	1.5	579	599	UUCCACAGCUUUCUUGAACUU	CGGUUUAAGAGAGCUGUGGGA	Cleavage	cDNA|TATA binding protein-associated factor, putative, expressed
									osa-miR3979-3p	LOC_Os03g03450.2	1.5	25	44	CUUCGGGGGAGGAGAGAAGC	GCUUCUCUCUUCCUCUGAAG	Cleavage	cDNA|anthranilate phosphoribosyltransferase, chloroplast precursor, putative, expressed
									osa-miR3979-3p	LOC_Os03g03450.1	1.5	25	44	CUUCGGGGGAGGAGAGAAGC	GCUUCUCUCUUCCUCUGAAG	Cleavage	cDNA|anthranilate phosphoribosyltransferase, chloroplast precursor, putative, expressed
									osa-miR397a	LOC_Os05g38410.1	1.5	747	767	UCAUUGAGUGCAGCGUUGAUG	CAUCAACGCUGCACUCAACGA	Cleavage	cDNA|laccase precursor protein, putative, expressed
									osa-miR397a	LOC_Os05g38420.1	1.5	747	767	UCAUUGAGUGCAGCGUUGAUG	CAUCAACGCUGCACUCAACGA	Cleavage	cDNA|laccase precursor protein, putative, expressed
									osa-miR397a	LOC_Os11g48060.1	1.5	1180	1200	UCAUUGAGUGCAGCGUUGAUG	CAUCAACGCUGCACUGAAUGA	Cleavage	cDNA|laccase-22 precursor, putative, expressed
									osa-miR408-3p	LOC_Os06g15600.1	1.5	54	74	CUGCACUGCCUCUUCCCUGGC	GCCGGGGAAGAGGCAGUGCAA	Cleavage	cDNA|plastocyanin-like domain containing protein, putative, expressed
									osa-miR408-3p	LOC_Os01g03530.1	1.5	1551	1571	CUGCACUGCCUCUUCCCUGGC	GCCGAGGAAGAGGCAGUGCAG	Cleavage	cDNA|multicopper oxidase domain containing protein, expressed
									osa-miR408-3p	LOC_Os01g03530.2	1.5	1379	1399	CUGCACUGCCUCUUCCCUGGC	GCCGAGGAAGAGGCAGUGCAG	Cleavage	cDNA|multicopper oxidase domain containing protein, expressed
									osa-miR408-3p	LOC_Os03g50140.1	1.5	252	272	CUGCACUGCCUCUUCCCUGGC	CUCGGGGAAGAGGCAGUGCAA	Cleavage	cDNA|plastocyanin-like domain containing protein, putative, expressed
									osa-miR408-3p	LOC_Os02g49850.1	1.5	130	150	CUGCACUGCCUCUUCCCUGGC	CUCGGGGAAGAGGCAGUGCAU	Cleavage	cDNA|plastocyanin-like domain containing protein, putative, expressed
									osa-miR414	LOC_Os05g22750.1	1.5	1479	1499	UCAUCCUCAUCAUCAUCGUCC	GGACGAUGAUGAUGACGAUGA	Cleavage	cDNA|retrotransposon protein, putative, Ty3-gypsy subclass, expressed
									osa-miR414	LOC_Os10g16520.1	1.5	684	704	UCAUCCUCAUCAUCAUCGUCC	CGACGAUGAUGAUGAUGAUGA	Cleavage	cDNA|retrotransposon protein, putative, unclassified, expressed
									osa-miR414	LOC_Os01g21144.1	1.5	334	354	UCAUCCUCAUCAUCAUCGUCC	GGACGAUGAUGAUGAUGAUGA	Cleavage	cDNA|expressed protein
									osa-miR414	LOC_Os07g37900.1	1.5	6015	6035	UCAUCCUCAUCAUCAUCGUCC	UGAUGAUGGUGAUGAGGGUGA	Cleavage	cDNA|retrotransposon protein, putative, unclassified, expressed
									osa-miR414	LOC_Os06g43790.1	1.5	54	74	UCAUCCUCAUCAUCAUCGUCC	UGACGAUGAUGAUGAGGAUUA	Cleavage	cDNA|transcription initiation factor TFIID subunit 1, putative, expressed
									osa-miR414	LOC_Os11g19610.1	1.5	5016	5036	UCAUCCUCAUCAUCAUCGUCC	UGAUGAUGGUGAUGAGGGUGA	Cleavage	cDNA|retrotransposon protein, putative, unclassified, expressed
									osa-miR414	LOC_Os04g23470.1	1.5	4425	4445	UCAUCCUCAUCAUCAUCGUCC	CGACGAUGACGAUGAGGAUGA	Cleavage	cDNA|transposon protein, putative, unclassified, expressed
									osa-miR414	LOC_Os01g57110.1	1.5	1869	1889	UCAUCCUCAUCAUCAUCGUCC	UGACGAUGACGAUGAGGAUGA	Cleavage	cDNA|SNF2 family N-terminal domain containing protein, expressed
									osa-miR414	LOC_Os01g57110.2	1.5	1824	1844	UCAUCCUCAUCAUCAUCGUCC	UGACGAUGACGAUGAGGAUGA	Cleavage	cDNA|SNF2 family N-terminal domain containing protein, expressed
									osa-miR414	LOC_Os03g58590.1	1.5	1314	1334	UCAUCCUCAUCAUCAUCGUCC	UGACGAUGAUGAUGAUGAUGA	Cleavage	cDNA|expressed protein
									osa-miR414	LOC_Os03g59760.2	1.5	553	573	UCAUCCUCAUCAUCAUCGUCC	CGACGAUGACGAUGAGGAUGA	Cleavage	cDNA|RING finger protein 126, putative, expressed
									osa-miR414	LOC_Os03g59760.1	1.5	553	573	UCAUCCUCAUCAUCAUCGUCC	CGACGAUGACGAUGAGGAUGA	Cleavage	cDNA|RING finger protein 126, putative, expressed
									osa-miR414	LOC_Os08g09270.1	1.5	1828	1848	UCAUCCUCAUCAUCAUCGUCC	UGACGAUGAUGAUGAUGAUGA	Cleavage	cDNA|pentatricopeptide, putative, expressed
									osa-miR414	LOC_Os08g35860.1	1.5	1698	1718	UCAUCCUCAUCAUCAUCGUCC	UGAUGGUGAUGAUGGGGAUGA	Cleavage	cDNA|cytokinin dehydrogenase precursor, putative, expressed
									osa-miR414	LOC_Os02g03750.1	1.5	387	407	UCAUCCUCAUCAUCAUCGUCC	CGACGAUGAUGAUGAAGAUGA	Cleavage	cDNA|polygalacturonase, putative, expressed
									osa-miR414	LOC_Os11g09970.1	1.5	1407	1427	UCAUCCUCAUCAUCAUCGUCC	AGACGAUGAUGAUGAAGAUGA	Cleavage	cDNA|OsFBX411 - F-box domain containing protein, expressed
									osa-miR414	LOC_Os07g41694.1	1.5	875	895	UCAUCCUCAUCAUCAUCGUCC	AGACGAUGAUGAUGAGGAAGA	Cleavage	cDNA|acidic leucine-rich nuclear phosphoprotein 32-related protein 1, putative, expressed
									osa-miR414	LOC_Os06g50880.1	1.5	1443	1463	UCAUCCUCAUCAUCAUCGUCC	CGACGAUGAUGAUGAUGAUGA	Cleavage	cDNA|WD domain, G-beta repeat domain containing protein, expressed
									osa-miR414	LOC_Os03g32890.1	1.5	1365	1385	UCAUCCUCAUCAUCAUCGUCC	UGAUGAUGGUGAUGAGGGUGA	Cleavage	cDNA|retrotransposon protein, putative, unclassified, expressed
									osa-miR414	LOC_Os05g51830.1	1.5	553	573	UCAUCCUCAUCAUCAUCGUCC	UGACGAUGAUGAUGAUGAUGA	Cleavage	cDNA|ZOS5-12 - C2H2 zinc finger protein, expressed
									osa-miR414	LOC_Os05g51830.1	1.5	649	669	UCAUCCUCAUCAUCAUCGUCC	CAGCGAAGAUGAUGAGGAUGA	Cleavage	cDNA|ZOS5-12 - C2H2 zinc finger protein, expressed
									osa-miR414	LOC_Os07g46210.1	1.5	263	283	UCAUCCUCAUCAUCAUCGUCC	CGACGAUGAUGAUGAUGAUGA	Cleavage	cDNA|LTPL2 - Protease inhibitor/seed storage/LTP family protein precursor, expressed
									osa-miR414	LOC_Os06g05740.1	1.5	767	787	UCAUCCUCAUCAUCAUCGUCC	UGACGAUGAUGAUGAAGAUGA	Cleavage	cDNA|expressed protein
									osa-miR414	LOC_Os08g21940.1	1.5	825	845	UCAUCCUCAUCAUCAUCGUCC	CGACGAUGAUGAUGAUGAUGA	Cleavage	cDNA|retrotransposon protein, putative, unclassified, expressed
									osa-miR414	LOC_Os06g32400.1	1.5	1095	1115	UCAUCCUCAUCAUCAUCGUCC	UGAUGAUGGUGAUGAGGGUGA	Cleavage	cDNA|retrotransposon protein, putative, unclassified, expressed
									osa-miR414	LOC_Os04g35760.1	1.5	320	340	UCAUCCUCAUCAUCAUCGUCC	AGACGAUGAUGAUGAGGAGGA	Cleavage	cDNA|expressed protein
									osa-miR414	LOC_Os12g26310.1	1.5	5661	5681	UCAUCCUCAUCAUCAUCGUCC	UGGAGAUGAUGAUGAGGAUGA	Cleavage	cDNA|retrotransposon protein, putative, unclassified, expressed
									osa-miR414	LOC_Os11g42500.1	1.5	881	901	UCAUCCUCAUCAUCAUCGUCC	AGACGAUGACGAUGAGGAUGA	Cleavage	cDNA|dirigent, putative, expressed
									osa-miR414	LOC_Os03g15170.1	1.5	912	932	UCAUCCUCAUCAUCAUCGUCC	UGAUGAUGGUGAUGAGGGUGA	Cleavage	cDNA|retrotransposon protein, putative, unclassified, expressed
									osa-miR414	LOC_Os01g71230.1	1.5	199	219	UCAUCCUCAUCAUCAUCGUCC	UGACGAUGAUGACGAGGAUGA	Cleavage	cDNA|nascent polypeptide-associated complex subunit alpha-like protein 3, putative, expressed
									osa-miR414	LOC_Os01g71230.2	1.5	199	219	UCAUCCUCAUCAUCAUCGUCC	UGACGAUGAUGACGAGGAUGA	Cleavage	cDNA|nascent polypeptide-associated complex subunit alpha-like protein 3, putative, expressed
									osa-miR414	LOC_Os05g40940.1	1.5	453	473	UCAUCCUCAUCAUCAUCGUCC	UGACGAUGAUGAUGAUGAUGA	Cleavage	cDNA|retrotransposon protein, putative, unclassified, expressed
									osa-miR414	LOC_Os02g42040.1	1.5	3182	3202	UCAUCCUCAUCAUCAUCGUCC	UGAAGGUGAUGAUGAGGAUGA	Cleavage	cDNA|MIF4G domain containing protein, putative, expressed
									osa-miR414	LOC_Os03g37230.1	1.5	708	728	UCAUCCUCAUCAUCAUCGUCC	UGAUGAUGGUGAUGAGGGUGA	Cleavage	cDNA|retrotransposon protein, putative, unclassified
									osa-miR414	LOC_Os05g02420.1	1.5	330	350	UCAUCCUCAUCAUCAUCGUCC	AGGAGAUGAUGAUGAGGAUGA	Cleavage	cDNA|expressed protein
									osa-miR414	LOC_Os10g29370.1	1.5	156	176	UCAUCCUCAUCAUCAUCGUCC	UGACGAUGAUGAUGAUGAUGA	Cleavage	cDNA|snRNP protein, putative, expressed
									osa-miR414	LOC_Os02g16220.1	1.5	1650	1670	UCAUCCUCAUCAUCAUCGUCC	UUCUGAUGAUGAUGAGGAUGA	Cleavage	cDNA|expressed protein
									osa-miR414	LOC_Os05g02420.2	1.5	330	350	UCAUCCUCAUCAUCAUCGUCC	AGGAGAUGAUGAUGAGGAUGA	Cleavage	cDNA|expressed protein
									osa-miR414	LOC_Os06g13890.1	1.5	1233	1253	UCAUCCUCAUCAUCAUCGUCC	UUCUGAUGAUGAUGAGGAUGA	Cleavage	cDNA|expressed protein
									osa-miR414	LOC_Os06g13750.1	1.5	744	764	UCAUCCUCAUCAUCAUCGUCC	UUCUGAUGAUGAUGAGGAUGA	Cleavage	cDNA|expressed protein
									osa-miR414	LOC_Os12g20070.1	1.5	630	650	UCAUCCUCAUCAUCAUCGUCC	CGAUGACGAUGAUGAGGAUGA	Cleavage	cDNA|retrotransposon protein, putative, unclassified, expressed
									osa-miR414	LOC_Os01g47430.1	1.5	1244	1264	UCAUCCUCAUCAUCAUCGUCC	UAACGAUGAUGAUGAUGAUGA	Cleavage	cDNA|protein of unknown function DUF1296 domain containing protein, expressed
									osa-miR414	LOC_Os01g47430.2	1.5	1274	1294	UCAUCCUCAUCAUCAUCGUCC	UAACGAUGAUGAUGAUGAUGA	Cleavage	cDNA|protein of unknown function DUF1296 domain containing protein, expressed
									osa-miR414	LOC_Os06g04330.2	1.5	1260	1280	UCAUCCUCAUCAUCAUCGUCC	AUCUGAUGAUGAUGAGGAUGA	Cleavage	cDNA|expressed protein
									osa-miR414	LOC_Os06g04330.1	1.5	1260	1280	UCAUCCUCAUCAUCAUCGUCC	AUCUGAUGAUGAUGAGGAUGA	Cleavage	cDNA|expressed protein
									osa-miR414	LOC_Os09g01790.1	1.5	714	734	UCAUCCUCAUCAUCAUCGUCC	UUCUGAUGAUGAUGAGGAUGA	Cleavage	cDNA|expressed protein
									osa-miR415	LOC_Os05g02520.3	1.5	1247	1267	AACAGAACAGAAGCAGAGCAG	UUGCUCUGUUUUUGUUUUGUU	Cleavage	cDNA|cupin domain containing protein, expressed
									osa-miR415	LOC_Os05g02520.2	1.5	1443	1463	AACAGAACAGAAGCAGAGCAG	UUGCUCUGUUUUUGUUUUGUU	Cleavage	cDNA|cupin domain containing protein, expressed
									osa-miR415	LOC_Os05g02520.1	1.5	1574	1594	AACAGAACAGAAGCAGAGCAG	UUGCUCUGUUUUUGUUUUGUU	Cleavage	cDNA|cupin domain containing protein, expressed
									osa-miR415	LOC_Os02g01560.1	1.5	1167	1187	AACAGAACAGAAGCAGAGCAG	UCGCGUUGCUUCUGUUCUGUU	Cleavage	cDNA|40S ribosomal protein S4, putative, expressed
									osa-miR444b.1	LOC_Os02g17500.3	1.5	1925	1945	UGUUGUCUCAAGCUUGCUGCC	AUCAGCGAGUUUGAGGCAACA	Cleavage	cDNA|transporter family protein, putative, expressed
									osa-miR444b.1	LOC_Os02g17500.1	1.5	1761	1781	UGUUGUCUCAAGCUUGCUGCC	AUCAGCGAGUUUGAGGCAACA	Cleavage	cDNA|transporter family protein, putative, expressed
									osa-miR444b.1	LOC_Os02g17500.2	1.5	1549	1569	UGUUGUCUCAAGCUUGCUGCC	AUCAGCGAGUUUGAGGCAACA	Cleavage	cDNA|transporter family protein, putative, expressed
									osa-miR444b.2	LOC_Os08g06510.1	1.5	1371	1391	UGCAGUUGUUGUCUCAAGCUU	GAGCUUGAGGCAGCAGCUGCA	Cleavage	cDNA|zinc finger, C3HC4 type domain containing protein, expressed
									osa-miR444c.1	LOC_Os02g17500.3	1.5	1925	1945	UGUUGUCUCAAGCUUGCUGCC	AUCAGCGAGUUUGAGGCAACA	Cleavage	cDNA|transporter family protein, putative, expressed
									osa-miR444c.1	LOC_Os02g17500.1	1.5	1761	1781	UGUUGUCUCAAGCUUGCUGCC	AUCAGCGAGUUUGAGGCAACA	Cleavage	cDNA|transporter family protein, putative, expressed
									osa-miR444c.1	LOC_Os02g17500.2	1.5	1549	1569	UGUUGUCUCAAGCUUGCUGCC	AUCAGCGAGUUUGAGGCAACA	Cleavage	cDNA|transporter family protein, putative, expressed
									osa-miR444c.2	LOC_Os08g06510.1	1.5	1371	1391	UGCAGUUGUUGUCUCAAGCUU	GAGCUUGAGGCAGCAGCUGCA	Cleavage	cDNA|zinc finger, C3HC4 type domain containing protein, expressed
									osa-miR444f	LOC_Os02g36924.1	1.5	564	584	UGCAGUUGUUGCCUCAAGCUU	AAGCUUGAGACAACAACUGCA	Cleavage	cDNA|OsMADS27 - MADS-box family gene with MIKCc type-box, expressed
									osa-miR444f	LOC_Os04g38780.1	1.5	97	117	UGCAGUUGUUGCCUCAAGCUU	AAGCUUGAGACAACAACUGCA	Cleavage	cDNA|transcription factor, putative, expressed
									osa-miR444f	LOC_Os08g33479.1	1.5	154	174	UGCAGUUGUUGCCUCAAGCUU	AAGCUAGAGGCAGCAACUGCA	Cleavage	cDNA|expressed protein
									osa-miR444f	LOC_Os08g33479.2	1.5	476	496	UGCAGUUGUUGCCUCAAGCUU	AAGCUAGAGGCAGCAACUGCA	Cleavage	cDNA|expressed protein
									osa-miR444f	LOC_Os01g44990.1	1.5	1182	1202	UGCAGUUGUUGCCUCAAGCUU	GUGCUUGAGGCAACAACUGAA	Cleavage	cDNA|ercc6 protein, putative, expressed
									osa-miR5075	LOC_Os02g50320.2	1.5	267	287	UUCUCCGUCGCCGCCGUCCGC	GCGGACGGCGGCGGCGGGGAG	Cleavage	cDNA|ATMAP70 protein, putative, expressed
									osa-miR5075	LOC_Os02g50320.1	1.5	267	287	UUCUCCGUCGCCGCCGUCCGC	GCGGACGGCGGCGGCGGGGAG	Cleavage	cDNA|ATMAP70 protein, putative, expressed
									osa-miR5075	LOC_Os04g44640.1	1.5	1098	1118	UUCUCCGUCGCCGCCGUCCGC	CCGGACGGCGGCGAAGGAGAA	Cleavage	cDNA|ulp1 protease family, C-terminal catalytic domain containing protein, expressed
									osa-miR5075	LOC_Os06g44140.1	1.5	1514	1534	UUCUCCGUCGCCGCCGUCCGC	GCGGCCGGCGGCGACGGAGGA	Cleavage	cDNA|transmembrane 9 superfamily member, putative, expressed
									osa-miR5075	LOC_Os02g41460.1	1.5	470	490	UUCUCCGUCGCCGCCGUCCGC	GCGGGCGGCGGCGGCGGAGGA	Cleavage	cDNA|DUF640 domain containing protein, putative, expressed
									osa-miR5075	LOC_Os05g26600.1	1.5	696	716	UUCUCCGUCGCCGCCGUCCGC	GUCGACGGCGGCGACGGAGGA	Cleavage	cDNA|retrotransposon protein, putative, Ty3-gypsy subclass, expressed
									osa-miR5075	LOC_Os01g56200.1	1.5	705	725	UUCUCCGUCGCCGCCGUCCGC	GAGGGCGGCGGCGGCGGAGGA	Cleavage	cDNA|BTBA2 - Bric-a-Brac,Tramtrack, Broad Complex BTB domain with Ankyrin repeat region, expressed
									osa-miR5075	LOC_Os05g50830.1	1.5	1280	1300	UUCUCCGUCGCCGCCGUCCGC	CGAGGCGGCGGCGACGGAGAA	Cleavage	cDNA|protein kinase family protein, putative, expressed
									osa-miR5075	LOC_Os01g10440.1	1.5	631	651	UUCUCCGUCGCCGCCGUCCGC	AUGGGCGGCGGCGGCGGAGGA	Cleavage	cDNA|xylosyltransferase, putative, expressed
									osa-miR5075	LOC_Os05g50830.2	1.5	1280	1300	UUCUCCGUCGCCGCCGUCCGC	CGAGGCGGCGGCGACGGAGAA	Cleavage	cDNA|protein kinase family protein, putative, expressed
									osa-miR5075	LOC_Os01g22900.1	1.5	689	709	UUCUCCGUCGCCGCCGUCCGC	GGGGACGGUGGCGGCGGAGGA	Cleavage	cDNA|neutral/alkaline invertase, putative, expressed
									osa-miR5075	LOC_Os01g22900.3	1.5	677	697	UUCUCCGUCGCCGCCGUCCGC	GGGGACGGUGGCGGCGGAGGA	Cleavage	cDNA|neutral/alkaline invertase, putative, expressed
									osa-miR5075	LOC_Os04g19960.1	1.5	447	467	UUCUCCGUCGCCGCCGUCCGC	GUGGGUGGCGGCGGCGGAGAA	Cleavage	cDNA|retrotransposon protein, putative, unclassified, expressed
									osa-miR5075	LOC_Os01g17390.1	1.5	950	970	UUCUCCGUCGCCGCCGUCCGC	GAGGGCGGCGGCGGCGGAGGA	Cleavage	cDNA|OsFBX5 - F-box domain containing protein, expressed
									osa-miR5075	LOC_Os01g41050.1	1.5	1951	1971	UUCUCCGUCGCCGCCGUCCGC	GAGGAUGGCGGUGGCGGAGAA	Cleavage	cDNA|sulfate transporter, putative, expressed
									osa-miR5075	LOC_Os01g56200.2	1.5	705	725	UUCUCCGUCGCCGCCGUCCGC	GAGGGCGGCGGCGGCGGAGGA	Cleavage	cDNA|BTBA2 - Bric-a-Brac,Tramtrack, Broad Complex BTB domain with Ankyrin repeat region, expressed
									osa-miR5075	LOC_Os01g61590.1	1.5	310	330	UUCUCCGUCGCCGCCGUCCGC	GGGGGCGGCGGCGGCGGAGGA	Cleavage	cDNA|CAMK_CAMK_like.1 - CAMK includes calcium/calmodulin depedent protein kinases, expressed
									osa-miR5075	LOC_Os06g47620.1	1.5	1086	1106	UUCUCCGUCGCCGCCGUCCGC	GAGGGCGGCGGCGGCGGAGGA	Cleavage	cDNA|peptidase, putative, expressed
									osa-miR5075	LOC_Os01g41600.1	1.5	1566	1586	UUCUCCGUCGCCGCCGUCCGC	GGGGGCGGCGGCGGCGGAGAG	Cleavage	cDNA|Sad1 / UNC-like C-terminal domain containing protein, putative, expressed
									osa-miR5075	LOC_Os01g22900.2	1.5	677	697	UUCUCCGUCGCCGCCGUCCGC	GGGGACGGUGGCGGCGGAGGA	Cleavage	cDNA|neutral/alkaline invertase, putative, expressed
									osa-miR5144-3p	LOC_Os02g12790.1	1.5	1517	1537	UCUCCUCAGCAGCACAAGAAG	UGUUUUGUGUUGUUGAGGAGA	Cleavage	cDNA|GATA zinc finger domain containing protein, expressed
									osa-miR5145	LOC_Os05g43830.2	1.5	1689	1712	ACCUGUUUGGAUUCUUGAGGGCUA	ACACCUUCAAGAAUUCAGACAGGU	Cleavage	cDNA|hydrolase, alpha/beta fold family domain containing protein, expressed
									osa-miR5145	LOC_Os05g43830.1	1.5	1785	1808	ACCUGUUUGGAUUCUUGAGGGCUA	ACACCUUCAAGAAUUCAGACAGGU	Cleavage	cDNA|hydrolase, alpha/beta fold family domain containing protein, expressed
									osa-miR529b	LOC_Os01g69830.1	1.5	1148	1168	AGAAGAGAGAGAGUACAGCUU	CAACUGUGCUCUCUCUCUUCU	Cleavage	cDNA|OsSPL2 - SBP-box gene family member, expressed
									osa-miR5340	LOC_Os03g15780.2	1.5	135	157	UGAUGACGUGGAUGAAUUUCAAA	UCCGACAUUUAUCCACGUCAUCA	Cleavage	cDNA|anthranilate synthase component I-1, chloroplast precursor, putative, expressed
									osa-miR5340	LOC_Os03g15780.5	1.5	135	157	UGAUGACGUGGAUGAAUUUCAAA	UCCGACAUUUAUCCACGUCAUCA	Cleavage	cDNA|anthranilate synthase component I-1, chloroplast precursor, putative, expressed
									osa-miR5340	LOC_Os03g15780.1	1.5	135	157	UGAUGACGUGGAUGAAUUUCAAA	UCCGACAUUUAUCCACGUCAUCA	Cleavage	cDNA|anthranilate synthase component I-1, chloroplast precursor, putative, expressed
									osa-miR535-5p	LOC_Os03g14880.1	1.5	1734	1754	UGACAACGAGAGAGAGCACGC	UUAUGCUCUUUCUCGUUGUCA	Cleavage	cDNA|expressed protein
									osa-miR5490	LOC_Os08g36360.1	1.5	1778	1798	UUGGAUUUUUAUUUAGGACGG	AUGUCCUAAAUAAAAUUCCAA	Cleavage	cDNA|retrotransposon protein, putative, Ty1-copia subclass, expressed
									osa-miR5521	LOC_Os01g68560.1	1.5	1827	1847	AGUGGCUGCAUAUCUGAUGAG	UCCAUCAGAUAUGUAGCCACC	Cleavage	cDNA|OsMADS98 - MADS-box family gene with M-beta type-box, expressed
									osa-miR5537	LOC_Os11g05080.1	1.5	1085	1106	AAUGUUUGUAUGGAUCGUUUGU	ACAAAAGAUCCAUACAGACAUU	Cleavage	cDNA|powdery mildew resistant protein 5, putative, expressed
									osa-miR5537	LOC_Os08g29390.1	1.5	336	357	AAUGUUUGUAUGGAUCGUUUGU	UAUAACGAUCGAUACAAACAUU	Cleavage	cDNA|expressed protein
									osa-miR5542	LOC_Os06g20879.2	1.5	1355	1375	UUUGAGAAGGUAUCAUGAGAU	AUCUCAUAGUACCUUCUCAAA	Cleavage	cDNA|expressed protein
									osa-miR5542	LOC_Os06g20879.1	1.5	1355	1375	UUUGAGAAGGUAUCAUGAGAU	AUCUCAUAGUACCUUCUCAAA	Cleavage	cDNA|expressed protein
									osa-miR5542	LOC_Os12g03720.2	1.5	971	991	UUUGAGAAGGUAUCAUGAGAU	ACCUCAUGAUACCAUCUCAAA	Cleavage	cDNA|glucosamine--fructose-6-phosphate aminotransferase 1, putative, expressed
									osa-miR5799	LOC_Os10g32050.1	1.5	852	875	AAGACGAAUAAUCAAACGUUGGAC	GUUCAACGUUUGAUUAUUCAUCUU	Cleavage	cDNA|ankyrin repeat domain containing protein, expressed
									osa-miR5809	LOC_Os03g49126.1	1.5	106	125	UCGUCGCCGGCGACCACAGC	CCGGUGGUCGCCGGCGGCGA	Cleavage	cDNA|expressed protein
									osa-miR5809	LOC_Os02g39570.1	1.5	443	462	UCGUCGCCGGCGACCACAGC	UCUGUGUUCGUCGGCGACGA	Cleavage	cDNA|ACT domain containing protein, expressed
									osa-miR5809	LOC_Os02g39570.4	1.5	434	453	UCGUCGCCGGCGACCACAGC	UCUGUGUUCGUCGGCGACGA	Cleavage	cDNA|ACT domain containing protein, expressed
									osa-miR5809	LOC_Os02g39570.5	1.5	434	453	UCGUCGCCGGCGACCACAGC	UCUGUGUUCGUCGGCGACGA	Cleavage	cDNA|ACT domain containing protein, expressed
									osa-miR5809	LOC_Os07g26250.1	1.5	127	146	UCGUCGCCGGCGACCACAGC	CCUAUGGUCGCCGGCGGCGA	Cleavage	cDNA|retrotransposon protein, putative, unclassified, expressed
									osa-miR5816	LOC_Os11g41034.1	1.5	1067	1090	UAGGAGUGUUUGUAGGAGCGCCAC	GUGAAACUCCUACAAACGCUCCUA	Cleavage	cDNA|expressed protein
									osa-miR5817	LOC_Os03g64140.1	1.5	789	812	AUCGAAUUUGAAAGAAAAAGGUAU	AUAUCUUUUUCUUCCAAAUUCGAU	Translation	cDNA|expressed protein
									osa-miR5819	LOC_Os04g37440.1	1.5	402	422	AGGACGAGGGGAACGGCGGCG	AACCGCCGCUCCCCUCGUCCU	Cleavage	cDNA|expressed protein
									osa-miR5827	LOC_Os11g44310.1	1.5	1531	1551	UUUGUUGCAAUUUGGACUACC	GUAAGUCCAAGUUGCAACAAA	Cleavage	cDNA|calmodulin binding protein, putative, expressed
									osa-miR5830	LOC_Os06g01740.1	1.5	1364	1387	AUGUAGAUGAGGUGAUGUUACACA	AUAACAAUAUCACCUCAUCUACAA	Cleavage	cDNA|expressed protein
									osa-miR5831	LOC_Os01g61430.1	1.5	1033	1056	UAGUCAAACUUAGAAUAGUUGGAC	GUCAAACUACUUUAAGUUUGACUA	Cleavage	cDNA|HIT zinc finger domain containing protein, expressed
									osa-miR5831	LOC_Os02g19060.1	1.5	1022	1045	UAGUCAAACUUAGAAUAGUUGGAC	GUCAAACUAGUUUAAGUUUGACUA	Cleavage	cDNA|expressed protein
									osa-miR6248	LOC_Os04g46990.1	1.5	1566	1586	UAUUUGAGGAUGGAGGUAGUA	CACUCCCUCCAUUCUCAAAUA	Cleavage	cDNA|cis-zeatin O-glucosyltransferase, putative, expressed
									osa-miR6249a	LOC_Os02g19170.2	1.5	380	399	CGUGAAGAGCUCGCCGGCGG	UCGCCGACGAGCUCUUCAUG	Cleavage	cDNA|expressed protein
									osa-miR6249a	LOC_Os02g19170.3	1.5	366	385	CGUGAAGAGCUCGCCGGCGG	UCGCCGACGAGCUCUUCAUG	Cleavage	cDNA|expressed protein
									osa-miR6249a	LOC_Os02g19170.1	1.5	313	332	CGUGAAGAGCUCGCCGGCGG	UCGCCGACGAGCUCUUCAUG	Cleavage	cDNA|expressed protein
									osa-miR6249a	LOC_Os02g47510.1	1.5	1110	1129	CGUGAAGAGCUCGCCGGCGG	UCACCGGCGAGCUCUUCGCG	Cleavage	cDNA|9-cis-epoxycarotenoid dioxygenase 1, chloroplast precursor, putative, expressed
									osa-miR6249a	LOC_Os07g05940.1	1.5	955	974	CGUGAAGAGCUCGCCGGCGG	UCACCGGCGAGCUCUUCGCG	Cleavage	cDNA|9-cis-epoxycarotenoid dioxygenase 1, chloroplast precursor, putative, expressed
									osa-miR6249b	LOC_Os02g19170.2	1.5	380	399	CGUGAAGAGCUCGCCGGCGG	UCGCCGACGAGCUCUUCAUG	Cleavage	cDNA|expressed protein
									osa-miR6249b	LOC_Os02g19170.3	1.5	366	385	CGUGAAGAGCUCGCCGGCGG	UCGCCGACGAGCUCUUCAUG	Cleavage	cDNA|expressed protein
									osa-miR6249b	LOC_Os02g19170.1	1.5	313	332	CGUGAAGAGCUCGCCGGCGG	UCGCCGACGAGCUCUUCAUG	Cleavage	cDNA|expressed protein
									osa-miR6249b	LOC_Os02g47510.1	1.5	1110	1129	CGUGAAGAGCUCGCCGGCGG	UCACCGGCGAGCUCUUCGCG	Cleavage	cDNA|9-cis-epoxycarotenoid dioxygenase 1, chloroplast precursor, putative, expressed
									osa-miR6249b	LOC_Os07g05940.1	1.5	955	974	CGUGAAGAGCUCGCCGGCGG	UCACCGGCGAGCUCUUCGCG	Cleavage	cDNA|9-cis-epoxycarotenoid dioxygenase 1, chloroplast precursor, putative, expressed
									osa-miR812a	LOC_Os01g71060.1	1.5	1247	1268	GACGGACGGUUAAACGUUGGAC	GUCCAAUGUUUGACUGUCCGUC	Cleavage	cDNA|xylanase inhibitor, putative, expressed
									osa-miR812a	LOC_Os11g31690.1	1.5	1647	1668	GACGGACGGUUAAACGUUGGAC	GUCCAACGUUUGAUUGUCCGUC	Cleavage	cDNA|expressed protein
									osa-miR812a	LOC_Os11g31690.2	1.5	1648	1669	GACGGACGGUUAAACGUUGGAC	GUCCAACGUUUGAUUGUCCGUC	Cleavage	cDNA|expressed protein
									osa-miR812a	LOC_Os11g09260.1	1.5	898	919	GACGGACGGUUAAACGUUGGAC	GUCUAACGUUUGACCGUUCGUC	Cleavage	cDNA|expressed protein
									osa-miR812a	LOC_Os01g56720.1	1.5	769	790	GACGGACGGUUAAACGUUGGAC	GUUCAACGUUUGAUCGUUCGUC	Cleavage	cDNA|expressed protein
									osa-miR812a	LOC_Os09g02214.3	1.5	2965	2986	GACGGACGGUUAAACGUUGGAC	GCCCAAUGUUUGACCGUCUGUC	Cleavage	cDNA|Citrate transporter protein, putative, expressed
									osa-miR812b	LOC_Os01g71060.1	1.5	1247	1268	GACGGACGGUUAAACGUUGGAC	GUCCAAUGUUUGACUGUCCGUC	Cleavage	cDNA|xylanase inhibitor, putative, expressed
									osa-miR812b	LOC_Os11g31690.1	1.5	1647	1668	GACGGACGGUUAAACGUUGGAC	GUCCAACGUUUGAUUGUCCGUC	Cleavage	cDNA|expressed protein
									osa-miR812b	LOC_Os11g31690.2	1.5	1648	1669	GACGGACGGUUAAACGUUGGAC	GUCCAACGUUUGAUUGUCCGUC	Cleavage	cDNA|expressed protein
									osa-miR812b	LOC_Os11g09260.1	1.5	898	919	GACGGACGGUUAAACGUUGGAC	GUCUAACGUUUGACCGUUCGUC	Cleavage	cDNA|expressed protein
									osa-miR812b	LOC_Os01g56720.1	1.5	769	790	GACGGACGGUUAAACGUUGGAC	GUUCAACGUUUGAUCGUUCGUC	Cleavage	cDNA|expressed protein
									osa-miR812b	LOC_Os09g02214.3	1.5	2965	2986	GACGGACGGUUAAACGUUGGAC	GCCCAAUGUUUGACCGUCUGUC	Cleavage	cDNA|Citrate transporter protein, putative, expressed
									osa-miR812c	LOC_Os01g71060.1	1.5	1247	1268	GACGGACGGUUAAACGUUGGAC	GUCCAAUGUUUGACUGUCCGUC	Cleavage	cDNA|xylanase inhibitor, putative, expressed
									osa-miR812c	LOC_Os11g31690.1	1.5	1647	1668	GACGGACGGUUAAACGUUGGAC	GUCCAACGUUUGAUUGUCCGUC	Cleavage	cDNA|expressed protein
									osa-miR812c	LOC_Os11g31690.2	1.5	1648	1669	GACGGACGGUUAAACGUUGGAC	GUCCAACGUUUGAUUGUCCGUC	Cleavage	cDNA|expressed protein
									osa-miR812c	LOC_Os11g09260.1	1.5	898	919	GACGGACGGUUAAACGUUGGAC	GUCUAACGUUUGACCGUUCGUC	Cleavage	cDNA|expressed protein
									osa-miR812c	LOC_Os01g56720.1	1.5	769	790	GACGGACGGUUAAACGUUGGAC	GUUCAACGUUUGAUCGUUCGUC	Cleavage	cDNA|expressed protein
									osa-miR812c	LOC_Os09g02214.3	1.5	2965	2986	GACGGACGGUUAAACGUUGGAC	GCCCAAUGUUUGACCGUCUGUC	Cleavage	cDNA|Citrate transporter protein, putative, expressed
									osa-miR812d	LOC_Os01g71060.1	1.5	1247	1268	GACGGACGGUUAAACGUUGGAC	GUCCAAUGUUUGACUGUCCGUC	Cleavage	cDNA|xylanase inhibitor, putative, expressed
									osa-miR812d	LOC_Os11g31690.1	1.5	1647	1668	GACGGACGGUUAAACGUUGGAC	GUCCAACGUUUGAUUGUCCGUC	Cleavage	cDNA|expressed protein
									osa-miR812d	LOC_Os11g31690.2	1.5	1648	1669	GACGGACGGUUAAACGUUGGAC	GUCCAACGUUUGAUUGUCCGUC	Cleavage	cDNA|expressed protein
									osa-miR812d	LOC_Os11g09260.1	1.5	898	919	GACGGACGGUUAAACGUUGGAC	GUCUAACGUUUGACCGUUCGUC	Cleavage	cDNA|expressed protein
									osa-miR812d	LOC_Os01g56720.1	1.5	769	790	GACGGACGGUUAAACGUUGGAC	GUUCAACGUUUGAUCGUUCGUC	Cleavage	cDNA|expressed protein
									osa-miR812d	LOC_Os09g02214.3	1.5	2965	2986	GACGGACGGUUAAACGUUGGAC	GCCCAAUGUUUGACCGUCUGUC	Cleavage	cDNA|Citrate transporter protein, putative, expressed
									osa-miR812e	LOC_Os01g71060.1	1.5	1247	1268	GACGGACGGUUAAACGUUGGAC	GUCCAAUGUUUGACUGUCCGUC	Cleavage	cDNA|xylanase inhibitor, putative, expressed
									osa-miR812e	LOC_Os11g31690.1	1.5	1647	1668	GACGGACGGUUAAACGUUGGAC	GUCCAACGUUUGAUUGUCCGUC	Cleavage	cDNA|expressed protein
									osa-miR812e	LOC_Os11g31690.2	1.5	1648	1669	GACGGACGGUUAAACGUUGGAC	GUCCAACGUUUGAUUGUCCGUC	Cleavage	cDNA|expressed protein
									osa-miR812e	LOC_Os11g09260.1	1.5	898	919	GACGGACGGUUAAACGUUGGAC	GUCUAACGUUUGACCGUUCGUC	Cleavage	cDNA|expressed protein
									osa-miR812e	LOC_Os01g56720.1	1.5	769	790	GACGGACGGUUAAACGUUGGAC	GUUCAACGUUUGAUCGUUCGUC	Cleavage	cDNA|expressed protein
									osa-miR812e	LOC_Os09g02214.3	1.5	2965	2986	GACGGACGGUUAAACGUUGGAC	GCCCAAUGUUUGACCGUCUGUC	Cleavage	cDNA|Citrate transporter protein, putative, expressed
									osa-miR812f	LOC_Os02g07960.4	1.5	3481	3504	ACGGAUGAUUAAAGUUGGACACGG	CCGUGCCCAACUUUAAUCGUCCGU	Cleavage	cDNA|STRUBBELIG-RECEPTOR FAMILY 3 precursor, putative, expressed
									osa-miR812f	LOC_Os04g47140.1	1.5	655	678	ACGGAUGAUUAAAGUUGGACACGG	CAGCGCCCAACUUUGAUCAUCCGU	Cleavage	cDNA|expressed protein
									osa-miR812n-5p	LOC_Os04g54560.1	1.5	1580	1603	AAGUGCAGCCAUGAGUUUCCGUGC	GCACGGAAAAUCAUGGUUGCACUU	Cleavage	cDNA|transferase family protein, putative, expressed
									osa-miR812n-5p	LOC_Os03g20500.1	1.5	1564	1587	AAGUGCAGCCAUGAGUUUCCGUGC	GAAGUGAAACUUAUGGCUGUGCUU	Cleavage	cDNA|OsFBX82 - F-box domain containing protein, expressed
									osa-miR812r	LOC_Os11g09260.1	1.5	883	906	ACGUUAGACACGAAUUUCUACGGC	GCCAUGGAUAUUCGUGUCUAACGU	Cleavage	cDNA|expressed protein
									osa-miR812s	LOC_Os01g06740.1	1.5	1199	1222	AAGACGGACAAUCAAACGUUGGAC	GUCCAACGUUUGACUGUCCGUCUU	Translation	cDNA|ribosome inactivating protein, putative, expressed
									osa-miR812s	LOC_Os03g24730.1	1.5	89	112	AAGACGGACAAUCAAACGUUGGAC	GUCCAACGUUUGACUGUCCGUCUU	Translation	cDNA|expressed protein
									osa-miR812s	LOC_Os12g09570.2	1.5	2769	2792	AAGACGGACAAUCAAACGUUGGAC	UGCCAACGUUUGACUGUCCGUCUU	Translation	cDNA|GTP binding protein, putative, expressed
									osa-miR816	LOC_Os04g43290.3	1.5	1530	1549	GUGACAUAUUUUACUACAAC	GUUGUAUUAAAAUGUGUCAC	Cleavage	cDNA|ARPC2B, putative, expressed
									osa-miR816	LOC_Os04g43290.1	1.5	1610	1629	GUGACAUAUUUUACUACAAC	GUUGUAUUAAAAUGUGUCAC	Cleavage	cDNA|ARPC2B, putative, expressed
									osa-miR816	LOC_Os04g43290.4	1.5	1615	1634	GUGACAUAUUUUACUACAAC	GUUGUAUUAAAAUGUGUCAC	Cleavage	cDNA|ARPC2B, putative, expressed
									osa-miR816	LOC_Os04g43290.2	1.5	1738	1757	GUGACAUAUUUUACUACAAC	GUUGUAUUAAAAUGUGUCAC	Cleavage	cDNA|ARPC2B, putative, expressed
									osa-miR816	LOC_Os01g23630.1	1.5	570	589	GUGACAUAUUUUACUACAAC	AUUGUUGUAGAAUAUGUCAC	Cleavage	cDNA|transcription initiation factor IID, 18kD subunit family protein, expressed
									osa-miR816	LOC_Os12g02330.2	1.5	884	903	GUGACAUAUUUUACUACAAC	AUUGUACUAGAAUAUGUCAC	Cleavage	cDNA|LTPL13 - Protease inhibitor/seed storage/LTP family protein precursor, expressed
									osa-miR816	LOC_Os04g32540.2	1.5	1539	1558	GUGACAUAUUUUACUACAAC	AUUGUACUAGAAUAUGUCAC	Cleavage	cDNA|OsSCP24 - Putative Serine Carboxypeptidase homologue, expressed
									osa-miR816	LOC_Os04g32540.1	1.5	1813	1832	GUGACAUAUUUUACUACAAC	AUUGUACUAGAAUAUGUCAC	Cleavage	cDNA|OsSCP24 - Putative Serine Carboxypeptidase homologue, expressed
									osa-miR1319b	LOC_Os11g02379.1	2	1158	1181	CCUUUAAUAUAUUAUAGGUGUCGG	CCGGCACUUAUAAUAUAUUAUAGG	Cleavage	cDNA|LTPL6 - Protease inhibitor/seed storage/LTP family protein precursor, expressed
									osa-miR1319b	LOC_Os03g07380.1	2	730	753	CCUUUAAUAUAUUAUAGGUGUCGG	UGCAAAGCUGUAAUAUAUUGAAGG	Cleavage	cDNA|expressed protein
									osa-miR1320-5p	LOC_Os07g12330.3	2	14	34	UGGAACGGAGGAAUUUUAUAG	CACUAAAAUUCUUCCGUUUCA	Cleavage	cDNA|tryptophan/tyrosine permease family protein, putative, expressed
									osa-miR1320-5p	LOC_Os07g12330.2	2	14	34	UGGAACGGAGGAAUUUUAUAG	CACUAAAAUUCUUCCGUUUCA	Cleavage	cDNA|tryptophan/tyrosine permease family protein, putative, expressed
									osa-miR1320-5p	LOC_Os06g06760.3	2	46	66	UGGAACGGAGGAAUUUUAUAG	GGAGAAGAUUCCUCCGUUCCG	Cleavage	cDNA|protein kinase, putative, expressed
									osa-miR1320-5p	LOC_Os06g06760.2	2	46	66	UGGAACGGAGGAAUUUUAUAG	GGAGAAGAUUCCUCCGUUCCG	Cleavage	cDNA|protein kinase, putative, expressed
									osa-miR1320-5p	LOC_Os06g06760.1	2	46	66	UGGAACGGAGGAAUUUUAUAG	GGAGAAGAUUCCUCCGUUCCG	Cleavage	cDNA|protein kinase, putative, expressed
									osa-miR1435	LOC_Os04g44354.4	2	1370	1389	UUUCUUAAGUCAAACUUUUU	AAGAAGUUUGACUUAAAAAA	Cleavage	cDNA|UDP-glucoronosyl and UDP-glucosyl transferase domain containing protein, expressed
									osa-miR1437b-5p	LOC_Os06g13740.1	2	1563	1583	GGGAGGAAACAGUGCCUAGUG	CUUUAUGCACUGUUUCUUCCC	Cleavage	cDNA|transposon protein, putative, unclassified, expressed
									osa-miR1437b-5p	LOC_Os05g40720.1	2	343	363	GGGAGGAAACAGUGCCUAGUG	AUCAAGGCACUGUUUCUUUCC	Cleavage	cDNA|glycosyl transferase, family 8, putative, expressed
									osa-miR1438	LOC_Os02g05680.2	2	766	787	AGGGUAAUUUUAUCAUUUUUAA	UUAAGGAUGGUAAAAUUACUCU	Cleavage	cDNA|apoptosis-inducing factor 2, putative, expressed
									osa-miR1438	LOC_Os03g36970.1	2	563	584	AGGGUAAUUUUAUCAUUUUUAA	UGAAGAAUGAUAGAGUUAUCCU	Cleavage	cDNA|retrotransposon protein, putative, unclassified
									osa-miR1438	LOC_Os11g37920.1	2	1461	1482	AGGGUAAUUUUAUCAUUUUUAA	UCAAGGAUGGUAAAAUUAUCCU	Cleavage	cDNA|DJ-1 family protein, putative, expressed
									osa-miR1438	LOC_Os09g35690.1	2	571	592	AGGGUAAUUUUAUCAUUUUUAA	CAGAAAUUGAUAAGAUUGCCCU	Cleavage	cDNA|zinc RING finger protein, putative, expressed
									osa-miR1438	LOC_Os09g35690.2	2	581	602	AGGGUAAUUUUAUCAUUUUUAA	CAGAAAUUGAUAAGAUUGCCCU	Cleavage	cDNA|zinc RING finger protein, putative, expressed
									osa-miR1438	LOC_Os02g37230.1	2	1640	1661	AGGGUAAUUUUAUCAUUUUUAA	GCGAUAGUGAUAAAAUUACUCU	Cleavage	cDNA|expressed protein
									osa-miR1439	LOC_Os02g03750.1	2	1865	1885	UUUUGGAACGGAGUGAGUAUU	UAUACUCACUCCGUUUCACAA	Cleavage	cDNA|polygalacturonase, putative, expressed
									osa-miR1439	LOC_Os06g50070.1	2	955	975	UUUUGGAACGGAGUGAGUAUU	AAUACUACCUCCGUUCCAAAA	Cleavage	cDNA|expressed protein
									osa-miR1439	LOC_Os08g02300.1	2	1963	1983	UUUUGGAACGGAGUGAGUAUU	UAUACUCCCUCCGUUUUAAAA	Cleavage	cDNA|no apical meristem protein, putative, expressed
									osa-miR1439	LOC_Os07g48130.3	2	2817	2837	UUUUGGAACGGAGUGAGUAUU	UAUACUCCCUCCGUUUUAAAA	Cleavage	cDNA|potassium transporter, putative, expressed
									osa-miR1439	LOC_Os07g48130.2	2	2818	2838	UUUUGGAACGGAGUGAGUAUU	UAUACUCCCUCCGUUUUAAAA	Cleavage	cDNA|potassium transporter, putative, expressed
									osa-miR1439	LOC_Os07g48130.1	2	3148	3168	UUUUGGAACGGAGUGAGUAUU	UAUACUCCCUCCGUUUUAAAA	Cleavage	cDNA|potassium transporter, putative, expressed
									osa-miR1439	LOC_Os07g48130.4	2	3178	3198	UUUUGGAACGGAGUGAGUAUU	UAUACUCCCUCCGUUUUAAAA	Cleavage	cDNA|potassium transporter, putative, expressed
									osa-miR1439	LOC_Os07g17250.1	2	3628	3648	UUUUGGAACGGAGUGAGUAUU	UAUACUCCCUCCGUUUCGAAA	Cleavage	cDNA|disease resistance RPP13-like protein 1, putative, expressed
									osa-miR1439	LOC_Os04g40530.1	2	970	990	UUUUGGAACGGAGUGAGUAUU	UGUACUUCCUCCGUUUCAAAA	Cleavage	cDNA|methyltransferase domain containing protein, expressed
									osa-miR1439	LOC_Os04g38790.1	2	992	1012	UUUUGGAACGGAGUGAGUAUU	UGUACUCUCUCUGUUCUAAAA	Cleavage	cDNA|expressed protein
									osa-miR1439	LOC_Os08g36910.1	2	2622	2642	UUUUGGAACGGAGUGAGUAUU	UGUACUCCCUCCGUUUCGAAA	Cleavage	cDNA|alpha-amylase precursor, putative, expressed
									osa-miR1439	LOC_Os08g36910.3	2	2710	2730	UUUUGGAACGGAGUGAGUAUU	UGUACUCCCUCCGUUUCGAAA	Cleavage	cDNA|alpha-amylase precursor, putative, expressed
									osa-miR1439	LOC_Os08g36910.2	2	2746	2766	UUUUGGAACGGAGUGAGUAUU	UGUACUCCCUCCGUUUCGAAA	Cleavage	cDNA|alpha-amylase precursor, putative, expressed
									osa-miR1439	LOC_Os04g46610.2	2	2271	2291	UUUUGGAACGGAGUGAGUAUU	ACUGCUGACUCCGUUUCAAAA	Cleavage	cDNA|PAP fibrillin family domain containing protein, expressed
									osa-miR1439	LOC_Os04g46610.1	2	2427	2447	UUUUGGAACGGAGUGAGUAUU	ACUGCUGACUCCGUUUCAAAA	Cleavage	cDNA|PAP fibrillin family domain containing protein, expressed
									osa-miR1439	LOC_Os10g37070.1	2	1220	1240	UUUUGGAACGGAGUGAGUAUU	UUUGCUCCCUCCGUUUCAAAA	Cleavage	cDNA|cytochrome P450, putative, expressed
									osa-miR1439	LOC_Os12g44350.1	2	1265	1285	UUUUGGAACGGAGUGAGUAUU	CUUACUCCCUCCGUUUCGAAA	Cleavage	cDNA|actin, putative, expressed
									osa-miR1439	LOC_Os11g14390.1	2	1683	1703	UUUUGGAACGGAGUGAGUAUU	UCUACUCCCUCCGUUUCGAAA	Cleavage	cDNA|expressed protein
									osa-miR1440b	LOC_Os10g38040.1	2	945	965	UUUAGGAGAGUGGUAUUUGAG	CUCAAAUGCCACUCUCCCAAA	Cleavage	cDNA|lysM domain containing protein, putative, expressed
									osa-miR1440b	LOC_Os04g28780.1	2	479	499	UUUAGGAGAGUGGUAUUUGAG	CACGAGUGCCACUCUCCUGAA	Cleavage	cDNA|serine/threonine-protein kinase receptor precursor, putative, expressed
									osa-miR1440b	LOC_Os03g58230.1	2	1495	1515	UUUAGGAGAGUGGUAUUUGAG	AAUAACUACCACUCUCCUAGA	Cleavage	cDNA|plant-specific domain TIGR01615 family protein, expressed
									osa-miR1441	LOC_Os05g03440.1	2	1631	1651	ACCGGAUGUCGGAAAAGGUUU	AAACCCCUUCCGACAUCCGGU	Cleavage	cDNA|expressed protein
									osa-miR156a	LOC_Os09g03670.1	2	324	343	UGACAGAAGAGAGUGAGCAC	CUGUUCACUCUCUUCGGUCA	Cleavage	cDNA|retrotransposon protein, putative, unclassified, expressed
									osa-miR156b-5p	LOC_Os09g03670.1	2	324	343	UGACAGAAGAGAGUGAGCAC	CUGUUCACUCUCUUCGGUCA	Cleavage	cDNA|retrotransposon protein, putative, unclassified, expressed
									osa-miR156c-5p	LOC_Os09g03670.1	2	324	343	UGACAGAAGAGAGUGAGCAC	CUGUUCACUCUCUUCGGUCA	Cleavage	cDNA|retrotransposon protein, putative, unclassified, expressed
									osa-miR156d	LOC_Os09g03670.1	2	324	343	UGACAGAAGAGAGUGAGCAC	CUGUUCACUCUCUUCGGUCA	Cleavage	cDNA|retrotransposon protein, putative, unclassified, expressed
									osa-miR156e	LOC_Os09g03670.1	2	324	343	UGACAGAAGAGAGUGAGCAC	CUGUUCACUCUCUUCGGUCA	Cleavage	cDNA|retrotransposon protein, putative, unclassified, expressed
									osa-miR156f-5p	LOC_Os09g03670.1	2	324	343	UGACAGAAGAGAGUGAGCAC	CUGUUCACUCUCUUCGGUCA	Cleavage	cDNA|retrotransposon protein, putative, unclassified, expressed
									osa-miR156g-5p	LOC_Os09g03670.1	2	324	343	UGACAGAAGAGAGUGAGCAC	CUGUUCACUCUCUUCGGUCA	Cleavage	cDNA|retrotransposon protein, putative, unclassified, expressed
									osa-miR156h-5p	LOC_Os09g03670.1	2	324	343	UGACAGAAGAGAGUGAGCAC	CUGUUCACUCUCUUCGGUCA	Cleavage	cDNA|retrotransposon protein, putative, unclassified, expressed
									osa-miR156i	LOC_Os09g03670.1	2	324	343	UGACAGAAGAGAGUGAGCAC	CUGUUCACUCUCUUCGGUCA	Cleavage	cDNA|retrotransposon protein, putative, unclassified, expressed
									osa-miR156j-5p	LOC_Os09g03670.1	2	324	343	UGACAGAAGAGAGUGAGCAC	CUGUUCACUCUCUUCGGUCA	Cleavage	cDNA|retrotransposon protein, putative, unclassified, expressed
									osa-miR156k	LOC_Os02g43430.1	2	2005	2025	UGACAGAAGAGAGAGAGCACA	UCUGCUUUCUCUUUUUUGUUA	Cleavage	cDNA|protein kinase domain containing protein, expressed
									osa-miR156k	LOC_Os02g04450.3	2	670	690	UGACAGAAGAGAGAGAGCACA	UAUGCUCUCUUUUUUUUGUCG	Cleavage	cDNA|plant-specific domain TIGR01589 family protein, putative, expressed
									osa-miR156k	LOC_Os03g49710.1	2	827	847	UGACAGAAGAGAGAGAGCACA	CUUGCUGUCUCUCUUCUGUUG	Cleavage	cDNA|ribosomal protein S13p/S18e, putative, expressed
									osa-miR156k	LOC_Os02g43430.1	2	2005	2025	UGACAGAAGAGAGAGAGCACA	UCUGCUUUCUCUUUUUUGUUA	Cleavage	cDNA|protein kinase domain containing protein, expressed
									osa-miR156k	LOC_Os02g04450.3	2	670	690	UGACAGAAGAGAGAGAGCACA	UAUGCUCUCUUUUUUUUGUCG	Cleavage	cDNA|plant-specific domain TIGR01589 family protein, putative, expressed
									osa-miR156k	LOC_Os03g49710.1	2	827	847	UGACAGAAGAGAGAGAGCACA	CUUGCUGUCUCUCUUCUGUUG	Cleavage	cDNA|ribosomal protein S13p/S18e, putative, expressed
									osa-miR156l-5p	LOC_Os11g30370.1	2	1090	1110	CGACAGAAGAGAGUGAGCAUA	UGUGCUCUCUCUCUUCUGUCA	Cleavage	cDNA|OsSPL19 - SBP-box gene family member, expressed
									osa-miR156l-5p	LOC_Os09g32944.1	2	1033	1053	CGACAGAAGAGAGUGAGCAUA	UGUGCUCUCUCUCUUCUGUCA	Cleavage	cDNA|OsSPL18 - SBP-box gene family member, expressed
									osa-miR156l-5p	LOC_Os09g31438.1	2	808	828	CGACAGAAGAGAGUGAGCAUA	UGUGCUCUCUCUCUUCUGUCA	Cleavage	cDNA|OsSPL17 - SBP-box gene family member, expressed
									osa-miR156l-5p	LOC_Os08g41940.1	2	1053	1073	CGACAGAAGAGAGUGAGCAUA	UGUGCUCUCUCUCUUCUGUCA	Cleavage	cDNA|OsSPL16 - SBP-box gene family member, expressed
									osa-miR156l-5p	LOC_Os08g39890.1	2	991	1011	CGACAGAAGAGAGUGAGCAUA	UGUGCUCUCUCUCUUCUGUCA	Cleavage	cDNA|OsSPL14 - SBP-box gene family member, expressed
									osa-miR156l-5p	LOC_Os01g69830.1	2	1152	1172	CGACAGAAGAGAGUGAGCAUA	UGUGCUCUCUCUCUUCUGUCA	Cleavage	cDNA|OsSPL2 - SBP-box gene family member, expressed
									osa-miR156l-5p	LOC_Os07g32170.2	2	663	683	CGACAGAAGAGAGUGAGCAUA	CAUGCUCCCUCUCUUCUGUCA	Cleavage	cDNA|OsSPL13 - SBP-box gene family member, expressed
									osa-miR156l-5p	LOC_Os07g32170.1	2	851	871	CGACAGAAGAGAGUGAGCAUA	CAUGCUCCCUCUCUUCUGUCA	Cleavage	cDNA|OsSPL13 - SBP-box gene family member, expressed
									osa-miR156l-5p	LOC_Os02g04680.2	2	1961	1981	CGACAGAAGAGAGUGAGCAUA	CAUGCUCUCUCUCUUCUGUCA	Cleavage	cDNA|OsSPL3 - SBP-box gene family member, expressed
									osa-miR156l-5p	LOC_Os02g04680.1	2	1964	1984	CGACAGAAGAGAGUGAGCAUA	CAUGCUCUCUCUCUUCUGUCA	Cleavage	cDNA|OsSPL3 - SBP-box gene family member, expressed
									osa-miR156l-5p	LOC_Os06g45310.1	2	853	873	CGACAGAAGAGAGUGAGCAUA	CGUGCUCUCUCUCUUCUGUCA	Cleavage	cDNA|OsSPL11 - SBP-box gene family member, expressed
									osa-miR156l-5p	LOC_Os04g46580.1	2	817	837	CGACAGAAGAGAGUGAGCAUA	GGUGCUCUCUCUCUUCUGUCA	Cleavage	cDNA|OsSPL7 - SBP-box gene family member, expressed
									osa-miR156l-5p	LOC_Os02g07780.1	2	986	1006	CGACAGAAGAGAGUGAGCAUA	CGUGCUCUCUCUCUUCUGUCA	Cleavage	cDNA|OsSPL4 - SBP-box gene family member, expressed
									osa-miR156l-5p	LOC_Os06g49010.3	2	1438	1458	CGACAGAAGAGAGUGAGCAUA	CGUGCUCUCUCUCUUCUGUCA	Cleavage	cDNA|OsSPL12 - SBP-box gene family member, expressed
									osa-miR156l-5p	LOC_Os06g49010.2	2	1493	1513	CGACAGAAGAGAGUGAGCAUA	CGUGCUCUCUCUCUUCUGUCA	Cleavage	cDNA|OsSPL12 - SBP-box gene family member, expressed
									osa-miR156l-5p	LOC_Os06g49010.4	2	1637	1657	CGACAGAAGAGAGUGAGCAUA	CGUGCUCUCUCUCUUCUGUCA	Cleavage	cDNA|OsSPL12 - SBP-box gene family member, expressed
									osa-miR156l-5p	LOC_Os06g49010.1	2	1685	1705	CGACAGAAGAGAGUGAGCAUA	CGUGCUCUCUCUCUUCUGUCA	Cleavage	cDNA|OsSPL12 - SBP-box gene family member, expressed
									osa-miR156l-5p	LOC_Os06g49010.6	2	1841	1861	CGACAGAAGAGAGUGAGCAUA	CGUGCUCUCUCUCUUCUGUCA	Cleavage	cDNA|OsSPL12 - SBP-box gene family member, expressed
									osa-miR156l-5p	LOC_Os06g49010.5	2	2017	2037	CGACAGAAGAGAGUGAGCAUA	CGUGCUCUCUCUCUUCUGUCA	Cleavage	cDNA|OsSPL12 - SBP-box gene family member, expressed
									osa-miR156l-5p	LOC_Os02g07780.2	2	2220	2240	CGACAGAAGAGAGUGAGCAUA	CGUGCUCUCUCUCUUCUGUCA	Cleavage	cDNA|OsSPL4 - SBP-box gene family member, expressed
									osa-miR159a.1	LOC_Os04g46384.1	2	160	180	UUUGGAUUGAAGGGAGCUCUG	UGGAGCUCCAUUCGAUCCAAA	Cleavage	cDNA|MYB family transcription factor, putative, expressed
									osa-miR159a.1	LOC_Os01g59660.1	2	1260	1280	UUUGGAUUGAAGGGAGCUCUG	UGGAGCUCCCUUCACUCCAAG	Cleavage	cDNA|MYB family transcription factor, putative, expressed
									osa-miR159a.1	LOC_Os01g59660.4	2	1180	1200	UUUGGAUUGAAGGGAGCUCUG	UGGAGCUCCCUUCACUCCAAG	Cleavage	cDNA|MYB family transcription factor, putative, expressed
									osa-miR159a.1	LOC_Os01g59660.3	2	1258	1278	UUUGGAUUGAAGGGAGCUCUG	UGGAGCUCCCUUCACUCCAAG	Cleavage	cDNA|MYB family transcription factor, putative, expressed
									osa-miR159a.1	LOC_Os01g59660.2	2	1348	1368	UUUGGAUUGAAGGGAGCUCUG	UGGAGCUCCCUUCACUCCAAG	Cleavage	cDNA|MYB family transcription factor, putative, expressed
									osa-miR159a.1	LOC_Os03g21380.1	2	1516	1536	UUUGGAUUGAAGGGAGCUCUG	UUGAGUUCCCUUCAUUCCAAA	Cleavage	cDNA|OsCML27 - Calmodulin-related calcium sensor protein, expressed
									osa-miR159b	LOC_Os04g46384.1	2	160	180	UUUGGAUUGAAGGGAGCUCUG	UGGAGCUCCAUUCGAUCCAAA	Cleavage	cDNA|MYB family transcription factor, putative, expressed
									osa-miR159b	LOC_Os01g59660.1	2	1260	1280	UUUGGAUUGAAGGGAGCUCUG	UGGAGCUCCCUUCACUCCAAG	Cleavage	cDNA|MYB family transcription factor, putative, expressed
									osa-miR159b	LOC_Os01g59660.4	2	1180	1200	UUUGGAUUGAAGGGAGCUCUG	UGGAGCUCCCUUCACUCCAAG	Cleavage	cDNA|MYB family transcription factor, putative, expressed
									osa-miR159b	LOC_Os01g59660.3	2	1258	1278	UUUGGAUUGAAGGGAGCUCUG	UGGAGCUCCCUUCACUCCAAG	Cleavage	cDNA|MYB family transcription factor, putative, expressed
									osa-miR159b	LOC_Os01g59660.2	2	1348	1368	UUUGGAUUGAAGGGAGCUCUG	UGGAGCUCCCUUCACUCCAAG	Cleavage	cDNA|MYB family transcription factor, putative, expressed
									osa-miR159b	LOC_Os03g21380.1	2	1516	1536	UUUGGAUUGAAGGGAGCUCUG	UUGAGUUCCCUUCAUUCCAAA	Cleavage	cDNA|OsCML27 - Calmodulin-related calcium sensor protein, expressed
									osa-miR166i-5p	LOC_Os01g42294.1	2	2503	2523	AAUGCAGUUUGAUCCAAGAUC	UUUGUUGGAUCAAAUUGUAUU	Cleavage	cDNA|inactive receptor kinase At2g26730 precursor, putative, expressed
									osa-miR168a-5p	LOC_Os02g47690.1	2	426	446	UCGCUUGGUGCAGAUCGGGAC	ACUCGGAUCUGCACCAGGCGA	Cleavage	cDNA|retrotransposon protein, putative, Ty3-gypsy subclass, expressed
									osa-miR169d	LOC_Os03g07880.3	2	756	776	UAGCCAAGGAUGAAUUGCCGG	AUGGCAAAUCAUCCUUGGCUU	Cleavage	cDNA|nuclear transcription factor Y subunit, putative, expressed
									osa-miR169d	LOC_Os03g07880.1	2	844	864	UAGCCAAGGAUGAAUUGCCGG	AUGGCAAAUCAUCCUUGGCUU	Cleavage	cDNA|nuclear transcription factor Y subunit, putative, expressed
									osa-miR169d	LOC_Os03g07880.2	2	993	1013	UAGCCAAGGAUGAAUUGCCGG	AUGGCAAAUCAUCCUUGGCUU	Cleavage	cDNA|nuclear transcription factor Y subunit, putative, expressed
									osa-miR169d	LOC_Os12g42400.2	2	1202	1222	UAGCCAAGGAUGAAUUGCCGG	UAGGCAACUCAUUCUUGGCUG	Cleavage	cDNA|nuclear transcription factor Y subunit, putative, expressed
									osa-miR169d	LOC_Os12g42400.3	2	1247	1267	UAGCCAAGGAUGAAUUGCCGG	UAGGCAACUCAUUCUUGGCUG	Cleavage	cDNA|nuclear transcription factor Y subunit, putative, expressed
									osa-miR169d	LOC_Os12g42400.1	2	1256	1276	UAGCCAAGGAUGAAUUGCCGG	UAGGCAACUCAUUCUUGGCUG	Cleavage	cDNA|nuclear transcription factor Y subunit, putative, expressed
									osa-miR169n	LOC_Os03g44540.1	2	1718	1738	UAGCCAAGAAUGACUUGCCUA	UAGGCAAAUCAUUCUUGGCUC	Cleavage	cDNA|nuclear transcription factor Y subunit, putative, expressed
									osa-miR169n	LOC_Os03g48970.4	2	1228	1248	UAGCCAAGAAUGACUUGCCUA	CAGGCAAUUCAUUCUUGGCUU	Cleavage	cDNA|nuclear transcription factor Y subunit, putative, expressed
									osa-miR169n	LOC_Os03g48970.1	2	1236	1256	UAGCCAAGAAUGACUUGCCUA	CAGGCAAUUCAUUCUUGGCUU	Cleavage	cDNA|nuclear transcription factor Y subunit, putative, expressed
									osa-miR169n	LOC_Os03g48970.2	2	1765	1785	UAGCCAAGAAUGACUUGCCUA	CAGGCAAUUCAUUCUUGGCUU	Cleavage	cDNA|nuclear transcription factor Y subunit, putative, expressed
									osa-miR169n	LOC_Os03g48970.3	2	1935	1955	UAGCCAAGAAUGACUUGCCUA	CAGGCAAUUCAUUCUUGGCUU	Cleavage	cDNA|nuclear transcription factor Y subunit, putative, expressed
									osa-miR169n	LOC_Os02g19970.1	2	1575	1595	UAGCCAAGAAUGACUUGCCUA	ACUGUAAGUCAUUCUUGGUUA	Cleavage	cDNA|aminotransferase, classes I and II, domain containing protein, expressed
									osa-miR169n	LOC_Os02g19970.2	2	1659	1679	UAGCCAAGAAUGACUUGCCUA	ACUGUAAGUCAUUCUUGGUUA	Cleavage	cDNA|aminotransferase, classes I and II, domain containing protein, expressed
									osa-miR169o	LOC_Os03g44540.1	2	1718	1738	UAGCCAAGAAUGACUUGCCUA	UAGGCAAAUCAUUCUUGGCUC	Cleavage	cDNA|nuclear transcription factor Y subunit, putative, expressed
									osa-miR169o	LOC_Os03g48970.4	2	1228	1248	UAGCCAAGAAUGACUUGCCUA	CAGGCAAUUCAUUCUUGGCUU	Cleavage	cDNA|nuclear transcription factor Y subunit, putative, expressed
									osa-miR169o	LOC_Os03g48970.1	2	1236	1256	UAGCCAAGAAUGACUUGCCUA	CAGGCAAUUCAUUCUUGGCUU	Cleavage	cDNA|nuclear transcription factor Y subunit, putative, expressed
									osa-miR169o	LOC_Os03g48970.2	2	1765	1785	UAGCCAAGAAUGACUUGCCUA	CAGGCAAUUCAUUCUUGGCUU	Cleavage	cDNA|nuclear transcription factor Y subunit, putative, expressed
									osa-miR169o	LOC_Os03g48970.3	2	1935	1955	UAGCCAAGAAUGACUUGCCUA	CAGGCAAUUCAUUCUUGGCUU	Cleavage	cDNA|nuclear transcription factor Y subunit, putative, expressed
									osa-miR169o	LOC_Os02g19970.1	2	1575	1595	UAGCCAAGAAUGACUUGCCUA	ACUGUAAGUCAUUCUUGGUUA	Cleavage	cDNA|aminotransferase, classes I and II, domain containing protein, expressed
									osa-miR169o	LOC_Os02g19970.2	2	1659	1679	UAGCCAAGAAUGACUUGCCUA	ACUGUAAGUCAUUCUUGGUUA	Cleavage	cDNA|aminotransferase, classes I and II, domain containing protein, expressed
									osa-miR169q	LOC_Os09g33555.1	2	236	256	UAGCCAAGGAGACUGCCCAUG	CACAGGCAGUCUCCUUGGCUA	Cleavage	cDNA|expressed protein
									osa-miR171c-5p	LOC_Os03g38170.2	2	377	397	GGAUAUUGGUGCGGUUCAAUC	GAUUGAGCCGCGUCAAUAUCU	Cleavage	cDNA|expressed protein
									osa-miR171d-5p	LOC_Os11g09750.1	2	1945	1965	UGUUGGCCCGGCUCACUCAGA	UCUGAGCUAGCCGGGCCAACA	Cleavage	cDNA|transposon protein, putative, CACTA, En/Spm sub-class, expressed
									osa-miR171d-5p	LOC_Os05g15320.1	2	910	930	UGUUGGCCCGGCUCACUCAGA	UCUGAGCUAGCCGGGCCAACA	Cleavage	cDNA|transposon protein, putative, CACTA, En/Spm sub-class, expressed
									osa-miR172a	LOC_Os03g13370.1	2	2399	2419	AGAAUCUUGAUGAUGCUGCAU	UCGCCGUAUCAUCAAGAUUUU	Cleavage	cDNA|tetratricopeptide repeat domain containing protein, expressed
									osa-miR172b	LOC_Os02g56320.1	2	509	529	GGAAUCUUGAUGAUGCUGCAU	UAGCAGAAUCAUCAAGGUUCU	Cleavage	cDNA|glycogen synthase 1, putative, expressed
									osa-miR172d-3p	LOC_Os03g13370.1	2	2399	2419	AGAAUCUUGAUGAUGCUGCAU	UCGCCGUAUCAUCAAGAUUUU	Cleavage	cDNA|tetratricopeptide repeat domain containing protein, expressed
									osa-miR172d-5p	LOC_Os01g56790.1	2	525	544	GCAGCACCAUCAAGAUUCAC	GUGGAUCUUGAUGCUGCUGC	Cleavage	cDNA|expressed protein
									osa-miR1846e	LOC_Os01g70100.1	2	668	687	CAACGAGGAGGCCGGGACCA	CUGUACCGGCCUCCUCGUUG	Cleavage	cDNA|zinc finger DHHC domain-containing protein, putative, expressed
									osa-miR1847.1	LOC_Os03g52770.1	2	1311	1331	UGCAGUUUGCAGUUGUGGCAC	GAGUCACAGCUGCAAACUGCC	Cleavage	cDNA|expressed protein
									osa-miR1847.2	LOC_Os05g37840.1	2	365	388	UGGCCCACAUGUUAGUGCCACAAC	CCGGUGACACUAACAUGUGGGCCU	Cleavage	cDNA|expressed protein
									osa-miR1847.2	LOC_Os09g20190.1	2	323	346	UGGCCCACAUGUUAGUGCCACAAC	AGGGGGGCACUAACAUGUGGGUGA	Cleavage	cDNA|expressed protein
									osa-miR1848	LOC_Os09g10290.1	2	365	385	CCUCGCCGGCGCGCGCGUGCA	UGCACGCGCGCGCCGGCUGGG	Cleavage	cDNA|retrotransposon protein, putative, Ty1-copia subclass, expressed
									osa-miR1848	LOC_Os12g18374.2	2	1479	1499	CCUCGCCGGCGCGCGCGUGCA	GGUACGCGCGCGGCGGCGAGG	Cleavage	cDNA|NB-ARC domain containing protein, expressed
									osa-miR1848	LOC_Os04g29780.1	2	24	44	CCUCGCCGGCGCGCGCGUGCA	UGCACGCGCGCGCCGGCUGGG	Cleavage	cDNA|retrotransposon protein, putative, Ty1-copia subclass, expressed
									osa-miR1848	LOC_Os12g18374.1	2	1482	1502	CCUCGCCGGCGCGCGCGUGCA	GGUACGCGCGCGGCGGCGAGG	Cleavage	cDNA|NB-ARC domain containing protein, expressed
									osa-miR1848	LOC_Os06g45040.1	2	553	573	CCUCGCCGGCGCGCGCGUGCA	UGCGCGCACGUGCCGGCGAGG	Cleavage	cDNA|B-box zinc finger family protein, putative, expressed
									osa-miR1848	LOC_Os03g16760.1	2	1278	1298	CCUCGCCGGCGCGCGCGUGCA	CUGGCGCGCGCGCUGGCGAGG	Cleavage	cDNA|protein phosphatase 2C, putative, expressed
									osa-miR1848	LOC_Os06g04070.1	2	2458	2478	CCUCGCCGGCGCGCGCGUGCA	GUCACGCGCGCGGCGGCGGGG	Cleavage	cDNA|pyridoxal-dependent decarboxylase protein, putative, expressed
									osa-miR1848	LOC_Os01g51320.1	2	389	409	CCUCGCCGGCGCGCGCGUGCA	AGGCCGCGCGCGCCGGCGAGG	Cleavage	cDNA|peroxisomal N-acetyl-spermine/spermidine oxidase precursor, putative, expressed
									osa-miR1848	LOC_Os10g30290.1	2	513	533	CCUCGCCGGCGCGCGCGUGCA	GCGACGCGCGCGCCGGCGAGA	Cleavage	cDNA|GDSL-like lipase/acylhydrolase, putative, expressed
									osa-miR1848	LOC_Os02g07930.1	2	842	862	CCUCGCCGGCGCGCGCGUGCA	AGCGCGCACGUGCCGGCGAGG	Cleavage	cDNA|B-box zinc finger family protein, putative, expressed
									osa-miR1848	LOC_Os09g29660.1	2	470	490	CCUCGCCGGCGCGCGCGUGCA	GCUACGCGCGCCCCGGCGAGG	Translation	cDNA|white-brown complex homolog protein 11, putative, expressed
									osa-miR1848	LOC_Os07g18874.1	2	480	500	CCUCGCCGGCGCGCGCGUGCA	GCUACGCGCGCCCCGGCGAGG	Translation	cDNA|white-brown complex homolog protein 11, putative, expressed
									osa-miR1848	LOC_Os08g10649.1	2	352	372	CCUCGCCGGCGCGCGCGUGCA	UCCGCGCGCGCGCCGACGAGG	Cleavage	cDNA|GTPase of unknown function domain containing protein, putative, expressed
									osa-miR1848	LOC_Os05g33940.1	2	900	920	CCUCGCCGGCGCGCGCGUGCA	UCGGCGCGCGCGUCGGCGAGG	Cleavage	cDNA|alpha/beta hydrolase fold, putative, expressed
									osa-miR1848	LOC_Os06g39780.1	2	547	567	CCUCGCCGGCGCGCGCGUGCA	UCCGCGCGCACGCCGGCGAGG	Cleavage	cDNA|cytochrome P450, putative, expressed
									osa-miR1848	LOC_Os02g36110.1	2	527	547	CCUCGCCGGCGCGCGCGUGCA	UCCGCGCGCACGCCGGCGAGG	Cleavage	cDNA|cytochrome P450, putative, expressed
									osa-miR1848	LOC_Os09g29670.1	2	389	409	CCUCGCCGGCGCGCGCGUGCA	GCUACGCGCGCCCCGGCGAGG	Translation	cDNA|white-brown complex homolog protein 11, putative, expressed
									osa-miR1848	LOC_Os04g54970.1	2	42	62	CCUCGCCGGCGCGCGCGUGCA	CGCACGCCCGCGCCGGCGAGA	Cleavage	cDNA|expressed protein
									osa-miR1848	LOC_Os10g04030.1	2	415	435	CCUCGCCGGCGCGCGCGUGCA	ACGGCGCGCGCGCUGGCGAGG	Cleavage	cDNA|expressed protein
									osa-miR1848	LOC_Os07g37980.1	2	629	649	CCUCGCCGGCGCGCGCGUGCA	GGCACGCCUGCGUCGGCGAGG	Cleavage	cDNA|cytochrome P450 51, putative, expressed
									osa-miR1848	LOC_Os05g02900.1	2	137	157	CCUCGCCGGCGCGCGCGUGCA	GACGCGCGUGUGCCGGUGAGG	Cleavage	cDNA|expressed protein
									osa-miR1848	LOC_Os12g37900.1	2	421	441	CCUCGCCGGCGCGCGCGUGCA	UUCGUGUGCGUGCCGGCGAGG	Cleavage	cDNA|expressed protein
									osa-miR1850.1	LOC_Os10g36650.1	2	3	23	UGGAAAGUUGGGAGAUUGGGG	CCUCAAGCUCUCAACUUUCCA	Cleavage	cDNA|actin, putative, expressed
									osa-miR1850.1	LOC_Os03g01216.1	2	1657	1677	UGGAAAGUUGGGAGAUUGGGG	UUCUAAACUUCCAACUUUCCA	Cleavage	cDNA|phosphatidylserine decarboxylase, putative, expressed
									osa-miR1850.1	LOC_Os08g06478.1	2	1852	1872	UGGAAAGUUGGGAGAUUGGGG	UUCCAAACUUCUAACUUUCCA	Cleavage	cDNA|expressed protein
									osa-miR1853-5p	LOC_Os08g41380.1	2	1504	1527	AGCAUUCAAACAUUCCCAAUUACC	AAUUGAUGGGGAUGUUUGAAUGUU	Cleavage	cDNA|pentatricopeptide, putative, expressed
									osa-miR1853-5p	LOC_Os10g31490.1	2	709	732	AGCAUUCAAACAUUCCCAAUUACC	ACACUUUGUGAAUGUUUGGAUGUU	Cleavage	cDNA|retrotransposon protein, putative, unclassified, expressed
									osa-miR1854-3p	LOC_Os10g21400.1	2	2258	2279	UCCAAUUUGGGGAUUUGCUGAU	AGGAGGAAGUCCUCAAAUUGGA	Cleavage	cDNA|disease resistance protein RPM1, putative, expressed
									osa-miR1854-5p	LOC_Os05g05810.1	2	2784	2804	UGGUGAAAUUUGUAGAUUGGA	GCCACUCUACAGGUUUCACCA	Cleavage	cDNA|DEAD-box ATP-dependent RNA helicase, putative, expressed
									osa-miR1854-5p	LOC_Os05g05810.2	2	2800	2820	UGGUGAAAUUUGUAGAUUGGA	GCCACUCUACAGGUUUCACCA	Cleavage	cDNA|DEAD-box ATP-dependent RNA helicase, putative, expressed
									osa-miR1854-5p	LOC_Os01g73790.1	2	1743	1763	UGGUGAAAUUUGUAGAUUGGA	CAAAAUCUGCAAAUUUCACUA	Cleavage	cDNA|NAD dependent epimerase/dehydratase family protein, putative, expressed
									osa-miR1854-5p	LOC_Os05g45870.1	2	1208	1228	UGGUGAAAUUUGUAGAUUGGA	UUCAAUACACAAAUUUCACCA	Cleavage	cDNA|OsFBL25 - F-box domain and LRR containing protein, expressed
									osa-miR1854-5p	LOC_Os05g05810.1	2	2784	2804	UGGUGAAAUUUGUAGAUUGGA	GCCACUCUACAGGUUUCACCA	Cleavage	cDNA|DEAD-box ATP-dependent RNA helicase, putative, expressed
									osa-miR1854-5p	LOC_Os05g05810.2	2	2800	2820	UGGUGAAAUUUGUAGAUUGGA	GCCACUCUACAGGUUUCACCA	Cleavage	cDNA|DEAD-box ATP-dependent RNA helicase, putative, expressed
									osa-miR1854-5p	LOC_Os01g73790.1	2	1743	1763	UGGUGAAAUUUGUAGAUUGGA	CAAAAUCUGCAAAUUUCACUA	Cleavage	cDNA|NAD dependent epimerase/dehydratase family protein, putative, expressed
									osa-miR1854-5p	LOC_Os05g45870.1	2	1208	1228	UGGUGAAAUUUGUAGAUUGGA	UUCAAUACACAAAUUUCACCA	Cleavage	cDNA|OsFBL25 - F-box domain and LRR containing protein, expressed
									osa-miR1858a	LOC_Os01g54010.1	2	451	471	GAGAGGAGGACGGAGUGGGGC	GCCCUACUCCGUCCUCCUCGC	Cleavage	cDNA|peptidase, putative, expressed
									osa-miR1858a	LOC_Os02g03040.3	2	3	23	GAGAGGAGGACGGAGUGGGGC	UCCCCACUCUCUCCUCCUCUC	Translation	cDNA|RNA recognition motif containing protein, expressed
									osa-miR1858a	LOC_Os02g03040.4	2	3	23	GAGAGGAGGACGGAGUGGGGC	UCCCCACUCUCUCCUCCUCUC	Translation	cDNA|RNA recognition motif containing protein, expressed
									osa-miR1858a	LOC_Os06g49880.1	2	23	43	GAGAGGAGGACGGAGUGGGGC	CCUCCACUUCGUCCUCUUCUU	Cleavage	cDNA|B-box zinc finger family protein, putative, expressed
									osa-miR1858a	LOC_Os02g03040.2	2	3	23	GAGAGGAGGACGGAGUGGGGC	UCCCCACUCUCUCCUCCUCUC	Translation	cDNA|RNA recognition motif containing protein, expressed
									osa-miR1858a	LOC_Os06g49880.2	2	23	43	GAGAGGAGGACGGAGUGGGGC	CCUCCACUUCGUCCUCUUCUU	Cleavage	cDNA|B-box zinc finger family protein, putative, expressed
									osa-miR1858a	LOC_Os02g03040.1	2	3	23	GAGAGGAGGACGGAGUGGGGC	UCCCCACUCUCUCCUCCUCUC	Translation	cDNA|RNA recognition motif containing protein, expressed
									osa-miR1858a	LOC_Os09g04670.1	2	48	68	GAGAGGAGGACGGAGUGGGGC	GUCGCGCUUCGUCCUCCUCUC	Cleavage	cDNA|DAG protein, chloroplast precursor, putative, expressed
									osa-miR1858a	LOC_Os01g59630.1	2	119	139	GAGAGGAGGACGGAGUGGGGC	CUCCUACUCCCUCCUCCUCUC	Translation	cDNA|exostosin family domain containing protein, expressed
									osa-miR1858a	LOC_Os03g18900.1	2	89	109	GAGAGGAGGACGGAGUGGGGC	UUCUCACUCCGUCCGCCUCUC	Cleavage	cDNA|retrotransposon protein, putative, Ty3-gypsy subclass, expressed
									osa-miR1858a	LOC_Os05g08410.2	2	5	25	GAGAGGAGGACGGAGUGGGGC	CUACUACUCCGUCCUCCUCUU	Cleavage	cDNA|ATP10 protein, expressed
									osa-miR1858a	LOC_Os05g08410.1	2	5	25	GAGAGGAGGACGGAGUGGGGC	CUACUACUCCGUCCUCCUCUU	Cleavage	cDNA|ATP10 protein, expressed
									osa-miR1858a	LOC_Os04g48970.1	2	24	44	GAGAGGAGGACGGAGUGGGGC	CUCCCUCUUCGUUCUCCUCUC	Cleavage	cDNA|transposon protein, putative, unclassified, expressed
									osa-miR1858a	LOC_Os02g20934.2	2	423	443	GAGAGGAGGACGGAGUGGGGC	CUUCCACGCCGUCUUCCUCUC	Cleavage	cDNA|expressed protein
									osa-miR1858a	LOC_Os07g01214.1	2	1921	1941	GAGAGGAGGACGGAGUGGGGC	CAUCCACACCGUCCUCCUCUU	Cleavage	cDNA|transposon protein, putative, unclassified, expressed
									osa-miR1858b	LOC_Os01g54010.1	2	451	471	GAGAGGAGGACGGAGUGGGGC	GCCCUACUCCGUCCUCCUCGC	Cleavage	cDNA|peptidase, putative, expressed
									osa-miR1858b	LOC_Os02g03040.3	2	3	23	GAGAGGAGGACGGAGUGGGGC	UCCCCACUCUCUCCUCCUCUC	Translation	cDNA|RNA recognition motif containing protein, expressed
									osa-miR1858b	LOC_Os02g03040.4	2	3	23	GAGAGGAGGACGGAGUGGGGC	UCCCCACUCUCUCCUCCUCUC	Translation	cDNA|RNA recognition motif containing protein, expressed
									osa-miR1858b	LOC_Os06g49880.1	2	23	43	GAGAGGAGGACGGAGUGGGGC	CCUCCACUUCGUCCUCUUCUU	Cleavage	cDNA|B-box zinc finger family protein, putative, expressed
									osa-miR1858b	LOC_Os02g03040.2	2	3	23	GAGAGGAGGACGGAGUGGGGC	UCCCCACUCUCUCCUCCUCUC	Translation	cDNA|RNA recognition motif containing protein, expressed
									osa-miR1858b	LOC_Os06g49880.2	2	23	43	GAGAGGAGGACGGAGUGGGGC	CCUCCACUUCGUCCUCUUCUU	Cleavage	cDNA|B-box zinc finger family protein, putative, expressed
									osa-miR1858b	LOC_Os02g03040.1	2	3	23	GAGAGGAGGACGGAGUGGGGC	UCCCCACUCUCUCCUCCUCUC	Translation	cDNA|RNA recognition motif containing protein, expressed
									osa-miR1858b	LOC_Os09g04670.1	2	48	68	GAGAGGAGGACGGAGUGGGGC	GUCGCGCUUCGUCCUCCUCUC	Cleavage	cDNA|DAG protein, chloroplast precursor, putative, expressed
									osa-miR1858b	LOC_Os01g59630.1	2	119	139	GAGAGGAGGACGGAGUGGGGC	CUCCUACUCCCUCCUCCUCUC	Translation	cDNA|exostosin family domain containing protein, expressed
									osa-miR1858b	LOC_Os03g18900.1	2	89	109	GAGAGGAGGACGGAGUGGGGC	UUCUCACUCCGUCCGCCUCUC	Cleavage	cDNA|retrotransposon protein, putative, Ty3-gypsy subclass, expressed
									osa-miR1858b	LOC_Os05g08410.2	2	5	25	GAGAGGAGGACGGAGUGGGGC	CUACUACUCCGUCCUCCUCUU	Cleavage	cDNA|ATP10 protein, expressed
									osa-miR1858b	LOC_Os05g08410.1	2	5	25	GAGAGGAGGACGGAGUGGGGC	CUACUACUCCGUCCUCCUCUU	Cleavage	cDNA|ATP10 protein, expressed
									osa-miR1858b	LOC_Os04g48970.1	2	24	44	GAGAGGAGGACGGAGUGGGGC	CUCCCUCUUCGUUCUCCUCUC	Cleavage	cDNA|transposon protein, putative, unclassified, expressed
									osa-miR1858b	LOC_Os02g20934.2	2	423	443	GAGAGGAGGACGGAGUGGGGC	CUUCCACGCCGUCUUCCUCUC	Cleavage	cDNA|expressed protein
									osa-miR1858b	LOC_Os07g01214.1	2	1921	1941	GAGAGGAGGACGGAGUGGGGC	CAUCCACACCGUCCUCCUCUU	Cleavage	cDNA|transposon protein, putative, unclassified, expressed
									osa-miR1861h	LOC_Os05g51790.1	2	578	599	CGGUCUUGAGGCAGGAACUGAG	CCCAGUUUCUUCCUCAAGACCG	Cleavage	cDNA|RecF/RecN/SMC N terminal domain containing protein, expressed
									osa-miR1861h	LOC_Os05g51790.2	2	533	554	CGGUCUUGAGGCAGGAACUGAG	CCCAGUUUCUUCCUCAAGACCG	Cleavage	cDNA|RecF/RecN/SMC N terminal domain containing protein, expressed
									osa-miR1861j	LOC_Os05g51790.1	2	578	599	CGGUCUUGAGGCAGGAACUGAG	CCCAGUUUCUUCCUCAAGACCG	Cleavage	cDNA|RecF/RecN/SMC N terminal domain containing protein, expressed
									osa-miR1861j	LOC_Os05g51790.2	2	533	554	CGGUCUUGAGGCAGGAACUGAG	CCCAGUUUCUUCCUCAAGACCG	Cleavage	cDNA|RecF/RecN/SMC N terminal domain containing protein, expressed
									osa-miR1862d	LOC_Os03g52280.1	2	700	723	ACUAGGUUUGUUUAUUUUGGGACG	AGUUGCAAAAUAAACCAAUCUAGU	Cleavage	cDNA|expressed protein
									osa-miR1862d	LOC_Os05g25890.1	2	802	825	ACUAGGUUUGUUUAUUUUGGGACG	CAUAUCAGAAUAAACAAAACUAGU	Cleavage	cDNA|expressed protein
									osa-miR1862f	LOC_Os07g37560.3	2	1137	1156	AUGAGGUUGGUUUAUUUUGG	UCAGAAUAAAUCAACCUUGU	Cleavage	cDNA|myosin-Vb, putative, expressed
									osa-miR1862f	LOC_Os07g37560.2	2	2305	2324	AUGAGGUUGGUUUAUUUUGG	UCAGAAUAAAUCAACCUUGU	Cleavage	cDNA|myosin-Vb, putative, expressed
									osa-miR1862f	LOC_Os07g37560.1	2	2305	2324	AUGAGGUUGGUUUAUUUUGG	UCAGAAUAAAUCAACCUUGU	Cleavage	cDNA|myosin-Vb, putative, expressed
									osa-miR1862g	LOC_Os07g37560.3	2	1137	1156	AUGAGGUUGGUUUAUUUUGG	UCAGAAUAAAUCAACCUUGU	Cleavage	cDNA|myosin-Vb, putative, expressed
									osa-miR1862g	LOC_Os07g37560.2	2	2305	2324	AUGAGGUUGGUUUAUUUUGG	UCAGAAUAAAUCAACCUUGU	Cleavage	cDNA|myosin-Vb, putative, expressed
									osa-miR1862g	LOC_Os07g37560.1	2	2305	2324	AUGAGGUUGGUUUAUUUUGG	UCAGAAUAAAUCAACCUUGU	Cleavage	cDNA|myosin-Vb, putative, expressed
									osa-miR1863a	LOC_Os10g37090.1	2	37	60	AGCUCUGAUACCAUGUUAGAUUAG	ACUAUCCAACAUGGUAUCAGAGCG	Cleavage	cDNA|expressed protein
									osa-miR1863a	LOC_Os04g28234.1	2	3082	3105	AGCUCUGAUACCAUGUUAGAUUAG	UGUUCAUAACAUGGUAUCAGAGCA	Cleavage	cDNA|Rf1, mitochondrial precursor, putative, expressed
									osa-miR1863a	LOC_Os05g02350.1	2	582	605	AGCUCUGAUACCAUGUUAGAUUAG	CAGACUCAGCAUGGUAUCAGAGCU	Cleavage	cDNA|endonuclease/exonuclease/phosphatase family domain containing protein, expressed
									osa-miR1863a	LOC_Os02g34760.1	2	39	62	AGCUCUGAUACCAUGUUAGAUUAG	UCACUGUAAGAUGGUAUCAGAGCU	Cleavage	cDNA|retrotransposon protein, putative, unclassified, expressed
									osa-miR1863a	LOC_Os05g50070.1	2	791	814	AGCUCUGAUACCAUGUUAGAUUAG	CCACAUUGAAAUGGUAUCAGAGCU	Cleavage	cDNA|retrotransposon protein, putative, unclassified, expressed
									osa-miR1863b	LOC_Os01g03230.1	2	46	69	AGCUCUGAUACCAUGUUAACUGUU	CACGCUUCACAUGGUAUCAGAGCC	Cleavage	cDNA|retrotransposon protein, putative, unclassified, expressed
									osa-miR1863b	LOC_Os05g13804.1	2	35	58	AGCUCUGAUACCAUGUUAACUGUU	ACUAUCUAACAUGGUAUCAGAGCG	Cleavage	cDNA|expressed protein
									osa-miR1863b	LOC_Os04g28234.1	2	3082	3105	AGCUCUGAUACCAUGUUAACUGUU	UGUUCAUAACAUGGUAUCAGAGCA	Cleavage	cDNA|Rf1, mitochondrial precursor, putative, expressed
									osa-miR1863b	LOC_Os01g43340.1	2	464	487	AGCUCUGAUACCAUGUUAACUGUU	UCCGUUUUACAUGGUAUCAGAGCC	Cleavage	cDNA|retrotransposon protein, putative, unclassified, expressed
									osa-miR1863b	LOC_Os02g34760.1	2	39	62	AGCUCUGAUACCAUGUUAACUGUU	UCACUGUAAGAUGGUAUCAGAGCU	Cleavage	cDNA|retrotransposon protein, putative, unclassified, expressed
									osa-miR1863b	LOC_Os05g45130.1	2	60	83	AGCUCUGAUACCAUGUUAACUGUU	UGAUUUUCACAUGGUAUCAGAGCC	Cleavage	cDNA|retrotransposon protein, putative, unclassified, expressed
									osa-miR1864	LOC_Os01g14020.2	2	274	297	UUGUAGUAACGUGAUGGUCAAUGU	AGAUUAACCAUCGUGUUACUACAA	Cleavage	cDNA|expressed protein
									osa-miR1864	LOC_Os01g14020.1	2	274	297	UUGUAGUAACGUGAUGGUCAAUGU	AGAUUAACCAUCGUGUUACUACAA	Cleavage	cDNA|expressed protein
									osa-miR1866-3p	LOC_Os09g21110.1	2	3950	3971	UGAAAUUCCUGUAAAAUUCUUG	UAGGAAUUUUAUAGGAUUUUCA	Cleavage	cDNA|leucyl-tRNA synthetase, cytoplasmic, putative, expressed
									osa-miR1866-3p	LOC_Os12g15480.1	2	138	159	UGAAAUUCCUGUAAAAUUCUUG	AAGGAAAUUUAUAGGAAUUUUA	Cleavage	cDNA|expressed protein
									osa-miR1866-5p	LOC_Os12g07030.1	2	1508	1531	GAGGGAUUUUGCGGGAAUUUCACG	UCCAAAAUUCCUGUAAAAUUUCUC	Cleavage	cDNA|expressed protein
									osa-miR1866-5p	LOC_Os02g43560.1	2	861	884	GAGGGAUUUUGCGGGAAUUUCACG	UCCAAAAUUCUCGUGAAAUUCCUC	Cleavage	cDNA|WRKY34, expressed
									osa-miR1876	LOC_Os07g41090.3	2	2178	2201	AUAAGUGGGUUUGUGGGCUGGCCC	UGGCUAACCCACGAAUCCACUUAU	Cleavage	cDNA|histone deacetylase, putative, expressed
									osa-miR1876	LOC_Os07g41090.1	2	2238	2261	AUAAGUGGGUUUGUGGGCUGGCCC	UGGCUAACCCACGAAUCCACUUAU	Cleavage	cDNA|histone deacetylase, putative, expressed
									osa-miR1883a	LOC_Os10g12110.1	2	46	69	ACCUGUGACGGGCCGAGAAUGGAA	UUUUCCUCUUGGCCUGUCACAGGU	Cleavage	cDNA|transposon protein, putative, CACTA, En/Spm sub-class, expressed
									osa-miR1883b	LOC_Os10g12110.1	2	46	69	ACCUGUGACGGGCCGAGAAUGGAA	UUUUCCUCUUGGCCUGUCACAGGU	Cleavage	cDNA|transposon protein, putative, CACTA, En/Spm sub-class, expressed
									osa-miR2055	LOC_Os09g39690.1	2	1217	1237	UUUCCUUGGGAAGGUGGUUUC	AUAGCCAUCUUCCCGAGGAGA	Cleavage	cDNA|protein binding protein, putative, expressed
									osa-miR2090	LOC_Os08g15312.1	2	12	33	AACUCUGAUUCUAGAAUUUUUG	GAAAGAUGUUAGAAUCAGAGUU	Cleavage	cDNA|chloroplast 50S ribosomal protein L33, putative, expressed
									osa-miR2090	LOC_Os10g21308.1	2	12	33	AACUCUGAUUCUAGAAUUUUUG	GAAAGAUGUUAGAAUCAGAGUU	Cleavage	cDNA|chloroplast 50S ribosomal protein L33, putative, expressed
									osa-miR2090	LOC_Os06g39718.1	2	12	33	AACUCUGAUUCUAGAAUUUUUG	GAAAGAUGUUAGAAUCAGAGUU	Cleavage	cDNA|chloroplast 50S ribosomal protein L33, putative, expressed
									osa-miR2090	LOC_Os04g25560.1	2	1233	1254	AACUCUGAUUCUAGAAUUUUUG	CUGAAAUUCAAGAAUUAGAGUU	Cleavage	cDNA|OsSCP23 - Putative Serine Carboxypeptidase homologue, expressed
									osa-miR2090	LOC_Os04g25560.2	2	1233	1254	AACUCUGAUUCUAGAAUUUUUG	CUGAAAUUCAAGAAUUAGAGUU	Cleavage	cDNA|OsSCP23 - Putative Serine Carboxypeptidase homologue, expressed
									osa-miR2102-5p	LOC_Os04g39190.1	2	227	246	GGGCAAGCCGCCGCCGCCAC	GCGGCGGCGGCGGCUUGCUU	Cleavage	cDNA|cell division protease ftsH homolog 4, putative, expressed
									osa-miR2102-5p	LOC_Os05g40170.1	2	648	667	GGGCAAGCCGCCGCCGCCAC	GUGGUGGUGGUGGCUUGCCU	Cleavage	cDNA|expressed protein
									osa-miR2102-5p	LOC_Os11g37660.1	2	486	505	GGGCAAGCCGCCGCCGCCAC	AUGGCGGCGGCGGCGUGCCU	Cleavage	cDNA|vegetative storage protein, putative, expressed
									osa-miR2102-5p	LOC_Os03g32610.1	2	763	782	GGGCAAGCCGCCGCCGCCAC	GUGGCGGCGGCGGCUUGGCU	Cleavage	cDNA|expressed protein
									osa-miR2102-5p	LOC_Os02g58370.1	2	1089	1108	GGGCAAGCCGCCGCCGCCAC	GCGGCGGCGGUGGCUUGCUC	Cleavage	cDNA|expressed protein
									osa-miR2102-5p	LOC_Os04g39300.1	2	377	396	GGGCAAGCCGCCGCCGCCAC	GGGGCGGCGGCGGCUUGCCA	Cleavage	cDNA|heavy metal transport/detoxification protein, putative, expressed
									osa-miR2102-5p	LOC_Os02g52670.1	2	311	330	GGGCAAGCCGCCGCCGCCAC	UUGGCGGCGGCGGCUGGCUC	Cleavage	cDNA|AP2 domain containing protein, expressed
									osa-miR2105	LOC_Os12g13170.2	2	872	891	UUGUGAUGUGAAUGAUUCAU	CAGAAUGAUUCACAUCACAA	Cleavage	cDNA|transcription factor, putative, expressed
									osa-miR2105	LOC_Os12g13170.1	2	875	894	UUGUGAUGUGAAUGAUUCAU	CAGAAUGAUUCACAUCACAA	Cleavage	cDNA|transcription factor, putative, expressed
									osa-miR2105	LOC_Os12g13170.3	2	872	891	UUGUGAUGUGAAUGAUUCAU	CAGAAUGAUUCACAUCACAA	Cleavage	cDNA|transcription factor, putative, expressed
									osa-miR2118b	LOC_Os08g42700.1	2	1456	1477	UUCCCGAUGCCUCCCAUUCCUA	GGGGAAUGGGUGGCAUUGGGAA	Cleavage	cDNA|resistance protein, putative, expressed
									osa-miR2118b	LOC_Os01g05600.1	2	584	605	UUCCCGAUGCCUCCCAUUCCUA	AGGGGAUGGGAGGCAUCGGUAA	Cleavage	cDNA|NBS-LRR disease resistance protein, putative, expressed
									osa-miR2118b	LOC_Os01g05620.1	2	587	608	UUCCCGAUGCCUCCCAUUCCUA	AGGGGAUGGGAGGCAUCGGUAA	Cleavage	cDNA|NBS-LRR disease resistance protein, putative, expressed
									osa-miR2118b	LOC_Os04g30690.1	2	749	770	UUCCCGAUGCCUCCCAUUCCUA	UUGGCAUGGGGGGCGUCGGGAA	Cleavage	cDNA|NBS type disease resistance protein, putative, expressed
									osa-miR2118b	LOC_Os04g30610.1	2	497	518	UUCCCGAUGCCUCCCAUUCCUA	UUGGCAUGGGAGGUGUCGGGAA	Cleavage	cDNA|disease resistance protein RGA2, putative, expressed
									osa-miR2118g	LOC_Os08g42700.1	2	1456	1477	UUCCUAAUGCCUCCCAUUCCUA	GGGGAAUGGGUGGCAUUGGGAA	Cleavage	cDNA|resistance protein, putative, expressed
									osa-miR2118h	LOC_Os12g26270.1	2	86	107	UUCCUGAUGCCUCUCAUUCCUA	UUGGAACCAGAGGCAUCAGGAA	Cleavage	cDNA|expressed protein
									osa-miR2118h	LOC_Os01g12240.1	2	253	274	UUCCUGAUGCCUCUCAUUCCUA	GUUGCAUGGGAGGUAUCAGGAA	Cleavage	cDNA|hypothetical protein
									osa-miR2118k	LOC_Os12g26270.1	2	86	107	UUCCUGAUGCCUCUCAUUCCUA	UUGGAACCAGAGGCAUCAGGAA	Cleavage	cDNA|expressed protein
									osa-miR2118k	LOC_Os01g12240.1	2	253	274	UUCCUGAUGCCUCUCAUUCCUA	GUUGCAUGGGAGGUAUCAGGAA	Cleavage	cDNA|hypothetical protein
									osa-miR2118n	LOC_Os08g42700.1	2	1456	1477	UUCCCGAUGCCUCCCAUUCCUA	GGGGAAUGGGUGGCAUUGGGAA	Cleavage	cDNA|resistance protein, putative, expressed
									osa-miR2118n	LOC_Os01g05600.1	2	584	605	UUCCCGAUGCCUCCCAUUCCUA	AGGGGAUGGGAGGCAUCGGUAA	Cleavage	cDNA|NBS-LRR disease resistance protein, putative, expressed
									osa-miR2118n	LOC_Os01g05620.1	2	587	608	UUCCCGAUGCCUCCCAUUCCUA	AGGGGAUGGGAGGCAUCGGUAA	Cleavage	cDNA|NBS-LRR disease resistance protein, putative, expressed
									osa-miR2118n	LOC_Os04g30690.1	2	749	770	UUCCCGAUGCCUCCCAUUCCUA	UUGGCAUGGGGGGCGUCGGGAA	Cleavage	cDNA|NBS type disease resistance protein, putative, expressed
									osa-miR2118n	LOC_Os04g30610.1	2	497	518	UUCCCGAUGCCUCCCAUUCCUA	UUGGCAUGGGAGGUGUCGGGAA	Cleavage	cDNA|disease resistance protein RGA2, putative, expressed
									osa-miR2120	LOC_Os10g05695.1	2	1263	1286	AAAGAUCUUUAGUCCCGGUUGUUC	UAGGAACCGGGACUAAAGAUUAUU	Cleavage	cDNA|retrotransposon protein, putative, unclassified, expressed
									osa-miR2120	LOC_Os08g13430.1	2	2247	2270	AAAGAUCUUUAGUCCCGGUUGUUC	UACCAAUCGGGACUAAAGAUCCUU	Cleavage	cDNA|expressed protein
									osa-miR2120	LOC_Os07g15210.1	2	59	82	AAAGAUCUUUAGUCCCGGUUGUUC	GCGGGAGUGGGGCUAAAGAUCUUU	Cleavage	cDNA|retrotransposon protein, putative, Ty3-gypsy subclass, expressed
									osa-miR2122	LOC_Os01g03440.1	2	215	236	UUUCAAAAAUAACCUUUUGUUC	CAACGGAAGGUUAUUUUUGGGA	Cleavage	cDNA|transposon protein, putative, unclassified, expressed
									osa-miR2122	LOC_Os01g56340.1	2	215	236	UUUCAAAAAUAACCUUUUGUUC	CAAUAGAAGGUUAUUUUUGGGA	Cleavage	cDNA|transposon protein, putative, unclassified, expressed
									osa-miR2122	LOC_Os03g62350.1	2	215	236	UUUCAAAAAUAACCUUUUGUUC	CAAUAGAAGGUUAUUUUUGGGA	Cleavage	cDNA|transposon protein, putative, unclassified, expressed
									osa-miR2122	LOC_Os09g16640.1	2	215	236	UUUCAAAAAUAACCUUUUGUUC	CAAUAGAAGGUUAUUUUUGGGA	Cleavage	cDNA|transposon protein, putative, unclassified, expressed
									osa-miR2122	LOC_Os01g72110.1	2	215	236	UUUCAAAAAUAACCUUUUGUUC	CAAUAGAAGGUUAUUUUUGGGA	Cleavage	cDNA|transposon protein, putative, unclassified, expressed
									osa-miR2122	ChrUn.fgenesh.mRNA.70	2	215	236	UUUCAAAAAUAACCUUUUGUUC	CAAUAGAAGGUUAUUUUUGGGA	Cleavage	cDNA|expressed protein
									osa-miR2122	LOC_Os01g74400.1	2	215	236	UUUCAAAAAUAACCUUUUGUUC	CAAUAGAAGGUUAUUUUUGGGA	Cleavage	cDNA|transposon protein, putative, unclassified, expressed
									osa-miR2122	ChrUn.fgenesh.mRNA.21	2	215	236	UUUCAAAAAUAACCUUUUGUUC	CAAUAGAAGGUUAUUUUUGGGA	Cleavage	cDNA|expressed protein
									osa-miR2122	LOC_Os12g31729.1	2	215	236	UUUCAAAAAUAACCUUUUGUUC	CAAUAGAAGGUUAUUUUUGGGA	Cleavage	cDNA|transposon protein, putative, unclassified, expressed
									osa-miR2122	LOC_Os04g25330.1	2	215	236	UUUCAAAAAUAACCUUUUGUUC	CAAUAGAAGGUUAUUUUUGGGA	Cleavage	cDNA|transposon protein, putative, unclassified, expressed
									osa-miR2122	LOC_Os10g07542.1	2	215	236	UUUCAAAAAUAACCUUUUGUUC	CAAUAGAAGGUUAUUUUUGGGA	Cleavage	cDNA|transposon protein, putative, unclassified, expressed
									osa-miR2122	LOC_Os02g06110.1	2	215	236	UUUCAAAAAUAACCUUUUGUUC	CAAUAGAAGGUUAUUUUUGGGA	Cleavage	cDNA|transposon protein, putative, unclassified, expressed
									osa-miR2122	LOC_Os06g42010.1	2	215	236	UUUCAAAAAUAACCUUUUGUUC	CAAUAGAAGGUUAUUUUUGGGA	Cleavage	cDNA|transposon protein, putative, unclassified, expressed
									osa-miR2122	LOC_Os05g08080.1	2	215	236	UUUCAAAAAUAACCUUUUGUUC	CAAUAGAAGGUUAUUUUUGGGA	Cleavage	cDNA|transposon protein, putative, unclassified, expressed
									osa-miR2122	LOC_Os03g63030.1	2	215	236	UUUCAAAAAUAACCUUUUGUUC	CAAUAGAAGGUUAUUUUUGGGA	Cleavage	cDNA|transposon protein, putative, unclassified, expressed
									osa-miR2122	LOC_Os01g46660.1	2	215	236	UUUCAAAAAUAACCUUUUGUUC	CAAUAGAAGGUUAUUUUUGGGA	Cleavage	cDNA|transposon protein, putative, unclassified, expressed
									osa-miR2122	LOC_Os01g03452.1	2	215	236	UUUCAAAAAUAACCUUUUGUUC	CAACGGAAGGUUAUUUUUGGGA	Cleavage	cDNA|transposon protein, putative, unclassified, expressed
									osa-miR2122	LOC_Os12g21510.1	2	215	236	UUUCAAAAAUAACCUUUUGUUC	CAACGGAAGGUUAUUUUUGGGA	Cleavage	cDNA|transposon protein, putative, unclassified, expressed
									osa-miR2122	LOC_Os08g39620.1	2	215	236	UUUCAAAAAUAACCUUUUGUUC	CAAUAGAAGGUUAUUUUUGGGA	Cleavage	cDNA|transposon protein, putative, unclassified, expressed
									osa-miR2122	LOC_Os11g43660.1	2	215	236	UUUCAAAAAUAACCUUUUGUUC	CAAUAGAAGGUUAUUUUUGGGA	Cleavage	cDNA|transposon protein, putative, unclassified, expressed
									osa-miR2122	LOC_Os03g19160.1	2	215	236	UUUCAAAAAUAACCUUUUGUUC	CAAUAGAAGGUUAUUUUUGGGA	Cleavage	cDNA|transposon protein, putative, unclassified, expressed
									osa-miR2122	LOC_Os01g04960.1	2	29	50	UUUCAAAAAUAACCUUUUGUUC	CAAUAGAAGGUUAUUUUUGGGA	Cleavage	cDNA|transposon protein, putative, unclassified, expressed
									osa-miR2122	LOC_Os11g47444.1	2	215	236	UUUCAAAAAUAACCUUUUGUUC	CAAUAGAAGGUUAUUUUUGGGA	Cleavage	cDNA|transposon protein, putative, unclassified, expressed
									osa-miR2122	LOC_Os04g54060.1	2	215	236	UUUCAAAAAUAACCUUUUGUUC	CAAUAGAAGGUUAUUUUUGGGA	Cleavage	cDNA|transposon protein, putative, unclassified, expressed
									osa-miR2122	LOC_Os05g38240.1	2	215	236	UUUCAAAAAUAACCUUUUGUUC	CAAUAGAAGGUUAUUUUUGGGA	Cleavage	cDNA|transposon protein, putative, unclassified, expressed
									osa-miR2122	ChrUn.fgenesh.mRNA.75	2	215	236	UUUCAAAAAUAACCUUUUGUUC	CAAUAGAAGGUUAUUUUUGGGA	Cleavage	cDNA|expressed protein
									osa-miR2122	LOC_Os07g46140.1	2	215	236	UUUCAAAAAUAACCUUUUGUUC	CAAUAGAAGGUUAUUUUUGGGA	Cleavage	cDNA|transposon protein, putative, unclassified, expressed
									osa-miR2122	LOC_Os11g17830.1	2	215	236	UUUCAAAAAUAACCUUUUGUUC	CAAUAGAAGGUUAUUUUUGGGA	Cleavage	cDNA|transposon protein, putative, unclassified, expressed
									osa-miR2122	LOC_Os06g25580.1	2	215	236	UUUCAAAAAUAACCUUUUGUUC	CAAUAGAAGGUUAUUUUUGGGA	Cleavage	cDNA|transposon protein, putative, unclassified, expressed
									osa-miR2122	LOC_Os06g14250.1	2	215	236	UUUCAAAAAUAACCUUUUGUUC	CAAUAGAAGGUUAUUUUUGGGA	Cleavage	cDNA|transposon protein, putative, unclassified, expressed
									osa-miR2122	LOC_Os04g58150.1	2	215	236	UUUCAAAAAUAACCUUUUGUUC	CAAUAGAAGGUUAUUUUUGGGA	Cleavage	cDNA|transposon protein, putative, unclassified, expressed
									osa-miR2122	LOC_Os06g14290.1	2	215	236	UUUCAAAAAUAACCUUUUGUUC	CAAUAGAAGGUUAUUUUUGGGA	Cleavage	cDNA|transposon protein, putative, unclassified, expressed
									osa-miR2122	LOC_Os07g42530.1	2	215	236	UUUCAAAAAUAACCUUUUGUUC	CAAUAGAAGGUUAUUUUUGGGA	Cleavage	cDNA|transposon protein, putative, unclassified, expressed
									osa-miR2122	LOC_Os01g47000.1	2	215	236	UUUCAAAAAUAACCUUUUGUUC	CAAUAGAAGGUUAUUUUUGGGA	Cleavage	cDNA|transposon protein, putative, unclassified, expressed
									osa-miR2122	LOC_Os07g12500.1	2	215	236	UUUCAAAAAUAACCUUUUGUUC	CAAUAGAAGGUUAUUUUUGGGA	Cleavage	cDNA|transposon protein, putative, unclassified, expressed
									osa-miR2122	LOC_Os10g30740.1	2	215	236	UUUCAAAAAUAACCUUUUGUUC	CAAUAGAAGGUUAUUUUUGGGA	Cleavage	cDNA|transposon protein, putative, unclassified, expressed
									osa-miR2122	LOC_Os11g44210.1	2	215	236	UUUCAAAAAUAACCUUUUGUUC	CAAUAGAAGGUUAUUUUUGGGA	Cleavage	cDNA|transposon protein, putative, unclassified, expressed
									osa-miR2122	LOC_Os05g08500.1	2	215	236	UUUCAAAAAUAACCUUUUGUUC	CAAUAGAAGGUUAUUUUUGGGA	Cleavage	cDNA|transposon protein, putative, unclassified, expressed
									osa-miR2122	LOC_Os08g34810.1	2	215	236	UUUCAAAAAUAACCUUUUGUUC	CAAUAGAAGGUUAUUUUUGGGA	Cleavage	cDNA|transposon protein, putative, unclassified, expressed
									osa-miR2122	LOC_Os10g42600.1	2	215	236	UUUCAAAAAUAACCUUUUGUUC	CAAUAGAAGGUUAUUUUUGGGA	Cleavage	cDNA|transposon protein, putative, unclassified, expressed
									osa-miR2122	LOC_Os02g45550.1	2	215	236	UUUCAAAAAUAACCUUUUGUUC	CAAUAGAAGGUUAUUUUUGGGA	Cleavage	cDNA|transposon protein, putative, unclassified, expressed
									osa-miR2122	LOC_Os01g73870.1	2	215	236	UUUCAAAAAUAACCUUUUGUUC	CAAUAGAAGGUUAUUUUUGGGA	Cleavage	cDNA|transposon protein, putative, unclassified, expressed
									osa-miR2122	LOC_Os02g45960.1	2	215	236	UUUCAAAAAUAACCUUUUGUUC	CAAUAGAAGGUUAUUUUUGGGA	Cleavage	cDNA|transposon protein, putative, unclassified, expressed
									osa-miR2122	LOC_Os03g46830.1	2	215	236	UUUCAAAAAUAACCUUUUGUUC	CAAUAGAAGGUUAUUUUUGGGA	Cleavage	cDNA|transposon protein, putative, unclassified, expressed
									osa-miR2122	LOC_Os06g50320.1	2	215	236	UUUCAAAAAUAACCUUUUGUUC	CAAUAGAAGGUUAUUUUUGGGA	Cleavage	cDNA|transposon protein, putative, unclassified, expressed
									osa-miR2122	LOC_Os12g42270.1	2	215	236	UUUCAAAAAUAACCUUUUGUUC	CAAUAGAAGGUUAUUUUUGGGA	Cleavage	cDNA|transposon protein, putative, unclassified, expressed
									osa-miR2122	LOC_Os07g26120.1	2	215	236	UUUCAAAAAUAACCUUUUGUUC	CAAUAGAAGGUUAUUUUUGGGA	Cleavage	cDNA|transposon protein, putative, unclassified, expressed
									osa-miR2122	LOC_Os07g18060.1	2	215	236	UUUCAAAAAUAACCUUUUGUUC	CAAUAGAAGGUUAUUUUUGGGA	Cleavage	cDNA|transposon protein, putative, unclassified, expressed
									osa-miR2122	LOC_Os07g40650.1	2	215	236	UUUCAAAAAUAACCUUUUGUUC	CAAUAGAAGGUUAUUUUUGGGA	Cleavage	cDNA|transposon protein, putative, unclassified, expressed
									osa-miR2122	LOC_Os09g32390.1	2	215	236	UUUCAAAAAUAACCUUUUGUUC	CAAUAGAAGGUUAUUUUUGGGA	Cleavage	cDNA|transposon protein, putative, unclassified, expressed
									osa-miR2122	LOC_Os09g30370.1	2	215	236	UUUCAAAAAUAACCUUUUGUUC	CAAUAGAAGGUUAUUUUUGGGA	Cleavage	cDNA|transposon protein, putative, unclassified, expressed
									osa-miR2122	LOC_Os06g36470.1	2	215	236	UUUCAAAAAUAACCUUUUGUUC	CAAUAGAAGGUUAUUUUUGGGA	Cleavage	cDNA|transposon protein, putative, unclassified, expressed
									osa-miR2122	LOC_Os02g04200.1	2	215	236	UUUCAAAAAUAACCUUUUGUUC	CAAUAGAAGGUUAUUUUUGGGA	Cleavage	cDNA|transposon protein, putative, unclassified, expressed
									osa-miR2122	LOC_Os06g04770.1	2	215	236	UUUCAAAAAUAACCUUUUGUUC	CAAUAGAAGGUUAUUUUUGGGA	Cleavage	cDNA|transposon protein, putative, unclassified, expressed
									osa-miR2122	LOC_Os11g43060.1	2	215	236	UUUCAAAAAUAACCUUUUGUUC	CAAUAGAAGGUUAUUUUUGGGA	Cleavage	cDNA|transposon protein, putative, unclassified, expressed
									osa-miR2122	LOC_Os11g44240.1	2	215	236	UUUCAAAAAUAACCUUUUGUUC	CAAUAGAAGGUUAUUUUUGGGA	Cleavage	cDNA|transposon protein, putative, unclassified, expressed
									osa-miR2122	LOC_Os01g71890.1	2	215	236	UUUCAAAAAUAACCUUUUGUUC	CAAUAGAAGGUUAUUUUUGGGA	Cleavage	cDNA|transposon protein, putative, unclassified, expressed
									osa-miR2122	LOC_Os03g05360.1	2	29	50	UUUCAAAAAUAACCUUUUGUUC	CAAUAGAAGGUUAUUUUUGGGA	Cleavage	cDNA|transposon protein, putative, unclassified, expressed
									osa-miR2122	LOC_Os08g07940.1	2	1326	1347	UUUCAAAAAUAACCUUUUGUUC	CUCCAAAAGGUUGUUUUUAAAA	Cleavage	cDNA|disease resistance protein RPM1, putative, expressed
									osa-miR2275c	LOC_Os11g30620.1	2	1819	1841	AGAAUUGGAGGAAAACAAACUGA	CAGGUUUUUUUUCUUUCAAUUCU	Cleavage	cDNA|expressed protein
									osa-miR2275c	LOC_Os05g31530.1	2	1304	1326	AGAAUUGGAGGAAAACAAACUGA	UCUUUUUUUUUUCUUCUAAUUCU	Cleavage	cDNA|disease resistance protein RGA4, putative, expressed
									osa-miR2275d	LOC_Os09g17630.1	2	1050	1071	CUUGUUUUUCUCCAAUAUCUCA	UUGGAUAUUGAAGAGAAACAAG	Cleavage	cDNA|receptor-like protein kinase 2, putative, expressed
									osa-miR2275d	LOC_Os06g37570.1	2	607	628	CUUGUUUUUCUCCAAUAUCUCA	CUUGGUGUUGGAGAAAGACGAG	Cleavage	cDNA|expressed protein
									osa-miR2275d	LOC_Os05g31860.1	2	771	792	CUUGUUUUUCUCCAAUAUCUCA	ACUGGCAUUGGAGAAAAGCAAG	Cleavage	cDNA|retrotransposon protein, putative, unclassified, expressed
									osa-miR2863c	LOC_Os09g35920.1	2	1050	1073	UUAGUAGGACUAGAAUGGGCCAAA	AUUUCCUCAUUCUGGUCCUACUGG	Cleavage	cDNA|mediator of RNA polymerase II transcription subunit 10, putative, expressed
									osa-miR2864.1	LOC_Os09g07154.1	2	267	287	UUUUGCUGCCCUUGUUUUGCA	UGCAAAACAAGGACAGCAAGA	Cleavage	cDNA|expressed protein
									osa-miR2864.1	LOC_Os03g55040.1	2	1616	1636	UUUUGCUGCCCUUGUUUUGCA	AUCAAGGCGAGGGCAGCAAAG	Cleavage	cDNA|UDP-glucoronosyl and UDP-glucosyl transferase domain containing protein, expressed
									osa-miR2864.2	LOC_Os05g25974.2	2	1483	1503	UUGUUUUGCAUUGUAUAGGUA	CCCCAGUACAAUGUAAAACAA	Cleavage	cDNA|expressed protein
									osa-miR2864.2	LOC_Os05g25974.1	2	1471	1491	UUGUUUUGCAUUGUAUAGGUA	CCCCAGUACAAUGUAAAACAA	Cleavage	cDNA|expressed protein
									osa-miR2868	LOC_Os08g24900.1	2	12	31	UUGGUUUUGUGUAGUAGAAA	UUUGUGCUAUACAAAACCAA	Cleavage	cDNA|retrotransposon protein, putative, unclassified, expressed
									osa-miR2873c	LOC_Os07g33480.4	2	885	905	CAAAUGAAGUUGAGUUUGGAC	GUCCAAAAUCAACUUCAUUUU	Cleavage	cDNA|cytochrome P450 domain containing protein, expressed
									osa-miR2876-5p	LOC_Os07g12540.1	2	31	51	AAUUGCUGGCAGCACUGUUUA	AUAACCAUGCUGCCAGCAAUU	Cleavage	cDNA|expressed protein
									osa-miR2878-3p	LOC_Os04g49420.1	2	911	934	CAGGAUUUUAUACAUGUAAAGAAU	UCACAUUACAUGUAUAAAGUCUUA	Cleavage	cDNA|Core histone H2A/H2B/H3/H4 domain containing protein, putative, expressed
									osa-miR2919	LOC_Os06g24310.1	2	3485	3503	AAGGGGGGGGGGGGAAAGA	UUUUUCCCCCCCCCCCUUC	Cleavage	cDNA|retrotransposon protein, putative, unclassified, expressed
									osa-miR2919	LOC_Os01g71620.1	2	360	378	AAGGGGGGGGGGGGAAAGA	UCUUUUCCCCCUCUCCUUU	Cleavage	cDNA|expressed protein
									osa-miR2919	LOC_Os11g06910.3	2	256	274	AAGGGGGGGGGGGGAAAGA	UUUUUCCCUCCUCCUCCUU	Cleavage	cDNA|myosin heavy chain-related, putative, expressed
									osa-miR2919	LOC_Os11g06910.2	2	256	274	AAGGGGGGGGGGGGAAAGA	UUUUUCCCUCCUCCUCCUU	Cleavage	cDNA|myosin heavy chain-related, putative, expressed
									osa-miR2919	LOC_Os11g06910.1	2	256	274	AAGGGGGGGGGGGGAAAGA	UUUUUCCCUCCUCCUCCUU	Cleavage	cDNA|myosin heavy chain-related, putative, expressed
									osa-miR2919	LOC_Os01g72834.1	2	181	199	AAGGGGGGGGGGGGAAAGA	UCUUUCCUCCUCCUCCUUU	Cleavage	cDNA|RNA recognition motif containing protein, putative, expressed
									osa-miR2919	LOC_Os04g35560.2	2	494	512	AAGGGGGGGGGGGGAAAGA	UCUUUUCCCCCCCUUUCUU	Cleavage	cDNA|glutathione S-transferase, putative, expressed
									osa-miR2919	LOC_Os03g22259.1	2	16	34	AAGGGGGGGGGGGGAAAGA	UCUUUCCUCCUCUCCUCUU	Cleavage	cDNA|expressed protein
									osa-miR2919	LOC_Os02g12870.3	2	45	63	AAGGGGGGGGGGGGAAAGA	UUUUUUCCCCCUCCUCCUU	Cleavage	cDNA|expressed protein
									osa-miR2919	LOC_Os10g34795.1	2	14	32	AAGGGGGGGGGGGGAAAGA	UCUUUCCUCCUCUCCUCUU	Cleavage	cDNA|expressed protein
									osa-miR2919	LOC_Os03g24810.1	2	46	64	AAGGGGGGGGGGGGAAAGA	UCUUUCUCUCCCCCUUCUU	Cleavage	cDNA|expressed protein
									osa-miR2919	LOC_Os01g21340.1	2	40	58	AAGGGGGGGGGGGGAAAGA	UCUUUCUCUCUCUCCCCUU	Cleavage	cDNA|expressed protein
									osa-miR2919	LOC_Os08g02900.1	2	52	70	AAGGGGGGGGGGGGAAAGA	UCUUCCCCCCCCCCCCCUC	Cleavage	cDNA|expressed protein
									osa-miR2919	LOC_Os06g43560.1	2	101	119	AAGGGGGGGGGGGGAAAGA	UCUUACUCCCCCUCCCCUU	Cleavage	cDNA|phox domain-containing protein, putative, expressed
									osa-miR2919	LOC_Os03g61220.1	2	43	61	AAGGGGGGGGGGGGAAAGA	UCUCUCCCCCCUCCUCCUU	Cleavage	cDNA|DEAD-box ATP-dependent RNA helicase 3, putative, expressed
									osa-miR2919	LOC_Os03g61220.2	2	43	61	AAGGGGGGGGGGGGAAAGA	UCUCUCCCCCCUCCUCCUU	Cleavage	cDNA|DEAD-box ATP-dependent RNA helicase 3, putative, expressed
									osa-miR2919	LOC_Os10g20310.1	2	370	388	AAGGGGGGGGGGGGAAAGA	UCUUGCCCCUCCCCUCCUU	Cleavage	cDNA|thioredoxin fold, putative, expressed
									osa-miR2919	LOC_Os10g20310.2	2	362	380	AAGGGGGGGGGGGGAAAGA	UCUUGCCCCUCCCCUCCUU	Cleavage	cDNA|thioredoxin fold, putative, expressed
									osa-miR2919	LOC_Os10g20310.3	2	362	380	AAGGGGGGGGGGGGAAAGA	UCUUGCCCCUCCCCUCCUU	Cleavage	cDNA|thioredoxin fold, putative, expressed
									osa-miR2919	LOC_Os01g73090.1	2	60	78	AAGGGGGGGGGGGGAAAGA	UUUUGCCCCCUCCCCCCUU	Cleavage	cDNA|expressed protein
									osa-miR2919	LOC_Os06g24310.1	2	3485	3503	AAGGGGGGGGGGGGAAAGA	UUUUUCCCCCCCCCCCUUC	Cleavage	cDNA|retrotransposon protein, putative, unclassified, expressed
									osa-miR2919	LOC_Os01g71620.1	2	360	378	AAGGGGGGGGGGGGAAAGA	UCUUUUCCCCCUCUCCUUU	Cleavage	cDNA|expressed protein
									osa-miR2919	LOC_Os11g06910.3	2	256	274	AAGGGGGGGGGGGGAAAGA	UUUUUCCCUCCUCCUCCUU	Cleavage	cDNA|myosin heavy chain-related, putative, expressed
									osa-miR2919	LOC_Os11g06910.2	2	256	274	AAGGGGGGGGGGGGAAAGA	UUUUUCCCUCCUCCUCCUU	Cleavage	cDNA|myosin heavy chain-related, putative, expressed
									osa-miR2919	LOC_Os11g06910.1	2	256	274	AAGGGGGGGGGGGGAAAGA	UUUUUCCCUCCUCCUCCUU	Cleavage	cDNA|myosin heavy chain-related, putative, expressed
									osa-miR2919	LOC_Os01g72834.1	2	181	199	AAGGGGGGGGGGGGAAAGA	UCUUUCCUCCUCCUCCUUU	Cleavage	cDNA|RNA recognition motif containing protein, putative, expressed
									osa-miR2919	LOC_Os04g35560.2	2	494	512	AAGGGGGGGGGGGGAAAGA	UCUUUUCCCCCCCUUUCUU	Cleavage	cDNA|glutathione S-transferase, putative, expressed
									osa-miR2919	LOC_Os03g22259.1	2	16	34	AAGGGGGGGGGGGGAAAGA	UCUUUCCUCCUCUCCUCUU	Cleavage	cDNA|expressed protein
									osa-miR2919	LOC_Os02g12870.3	2	45	63	AAGGGGGGGGGGGGAAAGA	UUUUUUCCCCCUCCUCCUU	Cleavage	cDNA|expressed protein
									osa-miR2919	LOC_Os10g34795.1	2	14	32	AAGGGGGGGGGGGGAAAGA	UCUUUCCUCCUCUCCUCUU	Cleavage	cDNA|expressed protein
									osa-miR2919	LOC_Os03g24810.1	2	46	64	AAGGGGGGGGGGGGAAAGA	UCUUUCUCUCCCCCUUCUU	Cleavage	cDNA|expressed protein
									osa-miR2919	LOC_Os01g21340.1	2	40	58	AAGGGGGGGGGGGGAAAGA	UCUUUCUCUCUCUCCCCUU	Cleavage	cDNA|expressed protein
									osa-miR2919	LOC_Os08g02900.1	2	52	70	AAGGGGGGGGGGGGAAAGA	UCUUCCCCCCCCCCCCCUC	Cleavage	cDNA|expressed protein
									osa-miR2919	LOC_Os06g43560.1	2	101	119	AAGGGGGGGGGGGGAAAGA	UCUUACUCCCCCUCCCCUU	Cleavage	cDNA|phox domain-containing protein, putative, expressed
									osa-miR2919	LOC_Os03g61220.1	2	43	61	AAGGGGGGGGGGGGAAAGA	UCUCUCCCCCCUCCUCCUU	Cleavage	cDNA|DEAD-box ATP-dependent RNA helicase 3, putative, expressed
									osa-miR2919	LOC_Os03g61220.2	2	43	61	AAGGGGGGGGGGGGAAAGA	UCUCUCCCCCCUCCUCCUU	Cleavage	cDNA|DEAD-box ATP-dependent RNA helicase 3, putative, expressed
									osa-miR2919	LOC_Os10g20310.1	2	370	388	AAGGGGGGGGGGGGAAAGA	UCUUGCCCCUCCCCUCCUU	Cleavage	cDNA|thioredoxin fold, putative, expressed
									osa-miR2919	LOC_Os10g20310.2	2	362	380	AAGGGGGGGGGGGGAAAGA	UCUUGCCCCUCCCCUCCUU	Cleavage	cDNA|thioredoxin fold, putative, expressed
									osa-miR2919	LOC_Os10g20310.3	2	362	380	AAGGGGGGGGGGGGAAAGA	UCUUGCCCCUCCCCUCCUU	Cleavage	cDNA|thioredoxin fold, putative, expressed
									osa-miR2919	LOC_Os01g73090.1	2	60	78	AAGGGGGGGGGGGGAAAGA	UUUUGCCCCCUCCCCCCUU	Cleavage	cDNA|expressed protein
									osa-miR2923	LOC_Os11g45190.1	2	3664	3685	AGACAAAAAUAUAAAUAACAAA	CCUGUAAUCUAUAUUUUUGUCU	Cleavage	cDNA|NB-ARC domain containing protein, expressed
									osa-miR2925	LOC_Os08g33320.1	2	1690	1708	UGGCGGCCGCGGGCUUCGU	ACGAAGCCUGUGGUUGCCA	Cleavage	cDNA|expressed protein
									osa-miR2925	LOC_Os03g44890.1	2	1006	1024	UGGCGGCCGCGGGCUUCGU	AUGGAGCUCGCGGCCGCCG	Cleavage	cDNA|anthranilate phosphoribosyltransferase, putative, expressed
									osa-miR2925	LOC_Os06g47520.1	2	920	938	UGGCGGCCGCGGGCUUCGU	ACGAGGUUCGCGGCCGCCG	Cleavage	cDNA|expressed protein
									osa-miR2925	LOC_Os03g18840.1	2	87	105	UGGCGGCCGCGGGCUUCGU	AUGGCGCCCGCGGCCGCCA	Cleavage	cDNA|NUC189 domain containing protein, expressed
									osa-miR2925	LOC_Os08g39200.1	2	153	171	UGGCGGCCGCGGGCUUCGU	GCGAGGCUCGCGGCCGCCG	Cleavage	cDNA|expressed protein
									osa-miR2926	LOC_Os02g20360.2	2	315	334	AGGUCGUCGACGUUGGUGCU	AGCGCCAGCGUCGACGACCG	Cleavage	cDNA|tyrosine aminotransferase, putative, expressed
									osa-miR2926	LOC_Os02g20360.1	2	315	334	AGGUCGUCGACGUUGGUGCU	AGCGCCAGCGUCGACGACCG	Cleavage	cDNA|tyrosine aminotransferase, putative, expressed
									osa-miR2926	LOC_Os08g16660.1	2	1037	1056	AGGUCGUCGACGUUGGUGCU	GGCGCCAGCGUCGACGGCUU	Cleavage	cDNA|aspartic proteinase nepenthesin precursor, putative, expressed
									osa-miR2926	LOC_Os01g16460.1	2	130	149	AGGUCGUCGACGUUGGUGCU	GGCUCCAACGUCGACGACCG	Cleavage	cDNA|expressed protein
									osa-miR2926	LOC_Os09g07700.1	2	85	104	AGGUCGUCGACGUUGGUGCU	CGCGGCAACGUCGGCGACCU	Cleavage	cDNA|expressed protein
									osa-miR2927	LOC_Os02g46970.1	2	1621	1643	UGUCGUCGUCGAUGGAGCCCAUG	CAUCGGCUACGUCGACGACGACG	Cleavage	cDNA|AMP-binding domain containing protein, expressed
									osa-miR2927	LOC_Os08g14760.1	2	1370	1392	UGUCGUCGUCGAUGGAGCCCAUG	CAUCGGCUACGUCGACGACGACG	Cleavage	cDNA|AMP-binding domain containing protein, expressed
									osa-miR2927	LOC_Os11g11790.1	2	191	213	UGUCGUCGUCGAUGGAGCCCAUG	CGUCGGCGCCAUCGACGACGACC	Cleavage	cDNA|NBS-LRR type disease resistance protein, putative, expressed
									osa-miR2927	LOC_Os11g11790.1	2	423	445	UGUCGUCGUCGAUGGAGCCCAUG	CGUCGGCGCCAUCGACGACGACC	Cleavage	cDNA|NBS-LRR type disease resistance protein, putative, expressed
									osa-miR2927	LOC_Os02g58610.1	2	633	655	UGUCGUCGUCGAUGGAGCCCAUG	GCUGGGCCCCGUCGGCGACGACA	Cleavage	cDNA|protein kinase, putative, expressed
									osa-miR2927	LOC_Os06g41690.1	2	1902	1924	UGUCGUCGUCGAUGGAGCCCAUG	CAACGGCUCCAUCGCCGGCGACA	Cleavage	cDNA|retrotransposon protein, putative, unclassified, expressed
									osa-miR2927	LOC_Os01g16850.1	2	588	610	UGUCGUCGUCGAUGGAGCCCAUG	CAACGGCUCCAUCGCCGGCGACA	Cleavage	cDNA|retrotransposon protein, putative, unclassified, expressed
									osa-miR2927	LOC_Os06g06802.1	2	1149	1171	UGUCGUCGUCGAUGGAGCCCAUG	CAACGGCUCCAUCGCCGGCGACA	Cleavage	cDNA|retrotransposon protein, putative, unclassified, expressed
									osa-miR2927	LOC_Os08g15010.1	2	240	262	UGUCGUCGUCGAUGGAGCCCAUG	CAACGGCUCCAUCGCCGGCGACA	Cleavage	cDNA|retrotransposon protein, putative, unclassified, expressed
									osa-miR2927	LOC_Os07g17260.1	2	1648	1670	UGUCGUCGUCGAUGGAGCCCAUG	CAACGGCUCCAUCGCCGGCGACA	Cleavage	cDNA|retrotransposon protein, putative, unclassified, expressed
									osa-miR2927	LOC_Os12g10900.1	2	876	898	UGUCGUCGUCGAUGGAGCCCAUG	CAACGGCUCCAUCGCCGGCGACA	Cleavage	cDNA|retrotransposon protein, putative, unclassified, expressed
									osa-miR2927	LOC_Os07g17260.2	2	1505	1527	UGUCGUCGUCGAUGGAGCCCAUG	CAACGGCUCCAUCGCCGGCGACA	Cleavage	cDNA|retrotransposon protein, putative, unclassified, expressed
									osa-miR2927	LOC_Os02g20200.1	2	240	262	UGUCGUCGUCGAUGGAGCCCAUG	CAACGGCUCCAUCGCCGGCGACA	Cleavage	cDNA|retrotransposon protein, putative, unclassified, expressed
									osa-miR2927	LOC_Os07g18970.1	2	240	262	UGUCGUCGUCGAUGGAGCCCAUG	CAACGGCUCCAUCGCCGGCGACA	Cleavage	cDNA|retrotransposon protein, putative, unclassified, expressed
									osa-miR2927	LOC_Os09g14500.1	2	240	262	UGUCGUCGUCGAUGGAGCCCAUG	CAACGGCUCCAUCGCCGGCGACA	Cleavage	cDNA|retrotransposon protein, putative, unclassified, expressed
									osa-miR2927	LOC_Os04g35870.1	2	240	262	UGUCGUCGUCGAUGGAGCCCAUG	CAACGGCUCCAUCGCCGGCGACA	Cleavage	cDNA|retrotransposon protein, putative, unclassified, expressed
									osa-miR2927	LOC_Os06g05680.1	2	240	262	UGUCGUCGUCGAUGGAGCCCAUG	CAACGGCUCCAUCGCCGGCGACA	Cleavage	cDNA|retrotransposon protein, putative, unclassified, expressed
									osa-miR2927	LOC_Os12g40060.1	2	240	262	UGUCGUCGUCGAUGGAGCCCAUG	CAACGGCUCCAUCGCCGGCGACA	Cleavage	cDNA|retrotransposon protein, putative, unclassified, expressed
									osa-miR2927	LOC_Os11g44190.1	2	240	262	UGUCGUCGUCGAUGGAGCCCAUG	CAACGGCUCCAUCGCCGGCGACA	Cleavage	cDNA|retrotransposon protein, putative, unclassified, expressed
									osa-miR2927	LOC_Os08g24410.1	2	333	355	UGUCGUCGUCGAUGGAGCCCAUG	CAACGGCUCCAUCGCCGGCGACA	Cleavage	cDNA|retrotransposon protein, putative, unclassified, expressed
									osa-miR2927	LOC_Os03g17300.2	2	1570	1592	UGUCGUCGUCGAUGGAGCCCAUG	CACCGGCUCCAUCGACGGCGCCA	Cleavage	cDNA|TKL_IRAK_CrRLK1L-1.7 - The CrRLK1L-1 subfamily has homology to the CrRLK1L homolog, expressed
									osa-miR2927	LOC_Os04g41520.1	2	234	256	UGUCGUCGUCGAUGGAGCCCAUG	CAACGGCUCCAUCGCCGGCGACA	Cleavage	cDNA|retrotransposon protein, putative, unclassified, expressed
									osa-miR2927	LOC_Os03g17300.4	2	1570	1592	UGUCGUCGUCGAUGGAGCCCAUG	CACCGGCUCCAUCGACGGCGCCA	Cleavage	cDNA|TKL_IRAK_CrRLK1L-1.7 - The CrRLK1L-1 subfamily has homology to the CrRLK1L homolog, expressed
									osa-miR2927	LOC_Os03g17300.3	2	1570	1592	UGUCGUCGUCGAUGGAGCCCAUG	CACCGGCUCCAUCGACGGCGCCA	Cleavage	cDNA|TKL_IRAK_CrRLK1L-1.7 - The CrRLK1L-1 subfamily has homology to the CrRLK1L homolog, expressed
									osa-miR2927	LOC_Os03g17300.1	2	1570	1592	UGUCGUCGUCGAUGGAGCCCAUG	CACCGGCUCCAUCGACGGCGCCA	Cleavage	cDNA|TKL_IRAK_CrRLK1L-1.7 - The CrRLK1L-1 subfamily has homology to the CrRLK1L homolog, expressed
									osa-miR2927	LOC_Os01g50090.1	2	240	262	UGUCGUCGUCGAUGGAGCCCAUG	CAACGGCUCCAUCGCCGGCGACA	Cleavage	cDNA|retrotransposon protein, putative, unclassified, expressed
									osa-miR2927	LOC_Os09g15570.1	2	1179	1201	UGUCGUCGUCGAUGGAGCCCAUG	GGGGGGCGCCAUCGACGACGGCG	Cleavage	cDNA|OsFBX315 - F-box domain containing protein, expressed
									osa-miR2927	LOC_Os09g15570.1	2	1389	1411	UGUCGUCGUCGAUGGAGCCCAUG	CUUCCGCUUCAUCGACGGCGACA	Cleavage	cDNA|OsFBX315 - F-box domain containing protein, expressed
									osa-miR2927	LOC_Os04g56460.1	2	930	952	UGUCGUCGUCGAUGGAGCCCAUG	GUGCCGCUUCAUCGGCGACGACA	Cleavage	cDNA|MBTB9 - Bric-a-Brac, Tramtrack, Broad Complex BTB domain with Meprin and TRAF Homology MATH domain, expressed
									osa-miR2927	LOC_Os10g12780.1	2	234	256	UGUCGUCGUCGAUGGAGCCCAUG	CAACGGCUCCAUCGCCGGCGACA	Cleavage	cDNA|retrotransposon protein, putative, unclassified, expressed
									osa-miR2927	LOC_Os06g39370.1	2	1158	1180	UGUCGUCGUCGAUGGAGCCCAUG	AGAAGGCUUCGUCGACGACGGCG	Cleavage	cDNA|OsFBK16 - F-box domain and kelch repeat containing protein, expressed
									osa-miR2927	LOC_Os03g48320.1	2	2632	2654	UGUCGUCGUCGAUGGAGCCCAUG	GCAACGCACCAUCGACGACGACA	Cleavage	cDNA|disease resistance RPP13-like protein 1, putative, expressed
									osa-miR2927	LOC_Os10g25080.1	2	5046	5068	UGUCGUCGUCGAUGGAGCCCAUG	GUGCGUCUCUAUCGACGACGGCA	Cleavage	cDNA|retrotransposon protein, putative, Ty3-gypsy subclass, expressed
									osa-miR2927	LOC_Os05g34260.1	2	303	325	UGUCGUCGUCGAUGGAGCCCAUG	CGGCGGCUCGGUCGACGACGGCA	Cleavage	cDNA|transposon protein, putative, Ac/Ds sub-class, expressed
									osa-miR395a	LOC_Os10g35870.1	2	652	672	GUGAAGUGCUUGGGGGAACUC	AUGGUGCCCCAAGCACUUCAC	Cleavage	cDNA|cytochrome b5-like Heme/Steroid binding domain containing protein, expressed
									osa-miR395b	LOC_Os03g09930.1	2	111	131	GUGAAGUGUUUGGGGGAACUC	GAGUUCACCCAAACACUUCAG	Cleavage	cDNA|sulfate transporter, putative, expressed
									osa-miR395d	LOC_Os03g09930.1	2	111	131	GUGAAGUGUUUGGGGGAACUC	GAGUUCACCCAAACACUUCAG	Cleavage	cDNA|sulfate transporter, putative, expressed
									osa-miR395e	LOC_Os03g09930.1	2	111	131	GUGAAGUGUUUGGGGGAACUC	GAGUUCACCCAAACACUUCAG	Cleavage	cDNA|sulfate transporter, putative, expressed
									osa-miR395f	LOC_Os12g40480.2	2	1786	1806	GUGAAUUGUUUGGGGGAACUC	GUGUUCCCCCAAAAAAUUCAU	Cleavage	cDNA|H-BTB9 - Bric-a-Brac, Tramtrack, Broad Complex BTB domain with H family conserved sequence, expressed
									osa-miR395g	LOC_Os03g09930.1	2	111	131	GUGAAGUGUUUGGGGGAACUC	GAGUUCACCCAAACACUUCAG	Cleavage	cDNA|sulfate transporter, putative, expressed
									osa-miR395h	LOC_Os03g09930.1	2	111	131	GUGAAGUGUUUGGGGGAACUC	GAGUUCACCCAAACACUUCAG	Cleavage	cDNA|sulfate transporter, putative, expressed
									osa-miR395i	LOC_Os03g09930.1	2	111	131	GUGAAGUGUUUGGGGGAACUC	GAGUUCACCCAAACACUUCAG	Cleavage	cDNA|sulfate transporter, putative, expressed
									osa-miR395j	LOC_Os03g09930.1	2	111	131	GUGAAGUGUUUGGGGGAACUC	GAGUUCACCCAAACACUUCAG	Cleavage	cDNA|sulfate transporter, putative, expressed
									osa-miR395k	LOC_Os03g09930.1	2	111	131	GUGAAGUGUUUGGGGGAACUC	GAGUUCACCCAAACACUUCAG	Cleavage	cDNA|sulfate transporter, putative, expressed
									osa-miR395l	LOC_Os03g09930.1	2	111	131	GUGAAGUGUUUGGGGGAACUC	GAGUUCACCCAAACACUUCAG	Cleavage	cDNA|sulfate transporter, putative, expressed
									osa-miR395m	LOC_Os03g09930.1	2	111	131	GUGAAGUGUUUGGGGGAACUC	GAGUUCACCCAAACACUUCAG	Cleavage	cDNA|sulfate transporter, putative, expressed
									osa-miR395n	LOC_Os03g09930.1	2	111	131	GUGAAGUGUUUGGGGGAACUC	GAGUUCACCCAAACACUUCAG	Cleavage	cDNA|sulfate transporter, putative, expressed
									osa-miR395p	LOC_Os03g09930.1	2	111	131	GUGAAGUGUUUGGGGGAACUC	GAGUUCACCCAAACACUUCAG	Cleavage	cDNA|sulfate transporter, putative, expressed
									osa-miR395q	LOC_Os03g09930.1	2	111	131	GUGAAGUGUUUGGGGGAACUC	GAGUUCACCCAAACACUUCAG	Cleavage	cDNA|sulfate transporter, putative, expressed
									osa-miR395r	LOC_Os03g09930.1	2	111	131	GUGAAGUGUUUGGGGGAACUC	GAGUUCACCCAAACACUUCAG	Cleavage	cDNA|sulfate transporter, putative, expressed
									osa-miR395s	LOC_Os03g09930.1	2	111	131	GUGAAGUGUUUGGGGGAACUC	GAGUUCACCCAAACACUUCAG	Cleavage	cDNA|sulfate transporter, putative, expressed
									osa-miR395x	LOC_Os06g46480.1	2	1104	1124	GUGAAGUGUUUGGAGUAGCUC	CAGUUACUCCAAGCACUUCAG	Cleavage	cDNA|expressed protein
									osa-miR395x	LOC_Os04g52460.1	2	1454	1474	GUGAAGUGUUUGGAGUAGCUC	GCACUACUCCAGACACUUCAU	Cleavage	cDNA|retrotransposon protein, putative, unclassified, expressed
									osa-miR395x	LOC_Os05g50624.1	2	2028	2048	GUGAAGUGUUUGGAGUAGCUC	CGGCUUCUCCAAGCACUUCGC	Cleavage	cDNA|transposon protein, putative, unclassified, expressed
									osa-miR395x	LOC_Os06g46480.1	2	1104	1124	GUGAAGUGUUUGGAGUAGCUC	CAGUUACUCCAAGCACUUCAG	Cleavage	cDNA|expressed protein
									osa-miR395x	LOC_Os04g52460.1	2	1454	1474	GUGAAGUGUUUGGAGUAGCUC	GCACUACUCCAGACACUUCAU	Cleavage	cDNA|retrotransposon protein, putative, unclassified, expressed
									osa-miR395x	LOC_Os05g50624.1	2	2028	2048	GUGAAGUGUUUGGAGUAGCUC	CGGCUUCUCCAAGCACUUCGC	Cleavage	cDNA|transposon protein, putative, unclassified, expressed
									osa-miR395y	LOC_Os03g09930.1	2	111	131	GUGAAGUGUUUGGGGGAACUC	GAGUUCACCCAAACACUUCAG	Cleavage	cDNA|sulfate transporter, putative, expressed
									osa-miR396a-5p	LOC_Os04g57050.1	2	853	873	UUCCACAGCUUUCUUGAACUG	GAGUUCAAGGAGGCUGUGGAC	Cleavage	cDNA|jasmonate O-methyltransferase, putative, expressed
									osa-miR396b-5p	LOC_Os04g57050.1	2	853	873	UUCCACAGCUUUCUUGAACUG	GAGUUCAAGGAGGCUGUGGAC	Cleavage	cDNA|jasmonate O-methyltransferase, putative, expressed
									osa-miR396c-5p	LOC_Os04g57050.1	2	853	873	UUCCACAGCUUUCUUGAACUU	GAGUUCAAGGAGGCUGUGGAC	Cleavage	cDNA|jasmonate O-methyltransferase, putative, expressed
									osa-miR3979-3p	LOC_Os08g05640.2	2	74	93	CUUCGGGGGAGGAGAGAAGC	CCUUCUCUCCUUCCCCGGAA	Cleavage	cDNA|DUF1336 domain containing protein, expressed
									osa-miR3979-3p	LOC_Os03g44780.1	2	666	685	CUUCGGGGGAGGAGAGAAGC	CCUCCUCUCCUCCCUCGAGG	Cleavage	cDNA|elongation factor Tu family protein, putative, expressed
									osa-miR397a	LOC_Os03g16610.1	2	781	801	UCAUUGAGUGCAGCGUUGAUG	GAUCAACGCUGCGCUCAACGA	Cleavage	cDNA|laccase precursor protein, putative, expressed
									osa-miR397a	LOC_Os10g04900.2	2	671	691	UCAUUGAGUGCAGCGUUGAUG	UGUCAUCGUUGCAUUCAAUGA	Cleavage	cDNA|OsFBX364 - F-box domain containing protein, expressed
									osa-miR397a	LOC_Os10g04900.1	2	671	691	UCAUUGAGUGCAGCGUUGAUG	UGUCAUCGUUGCAUUCAAUGA	Cleavage	cDNA|OsFBX364 - F-box domain containing protein, expressed
									osa-miR397b	LOC_Os05g38410.1	2	747	767	UUAUUGAGUGCAGCGUUGAUG	CAUCAACGCUGCACUCAACGA	Cleavage	cDNA|laccase precursor protein, putative, expressed
									osa-miR397b	LOC_Os05g38420.1	2	747	767	UUAUUGAGUGCAGCGUUGAUG	CAUCAACGCUGCACUCAACGA	Cleavage	cDNA|laccase precursor protein, putative, expressed
									osa-miR397b	LOC_Os11g48060.1	2	1180	1200	UUAUUGAGUGCAGCGUUGAUG	CAUCAACGCUGCACUGAAUGA	Cleavage	cDNA|laccase-22 precursor, putative, expressed
									osa-miR3980a-3p	LOC_Os11g06934.2	2	2511	2531	CUGGCCGAGGCCGUCGAUUCU	GGAAUCGAUGGUCUCGGCCAU	Cleavage	cDNA|expressed protein
									osa-miR3980a-3p	LOC_Os11g03160.1	2	131	151	CUGGCCGAGGCCGUCGAUUCU	GCAAUCGGCGGCCACGGCCAG	Cleavage	cDNA|glycosyl transferase, family 8, putative, expressed
									osa-miR3980a-3p	LOC_Os08g34900.1	2	602	622	CUGGCCGAGGCCGUCGAUUCU	CUCACCGACGGCCUCGGCCAG	Cleavage	cDNA|pectinesterase, putative, expressed
									osa-miR3980b-3p	LOC_Os11g06934.2	2	2511	2531	CUGGCCGAGGCCGUCGAUUCU	GGAAUCGAUGGUCUCGGCCAU	Cleavage	cDNA|expressed protein
									osa-miR3980b-3p	LOC_Os11g03160.1	2	131	151	CUGGCCGAGGCCGUCGAUUCU	GCAAUCGGCGGCCACGGCCAG	Cleavage	cDNA|glycosyl transferase, family 8, putative, expressed
									osa-miR3980b-3p	LOC_Os08g34900.1	2	602	622	CUGGCCGAGGCCGUCGAUUCU	CUCACCGACGGCCUCGGCCAG	Cleavage	cDNA|pectinesterase, putative, expressed
									osa-miR3981-3p	LOC_Os01g57100.1	2	2368	2388	AGUAUUAGGAUACGUCUCAUC	GAUGGGACGUAUCCUAAUAAU	Cleavage	cDNA|expressed protein
									osa-miR3981-3p	LOC_Os03g47960.1	2	868	888	AGUAUUAGGAUACGUCUCAUC	GAUGUGAUGUAUCCUAGUACU	Cleavage	cDNA|expressed protein
									osa-miR3981-3p	LOC_Os05g07940.4	2	1009	1029	AGUAUUAGGAUACGUCUCAUC	AAUGGGACGUAUCCUAUUACU	Cleavage	cDNA|glyoxalase family protein, putative, expressed
									osa-miR3981-3p	LOC_Os05g07940.3	2	1046	1066	AGUAUUAGGAUACGUCUCAUC	AAUGGGACGUAUCCUAUUACU	Cleavage	cDNA|glyoxalase family protein, putative, expressed
									osa-miR408-3p	LOC_Os03g49820.1	2	131	151	CUGCACUGCCUCUUCCCUGGC	ACCGGGGCAGAGGCGGUGCAG	Cleavage	cDNA|expressed protein
									osa-miR408-3p	LOC_Os03g50160.1	2	117	137	CUGCACUGCCUCUUCCCUGGC	CUCAGGGAAGGGGCAGUGCUG	Cleavage	cDNA|plastocyanin-like domain containing protein, putative, expressed
									osa-miR408-3p	LOC_Os01g02110.1	2	730	750	CUGCACUGCCUCUUCCCUGGC	AGCGGGGAAGAAGCAGUGCAG	Translation	cDNA|helix-loop-helix DNA-binding domain containing protein, expressed
									osa-miR408-3p	LOC_Os07g43540.1	2	184	204	CUGCACUGCCUCUUCCCUGGC	GACAGGGCAGAGGCGGUGCGG	Cleavage	cDNA|ORC6 - Putative origin recognition complex subunit 6, expressed
									osa-miR414	LOC_Os08g43480.2	2	764	784	UCAUCCUCAUCAUCAUCGUCC	UGAUGAUGAUGAUGAUGAUGA	Cleavage	cDNA|zinc finger, C3HC4 type family protein, expressed
									osa-miR414	LOC_Os08g43480.1	2	654	674	UCAUCCUCAUCAUCAUCGUCC	UGAUGAUGAUGAUGAUGAUGA	Cleavage	cDNA|zinc finger, C3HC4 type family protein, expressed
									osa-miR414	LOC_Os03g04920.1	2	1070	1090	UCAUCCUCAUCAUCAUCGUCC	GGGCGAUGAUGAUGAUGAUGA	Cleavage	cDNA|multidrug resistance-associated protein, putative, expressed
									osa-miR414	LOC_Os08g19890.1	2	1746	1766	UCAUCCUCAUCAUCAUCGUCC	GGAUGAUGAUGAUGAUGAUGA	Cleavage	cDNA|ZOS8-03 - C2H2 zinc finger protein, expressed
									osa-miR414	LOC_Os01g28000.1	2	2118	2138	UCAUCCUCAUCAUCAUCGUCC	GGAUGAUGAUGAUGAUGAUGA	Cleavage	cDNA|retrotransposon protein, putative, Ty3-gypsy subclass, expressed
									osa-miR414	LOC_Os09g06560.1	2	1986	2006	UCAUCCUCAUCAUCAUCGUCC	GGAUGAUGAUGAUGAUGAUGA	Cleavage	cDNA|WD domain, G-beta repeat domain containing protein, expressed
									osa-miR414	LOC_Os08g12130.1	2	936	956	UCAUCCUCAUCAUCAUCGUCC	GGAUGAUGAUGAUGAUGAUGA	Cleavage	cDNA|retrotransposon protein, putative, Ty3-gypsy subclass, expressed
									osa-miR414	LOC_Os11g27799.1	2	484	504	UCAUCCUCAUCAUCAUCGUCC	GGAUGAUGAUGAUGAUGAUGA	Cleavage	cDNA|expressed protein
									osa-miR414	LOC_Os08g32180.1	2	1503	1523	UCAUCCUCAUCAUCAUCGUCC	AGAUGAUGAUGAUGAUGAUGA	Cleavage	cDNA|retrotransposon protein, putative, unclassified, expressed
									osa-miR414	LOC_Os06g41750.1	2	2148	2168	UCAUCCUCAUCAUCAUCGUCC	GGAUGAUGAUGAUGAUGAUGA	Cleavage	cDNA|tetratricopeptide repeat domain containing protein, expressed
									osa-miR414	LOC_Os02g48370.2	2	584	604	UCAUCCUCAUCAUCAUCGUCC	GGAUGAUGAUGAGGAGGAUGA	Cleavage	cDNA|ARID/BRIGHT DNA-binding domain-containing protein, putative, expressed
									osa-miR414	LOC_Os02g48370.1	2	584	604	UCAUCCUCAUCAUCAUCGUCC	GGAUGAUGAUGAGGAGGAUGA	Cleavage	cDNA|ARID/BRIGHT DNA-binding domain-containing protein, putative, expressed
									osa-miR414	LOC_Os07g37900.1	2	5985	6005	UCAUCCUCAUCAUCAUCGUCC	UGAUGAUGAUGAUGAUGAUGA	Cleavage	cDNA|retrotransposon protein, putative, unclassified, expressed
									osa-miR414	LOC_Os03g19870.3	2	1283	1303	UCAUCCUCAUCAUCAUCGUCC	GGAUGAUGAGGAUGAGGAUGA	Cleavage	cDNA|ATP binding protein, putative, expressed
									osa-miR414	LOC_Os03g19870.1	2	1283	1303	UCAUCCUCAUCAUCAUCGUCC	GGAUGAUGAGGAUGAGGAUGA	Cleavage	cDNA|ATP binding protein, putative, expressed
									osa-miR414	LOC_Os03g19870.2	2	1283	1303	UCAUCCUCAUCAUCAUCGUCC	GGAUGAUGAGGAUGAGGAUGA	Cleavage	cDNA|ATP binding protein, putative, expressed
									osa-miR414	LOC_Os03g33260.1	2	1521	1541	UCAUCCUCAUCAUCAUCGUCC	GGAUGAUGAGGAUGAGGAUGA	Cleavage	cDNA|retrotransposon protein, putative, unclassified, expressed
									osa-miR414	LOC_Os09g18110.1	2	1197	1217	UCAUCCUCAUCAUCAUCGUCC	GGAUGAUGAUGAUGAUGAUGA	Cleavage	cDNA|retrotransposon protein, putative, unclassified, expressed
									osa-miR414	LOC_Os07g40450.1	2	803	823	UCAUCCUCAUCAUCAUCGUCC	GGAUGAUGAUGAUGAUGAUGA	Cleavage	cDNA|expressed protein
									osa-miR414	LOC_Os12g22510.1	2	726	746	UCAUCCUCAUCAUCAUCGUCC	GGAUGAUGAUGAUGAUGAUGA	Cleavage	cDNA|retrotransposon protein, putative, Ty3-gypsy subclass
									osa-miR414	LOC_Os09g13920.1	2	1125	1145	UCAUCCUCAUCAUCAUCGUCC	GGAUGAUGAUGAUGAUGAUGA	Cleavage	cDNA|expressed protein
									osa-miR414	LOC_Os08g10550.1	2	978	998	UCAUCCUCAUCAUCAUCGUCC	GGUCGAUGAUGAUGAGGAUGU	Cleavage	cDNA|potassium transporter, putative, expressed
									osa-miR414	LOC_Os07g40450.2	2	803	823	UCAUCCUCAUCAUCAUCGUCC	GGAUGAUGAUGAUGAUGAUGA	Cleavage	cDNA|expressed protein
									osa-miR414	LOC_Os01g48180.1	2	4713	4733	UCAUCCUCAUCAUCAUCGUCC	AGGUGAUGAUGGUGAGGAUGG	Cleavage	cDNA|DDT domain containing protein, putative, expressed
									osa-miR414	LOC_Os07g30190.1	2	2205	2225	UCAUCCUCAUCAUCAUCGUCC	UGAUGGUGAUGAUGAGGAUGC	Cleavage	cDNA|retrotransposon protein, putative, unclassified, expressed
									osa-miR414	LOC_Os08g31150.1	2	5799	5819	UCAUCCUCAUCAUCAUCGUCC	UGAUGAUGAUGAUGAUGAUGA	Cleavage	cDNA|retrotransposon protein, putative, unclassified, expressed
									osa-miR414	LOC_Os08g31150.1	2	5820	5840	UCAUCCUCAUCAUCAUCGUCC	UGAUGAUGAUGAUGAUGAUGA	Cleavage	cDNA|retrotransposon protein, putative, unclassified, expressed
									osa-miR414	LOC_Os11g39510.1	2	5505	5525	UCAUCCUCAUCAUCAUCGUCC	AGAUGAUGAUGAUGAUGAUGA	Cleavage	cDNA|retrotransposon protein, putative, unclassified, expressed
									osa-miR414	LOC_Os11g37050.1	2	1586	1606	UCAUCCUCAUCAUCAUCGUCC	UGAUGAUGAUGAUGAGGAGGA	Cleavage	cDNA|expressed protein
									osa-miR414	LOC_Os12g27410.1	2	315	335	UCAUCCUCAUCAUCAUCGUCC	UGAUGGUGAUGAUGAGGAUGC	Cleavage	cDNA|retrotransposon protein, putative, unclassified, expressed
									osa-miR414	LOC_Os11g38520.1	2	1646	1666	UCAUCCUCAUCAUCAUCGUCC	UGAUGAUGAUGAUGAGGAGGA	Cleavage	cDNA|expressed protein
									osa-miR414	LOC_Os05g49550.1	2	4164	4184	UCAUCCUCAUCAUCAUCGUCC	UGAUGAUGAUGAUGAAGAUGA	Cleavage	cDNA|retrotransposon protein, putative, Ty1-copia subclass, expressed
									osa-miR414	LOC_Os08g13740.1	2	549	569	UCAUCCUCAUCAUCAUCGUCC	AGAUGAUGAUGAUGAUGAUGA	Cleavage	cDNA|expressed protein
									osa-miR414	LOC_Os07g42180.1	2	1159	1179	UCAUCCUCAUCAUCAUCGUCC	CGGCGAUGAUGAUGAGGUUGA	Cleavage	cDNA|exportin 1, putative, expressed
									osa-miR414	LOC_Os08g22180.1	2	636	656	UCAUCCUCAUCAUCAUCGUCC	UGAUGAUGAUGAUGAUGAUGA	Cleavage	cDNA|retrotransposon protein, putative, Ty3-gypsy subclass, expressed
									osa-miR414	LOC_Os08g24946.1	2	696	716	UCAUCCUCAUCAUCAUCGUCC	UGAUGAUGAUGAAGAGGAUGA	Cleavage	cDNA|EDM2, putative, expressed
									osa-miR414	LOC_Os11g47320.1	2	3034	3054	UCAUCCUCAUCAUCAUCGUCC	UGAUGAUGAUGAUGAUGAUGA	Cleavage	cDNA|protein transporter, putative, expressed
									osa-miR414	LOC_Os03g54150.1	2	728	748	UCAUCCUCAUCAUCAUCGUCC	AGAUGAUGAUGAUGAGGAGGA	Cleavage	cDNA|expressed protein
									osa-miR414	LOC_Os11g47320.2	2	3034	3054	UCAUCCUCAUCAUCAUCGUCC	UGAUGAUGAUGAUGAUGAUGA	Cleavage	cDNA|protein transporter, putative, expressed
									osa-miR414	LOC_Os11g20510.1	2	1059	1079	UCAUCCUCAUCAUCAUCGUCC	UGAUGAUGAUGAUGAUGAUGA	Cleavage	cDNA|retrotransposon protein, putative, Ty3-gypsy subclass, expressed
									osa-miR414	LOC_Os09g18560.1	2	60	80	UCAUCCUCAUCAUCAUCGUCC	GGAUGAUGAUGAUGAGGAGGA	Cleavage	cDNA|expressed protein
									osa-miR414	LOC_Os03g54150.2	2	495	515	UCAUCCUCAUCAUCAUCGUCC	AGAUGAUGAUGAUGAGGAGGA	Cleavage	cDNA|expressed protein
									osa-miR414	LOC_Os04g16400.1	2	12	32	UCAUCCUCAUCAUCAUCGUCC	UGAUGAUGAUGAUGACGAUGA	Cleavage	cDNA|retrotransposon protein, putative, Ty3-gypsy subclass, expressed
									osa-miR414	LOC_Os01g22990.2	2	2898	2918	UCAUCCUCAUCAUCAUCGUCC	CGACGAUGAUGAUGACGAUGG	Cleavage	cDNA|acidic leucine-rich nuclear phosphoprotein 32-related protein 1, putative, expressed
									osa-miR414	LOC_Os12g27780.1	2	3192	3212	UCAUCCUCAUCAUCAUCGUCC	AGAUGAUGAUGACGAGGAUGA	Cleavage	cDNA|transposon protein, putative, CACTA, En/Spm sub-class, expressed
									osa-miR414	LOC_Os03g40110.1	2	1230	1250	UCAUCCUCAUCAUCAUCGUCC	UGAUGAUGAUGCUGAGGAUGA	Translation	cDNA|nop14-like family protein, expressed
									osa-miR414	LOC_Os12g37980.1	2	2908	2928	UCAUCCUCAUCAUCAUCGUCC	AGAUGAUGAUGAUGAUGAUGA	Cleavage	cDNA|protein kinase domain containing protein, expressed
									osa-miR414	LOC_Os09g05070.1	2	696	716	UCAUCCUCAUCAUCAUCGUCC	UGAUGAUGAUGAUGAUGAUGA	Cleavage	cDNA|retrotransposon protein, putative, Ty3-gypsy subclass, expressed
									osa-miR414	LOC_Os08g21124.1	2	780	800	UCAUCCUCAUCAUCAUCGUCC	AGAUGAUGAUGAUGAUGAUGA	Cleavage	cDNA|retrotransposon protein, putative, Ty3-gypsy subclass, expressed
									osa-miR414	LOC_Os07g42080.1	2	611	631	UCAUCCUCAUCAUCAUCGUCC	GGAUGGGGAUGAUGAGGAUGA	Cleavage	cDNA|expressed protein
									osa-miR414	LOC_Os03g05950.1	2	675	695	UCAUCCUCAUCAUCAUCGUCC	GGAUAGUGAUGAUGAGGAUGA	Cleavage	cDNA|retrotransposon protein, putative, unclassified, expressed
									osa-miR414	LOC_Os10g16390.1	2	510	530	UCAUCCUCAUCAUCAUCGUCC	UGAUGAUGAUGAUGAUGAUGA	Cleavage	cDNA|retrotransposon protein, putative, Ty3-gypsy subclass, expressed
									osa-miR414	LOC_Os11g23060.1	2	747	767	UCAUCCUCAUCAUCAUCGUCC	UGACGAUGAUGAUGAUGAUGG	Cleavage	cDNA|retrotransposon protein, putative, unclassified, expressed
									osa-miR414	LOC_Os05g46230.1	2	1182	1202	UCAUCCUCAUCAUCAUCGUCC	CGAUGAUGAAGAUGAGGAUGA	Cleavage	cDNA|NAP domain containing protein, putative, expressed
									osa-miR414	LOC_Os03g42690.1	2	2637	2657	UCAUCCUCAUCAUCAUCGUCC	AGAUGAUGAUGACGAGGAUGA	Cleavage	cDNA|transposon protein, putative, CACTA, En/Spm sub-class, expressed
									osa-miR414	LOC_Os04g48040.1	2	1437	1457	UCAUCCUCAUCAUCAUCGUCC	UGAUGAUGAUGAUGAUGAUGA	Cleavage	cDNA|expressed protein
									osa-miR414	LOC_Os03g52980.1	2	541	561	UCAUCCUCAUCAUCAUCGUCC	UGAUGAUGAUGAUGAGGAGGA	Cleavage	cDNA|CWF19-like 2, cell cycle control, putative, expressed
									osa-miR414	LOC_Os08g05280.1	2	1475	1495	UCAUCCUCAUCAUCAUCGUCC	CGACGAUGAUGGUGAUGAUGA	Cleavage	cDNA|oxidoreductase family, NAD-binding Rossmann fold containing protein, expressed
									osa-miR414	LOC_Os12g09300.3	2	690	710	UCAUCCUCAUCAUCAUCGUCC	AGAUGAUGAUGAUGAUGAUGA	Cleavage	cDNA|amino acid transporter, putative, expressed
									osa-miR414	LOC_Os01g13300.1	2	1679	1699	UCAUCCUCAUCAUCAUCGUCC	AGAUGAUGAUGAUGAUGAUGA	Cleavage	cDNA|B3 DNA binding domain containing protein, expressed
									osa-miR414	LOC_Os07g41190.1	2	440	460	UCAUCCUCAUCAUCAUCGUCC	UGGUGGUGAUGGUGAGGAUGA	Cleavage	cDNA|WD domain, G-beta repeat domain containing protein, expressed
									osa-miR414	LOC_Os03g44430.1	2	1294	1314	UCAUCCUCAUCAUCAUCGUCC	CGAUGAUGAUGAUGAUGAUGA	Cleavage	cDNA|ubiquitin carboxyl-terminal hydrolase, family 1, putative, expressed
									osa-miR414	LOC_Os03g44430.1	2	1234	1254	UCAUCCUCAUCAUCAUCGUCC	GUAUGAUGAUGAUGAGGAGGA	Cleavage	cDNA|ubiquitin carboxyl-terminal hydrolase, family 1, putative, expressed
									osa-miR414	LOC_Os04g33360.1	2	957	977	UCAUCCUCAUCAUCAUCGUCC	UGGCGAUGAUGAUGAUGAUGA	Cleavage	cDNA|gibberellin 2-beta-dioxygenase 7, putative, expressed
									osa-miR414	LOC_Os11g35320.1	2	1261	1281	UCAUCCUCAUCAUCAUCGUCC	CGAUGAUGAUGACGAGGAUGA	Cleavage	cDNA|BSD domain-containing protein, putative, expressed
									osa-miR414	LOC_Os03g39520.1	2	939	959	UCAUCCUCAUCAUCAUCGUCC	AGAUGAUGAUGAUGAUGAUGA	Cleavage	cDNA|plant protein of unknown function domain containing protein, expressed
									osa-miR414	LOC_Os03g64350.1	2	975	995	UCAUCCUCAUCAUCAUCGUCC	UGAUGAUGAUGAUGAGGAGGA	Cleavage	cDNA|rhodanese-like domain containing protein, putative, expressed
									osa-miR414	LOC_Os03g64350.2	2	970	990	UCAUCCUCAUCAUCAUCGUCC	UGAUGAUGAUGAUGAGGAGGA	Cleavage	cDNA|rhodanese-like domain containing protein, putative, expressed
									osa-miR414	LOC_Os11g41920.1	2	1530	1550	UCAUCCUCAUCAUCAUCGUCC	CGAUGAUGAUGAUGAUGAUGA	Cleavage	cDNA|expressed protein
									osa-miR414	LOC_Os07g42510.1	2	380	400	UCAUCCUCAUCAUCAUCGUCC	CGAUGAUGAUGAUGAUGAUGA	Cleavage	cDNA|AP2 domain containing protein, expressed
									osa-miR414	LOC_Os01g50360.1	2	918	938	UCAUCCUCAUCAUCAUCGUCC	CGACGAUGACGAUGGGGAUGA	Cleavage	cDNA|NAC domain containing protein, putative, expressed
									osa-miR414	LOC_Os01g72630.1	2	324	344	UCAUCCUCAUCAUCAUCGUCC	UGAUGAUGAUGAUGAUGAUGA	Cleavage	cDNA|expressed protein
									osa-miR414	LOC_Os07g43650.1	2	1344	1364	UCAUCCUCAUCAUCAUCGUCC	UGAUGAUGAUGAUGAUGAUGA	Cleavage	cDNA|retrotransposon protein, putative, Ty3-gypsy subclass, expressed
									osa-miR414	LOC_Os05g08730.1	2	582	602	UCAUCCUCAUCAUCAUCGUCC	UGAUGAUGAUGCUGAGGAUGA	Translation	cDNA|early fruit mRNA, putative, expressed
									osa-miR414	LOC_Os08g09410.1	2	726	746	UCAUCCUCAUCAUCAUCGUCC	UGAUGAUGAUGAUGAGGAGGA	Cleavage	cDNA|OsFBX265 - F-box domain containing protein, expressed
									osa-miR414	LOC_Os12g04060.1	2	825	845	UCAUCCUCAUCAUCAUCGUCC	UGAUGAUGAUGAUGAUGAUGA	Cleavage	cDNA|transcription initiation factor, putative, expressed
									osa-miR414	LOC_Os11g30430.1	2	228	248	UCAUCCUCAUCAUCAUCGUCC	UGAUGAUGAUGAUGAGGACGA	Cleavage	cDNA|expressed protein
									osa-miR414	LOC_Os01g22990.1	2	688	708	UCAUCCUCAUCAUCAUCGUCC	CGACGAUGAUGAUGACGAUGG	Cleavage	cDNA|acidic leucine-rich nuclear phosphoprotein 32-related protein 1, putative, expressed
									osa-miR414	LOC_Os04g37940.1	2	537	557	UCAUCCUCAUCAUCAUCGUCC	CGAUGAUGAUGAUGAUGAUGA	Cleavage	cDNA|expressed protein
									osa-miR414	LOC_Os08g38580.1	2	929	949	UCAUCCUCAUCAUCAUCGUCC	UGAUGAUGAUGAUGAUGAUGA	Cleavage	cDNA|harpin-induced protein 1 domain containing protein, expressed
									osa-miR414	LOC_Os11g09910.1	2	891	911	UCAUCCUCAUCAUCAUCGUCC	UGAUGGUGGUGAUGAGGGUGA	Cleavage	cDNA|retrotransposon protein, putative, unclassified, expressed
									osa-miR414	LOC_Os05g51860.1	2	696	716	UCAUCCUCAUCAUCAUCGUCC	GGACGCCGAUGAUGAGGAUGA	Cleavage	cDNA|expressed protein
									osa-miR414	LOC_Os01g46470.1	2	1293	1313	UCAUCCUCAUCAUCAUCGUCC	ACAUGAUGAUGAUGAAGAUGA	Cleavage	cDNA|expressed protein
									osa-miR414	LOC_Os08g06344.1	2	1126	1146	UCAUCCUCAUCAUCAUCGUCC	UGACGAGGAUGAUGAGGGUGG	Cleavage	cDNA|transposon protein, putative, CACTA, En/Spm sub-class, expressed
									osa-miR414	LOC_Os04g11240.1	2	1167	1187	UCAUCCUCAUCAUCAUCGUCC	GUCGGAUGAUGAUGAGGAUGA	Cleavage	cDNA|retrotransposon protein, putative, Ty3-gypsy subclass, expressed
									osa-miR414	LOC_Os08g06344.3	2	1082	1102	UCAUCCUCAUCAUCAUCGUCC	UGACGAGGAUGAUGAGGGUGG	Cleavage	cDNA|transposon protein, putative, CACTA, En/Spm sub-class, expressed
									osa-miR414	LOC_Os04g17290.1	2	660	680	UCAUCCUCAUCAUCAUCGUCC	UGAUGAUGAUGAUGAUGAUGA	Cleavage	cDNA|retrotransposon protein, putative, Ty3-gypsy subclass
									osa-miR414	LOC_Os01g01960.1	2	2781	2801	UCAUCCUCAUCAUCAUCGUCC	UGAUGCUGAUGAUGAGGGUGA	Cleavage	cDNA|transcriptional repressor, putative, expressed
									osa-miR414	LOC_Os02g15570.1	2	621	641	UCAUCCUCAUCAUCAUCGUCC	UGAUGAUGAUGAUGAUGAUGA	Cleavage	cDNA|expressed protein
									osa-miR414	LOC_Os05g11330.1	2	493	513	UCAUCCUCAUCAUCAUCGUCC	UGACGAUGAUGAUGAUGGUGA	Cleavage	cDNA|RALFL19 - Rapid ALkalinization Factor RALF family protein precursor, expressed
									osa-miR414	LOC_Os08g06344.2	2	1082	1102	UCAUCCUCAUCAUCAUCGUCC	UGACGAGGAUGAUGAGGGUGG	Cleavage	cDNA|transposon protein, putative, CACTA, En/Spm sub-class, expressed
									osa-miR414	LOC_Os08g36510.1	2	699	719	UCAUCCUCAUCAUCAUCGUCC	UGAUGAUGAUGAUGAUGAUGA	Cleavage	cDNA|retrotransposon protein, putative, unclassified, expressed
									osa-miR415	LOC_Os03g17920.3	2	373	393	AACAGAACAGAAGCAGAGCAG	UUCCUCUGUUUUUGUUCUGUU	Cleavage	cDNA|RNA pseudouridine synthase, putative, expressed
									osa-miR418	LOC_Os10g11580.1	2	1418	1438	UAAUGUGAUGAUGAAAUGACG	GUUCAUUUUAUCAUCAUAUUC	Cleavage	cDNA|histone-like transcription factor and archaeal histone, putative, expressed
									osa-miR437	LOC_Os04g33880.2	2	694	714	AAAGUUAGAGAAGUUUGACUU	AAGUUAAAAUUCUCUAACUUU	Cleavage	cDNA|HVA22, putative, expressed
									osa-miR437	LOC_Os11g42220.1	2	2065	2085	AAAGUUAGAGAAGUUUGACUU	UUGUCAAACUUCUUUAAUUUA	Cleavage	cDNA|laccase precursor protein, putative, expressed
									osa-miR437	LOC_Os02g48900.2	2	270	290	AAAGUUAGAGAAGUUUGACUU	AUGUCAAACUUUUAUAACUUU	Cleavage	cDNA|aspartic proteinase nepenthesin-1 precursor, putative, expressed
									osa-miR444b.1	LOC_Os05g12770.1	2	100	120	UGUUGUCUCAAGCUUGCUGCC	AUCACCAAGCUUGAGACGACG	Cleavage	cDNA|NB-ARC domain containing protein, expressed
									osa-miR444b.2	LOC_Os08g33479.2	2	476	496	UGCAGUUGUUGUCUCAAGCUU	AAGCUAGAGGCAGCAACUGCA	Cleavage	cDNA|expressed protein
									osa-miR444b.2	LOC_Os08g33479.1	2	154	174	UGCAGUUGUUGUCUCAAGCUU	AAGCUAGAGGCAGCAACUGCA	Cleavage	cDNA|expressed protein
									osa-miR444b.2	LOC_Os01g44990.1	2	1182	1202	UGCAGUUGUUGUCUCAAGCUU	GUGCUUGAGGCAACAACUGAA	Cleavage	cDNA|ercc6 protein, putative, expressed
									osa-miR444c.1	LOC_Os05g12770.1	2	100	120	UGUUGUCUCAAGCUUGCUGCC	AUCACCAAGCUUGAGACGACG	Cleavage	cDNA|NB-ARC domain containing protein, expressed
									osa-miR444c.2	LOC_Os08g33479.1	2	154	174	UGCAGUUGUUGUCUCAAGCUU	AAGCUAGAGGCAGCAACUGCA	Cleavage	cDNA|expressed protein
									osa-miR444c.2	LOC_Os08g33479.2	2	476	496	UGCAGUUGUUGUCUCAAGCUU	AAGCUAGAGGCAGCAACUGCA	Cleavage	cDNA|expressed protein
									osa-miR444c.2	LOC_Os01g44990.1	2	1182	1202	UGCAGUUGUUGUCUCAAGCUU	GUGCUUGAGGCAACAACUGAA	Cleavage	cDNA|ercc6 protein, putative, expressed
									osa-miR444f	LOC_Os07g14514.2	2	193	213	UGCAGUUGUUGCCUCAAGCUU	CAGCUUGGGGCGACGGCUGCA	Cleavage	cDNA|retrotransposon protein, putative, unclassified, expressed
									osa-miR444f	LOC_Os07g14514.4	2	193	213	UGCAGUUGUUGCCUCAAGCUU	CAGCUUGGGGCGACGGCUGCA	Cleavage	cDNA|retrotransposon protein, putative, unclassified, expressed
									osa-miR444f	LOC_Os07g14514.6	2	193	213	UGCAGUUGUUGCCUCAAGCUU	CAGCUUGGGGCGACGGCUGCA	Cleavage	cDNA|retrotransposon protein, putative, unclassified, expressed
									osa-miR5075	LOC_Os08g11960.1	2	294	314	UUCUCCGUCGCCGCCGUCCGC	GUCGACGGCGGCGACGGAGAC	Cleavage	cDNA|retrotransposon protein, putative, Ty3-gypsy subclass, expressed
									osa-miR5075	LOC_Os11g10500.1	2	13	33	UUCUCCGUCGCCGCCGUCCGC	GCGAAUGGCGGCGGCGGAGAA	Cleavage	cDNA|retrotransposon protein, putative, Ty1-copia subclass, expressed
									osa-miR5075	LOC_Os06g23870.1	2	157	177	UUCUCCGUCGCCGCCGUCCGC	GCGGGCGGUGGCGGCGGAGGA	Cleavage	cDNA|acyl-CoA dehydrogenase domain protein, putative, expressed
									osa-miR5075	LOC_Os06g44450.1	2	1033	1053	UUCUCCGUCGCCGCCGUCCGC	GCGGGCGGCGGCGAUGGGGGA	Cleavage	cDNA|CCT/B-box zinc finger protein, putative, expressed
									osa-miR5075	LOC_Os06g44740.1	2	1536	1556	UUCUCCGUCGCCGCCGUCCGC	GCUGGCGGCGGCGACGGAGGA	Cleavage	cDNA|retrotransposon protein, putative, unclassified, expressed
									osa-miR5075	LOC_Os08g04390.2	2	105	125	UUCUCCGUCGCCGCCGUCCGC	GCGGACGGCGGCGGCGGAGGC	Cleavage	cDNA|basic helix-loop-helix DND-binding domain containing protein, expressed
									osa-miR5075	LOC_Os06g07770.1	2	52	72	UUCUCCGUCGCCGCCGUCCGC	GGGGAUGGCGGCGGUGGAGGA	Cleavage	cDNA|expressed protein
									osa-miR5075	LOC_Os12g05180.1	2	511	531	UUCUCCGUCGCCGCCGUCCGC	GCGAGCGGCGGCGGCGGAGAA	Cleavage	cDNA|avr9/Cf-9 rapidly elicited protein, putative, expressed
									osa-miR5075	LOC_Os10g18370.1	2	640	660	UUCUCCGUCGCCGCCGUCCGC	GCGGGCGGCGGCGGCGGGGGA	Cleavage	cDNA|transcriptional regulator, putative, expressed
									osa-miR5075	LOC_Os06g06550.1	2	9	29	UUCUCCGUCGCCGCCGUCCGC	GUGGACGGCGGCGGCGGGGAU	Cleavage	cDNA|plant protein of unknown function domain containing protein, expressed
									osa-miR5075	LOC_Os11g37630.1	2	2091	2111	UUCUCCGUCGCCGCCGUCCGC	CCGGGCGGCGGCGACGGGGGG	Cleavage	cDNA|expressed protein
									osa-miR5075	LOC_Os07g10530.1	2	325	345	UUCUCCGUCGCCGCCGUCCGC	GUGGGCGGCGGCGGCGGAGGG	Cleavage	cDNA|carboxyl-terminal peptidase, putative, expressed
									osa-miR5075	LOC_Os01g15020.1	2	164	184	UUCUCCGUCGCCGCCGUCCGC	GGCGGCGGCGGCGACGGGGAA	Cleavage	cDNA|lissencephaly type-1-like homology motif, putative, expressed
									osa-miR5075	LOC_Os01g15020.2	2	112	132	UUCUCCGUCGCCGCCGUCCGC	GGCGGCGGCGGCGACGGGGAA	Cleavage	cDNA|lissencephaly type-1-like homology motif, putative, expressed
									osa-miR5075	LOC_Os06g45630.1	2	425	445	UUCUCCGUCGCCGCCGUCCGC	GGCGACGGCGGCGGCGGAGAG	Cleavage	cDNA|expressed protein
									osa-miR5075	LOC_Os09g36180.1	2	31	51	UUCUCCGUCGCCGCCGUCCGC	ACGGCCGGCGGCGGCGGAGGA	Cleavage	cDNA|glycosyl transferase family 8 protein, expressed
									osa-miR5075	LOC_Os10g37500.1	2	1509	1529	UUCUCCGUCGCCGCCGUCCGC	CCGGGCGGCGGCGGCGGGGGA	Cleavage	cDNA|AAA-type ATPase family protein, putative, expressed
									osa-miR5075	LOC_Os12g38460.1	2	39	59	UUCUCCGUCGCCGCCGUCCGC	GGCGGCGGCGGCGACGGGGAA	Cleavage	cDNA|RNA recognition motif family protein, expressed
									osa-miR5075	LOC_Os12g05900.2	2	1402	1422	UUCUCCGUCGCCGCCGUCCGC	GAGGACGGCGGCGGCGGCGAA	Cleavage	cDNA|rhoGAP domain containing protein, expressed
									osa-miR5075	LOC_Os04g54850.1	2	2689	2709	UUCUCCGUCGCCGCCGUCCGC	GAGGACGGUGGUGAUGGAGAG	Cleavage	cDNA|pectinesterase, putative, expressed
									osa-miR5075	LOC_Os10g36229.1	2	165	185	UUCUCCGUCGCCGCCGUCCGC	CGGGACGGCGGCGCCGGAGGA	Cleavage	cDNA|mov34/MPN/PAD-1 family protein, expressed
									osa-miR5075	LOC_Os02g21500.1	2	606	626	UUCUCCGUCGCCGCCGUCCGC	GCGGAAGGCGGCGACGGAGAC	Cleavage	cDNA|PE-PGRS family protein, putative, expressed
									osa-miR5075	LOC_Os07g45310.1	2	421	441	UUCUCCGUCGCCGCCGUCCGC	UCGGACGGCGGCGGCGGCGAA	Cleavage	cDNA|BSD domain-containing protein, putative, expressed
									osa-miR5075	LOC_Os03g49800.1	2	297	317	UUCUCCGUCGCCGCCGUCCGC	GGGGGCGGCGGUGGUGGAGAA	Cleavage	cDNA|phosphatidylinositol-4-phosphate 5-kinase, putative, expressed
									osa-miR5075	LOC_Os12g05420.1	2	289	309	UUCUCCGUCGCCGCCGUCCGC	GUGGCCGGCGGCGGCGGAGGA	Cleavage	cDNA|calmodulin-binding protein, putative, expressed
									osa-miR5075	LOC_Os12g05900.1	2	1402	1422	UUCUCCGUCGCCGCCGUCCGC	GAGGACGGCGGCGGCGGCGAA	Cleavage	cDNA|rhoGAP domain containing protein, expressed
									osa-miR5075	LOC_Os03g15010.1	2	244	264	UUCUCCGUCGCCGCCGUCCGC	GAGGAGGGCGGCGACGGGGAG	Cleavage	cDNA|transposon protein, putative, unclassified, expressed
									osa-miR5075	LOC_Os05g32710.1	2	175	195	UUCUCCGUCGCCGCCGUCCGC	GGGGACGGCGGCGGCGGGGGG	Cleavage	cDNA|Alpha amylase, catalytic domain containing protein, expressed
									osa-miR5075	LOC_Os01g72220.1	2	144	164	UUCUCCGUCGCCGCCGUCCGC	GGGGGCGGCGGCGGCGGGGAG	Cleavage	cDNA|WD domain, G-beta repeat domain containing protein, expressed
									osa-miR5075	LOC_Os02g40070.1	2	454	474	UUCUCCGUCGCCGCCGUCCGC	GAGGGCGGCGGCGGUGGAGGA	Cleavage	cDNA|AP2-like ethylene-responsive transcription factor PLETHORA 2, putative, expressed
									osa-miR5075	LOC_Os08g34210.2	2	271	291	UUCUCCGUCGCCGCCGUCCGC	AGCGGCGGCGGCGGCGGAGAA	Cleavage	cDNA|aldehyde dehydrogenase, putative, expressed
									osa-miR5079a	LOC_Os02g27130.1	2	3338	3359	UUUGGAUCUGUUAUUUUGGUAU	AUACCAAAACAGCAGAUCCAAA	Cleavage	cDNA|expressed protein
									osa-miR5079b	LOC_Os02g27130.1	2	3338	3359	UUUGGAUCUGUUAUUUUGGUAU	AUACCAAAACAGCAGAUCCAAA	Cleavage	cDNA|expressed protein
									osa-miR5143a	LOC_Os10g25180.1	2	408	431	UGUGGUAUGUUGGCAAUGUAGGAA	UUUCUACAUUGCCAACUUACUACA	Cleavage	cDNA|phosphoinositide phosphatase family protein, putative, expressed
									osa-miR5143b	LOC_Os10g25180.1	2	408	431	UGUGGUAUGUUGGCAAUGUAGGAA	UUUCUACAUUGCCAACUUACUACA	Cleavage	cDNA|phosphoinositide phosphatase family protein, putative, expressed
									osa-miR5145	LOC_Os05g23670.1	2	2171	2194	ACCUGUUUGGAUUCUUGAGGGCUA	CCAUCUUCAAGAAUUCAAACAGGA	Cleavage	cDNA|transcription factor jumonji, putative, expressed
									osa-miR5145	LOC_Os01g02800.1	2	728	751	ACCUGUUUGGAUUCUUGAGGGCUA	AAUGCCUGAAGGAUUCAAACAGGU	Cleavage	cDNA|receptor-like kinase ARK1AS, putative, expressed
									osa-miR5145	LOC_Os01g02830.1	2	830	853	ACCUGUUUGGAUUCUUGAGGGCUA	AAUGCCUGAAGGAUUCAAACAGGU	Cleavage	cDNA|receptor-like kinase ARK1AS, putative, expressed
									osa-miR5148a	LOC_Os12g40279.2	2	1403	1426	UGAGGGGUAGAAAUGUCAUAUCAU	UUUCUGUAACAUUUUUACCCCUCA	Cleavage	cDNA|protein kinase domain containing protein, expressed
									osa-miR5148a	LOC_Os12g40279.1	2	1403	1426	UGAGGGGUAGAAAUGUCAUAUCAU	UUUCUGUAACAUUUUUACCCCUCA	Cleavage	cDNA|protein kinase domain containing protein, expressed
									osa-miR5148b	LOC_Os12g40279.2	2	1403	1426	UGAGGGGUAGAAAUGUCAUAUCAU	UUUCUGUAACAUUUUUACCCCUCA	Cleavage	cDNA|protein kinase domain containing protein, expressed
									osa-miR5148b	LOC_Os12g40279.1	2	1403	1426	UGAGGGGUAGAAAUGUCAUAUCAU	UUUCUGUAACAUUUUUACCCCUCA	Cleavage	cDNA|protein kinase domain containing protein, expressed
									osa-miR5148c	LOC_Os12g40279.2	2	1403	1426	UGAGGGGUAGAAAUGUCAUAUCAU	UUUCUGUAACAUUUUUACCCCUCA	Cleavage	cDNA|protein kinase domain containing protein, expressed
									osa-miR5148c	LOC_Os12g40279.1	2	1403	1426	UGAGGGGUAGAAAUGUCAUAUCAU	UUUCUGUAACAUUUUUACCCCUCA	Cleavage	cDNA|protein kinase domain containing protein, expressed
									osa-miR5150-5p	LOC_Os03g17800.1	2	954	977	AGCUUCUGACAGCUGCAGUUUCUC	AGGAGAUUGUAGCUGUCGGGAGCU	Cleavage	cDNA|phosphatidylinositol transfer protein alpha isoform, putative, expressed
									osa-miR5152-5p	LOC_Os06g29450.1	2	948	968	GUAGGGAUAGGCAUGAUCUCU	CUGGACCAUGCCUAUCCCUGC	Cleavage	cDNA|expressed protein
									osa-miR5157a-5p	LOC_Os10g20930.1	2	1449	1472	AACUUUUUAAUAGCUACAACUUCU	UCUUUUUGUAGCUAUUGACAAGUU	Cleavage	cDNA|retrotransposon protein, putative, Ty3-gypsy subclass, expressed
									osa-miR5157b-5p	LOC_Os10g20930.1	2	1449	1472	AACUUUUUAAUAGCUACAACUUCU	UCUUUUUGUAGCUAUUGACAAGUU	Cleavage	cDNA|retrotransposon protein, putative, Ty3-gypsy subclass, expressed
									osa-miR5162	LOC_Os04g17980.1	2	695	718	AAAUGACCAAAAUACCCCUAGAAC	CGGUUGAGGGUGUUUUGGUCAUUU	Cleavage	cDNA|retrotransposon, putative, centromere-specific, expressed
									osa-miR528-5p	LOC_Os06g06050.1	2	2648	2668	UGGAAGGGGCAUGCAGAGGAG	UUCCUCUGCUUGCCUCUUCCA	Cleavage	cDNA|OsFBL27 - F-box domain and LRR containing protein, expressed
									osa-miR528-5p	LOC_Os08g42640.1	2	630	650	UGGAAGGGGCAUGCAGAGGAG	AUCCUGUGCAUGUCCCUUCUA	Cleavage	cDNA|zinc finger, C3HC4 type domain containing protein, expressed
									osa-miR529b	LOC_Os09g32944.1	2	1029	1049	AGAAGAGAGAGAGUACAGCUU	CGAUUGUGCUCUCUCUCUUCU	Cleavage	cDNA|OsSPL18 - SBP-box gene family member, expressed
									osa-miR529b	LOC_Os08g41940.1	2	1049	1069	AGAAGAGAGAGAGUACAGCUU	CGAUUGUGCUCUCUCUCUUCU	Cleavage	cDNA|OsSPL16 - SBP-box gene family member, expressed
									osa-miR529b	LOC_Os01g65780.3	2	66	86	AGAAGAGAGAGAGUACAGCUU	AUGUUUUACUCUCUCUUUUCU	Cleavage	cDNA|glycosyl transferase, putative, expressed
									osa-miR529b	LOC_Os02g07720.3	2	1135	1155	AGAAGAGAGAGAGUACAGCUU	UUGAUGUACUUUCUCUUUUCU	Cleavage	cDNA|cytidylyltransferase domain containing protein, expressed
									osa-miR529b	LOC_Os05g07090.1	2	1588	1608	AGAAGAGAGAGAGUACAGCUU	CUGUUCUACUCUUUCUCUUCU	Cleavage	cDNA|acyl-coenzyme A dehydrogenase, mitochondrial precursor, putative, expressed
									osa-miR529b	LOC_Os05g07090.3	2	1643	1663	AGAAGAGAGAGAGUACAGCUU	CUGUUCUACUCUUUCUCUUCU	Cleavage	cDNA|acyl-coenzyme A dehydrogenase, mitochondrial precursor, putative, expressed
									osa-miR5340	LOC_Os09g23560.1	2	1402	1424	UGAUGACGUGGAUGAAUUUCAAA	CUUGAGAUUUGUUCACGUCAUCA	Cleavage	cDNA|dehydrogenase, putative, expressed
									osa-miR5340	LOC_Os07g49300.1	2	3581	3603	UGAUGACGUGGAUGAAUUUCAAA	UGAGAGAUUUGUCCAUGUCAUCA	Cleavage	cDNA|expressed protein
									osa-miR5340	LOC_Os04g44500.1	2	714	736	UGAUGACGUGGAUGAAUUUCAAA	GGAGAAGUACAUCCACGUCGUCA	Cleavage	cDNA|GEM, putative, expressed
									osa-miR5340	LOC_Os11g04030.4	2	1296	1318	UGAUGACGUGGAUGAAUUUCAAA	ACUAAGUUUCAUCCAUGUCAUCA	Cleavage	cDNA|major facilitator superfamily antiporter, putative, expressed
									osa-miR535-3p	LOC_Os06g02720.1	2	414	434	GUGCUUUCUCCCGUUGUCACU	UUUGAAAAUGGGAGAAAGUAC	Cleavage	cDNA|transposon protein, putative, Pong sub-class, expressed
									osa-miR535-3p	LOC_Os06g44990.1	2	414	434	GUGCUUUCUCCCGUUGUCACU	UUUGAAAAUGGGAGAAAGUAC	Cleavage	cDNA|transposon protein, putative, Pong sub-class
									osa-miR5490	LOC_Os01g28760.1	2	1130	1150	UUGGAUUUUUAUUUAGGACGG	AUGUCCUGAAUAAAAUUCCAA	Cleavage	cDNA|retrotransposon protein, putative, Ty1-copia subclass, expressed
									osa-miR5490	LOC_Os12g16740.1	2	74	94	UUGGAUUUUUAUUUAGGACGG	AUGUCCUGAAUAAAAUUCCAA	Cleavage	cDNA|retrotransposon protein, putative, Ty1-copia subclass, expressed
									osa-miR5490	LOC_Os12g12040.1	2	1253	1273	UUGGAUUUUUAUUUAGGACGG	AUGUCCUGAAUAAAAUUCCAA	Cleavage	cDNA|retrotransposon protein, putative, Ty1-copia subclass, expressed
									osa-miR5490	LOC_Os07g12350.1	2	794	814	UUGGAUUUUUAUUUAGGACGG	AUGUCCUGAAUAAAAUUCCAA	Cleavage	cDNA|retrotransposon protein, putative, Ty1-copia subclass, expressed
									osa-miR5490	LOC_Os12g09400.1	2	881	901	UUGGAUUUUUAUUUAGGACGG	AUGUCCUGAAUAAAAUUCCAA	Cleavage	cDNA|retrotransposon protein, putative, Ty1-copia subclass
									osa-miR5490	LOC_Os04g03640.1	2	1466	1486	UUGGAUUUUUAUUUAGGACGG	AUGUCCUGAAUAAAAUUCCAA	Cleavage	cDNA|retrotransposon protein, putative, Ty1-copia subclass
									osa-miR5490	LOC_Os12g15290.1	2	668	688	UUGGAUUUUUAUUUAGGACGG	AUGUCCUGAAUAAAAUUCCAA	Cleavage	cDNA|retrotransposon protein, putative, Ty1-copia subclass
									osa-miR5490	LOC_Os12g11730.1	2	1379	1399	UUGGAUUUUUAUUUAGGACGG	AUGUCCUGAAUAAAAUUCCAA	Cleavage	cDNA|retrotransposon protein, putative, Ty1-copia subclass, expressed
									osa-miR5490	LOC_Os08g10120.1	2	1280	1300	UUGGAUUUUUAUUUAGGACGG	AUGUCCUGAAUAAAAUUCCAA	Cleavage	cDNA|retrotransposon protein, putative, Ty1-copia subclass, expressed
									osa-miR5490	LOC_Os01g43210.1	2	1160	1180	UUGGAUUUUUAUUUAGGACGG	AUGUCCUGAAUAAAAUUCCAA	Cleavage	cDNA|retrotransposon protein, putative, Ty1-copia subclass, expressed
									osa-miR5490	LOC_Os06g03340.1	2	1913	1933	UUGGAUUUUUAUUUAGGACGG	AUGUCCUGAAUAAAAUUCCAA	Cleavage	cDNA|retrotransposon protein, putative, Ty1-copia subclass, expressed
									osa-miR5490	LOC_Os07g20620.1	2	1538	1558	UUGGAUUUUUAUUUAGGACGG	AUGUCCUGAAUAAAAUUCCAA	Cleavage	cDNA|retrotransposon protein, putative, Ty1-copia subclass, expressed
									osa-miR5490	LOC_Os04g13240.1	2	1649	1669	UUGGAUUUUUAUUUAGGACGG	AUGUCCUGAAUAAAAUUCCAA	Cleavage	cDNA|retrotransposon protein, putative, Ty1-copia subclass, expressed
									osa-miR5490	LOC_Os11g16610.1	2	1628	1648	UUGGAUUUUUAUUUAGGACGG	AUGUCCUGAAUAAAAUUCCAA	Cleavage	cDNA|retrotransposon protein, putative, Ty1-copia subclass, expressed
									osa-miR5490	LOC_Os01g09050.1	2	1292	1312	UUGGAUUUUUAUUUAGGACGG	AUGUCCUGAAUAAAAUUCCAA	Cleavage	cDNA|retrotransposon protein, putative, Ty1-copia subclass, expressed
									osa-miR5490	LOC_Os04g24100.1	2	2015	2035	UUGGAUUUUUAUUUAGGACGG	AUGUCCUGAAUAAAAUUCCAA	Cleavage	cDNA|retrotransposon protein, putative, Ty1-copia subclass, expressed
									osa-miR5490	LOC_Os10g36460.1	2	1445	1465	UUGGAUUUUUAUUUAGGACGG	AUGUCCUGAAUAAAAUUCCAA	Cleavage	cDNA|retrotransposon protein, putative, Ty1-copia subclass, expressed
									osa-miR5490	LOC_Os01g37410.1	2	2123	2143	UUGGAUUUUUAUUUAGGACGG	AUGUCCUGAAUAAAAUUCCAA	Cleavage	cDNA|retrotransposon protein, putative, Ty1-copia subclass, expressed
									osa-miR5490	LOC_Os08g38660.1	2	1730	1750	UUGGAUUUUUAUUUAGGACGG	AUGUCCUGAAUAAAAUUCCAA	Cleavage	cDNA|retrotransposon protein, putative, Ty1-copia subclass, expressed
									osa-miR5490	LOC_Os06g35840.1	2	1979	1999	UUGGAUUUUUAUUUAGGACGG	AUGUCCUGAAUAAAAUUCCAA	Cleavage	cDNA|retrotransposon protein, putative, Ty1-copia subclass, expressed
									osa-miR5490	LOC_Os06g05460.1	2	1841	1861	UUGGAUUUUUAUUUAGGACGG	AUGUCCUGAAUAAAAUUCCAA	Cleavage	cDNA|retrotransposon protein, putative, Ty1-copia subclass, expressed
									osa-miR5490	LOC_Os12g29310.1	2	1571	1591	UUGGAUUUUUAUUUAGGACGG	AUGUCCUGAAUAAAAUUCCAA	Cleavage	cDNA|retrotransposon protein, putative, Ty1-copia subclass, expressed
									osa-miR5490	LOC_Os04g24350.1	2	1808	1828	UUGGAUUUUUAUUUAGGACGG	AUGUCCUGAAUAAAAUUCCAA	Cleavage	cDNA|retrotransposon protein, putative, Ty1-copia subclass, expressed
									osa-miR5490	LOC_Os09g27180.1	2	1997	2017	UUGGAUUUUUAUUUAGGACGG	AUGUCCUGAAUAAAAUUCCAA	Cleavage	cDNA|retrotransposon protein, putative, Ty1-copia subclass, expressed
									osa-miR5490	LOC_Os06g49270.1	2	2096	2116	UUGGAUUUUUAUUUAGGACGG	AUGUCCUGAAUAAAAUUCCAA	Cleavage	cDNA|retrotransposon protein, putative, Ty1-copia subclass, expressed
									osa-miR5490	LOC_Os02g27320.1	2	1820	1840	UUGGAUUUUUAUUUAGGACGG	AUGUCCUGAAUAAAAUUCCAA	Cleavage	cDNA|retrotransposon protein, putative, Ty1-copia subclass, expressed
									osa-miR5490	LOC_Os11g35800.1	2	1793	1813	UUGGAUUUUUAUUUAGGACGG	AUGUCCUGAAUAAAAUUCCAA	Cleavage	cDNA|retrotransposon protein, putative, Ty1-copia subclass, expressed
									osa-miR5490	LOC_Os09g33750.1	2	1658	1678	UUGGAUUUUUAUUUAGGACGG	AUGUCCUGAAUAAAAUUCCAA	Cleavage	cDNA|retrotransposon protein, putative, Ty1-copia subclass, expressed
									osa-miR5490	LOC_Os03g29130.1	2	1778	1798	UUGGAUUUUUAUUUAGGACGG	AUGUCCUGAAUAAAAUUCCAA	Cleavage	cDNA|retrotransposon protein, putative, Ty1-copia subclass, expressed
									osa-miR5490	LOC_Os06g19040.1	2	1727	1747	UUGGAUUUUUAUUUAGGACGG	AUGUCCUGAAUAAAAUUCCAA	Cleavage	cDNA|retrotransposon protein, putative, Ty1-copia subclass, expressed
									osa-miR5490	LOC_Os01g16270.1	2	1778	1798	UUGGAUUUUUAUUUAGGACGG	AUGUCCUGAAUAAAAUUCCAA	Cleavage	cDNA|retrotransposon protein, putative, Ty1-copia subclass, expressed
									osa-miR5490	LOC_Os06g13500.1	2	1778	1798	UUGGAUUUUUAUUUAGGACGG	AUGUCCUGAAUAAAAUUCCAA	Cleavage	cDNA|retrotransposon protein, putative, Ty1-copia subclass, expressed
									osa-miR5490	LOC_Os08g14170.1	2	1778	1798	UUGGAUUUUUAUUUAGGACGG	AUGUCCUGAAUAAAAUUCCAA	Cleavage	cDNA|retrotransposon protein, putative, Ty1-copia subclass, expressed
									osa-miR5490	LOC_Os03g11850.1	2	1832	1852	UUGGAUUUUUAUUUAGGACGG	AUGUCCUGAAUAAAAUUCCAA	Cleavage	cDNA|retrotransposon protein, putative, Ty1-copia subclass, expressed
									osa-miR5490	LOC_Os12g11970.1	2	2213	2233	UUGGAUUUUUAUUUAGGACGG	AUGUCCUGAAUAAAAUUCCAA	Cleavage	cDNA|retrotransposon protein, putative, Ty1-copia subclass, expressed
									osa-miR5490	LOC_Os12g26520.1	2	2213	2233	UUGGAUUUUUAUUUAGGACGG	AUGUCCUGAAUAAAAUUCCAA	Cleavage	cDNA|retrotransposon protein, putative, Ty1-copia subclass, expressed
									osa-miR5490	LOC_Os12g34580.1	2	2213	2233	UUGGAUUUUUAUUUAGGACGG	AUGUCCUGAAUAAAAUUCCAA	Cleavage	cDNA|retrotransposon protein, putative, Ty1-copia subclass, expressed
									osa-miR5490	LOC_Os11g46090.1	2	2294	2314	UUGGAUUUUUAUUUAGGACGG	AUGUCCUGAAUAAAAUUCCAA	Cleavage	cDNA|retrotransposon protein, putative, Ty1-copia subclass, expressed
									osa-miR5490	LOC_Os03g49660.1	2	2231	2251	UUGGAUUUUUAUUUAGGACGG	AUGUCCUGAAUAAAAUUCCAA	Cleavage	cDNA|retrotransposon protein, putative, Ty1-copia subclass, expressed
									osa-miR5490	LOC_Os04g19950.1	2	1937	1957	UUGGAUUUUUAUUUAGGACGG	AUGUCCUGAAUAAAAUUCCAA	Cleavage	cDNA|retrotransposon protein, putative, Ty1-copia subclass, expressed
									osa-miR5490	LOC_Os01g06810.1	2	1958	1978	UUGGAUUUUUAUUUAGGACGG	AUGUCCUGAAUAAAAUUCCAA	Cleavage	cDNA|retrotransposon protein, putative, Ty1-copia subclass, expressed
									osa-miR5490	LOC_Os05g27770.1	2	2129	2149	UUGGAUUUUUAUUUAGGACGG	AUGUCCUGAAUAAAAUUCCAA	Cleavage	cDNA|retrotransposon protein, putative, Ty1-copia subclass, expressed
									osa-miR5490	LOC_Os06g47810.1	2	2177	2197	UUGGAUUUUUAUUUAGGACGG	AUGUCCUGAAUAAAAUUCCAA	Cleavage	cDNA|retrotransposon protein, putative, Ty1-copia subclass, expressed
									osa-miR5490	LOC_Os07g36270.1	2	2177	2197	UUGGAUUUUUAUUUAGGACGG	AUGUCCUGAAUAAAAUUCCAA	Cleavage	cDNA|retrotransposon protein, putative, Ty1-copia subclass, expressed
									osa-miR5490	LOC_Os12g10500.1	2	2045	2065	UUGGAUUUUUAUUUAGGACGG	AUGUCCUGAAUAAAAUUCCAA	Cleavage	cDNA|retrotransposon protein, putative, Ty1-copia subclass, expressed
									osa-miR5490	LOC_Os10g31220.1	2	2279	2299	UUGGAUUUUUAUUUAGGACGG	AUGUCCUGAAUAAAAUUCCAA	Cleavage	cDNA|retrotransposon protein, putative, Ty1-copia subclass, expressed
									osa-miR5490	LOC_Os01g32990.1	2	2087	2107	UUGGAUUUUUAUUUAGGACGG	AUGUCCUGAAUAAAAUUCCAA	Cleavage	cDNA|retrotransposon protein, putative, Ty1-copia subclass, expressed
									osa-miR5490	LOC_Os01g55660.1	2	2186	2206	UUGGAUUUUUAUUUAGGACGG	AUGUCCUGAAUAAAAUUCCAA	Cleavage	cDNA|retrotransposon protein, putative, Ty1-copia subclass, expressed
									osa-miR5490	LOC_Os06g25910.1	2	2213	2233	UUGGAUUUUUAUUUAGGACGG	AUGUCCUGAAUAAAAUUCCAA	Cleavage	cDNA|retrotransposon protein, putative, Ty1-copia subclass, expressed
									osa-miR5490	LOC_Os07g39380.1	2	2129	2149	UUGGAUUUUUAUUUAGGACGG	AUGUCCUGAAUAAAAUUCCAA	Cleavage	cDNA|retrotransposon protein, putative, Ty1-copia subclass, expressed
									osa-miR5490	LOC_Os05g15810.1	2	2267	2287	UUGGAUUUUUAUUUAGGACGG	AUGUCCUGAAUAAAAUUCCAA	Cleavage	cDNA|retrotransposon protein, putative, Ty1-copia subclass, expressed
									osa-miR5490	LOC_Os05g07190.1	2	2288	2308	UUGGAUUUUUAUUUAGGACGG	AUGUCCUGAAUAAAAUUCCAA	Cleavage	cDNA|retrotransposon protein, putative, Ty1-copia subclass, expressed
									osa-miR5490	LOC_Os02g15990.1	2	2213	2233	UUGGAUUUUUAUUUAGGACGG	AUGUCCUGAAUAAAAUUCCAA	Cleavage	cDNA|retrotransposon protein, putative, Ty1-copia subclass, expressed
									osa-miR5490	LOC_Os03g56676.1	2	2213	2233	UUGGAUUUUUAUUUAGGACGG	AUGUCCUGAAUAAAAUUCCAA	Cleavage	cDNA|retrotransposon protein, putative, Ty1-copia subclass, expressed
									osa-miR5490	LOC_Os07g39670.1	2	2213	2233	UUGGAUUUUUAUUUAGGACGG	AUGUCCUGAAUAAAAUUCCAA	Cleavage	cDNA|retrotransposon protein, putative, Ty1-copia subclass, expressed
									osa-miR5490	LOC_Os08g13340.1	2	2213	2233	UUGGAUUUUUAUUUAGGACGG	AUGUCCUGAAUAAAAUUCCAA	Cleavage	cDNA|retrotransposon protein, putative, Ty1-copia subclass, expressed
									osa-miR5490	LOC_Os08g14340.1	2	2213	2233	UUGGAUUUUUAUUUAGGACGG	AUGUCCUGAAUAAAAUUCCAA	Cleavage	cDNA|retrotransposon protein, putative, Ty1-copia subclass, expressed
									osa-miR5490	LOC_Os06g23860.1	2	2225	2245	UUGGAUUUUUAUUUAGGACGG	AUGUCCUGAAUAAAAUUCCAA	Cleavage	cDNA|retrotransposon protein, putative, Ty1-copia subclass, expressed
									osa-miR5490	LOC_Os02g18310.1	2	2306	2326	UUGGAUUUUUAUUUAGGACGG	AUGUCCUGAAUAAAAUUCCAA	Cleavage	cDNA|retrotransposon protein, putative, Ty1-copia subclass, expressed
									osa-miR5490	LOC_Os06g34090.1	2	2288	2308	UUGGAUUUUUAUUUAGGACGG	AUGUCCUGAAUAAAAUUCCAA	Cleavage	cDNA|retrotransposon protein, putative, Ty1-copia subclass, expressed
									osa-miR5490	LOC_Os12g41080.1	2	2318	2338	UUGGAUUUUUAUUUAGGACGG	AUGUCCUGAAUAAAAUUCCAA	Cleavage	cDNA|retrotransposon protein, putative, Ty1-copia subclass, expressed
									osa-miR5490	LOC_Os10g02960.1	2	2324	2344	UUGGAUUUUUAUUUAGGACGG	AUGUCCUGAAUAAAAUUCCAA	Cleavage	cDNA|retrotransposon protein, putative, Ty1-copia subclass, expressed
									osa-miR5490	LOC_Os12g36260.1	2	2342	2362	UUGGAUUUUUAUUUAGGACGG	AUGUCCUGAAUAAAAUUCCAA	Cleavage	cDNA|retrotransposon protein, putative, Ty1-copia subclass, expressed
									osa-miR5490	LOC_Os12g18250.1	2	2333	2353	UUGGAUUUUUAUUUAGGACGG	AUGUCCUGAAUAAAAUUCCAA	Cleavage	cDNA|retrotransposon protein, putative, Ty1-copia subclass, expressed
									osa-miR5490	LOC_Os03g31200.1	2	2342	2362	UUGGAUUUUUAUUUAGGACGG	AUGUCCUGAAUAAAAUUCCAA	Cleavage	cDNA|retrotransposon protein, putative, Ty1-copia subclass, expressed
									osa-miR5490	LOC_Os10g37468.1	2	2345	2365	UUGGAUUUUUAUUUAGGACGG	AUGUCCUGAAUAAAAUUCCAA	Cleavage	cDNA|retrotransposon protein, putative, Ty1-copia subclass, expressed
									osa-miR5490	LOC_Os10g34890.1	2	2411	2431	UUGGAUUUUUAUUUAGGACGG	AUGUCCUGAAUAAAAUUCCAA	Cleavage	cDNA|retrotransposon protein, putative, Ty1-copia subclass, expressed
									osa-miR5490	LOC_Os02g14370.1	2	1799	1819	UUGGAUUUUUAUUUAGGACGG	AUGUCCUGAAUAAAAUUCCAA	Cleavage	cDNA|retrotransposon protein, putative, Ty1-copia subclass, expressed
									osa-miR5490	LOC_Os03g30450.1	2	2981	3001	UUGGAUUUUUAUUUAGGACGG	AUGUCCUGAAUAAAAUUCCAA	Cleavage	cDNA|retrotransposon protein, putative, Ty1-copia subclass, expressed
									osa-miR5490	LOC_Os07g41110.1	2	3899	3919	UUGGAUUUUUAUUUAGGACGG	AUGUCCUGAAUAAAAUUCCAA	Cleavage	cDNA|retrotransposon protein, putative, unclassified, expressed
									osa-miR5490	LOC_Os08g39174.1	2	4396	4416	UUGGAUUUUUAUUUAGGACGG	AUGUCCUAAAUAAAAUUCCAG	Cleavage	cDNA|retrotransposon protein, putative, Ty1-copia subclass, expressed
									osa-miR5490	LOC_Os11g08590.1	2	1423	1443	UUGGAUUUUUAUUUAGGACGG	CAGUCAUAAAUAAAAAUUUAA	Cleavage	cDNA|expressed protein
									osa-miR5508	LOC_Os03g37070.1	2	137	157	UAGAUGGCUGAUCUGGUGUGG	CUGCACCAGAUCGGCCGUCUG	Cleavage	cDNA|cytochrome P450 71E1, putative, expressed
									osa-miR5508	LOC_Os05g20270.1	2	2288	2308	UAGAUGGCUGAUCUGGUGUGG	CCACACUUGAUCAGCCAUCUG	Cleavage	cDNA|retrotransposon protein, putative, Ty3-gypsy subclass, expressed
									osa-miR5512a	LOC_Os08g10430.1	2	3111	3131	UAGGAUAUGGUAAUGCUAAAA	UUUCAGCAUUAUCAUAUCCUG	Cleavage	cDNA|NBS-LRR disease resistance protein, putative, expressed
									osa-miR5512a	LOC_Os04g39280.2	2	2472	2492	UAGGAUAUGGUAAUGCUAAAA	CUUUAGCAUUAUCAUGUUUUA	Cleavage	cDNA|ATPOT1, putative, expressed
									osa-miR5512b	LOC_Os08g10430.1	2	3111	3131	UAGGAUAUGGUAAUGCUAAAA	UUUCAGCAUUAUCAUAUCCUG	Cleavage	cDNA|NBS-LRR disease resistance protein, putative, expressed
									osa-miR5512b	LOC_Os04g39280.2	2	2472	2492	UAGGAUAUGGUAAUGCUAAAA	CUUUAGCAUUAUCAUGUUUUA	Cleavage	cDNA|ATPOT1, putative, expressed
									osa-miR5524	LOC_Os01g09760.1	2	3237	3257	UGGAAAAUGUGUUCAUGACGG	CAGUCAUGAAUACAUUGUCCA	Cleavage	cDNA|DIRP family protein, putative, expressed
									osa-miR5529	LOC_Os05g20020.1	2	79	99	GUUUCAUCCAUGGACACCGCA	UUCGGUGUCCAUGGAAGGAAC	Cleavage	cDNA|polygalacturonase, putative, expressed
									osa-miR5529	LOC_Os08g17410.1	2	1154	1174	GUUUCAUCCAUGGACACCGCA	GCUGGUGUCCAUGGGUGAGAU	Cleavage	cDNA|BRASSINOSTEROID INSENSITIVE 1 precursor, putative, expressed
									osa-miR5531	LOC_Os05g07220.1	2	3687	3708	ACUGACUGCCUUGAGCUCCGGG	UAUGGAGCUCUAGGUAGUCAGU	Cleavage	cDNA|kelch repeat-containing protein, putative, expressed
									osa-miR5531	LOC_Os05g07220.2	2	3530	3551	ACUGACUGCCUUGAGCUCCGGG	UAUGGAGCUCUAGGUAGUCAGU	Cleavage	cDNA|kelch repeat-containing protein, putative, expressed
									osa-miR5532	LOC_Os07g01950.1	2	604	625	AUGGAAUAUAUGACAAAGGUGG	UUUCCUUUUUUAUAUAUUUCAU	Cleavage	cDNA|expressed protein
									osa-miR5532	LOC_Os07g01950.2	2	682	703	AUGGAAUAUAUGACAAAGGUGG	UUUCCUUUUUUAUAUAUUUCAU	Cleavage	cDNA|expressed protein
									osa-miR5532	LOC_Os05g28860.1	2	1835	1856	AUGGAAUAUAUGACAAAGGUGG	GGUCCUUGUUCAUAUAUUCCAU	Cleavage	cDNA|3'-5' exonuclease, putative, expressed
									osa-miR5534b	LOC_Os07g35340.1	2	2282	2302	CGAUGACAACAGCUAGAAUGG	AUAUUCUAGUUGUUGUCAUUA	Cleavage	cDNA|TKL_IRAK_DUF26-lc.14 - DUF26 kinases have homology to DUF26 containing loci, expressed
									osa-miR5534b	LOC_Os07g35340.3	2	2296	2316	CGAUGACAACAGCUAGAAUGG	AUAUUCUAGUUGUUGUCAUUA	Cleavage	cDNA|TKL_IRAK_DUF26-lc.14 - DUF26 kinases have homology to DUF26 containing loci, expressed
									osa-miR5537	LOC_Os12g05080.1	2	1031	1052	AAUGUUUGUAUGGAUCGUUUGU	ACCAAAGAUCCAUGCAGACAUU	Cleavage	cDNA|PMR5, putative, expressed
									osa-miR5540	LOC_Os03g59560.1	2	196	216	UUGUGCGAGAUCGACGGUAUA	UAUACCGUCGGUGUCGCACAA	Cleavage	cDNA|hypothetical protein
									osa-miR5540	LOC_Os12g39940.1	2	515	535	UUGUGCGAGAUCGACGGUAUA	UAUACUAUCGGUCUCGCACAA	Cleavage	cDNA|retrotransposon protein, putative, unclassified, expressed
									osa-miR5542	LOC_Os03g45410.1	2	459	479	UUUGAGAAGGUAUCAUGAGAU	UUCUCAUGGUGCUUUCUCAAG	Cleavage	cDNA|TATA-binding protein, putative, expressed
									osa-miR5542	LOC_Os12g39070.1	2	579	599	UUUGAGAAGGUAUCAUGAGAU	UUCUCAUGGUGCUUUCUCAAG	Cleavage	cDNA|TATA-binding protein, putative, expressed
									osa-miR5542	LOC_Os05g35130.1	2	79	99	UUUGAGAAGGUAUCAUGAGAU	ACCUCAUGGUACCUACUCAAA	Cleavage	cDNA|retrotransposon protein, putative, unclassified
									osa-miR5542	LOC_Os04g31390.1	2	1881	1901	UUUGAGAAGGUAUCAUGAGAU	UGCUUAUGAUACCUUCUCCAA	Cleavage	cDNA|vacuolar protein sorting-associated protein 11, putative, expressed
									osa-miR5799	LOC_Os11g31690.1	2	1647	1670	AAGACGAAUAAUCAAACGUUGGAC	GUCCAACGUUUGAUUGUCCGUCUU	Cleavage	cDNA|expressed protein
									osa-miR5799	LOC_Os11g31690.2	2	1648	1671	AAGACGAAUAAUCAAACGUUGGAC	GUCCAACGUUUGAUUGUCCGUCUU	Cleavage	cDNA|expressed protein
									osa-miR5799	LOC_Os01g56720.1	2	769	792	AAGACGAAUAAUCAAACGUUGGAC	GUUCAACGUUUGAUCGUUCGUCUU	Translation	cDNA|expressed protein
									osa-miR5799	LOC_Os07g03467.1	2	939	962	AAGACGAAUAAUCAAACGUUGGAC	AACCAACGUUUGACUAUUCGUUUU	Translation	cDNA|SCP-like extracellular protein, expressed
									osa-miR5799	LOC_Os04g33780.2	2	1514	1537	AAGACGAAUAAUCAAACGUUGGAC	UGUCAAUGUUUGAUCAUUCGUCUU	Translation	cDNA|OTU-like cysteine protease family protein, putative, expressed
									osa-miR5799	LOC_Os04g33780.1	2	2628	2651	AAGACGAAUAAUCAAACGUUGGAC	UGUCAAUGUUUGAUCAUUCGUCUU	Translation	cDNA|OTU-like cysteine protease family protein, putative, expressed
									osa-miR5799	LOC_Os04g09900.2	2	193	216	AAGACGAAUAAUCAAACGUUGGAC	ACACAACGUUUGACUAUUUGUCUU	Translation	cDNA|ent-kaurene synthase, chloroplast precursor, putative, expressed
									osa-miR5799	LOC_Os12g16350.13	2	3102	3125	AAGACGAAUAAUCAAACGUUGGAC	AACACAUGUUUGAUCAUUCGUCUU	Translation	cDNA|enoyl-CoA hydratase/isomerase family protein, putative, expressed
									osa-miR5806	LOC_Os01g29390.1	2	1073	1093	ACAGGCAAAGACAAUGACGGC	UAAGUCAUUGUCUUUGUUUGU	Cleavage	cDNA|expressed protein
									osa-miR5806	LOC_Os01g29390.2	2	1461	1481	ACAGGCAAAGACAAUGACGGC	UAAGUCAUUGUCUUUGUUUGU	Cleavage	cDNA|expressed protein
									osa-miR5807	LOC_Os03g26390.1	2	5259	5282	AGGAGGUCUGGAGAGUUAUGUGGC	AGCAGAUAACGCUCCAGACUUCUU	Cleavage	cDNA|retrotransposon protein, putative, Ty3-gypsy subclass, expressed
									osa-miR5809	LOC_Os05g41510.1	2	5724	5743	UCGUCGCCGGCGACCACAGC	GCGGUGGUCGCCGGCGGCGG	Cleavage	cDNA|SH2 motif, putative, expressed
									osa-miR5809	LOC_Os12g44220.1	2	158	177	UCGUCGCCGGCGACCACAGC	GCUGUGGUCGGCGGCGGCGA	Translation	cDNA|ATPase 2, putative, expressed
									osa-miR5809	LOC_Os12g44220.2	2	158	177	UCGUCGCCGGCGACCACAGC	GCUGUGGUCGGCGGCGGCGA	Translation	cDNA|ATPase 2, putative, expressed
									osa-miR5809	LOC_Os11g36760.1	2	2467	2486	UCGUCGCCGGCGACCACAGC	GAGGUGGUCGCCGGCGACGA	Cleavage	cDNA|transmembrane receptor, putative, expressed
									osa-miR5809	LOC_Os01g24880.2	2	385	404	UCGUCGCCGGCGACCACAGC	GCGGUGGUCGCCGGCGGCGG	Cleavage	cDNA|zinc finger, C3HC4 type domain containing protein, expressed
									osa-miR5809	LOC_Os01g24880.1	2	385	404	UCGUCGCCGGCGACCACAGC	GCGGUGGUCGCCGGCGGCGG	Cleavage	cDNA|zinc finger, C3HC4 type domain containing protein, expressed
									osa-miR5809	LOC_Os02g10480.5	2	1470	1489	UCGUCGCCGGCGACCACAGC	GUCGUGGUCGCCGGCGGCGA	Cleavage	cDNA|stromal membrane-associated protein, putative, expressed
									osa-miR5809	LOC_Os09g04210.1	2	55	74	UCGUCGCCGGCGACCACAGC	GCUGUAGUCGCCGGCGGCGG	Cleavage	cDNA|hydrolase/ zinc ion binding protein, putative, expressed
									osa-miR5809	LOC_Os02g10480.6	2	1335	1354	UCGUCGCCGGCGACCACAGC	GUCGUGGUCGCCGGCGGCGA	Cleavage	cDNA|stromal membrane-associated protein, putative, expressed
									osa-miR5809	LOC_Os02g10480.2	2	1302	1321	UCGUCGCCGGCGACCACAGC	GUCGUGGUCGCCGGCGGCGA	Cleavage	cDNA|stromal membrane-associated protein, putative, expressed
									osa-miR5809	LOC_Os02g57810.1	2	1225	1244	UCGUCGCCGGCGACCACAGC	GUGGUGGUCGCCGGCGACGG	Cleavage	cDNA|cytochrome P450, putative, expressed
									osa-miR5809	LOC_Os09g24490.1	2	1076	1095	UCGUCGCCGGCGACCACAGC	GCUGUCGUCGCCGGCGGCGG	Cleavage	cDNA|basic helix-loop-helix family protein, putative, expressed
									osa-miR5809	LOC_Os02g10480.3	2	1133	1152	UCGUCGCCGGCGACCACAGC	GUCGUGGUCGCCGGCGGCGA	Cleavage	cDNA|stromal membrane-associated protein, putative, expressed
									osa-miR5809	LOC_Os02g10480.4	2	1129	1148	UCGUCGCCGGCGACCACAGC	GUCGUGGUCGCCGGCGGCGA	Cleavage	cDNA|stromal membrane-associated protein, putative, expressed
									osa-miR5809	LOC_Os02g10480.1	2	999	1018	UCGUCGCCGGCGACCACAGC	GUCGUGGUCGCCGGCGGCGA	Cleavage	cDNA|stromal membrane-associated protein, putative, expressed
									osa-miR5809	LOC_Os02g13930.1	2	2761	2780	UCGUCGCCGGCGACCACAGC	GCCGUGCUCGCCGGCGACGA	Cleavage	cDNA|expressed protein
									osa-miR5809	LOC_Os10g08610.1	2	688	707	UCGUCGCCGGCGACCACAGC	GCCGUGGUUGCCGGCGAUGA	Cleavage	cDNA|expressed protein
									osa-miR5809	LOC_Os10g29320.1	2	931	950	UCGUCGCCGGCGACCACAGC	GCUGUCGUCGCCGGUGACGG	Cleavage	cDNA|speckle-type POZ protein, putative, expressed
									osa-miR5809	LOC_Os01g63610.1	2	1164	1183	UCGUCGCCGGCGACCACAGC	CCUAUGGUCGCCGGCGGCGG	Cleavage	cDNA|retrotransposon protein, putative, unclassified, expressed
									osa-miR5809	LOC_Os12g36920.1	2	217	236	UCGUCGCCGGCGACCACAGC	GCUGGCGUCGCCGGCGACGA	Cleavage	cDNA|calmodulin binding protein, putative, expressed
									osa-miR5809	LOC_Os02g33580.1	2	551	570	UCGUCGCCGGCGACCACAGC	CCUGAGGUCGCCGGCGGCGG	Cleavage	cDNA|digalactosyldiacylglycerol synthase, chloroplast precursor, putative, expressed
									osa-miR5809	LOC_Os12g25040.1	2	34	53	UCGUCGCCGGCGACCACAGC	CCUAUGGUCGCCGGCGGCGG	Cleavage	cDNA|retrotransposon protein, putative, unclassified, expressed
									osa-miR5809	LOC_Os07g26360.1	2	37	56	UCGUCGCCGGCGACCACAGC	CCUAUGGUCGCCGGCGGCGG	Cleavage	cDNA|retrotransposon protein, putative, Ty3-gypsy subclass, expressed
									osa-miR5809	LOC_Os04g56939.1	2	122	141	UCGUCGCCGGCGACCACAGC	GCUGUCGUCGCCGGCGGCGG	Cleavage	cDNA|expressed protein
									osa-miR5809	LOC_Os10g11270.1	2	74	93	UCGUCGCCGGCGACCACAGC	GCGGUCGUCGCCGGCGACGA	Cleavage	cDNA|sulfotransferase domain containing protein, expressed
									osa-miR5809	LOC_Os11g12410.1	2	262	281	UCGUCGCCGGCGACCACAGC	CUUGUGCUCGCCGGCGGCGA	Cleavage	cDNA|serpin domain containing protein, putative, expressed
									osa-miR5809	LOC_Os11g12420.1	2	142	161	UCGUCGCCGGCGACCACAGC	CUUGUGCUCGCCGGCGGCGA	Cleavage	cDNA|serpin domain containing protein, putative, expressed
									osa-miR5809	LOC_Os03g11930.1	2	327	346	UCGUCGCCGGCGACCACAGC	GCGGUGGUCGUCGGCGACGG	Cleavage	cDNA|expressed protein
									osa-miR5809	LOC_Os01g02110.1	2	539	558	UCGUCGCCGGCGACCACAGC	UCUGUCGUCGCCGGCGGCGG	Cleavage	cDNA|helix-loop-helix DNA-binding domain containing protein, expressed
									osa-miR5809	LOC_Os03g39850.1	2	538	556	UCGUCGCCGGCGACCACAGC	GCU-UGGUCGCCGGCGACGA	Cleavage	cDNA|glutathione S-transferase, putative, expressed
									osa-miR5809	LOC_Os06g31170.1	2	694	713	UCGUCGCCGGCGACCACAGC	CCUAUGGUCGCCGGCGGCGG	Cleavage	cDNA|retrotransposon protein, putative, unclassified, expressed
									osa-miR5809	LOC_Os12g10030.1	2	43	62	UCGUCGCCGGCGACCACAGC	CCUAUGGUCGCCGGCGGCGG	Cleavage	cDNA|retrotransposon protein, putative, unclassified, expressed
									osa-miR5809	LOC_Os02g39750.1	2	375	394	UCGUCGCCGGCGACCACAGC	ACGGUGGUCGUCGGCGGCGA	Cleavage	cDNA|inorganic phosphate transporter, putative, expressed
									osa-miR5809	LOC_Os08g15130.1	2	500	519	UCGUCGCCGGCGACCACAGC	CCGGUGGUCGCCGGCGGCGG	Cleavage	cDNA|retrotransposon, putative, centromere-specific
									osa-miR5809	LOC_Os05g33800.1	2	449	468	UCGUCGCCGGCGACCACAGC	CCGGUGGUCGCCGGCGGCGG	Cleavage	cDNA|retrotransposon, putative, centromere-specific, expressed
									osa-miR5815	LOC_Os12g24080.1	2	3286	3309	AAUGUUAUGGACACUAGAUGACAU	CAACUAUUUGGUGUUCAUAAUAUU	Cleavage	cDNA|HECT-domain domain containing protein, expressed
									osa-miR5816	LOC_Os11g18110.1	2	727	750	UAGGAGUGUUUGUAGGAGCGCCAC	UUAAACUUCCUACAAACGCUCCUA	Cleavage	cDNA|POT family protein, expressed
									osa-miR5817	LOC_Os03g44580.1	2	615	638	AUCGAAUUUGAAAGAAAAAGGUAU	AUCCUUUUUUUUUUCAAUUUCGAU	Cleavage	cDNA|DNA binding protein, putative, expressed
									osa-miR5817	LOC_Os03g44580.3	2	604	627	AUCGAAUUUGAAAGAAAAAGGUAU	AUCCUUUUUUUUUUCAAUUUCGAU	Cleavage	cDNA|DNA binding protein, putative, expressed
									osa-miR5819	LOC_Os12g40550.1	2	104	124	AGGACGAGGGGAACGGCGGCG	CGCCGCCGUCCUCCUCGUCCU	Cleavage	cDNA|peptidase, putative, expressed
									osa-miR5819	LOC_Os05g40130.1	2	247	267	AGGACGAGGGGAACGGCGGCG	CGCCGCUGUUCCACUCGUCCU	Cleavage	cDNA|expressed protein
									osa-miR5819	LOC_Os04g50890.1	2	91	111	AGGACGAGGGGAACGGCGGCG	ACCCGCCGUUCUCCUCCUCCU	Cleavage	cDNA|secretory carrier-associated membrane protein, putative, expressed
									osa-miR5820	LOC_Os01g70190.1	2	833	853	UGGCAGAGAUUGAUCGAGGAA	CACCUCGAUCAAUCUUUGUCU	Cleavage	cDNA|exostosin family domain containing protein, expressed
									osa-miR5820	LOC_Os05g07050.1	2	7424	7444	UGGCAGAGAUUGAUCGAGGAA	CCUCACGAUCAAUCUCUGCCG	Cleavage	cDNA|pre-mRNA-processing-splicing factor 8, putative, expressed
									osa-miR5821	LOC_Os03g03490.1	2	1045	1065	UGGACGGAGCGAUGGUGGGCG	CGCCCGCCAUCGCUCCGCCCA	Cleavage	cDNA|expressed protein
									osa-miR5825	LOC_Os09g28710.1	2	839	862	AAAACAUCUGAUAACCUGAAACGG	UAGUUUUAGGUUAUAAGAUGUUUU	Translation	cDNA|expressed protein
									osa-miR5831	LOC_Os02g12654.2	2	1265	1288	UAGUCAAACUUAGAAUAGUUGGAC	GUCAAACUGUUGUAAGUUUGACUA	Cleavage	cDNA|expressed protein
									osa-miR5832	LOC_Os01g72120.1	2	232	252	UUGGCGGAGCGGUUGCUGUCA	CCACGGCGACCGCUCCGCCAU	Cleavage	cDNA|glutathione S-transferase, putative, expressed
									osa-miR5832	LOC_Os06g46910.1	2	886	906	UUGGCGGAGCGGUUGCUGUCA	CUGCGGCGACCGCUUCGCCAA	Cleavage	cDNA|ZOS6-07 - C2H2 zinc finger protein, expressed
									osa-miR5832	LOC_Os12g35710.1	2	675	695	UUGGCGGAGCGGUUGCUGUCA	CAACAGCAACCGCUUCGUCGG	Cleavage	cDNA|uncharacterized protein At4g06744 precursor, putative, expressed
									osa-miR5832	LOC_Os06g46910.2	2	855	875	UUGGCGGAGCGGUUGCUGUCA	CUGCGGCGACCGCUUCGCCAA	Cleavage	cDNA|ZOS6-07 - C2H2 zinc finger protein, expressed
									osa-miR5837.1	LOC_Os06g29650.1	2	172	192	AUGUUGGAAUGACAUGCAGCU	UGCUGUAUGUUAUUCCAACAG	Cleavage	cDNA|CDP-diacylglycerol--inositol 3-phosphatidyltransferase 1, putative, expressed
									osa-miR6245	LOC_Os07g17184.1	2	1040	1060	AGUAUAGGUGUCGGCUCUAUU	AAUAGAACCGAUACCUAUAUU	Cleavage	cDNA|expressed protein
									osa-miR6248	LOC_Os03g52180.1	2	991	1011	UAUUUGAGGAUGGAGGUAGUA	UACUACCUCCGUCCUAAAAUA	Cleavage	cDNA|4-hydroxy-3-methylbut-2-enyl diphosphate reductase, putative, expressed
									osa-miR6248	LOC_Os03g55040.1	2	1896	1916	UAUUUGAGGAUGGAGGUAGUA	UACUACCUCUGUUUUCAAAUA	Cleavage	cDNA|UDP-glucoronosyl and UDP-glucosyl transferase domain containing protein, expressed
									osa-miR6248	LOC_Os03g22050.4	2	1880	1900	UAUUUGAGGAUGGAGGUAGUA	UACUACCUCCGUCCUAAAAUA	Cleavage	cDNA|CAMK_KIN1/SNF1/Nim1_like.16 - CAMK includes calcium/calmodulin depedent protein kinases, expressed
									osa-miR6248	LOC_Os09g40000.2	2	1391	1411	UAUUUGAGGAUGGAGGUAGUA	UACUACCUCCGUCCUAAAAUA	Cleavage	cDNA|AGAP005770-PA, putative, expressed
									osa-miR6248	LOC_Os03g22050.3	2	2835	2855	UAUUUGAGGAUGGAGGUAGUA	UACUACCUCCGUCCUAAAAUA	Cleavage	cDNA|CAMK_KIN1/SNF1/Nim1_like.16 - CAMK includes calcium/calmodulin depedent protein kinases, expressed
									osa-miR6248	LOC_Os03g22050.2	2	2866	2886	UAUUUGAGGAUGGAGGUAGUA	UACUACCUCCGUCCUAAAAUA	Cleavage	cDNA|CAMK_KIN1/SNF1/Nim1_like.16 - CAMK includes calcium/calmodulin depedent protein kinases, expressed
									osa-miR6248	LOC_Os03g22050.1	2	2872	2892	UAUUUGAGGAUGGAGGUAGUA	UACUACCUCCGUCCUAAAAUA	Cleavage	cDNA|CAMK_KIN1/SNF1/Nim1_like.16 - CAMK includes calcium/calmodulin depedent protein kinases, expressed
									osa-miR6248	LOC_Os04g59624.1	2	2133	2153	UAUUUGAGGAUGGAGGUAGUA	UACUCCCUCCGUCCUUAAAUA	Cleavage	cDNA|SNF2 family N-terminal domain containing protein, expressed
									osa-miR6248	LOC_Os04g59624.2	2	3322	3342	UAUUUGAGGAUGGAGGUAGUA	UACUCCCUCCGUCCUUAAAUA	Cleavage	cDNA|SNF2 family N-terminal domain containing protein, expressed
									osa-miR6248	LOC_Os04g59624.3	2	3391	3411	UAUUUGAGGAUGGAGGUAGUA	UACUCCCUCCGUCCUUAAAUA	Cleavage	cDNA|SNF2 family N-terminal domain containing protein, expressed
									osa-miR6248	LOC_Os02g07960.3	2	3600	3620	UAUUUGAGGAUGGAGGUAGUA	UGCUACCUCCGUCCUAAAAUA	Cleavage	cDNA|STRUBBELIG-RECEPTOR FAMILY 3 precursor, putative, expressed
									osa-miR6248	LOC_Os02g07960.2	2	3704	3724	UAUUUGAGGAUGGAGGUAGUA	UGCUACCUCCGUCCUAAAAUA	Cleavage	cDNA|STRUBBELIG-RECEPTOR FAMILY 3 precursor, putative, expressed
									osa-miR6248	LOC_Os02g07960.4	2	5338	5358	UAUUUGAGGAUGGAGGUAGUA	UGCUACCUCCGUCCUAAAAUA	Cleavage	cDNA|STRUBBELIG-RECEPTOR FAMILY 3 precursor, putative, expressed
									osa-miR6249a	LOC_Os03g44740.1	2	323	342	CGUGAAGAGCUCGCCGGCGG	CCGCCGGCGAGCUCGUCGCG	Cleavage	cDNA|cytochrome P450, putative, expressed
									osa-miR6249a	LOC_Os10g25380.1	2	212	231	CGUGAAGAGCUCGCCGGCGG	CCGCCGGCGGGCCCUUCACG	Cleavage	cDNA|GDSL-like lipase/acylhydrolase, putative, expressed
									osa-miR6249a	LOC_Os11g44940.1	2	164	183	CGUGAAGAGCUCGCCGGCGG	CCGCCGGCGUGCUCUUCGCG	Translation	cDNA|seed maturation protein PM27, putative, expressed
									osa-miR6249a	LOC_Os04g56330.1	2	740	759	CGUGAAGAGCUCGCCGGCGG	UCGCCGGCGCGCUCUUCAUG	Translation	cDNA|ABC transporter, ATP-binding protein, putative, expressed
									osa-miR6249a	LOC_Os04g36040.1	2	890	909	CGUGAAGAGCUCGCCGGCGG	GCGCCGGCGAGCUCGUCGCG	Cleavage	cDNA|peptide transporter PTR2, putative, expressed
									osa-miR6249a	LOC_Os03g47860.1	2	1001	1020	CGUGAAGAGCUCGCCGGCGG	ACGCCGGCGAGCUCGUCGCG	Cleavage	cDNA|transferase family protein, putative, expressed
									osa-miR6249a	LOC_Os01g55440.1	2	416	435	CGUGAAGAGCUCGCCGGCGG	GCGGCGGCGAGCUCUUCACC	Cleavage	cDNA|CAMK_KIN1/SNF1/Nim1_like.1 - CAMK includes calcium/calmodulin depedent protein kinases, expressed
									osa-miR6249a	LOC_Os01g68650.1	2	875	894	CGUGAAGAGCUCGCCGGCGG	GCGCCGUCGGGUUCUUCACG	Cleavage	cDNA|plant-specific domain TIGR01615 family protein, expressed
									osa-miR6249b	LOC_Os03g44740.1	2	323	342	CGUGAAGAGCUCGCCGGCGG	CCGCCGGCGAGCUCGUCGCG	Cleavage	cDNA|cytochrome P450, putative, expressed
									osa-miR6249b	LOC_Os10g25380.1	2	212	231	CGUGAAGAGCUCGCCGGCGG	CCGCCGGCGGGCCCUUCACG	Cleavage	cDNA|GDSL-like lipase/acylhydrolase, putative, expressed
									osa-miR6249b	LOC_Os11g44940.1	2	164	183	CGUGAAGAGCUCGCCGGCGG	CCGCCGGCGUGCUCUUCGCG	Translation	cDNA|seed maturation protein PM27, putative, expressed
									osa-miR6249b	LOC_Os04g56330.1	2	740	759	CGUGAAGAGCUCGCCGGCGG	UCGCCGGCGCGCUCUUCAUG	Translation	cDNA|ABC transporter, ATP-binding protein, putative, expressed
									osa-miR6249b	LOC_Os04g36040.1	2	890	909	CGUGAAGAGCUCGCCGGCGG	GCGCCGGCGAGCUCGUCGCG	Cleavage	cDNA|peptide transporter PTR2, putative, expressed
									osa-miR6249b	LOC_Os03g47860.1	2	1001	1020	CGUGAAGAGCUCGCCGGCGG	ACGCCGGCGAGCUCGUCGCG	Cleavage	cDNA|transferase family protein, putative, expressed
									osa-miR6249b	LOC_Os01g55440.1	2	416	435	CGUGAAGAGCUCGCCGGCGG	GCGGCGGCGAGCUCUUCACC	Cleavage	cDNA|CAMK_KIN1/SNF1/Nim1_like.1 - CAMK includes calcium/calmodulin depedent protein kinases, expressed
									osa-miR6249b	LOC_Os01g68650.1	2	875	894	CGUGAAGAGCUCGCCGGCGG	GCGCCGUCGGGUUCUUCACG	Cleavage	cDNA|plant-specific domain TIGR01615 family protein, expressed
									osa-miR7694-3p	LOC_Os03g47960.1	2	877	898	CCAUAUUCGUAGUGCUAGGUGG	UAUCCUAGUACUACGAAUCUGG	Cleavage	cDNA|expressed protein
									osa-miR7694-3p	LOC_Os03g17920.3	2	3133	3154	CCAUAUUCGUAGUGCUAGGUGG	UUUCCUAGUACUACGAAUCUGG	Cleavage	cDNA|RNA pseudouridine synthase, putative, expressed
									osa-miR7695-3p	LOC_Os12g10910.1	2	882	902	ACGUGAUGUGCCACGUAGGCA	CGUCUACGUGGCGUGUCACGU	Cleavage	cDNA|A/G-specific adenine DNA glycosylase, putative, expressed
									osa-miR812a	LOC_Os10g10170.6	2	1286	1307	GACGGACGGUUAAACGUUGGAC	GUCCAACGUUUGACCGUCCAUC	Cleavage	cDNA|PPR repeat domain containing protein, putative, expressed
									osa-miR812a	LOC_Os04g33720.1	2	1952	1973	GACGGACGGUUAAACGUUGGAC	GUCCAACAUUUGACCGUUCGUC	Cleavage	cDNA|glycosyl hydrolases, putative, expressed
									osa-miR812a	LOC_Os04g20474.3	2	1947	1968	GACGGACGGUUAAACGUUGGAC	GUUCAAUGUUUGGCCGUUCGUC	Cleavage	cDNA|UDP-glucoronosyl and UDP-glucosyl transferase domain containing protein, expressed
									osa-miR812a	LOC_Os04g20474.4	2	2189	2210	GACGGACGGUUAAACGUUGGAC	GUUCAAUGUUUGGCCGUUCGUC	Cleavage	cDNA|UDP-glucoronosyl and UDP-glucosyl transferase domain containing protein, expressed
									osa-miR812a	LOC_Os04g20474.2	2	2285	2306	GACGGACGGUUAAACGUUGGAC	GUUCAAUGUUUGGCCGUUCGUC	Cleavage	cDNA|UDP-glucoronosyl and UDP-glucosyl transferase domain containing protein, expressed
									osa-miR812a	LOC_Os04g20474.1	2	2416	2437	GACGGACGGUUAAACGUUGGAC	GUUCAAUGUUUGGCCGUUCGUC	Cleavage	cDNA|UDP-glucoronosyl and UDP-glucosyl transferase domain containing protein, expressed
									osa-miR812a	LOC_Os11g37540.1	2	3837	3858	GACGGACGGUUAAACGUUGGAC	AUCCAACGUUUCACCGUUCGUC	Translation	cDNA|protein phosphatase 2C, putative, expressed
									osa-miR812a	LOC_Os10g07340.1	2	977	998	GACGGACGGUUAAACGUUGGAC	GCCCAAUGUUUUACCGUCCGUC	Translation	cDNA|expressed protein
									osa-miR812b	LOC_Os10g10170.6	2	1286	1307	GACGGACGGUUAAACGUUGGAC	GUCCAACGUUUGACCGUCCAUC	Cleavage	cDNA|PPR repeat domain containing protein, putative, expressed
									osa-miR812b	LOC_Os04g33720.1	2	1952	1973	GACGGACGGUUAAACGUUGGAC	GUCCAACAUUUGACCGUUCGUC	Cleavage	cDNA|glycosyl hydrolases, putative, expressed
									osa-miR812b	LOC_Os04g20474.3	2	1947	1968	GACGGACGGUUAAACGUUGGAC	GUUCAAUGUUUGGCCGUUCGUC	Cleavage	cDNA|UDP-glucoronosyl and UDP-glucosyl transferase domain containing protein, expressed
									osa-miR812b	LOC_Os04g20474.4	2	2189	2210	GACGGACGGUUAAACGUUGGAC	GUUCAAUGUUUGGCCGUUCGUC	Cleavage	cDNA|UDP-glucoronosyl and UDP-glucosyl transferase domain containing protein, expressed
									osa-miR812b	LOC_Os04g20474.2	2	2285	2306	GACGGACGGUUAAACGUUGGAC	GUUCAAUGUUUGGCCGUUCGUC	Cleavage	cDNA|UDP-glucoronosyl and UDP-glucosyl transferase domain containing protein, expressed
									osa-miR812b	LOC_Os04g20474.1	2	2416	2437	GACGGACGGUUAAACGUUGGAC	GUUCAAUGUUUGGCCGUUCGUC	Cleavage	cDNA|UDP-glucoronosyl and UDP-glucosyl transferase domain containing protein, expressed
									osa-miR812b	LOC_Os11g37540.1	2	3837	3858	GACGGACGGUUAAACGUUGGAC	AUCCAACGUUUCACCGUUCGUC	Translation	cDNA|protein phosphatase 2C, putative, expressed
									osa-miR812b	LOC_Os10g07340.1	2	977	998	GACGGACGGUUAAACGUUGGAC	GCCCAAUGUUUUACCGUCCGUC	Translation	cDNA|expressed protein
									osa-miR812c	LOC_Os10g10170.6	2	1286	1307	GACGGACGGUUAAACGUUGGAC	GUCCAACGUUUGACCGUCCAUC	Cleavage	cDNA|PPR repeat domain containing protein, putative, expressed
									osa-miR812c	LOC_Os04g33720.1	2	1952	1973	GACGGACGGUUAAACGUUGGAC	GUCCAACAUUUGACCGUUCGUC	Cleavage	cDNA|glycosyl hydrolases, putative, expressed
									osa-miR812c	LOC_Os04g20474.3	2	1947	1968	GACGGACGGUUAAACGUUGGAC	GUUCAAUGUUUGGCCGUUCGUC	Cleavage	cDNA|UDP-glucoronosyl and UDP-glucosyl transferase domain containing protein, expressed
									osa-miR812c	LOC_Os04g20474.4	2	2189	2210	GACGGACGGUUAAACGUUGGAC	GUUCAAUGUUUGGCCGUUCGUC	Cleavage	cDNA|UDP-glucoronosyl and UDP-glucosyl transferase domain containing protein, expressed
									osa-miR812c	LOC_Os04g20474.2	2	2285	2306	GACGGACGGUUAAACGUUGGAC	GUUCAAUGUUUGGCCGUUCGUC	Cleavage	cDNA|UDP-glucoronosyl and UDP-glucosyl transferase domain containing protein, expressed
									osa-miR812c	LOC_Os04g20474.1	2	2416	2437	GACGGACGGUUAAACGUUGGAC	GUUCAAUGUUUGGCCGUUCGUC	Cleavage	cDNA|UDP-glucoronosyl and UDP-glucosyl transferase domain containing protein, expressed
									osa-miR812c	LOC_Os11g37540.1	2	3837	3858	GACGGACGGUUAAACGUUGGAC	AUCCAACGUUUCACCGUUCGUC	Translation	cDNA|protein phosphatase 2C, putative, expressed
									osa-miR812c	LOC_Os10g07340.1	2	977	998	GACGGACGGUUAAACGUUGGAC	GCCCAAUGUUUUACCGUCCGUC	Translation	cDNA|expressed protein
									osa-miR812d	LOC_Os10g10170.6	2	1286	1307	GACGGACGGUUAAACGUUGGAC	GUCCAACGUUUGACCGUCCAUC	Cleavage	cDNA|PPR repeat domain containing protein, putative, expressed
									osa-miR812d	LOC_Os04g33720.1	2	1952	1973	GACGGACGGUUAAACGUUGGAC	GUCCAACAUUUGACCGUUCGUC	Cleavage	cDNA|glycosyl hydrolases, putative, expressed
									osa-miR812d	LOC_Os04g20474.3	2	1947	1968	GACGGACGGUUAAACGUUGGAC	GUUCAAUGUUUGGCCGUUCGUC	Cleavage	cDNA|UDP-glucoronosyl and UDP-glucosyl transferase domain containing protein, expressed
									osa-miR812d	LOC_Os04g20474.4	2	2189	2210	GACGGACGGUUAAACGUUGGAC	GUUCAAUGUUUGGCCGUUCGUC	Cleavage	cDNA|UDP-glucoronosyl and UDP-glucosyl transferase domain containing protein, expressed
									osa-miR812d	LOC_Os04g20474.2	2	2285	2306	GACGGACGGUUAAACGUUGGAC	GUUCAAUGUUUGGCCGUUCGUC	Cleavage	cDNA|UDP-glucoronosyl and UDP-glucosyl transferase domain containing protein, expressed
									osa-miR812d	LOC_Os04g20474.1	2	2416	2437	GACGGACGGUUAAACGUUGGAC	GUUCAAUGUUUGGCCGUUCGUC	Cleavage	cDNA|UDP-glucoronosyl and UDP-glucosyl transferase domain containing protein, expressed
									osa-miR812d	LOC_Os11g37540.1	2	3837	3858	GACGGACGGUUAAACGUUGGAC	AUCCAACGUUUCACCGUUCGUC	Translation	cDNA|protein phosphatase 2C, putative, expressed
									osa-miR812d	LOC_Os10g07340.1	2	977	998	GACGGACGGUUAAACGUUGGAC	GCCCAAUGUUUUACCGUCCGUC	Translation	cDNA|expressed protein
									osa-miR812e	LOC_Os10g10170.6	2	1286	1307	GACGGACGGUUAAACGUUGGAC	GUCCAACGUUUGACCGUCCAUC	Cleavage	cDNA|PPR repeat domain containing protein, putative, expressed
									osa-miR812e	LOC_Os04g33720.1	2	1952	1973	GACGGACGGUUAAACGUUGGAC	GUCCAACAUUUGACCGUUCGUC	Cleavage	cDNA|glycosyl hydrolases, putative, expressed
									osa-miR812e	LOC_Os04g20474.3	2	1947	1968	GACGGACGGUUAAACGUUGGAC	GUUCAAUGUUUGGCCGUUCGUC	Cleavage	cDNA|UDP-glucoronosyl and UDP-glucosyl transferase domain containing protein, expressed
									osa-miR812e	LOC_Os04g20474.4	2	2189	2210	GACGGACGGUUAAACGUUGGAC	GUUCAAUGUUUGGCCGUUCGUC	Cleavage	cDNA|UDP-glucoronosyl and UDP-glucosyl transferase domain containing protein, expressed
									osa-miR812e	LOC_Os04g20474.2	2	2285	2306	GACGGACGGUUAAACGUUGGAC	GUUCAAUGUUUGGCCGUUCGUC	Cleavage	cDNA|UDP-glucoronosyl and UDP-glucosyl transferase domain containing protein, expressed
									osa-miR812e	LOC_Os04g20474.1	2	2416	2437	GACGGACGGUUAAACGUUGGAC	GUUCAAUGUUUGGCCGUUCGUC	Cleavage	cDNA|UDP-glucoronosyl and UDP-glucosyl transferase domain containing protein, expressed
									osa-miR812e	LOC_Os11g37540.1	2	3837	3858	GACGGACGGUUAAACGUUGGAC	AUCCAACGUUUCACCGUUCGUC	Translation	cDNA|protein phosphatase 2C, putative, expressed
									osa-miR812e	LOC_Os10g07340.1	2	977	998	GACGGACGGUUAAACGUUGGAC	GCCCAAUGUUUUACCGUCCGUC	Translation	cDNA|expressed protein
									osa-miR812f	LOC_Os02g07960.4	2	5376	5399	ACGGAUGAUUAAAGUUGGACACGG	UUGCGUCCAACUUUAAUCGACCGU	Cleavage	cDNA|STRUBBELIG-RECEPTOR FAMILY 3 precursor, putative, expressed
									osa-miR812f	LOC_Os02g07960.3	2	3638	3661	ACGGAUGAUUAAAGUUGGACACGG	UUGCGUCCAACUUUAAUCGACCGU	Cleavage	cDNA|STRUBBELIG-RECEPTOR FAMILY 3 precursor, putative, expressed
									osa-miR812f	LOC_Os02g07960.2	2	3742	3765	ACGGAUGAUUAAAGUUGGACACGG	UUGCGUCCAACUUUAAUCGACCGU	Cleavage	cDNA|STRUBBELIG-RECEPTOR FAMILY 3 precursor, putative, expressed
									osa-miR812f	LOC_Os03g16220.4	2	1099	1122	ACGGAUGAUUAAAGUUGGACACGG	GUGUAUCCAACUUUAAUUUUCCGU	Cleavage	cDNA|oxidoreductase, short chain dehydrogenase/reductase family domain containing protein, expressed
									osa-miR812f	LOC_Os03g16220.6	2	1211	1234	ACGGAUGAUUAAAGUUGGACACGG	GUGUAUCCAACUUUAAUUUUCCGU	Cleavage	cDNA|oxidoreductase, short chain dehydrogenase/reductase family domain containing protein, expressed
									osa-miR812f	LOC_Os03g16220.1	2	1239	1262	ACGGAUGAUUAAAGUUGGACACGG	GUGUAUCCAACUUUAAUUUUCCGU	Cleavage	cDNA|oxidoreductase, short chain dehydrogenase/reductase family domain containing protein, expressed
									osa-miR812f	LOC_Os03g16220.2	2	1376	1399	ACGGAUGAUUAAAGUUGGACACGG	GUGUAUCCAACUUUAAUUUUCCGU	Cleavage	cDNA|oxidoreductase, short chain dehydrogenase/reductase family domain containing protein, expressed
									osa-miR812f	LOC_Os03g16220.3	2	1922	1945	ACGGAUGAUUAAAGUUGGACACGG	GUGUAUCCAACUUUAAUUUUCCGU	Cleavage	cDNA|oxidoreductase, short chain dehydrogenase/reductase family domain containing protein, expressed
									osa-miR812f	LOC_Os03g16220.5	2	2082	2105	ACGGAUGAUUAAAGUUGGACACGG	GUGUAUCCAACUUUAAUUUUCCGU	Cleavage	cDNA|oxidoreductase, short chain dehydrogenase/reductase family domain containing protein, expressed
									osa-miR812g	LOC_Os03g50620.1	2	1115	1138	AAGACGGAUGAUUAAAGUUGGACA	CGUUCAACUUUGACCAUCCGUCUU	Translation	cDNA|ATP binding protein, putative, expressed
									osa-miR812g	LOC_Os03g16220.4	2	1102	1125	AAGACGGAUGAUUAAAGUUGGACA	UAUCCAACUUUAAUUUUCCGUCUU	Cleavage	cDNA|oxidoreductase, short chain dehydrogenase/reductase family domain containing protein, expressed
									osa-miR812g	LOC_Os03g16220.6	2	1214	1237	AAGACGGAUGAUUAAAGUUGGACA	UAUCCAACUUUAAUUUUCCGUCUU	Cleavage	cDNA|oxidoreductase, short chain dehydrogenase/reductase family domain containing protein, expressed
									osa-miR812g	LOC_Os03g16220.1	2	1242	1265	AAGACGGAUGAUUAAAGUUGGACA	UAUCCAACUUUAAUUUUCCGUCUU	Cleavage	cDNA|oxidoreductase, short chain dehydrogenase/reductase family domain containing protein, expressed
									osa-miR812g	LOC_Os03g16220.2	2	1379	1402	AAGACGGAUGAUUAAAGUUGGACA	UAUCCAACUUUAAUUUUCCGUCUU	Cleavage	cDNA|oxidoreductase, short chain dehydrogenase/reductase family domain containing protein, expressed
									osa-miR812g	LOC_Os03g16220.3	2	1925	1948	AAGACGGAUGAUUAAAGUUGGACA	UAUCCAACUUUAAUUUUCCGUCUU	Cleavage	cDNA|oxidoreductase, short chain dehydrogenase/reductase family domain containing protein, expressed
									osa-miR812g	LOC_Os03g16220.5	2	2085	2108	AAGACGGAUGAUUAAAGUUGGACA	UAUCCAACUUUAAUUUUCCGUCUU	Cleavage	cDNA|oxidoreductase, short chain dehydrogenase/reductase family domain containing protein, expressed
									osa-miR812h	LOC_Os03g50620.1	2	1115	1138	AAGACGGAUGAUUAAAGUUGGACA	CGUUCAACUUUGACCAUCCGUCUU	Translation	cDNA|ATP binding protein, putative, expressed
									osa-miR812h	LOC_Os03g16220.4	2	1102	1125	AAGACGGAUGAUUAAAGUUGGACA	UAUCCAACUUUAAUUUUCCGUCUU	Cleavage	cDNA|oxidoreductase, short chain dehydrogenase/reductase family domain containing protein, expressed
									osa-miR812h	LOC_Os03g16220.6	2	1214	1237	AAGACGGAUGAUUAAAGUUGGACA	UAUCCAACUUUAAUUUUCCGUCUU	Cleavage	cDNA|oxidoreductase, short chain dehydrogenase/reductase family domain containing protein, expressed
									osa-miR812h	LOC_Os03g16220.1	2	1242	1265	AAGACGGAUGAUUAAAGUUGGACA	UAUCCAACUUUAAUUUUCCGUCUU	Cleavage	cDNA|oxidoreductase, short chain dehydrogenase/reductase family domain containing protein, expressed
									osa-miR812h	LOC_Os03g16220.2	2	1379	1402	AAGACGGAUGAUUAAAGUUGGACA	UAUCCAACUUUAAUUUUCCGUCUU	Cleavage	cDNA|oxidoreductase, short chain dehydrogenase/reductase family domain containing protein, expressed
									osa-miR812h	LOC_Os03g16220.3	2	1925	1948	AAGACGGAUGAUUAAAGUUGGACA	UAUCCAACUUUAAUUUUCCGUCUU	Cleavage	cDNA|oxidoreductase, short chain dehydrogenase/reductase family domain containing protein, expressed
									osa-miR812h	LOC_Os03g16220.5	2	2085	2108	AAGACGGAUGAUUAAAGUUGGACA	UAUCCAACUUUAAUUUUCCGUCUU	Cleavage	cDNA|oxidoreductase, short chain dehydrogenase/reductase family domain containing protein, expressed
									osa-miR812i	LOC_Os03g50620.1	2	1115	1138	AAGACGGAUGAUUAAAGUUGGACA	CGUUCAACUUUGACCAUCCGUCUU	Translation	cDNA|ATP binding protein, putative, expressed
									osa-miR812i	LOC_Os03g16220.4	2	1102	1125	AAGACGGAUGAUUAAAGUUGGACA	UAUCCAACUUUAAUUUUCCGUCUU	Cleavage	cDNA|oxidoreductase, short chain dehydrogenase/reductase family domain containing protein, expressed
									osa-miR812i	LOC_Os03g16220.6	2	1214	1237	AAGACGGAUGAUUAAAGUUGGACA	UAUCCAACUUUAAUUUUCCGUCUU	Cleavage	cDNA|oxidoreductase, short chain dehydrogenase/reductase family domain containing protein, expressed
									osa-miR812i	LOC_Os03g16220.1	2	1242	1265	AAGACGGAUGAUUAAAGUUGGACA	UAUCCAACUUUAAUUUUCCGUCUU	Cleavage	cDNA|oxidoreductase, short chain dehydrogenase/reductase family domain containing protein, expressed
									osa-miR812i	LOC_Os03g16220.2	2	1379	1402	AAGACGGAUGAUUAAAGUUGGACA	UAUCCAACUUUAAUUUUCCGUCUU	Cleavage	cDNA|oxidoreductase, short chain dehydrogenase/reductase family domain containing protein, expressed
									osa-miR812i	LOC_Os03g16220.3	2	1925	1948	AAGACGGAUGAUUAAAGUUGGACA	UAUCCAACUUUAAUUUUCCGUCUU	Cleavage	cDNA|oxidoreductase, short chain dehydrogenase/reductase family domain containing protein, expressed
									osa-miR812i	LOC_Os03g16220.5	2	2085	2108	AAGACGGAUGAUUAAAGUUGGACA	UAUCCAACUUUAAUUUUCCGUCUU	Cleavage	cDNA|oxidoreductase, short chain dehydrogenase/reductase family domain containing protein, expressed
									osa-miR812j	LOC_Os03g50620.1	2	1115	1138	AAGACGGAUGAUUAAAGUUGGACA	CGUUCAACUUUGACCAUCCGUCUU	Translation	cDNA|ATP binding protein, putative, expressed
									osa-miR812j	LOC_Os03g16220.4	2	1102	1125	AAGACGGAUGAUUAAAGUUGGACA	UAUCCAACUUUAAUUUUCCGUCUU	Cleavage	cDNA|oxidoreductase, short chain dehydrogenase/reductase family domain containing protein, expressed
									osa-miR812j	LOC_Os03g16220.6	2	1214	1237	AAGACGGAUGAUUAAAGUUGGACA	UAUCCAACUUUAAUUUUCCGUCUU	Cleavage	cDNA|oxidoreductase, short chain dehydrogenase/reductase family domain containing protein, expressed
									osa-miR812j	LOC_Os03g16220.1	2	1242	1265	AAGACGGAUGAUUAAAGUUGGACA	UAUCCAACUUUAAUUUUCCGUCUU	Cleavage	cDNA|oxidoreductase, short chain dehydrogenase/reductase family domain containing protein, expressed
									osa-miR812j	LOC_Os03g16220.2	2	1379	1402	AAGACGGAUGAUUAAAGUUGGACA	UAUCCAACUUUAAUUUUCCGUCUU	Cleavage	cDNA|oxidoreductase, short chain dehydrogenase/reductase family domain containing protein, expressed
									osa-miR812j	LOC_Os03g16220.3	2	1925	1948	AAGACGGAUGAUUAAAGUUGGACA	UAUCCAACUUUAAUUUUCCGUCUU	Cleavage	cDNA|oxidoreductase, short chain dehydrogenase/reductase family domain containing protein, expressed
									osa-miR812j	LOC_Os03g16220.5	2	2085	2108	AAGACGGAUGAUUAAAGUUGGACA	UAUCCAACUUUAAUUUUCCGUCUU	Cleavage	cDNA|oxidoreductase, short chain dehydrogenase/reductase family domain containing protein, expressed
									osa-miR812k	LOC_Os06g40784.1	2	327	350	ACGAACGGUUAAAGUUGGACGCGG	CUGUAUCCAACUUUGAACGUUCGU	Cleavage	cDNA|expressed protein
									osa-miR812l	LOC_Os06g40784.1	2	327	350	ACGAACGGUUAAAGUUGGACGCGG	CUGUAUCCAACUUUGAACGUUCGU	Cleavage	cDNA|expressed protein
									osa-miR812m	LOC_Os06g40784.1	2	327	350	ACGAACGGUUAAAGUUGGACGCGG	CUGUAUCCAACUUUGAACGUUCGU	Cleavage	cDNA|expressed protein
									osa-miR812n-5p	LOC_Os04g47140.1	2	812	835	AAGUGCAGCCAUGAGUUUCCGUGC	ACGUGGAAAACCAUGGCUGCACUU	Cleavage	cDNA|expressed protein
									osa-miR812n-5p	LOC_Os02g53180.2	2	1522	1545	AAGUGCAGCCAUGAGUUUCCGUGC	AUGCGGAAAACCAUGGCUGCACUU	Cleavage	cDNA|1-aminocyclopropane-1-carboxylate oxidase protein, putative, expressed
									osa-miR812s	LOC_Os01g71060.1	2	1247	1270	AAGACGGACAAUCAAACGUUGGAC	GUCCAAUGUUUGACUGUCCGUCUU	Translation	cDNA|xylanase inhibitor, putative, expressed
									osa-miR812s	LOC_Os01g56720.1	2	769	792	AAGACGGACAAUCAAACGUUGGAC	GUUCAACGUUUGAUCGUUCGUCUU	Translation	cDNA|expressed protein

## Sheet: Pokkali
Table S5: List of targeted miRNA and genes.
List of targeted miRNAs									List of targeted genes
miRNA_Acc.	Target_Acc.	Expectation	Target_start	Target_end	miRNA_aligned_fragment	Target_aligned_fragment	Inhibition		miRNA_Acc.	Target_Acc.	Expectation	Target_start	Target_end	miRNA_aligned_fragment	Target_aligned_fragment	Inhibition	Target_Desc.
osa-miR2873c	XLOC_037957	0.5	1618	1638	CAAAUGAAGUUGAGUUUGGAC	GACCAAACUCAACUUCGUUUG	Cleavage		osa-miR156k	LOC_Os11g30370.1	0	1090	1110	UGACAGAAGAGAGAGAGCACA	UGUGCUCUCUCUCUUCUGUCA	Cleavage	cDNA|OsSPL19 - SBP-box gene family member, expressed
osa-miR5152-3p	XLOC_037957	1	1577	1597	AGACCAUGCCUAUACCUACCA	AGGUAGGGAUAGGCAUGGUCU	Cleavage		osa-miR156k	LOC_Os09g32944.1	0	1033	1053	UGACAGAAGAGAGAGAGCACA	UGUGCUCUCUCUCUUCUGUCA	Cleavage	cDNA|OsSPL18 - SBP-box gene family member, expressed
osa-miR812o-5p	XLOC_045209	1	149	169	CGUGUUCAACGUUUGACUGUC	GACGGUCAAACGUUGGACACG	Cleavage		osa-miR156k	LOC_Os09g31438.1	0	808	828	UGACAGAAGAGAGAGAGCACA	UGUGCUCUCUCUCUUCUGUCA	Cleavage	cDNA|OsSPL17 - SBP-box gene family member, expressed
osa-miR397b	XLOC_000467	1.5	1070	1090	UUAUUGAGUGCAGCGUUGAUG	AUUCAACGUUGCAUUUAAUAA	Cleavage		osa-miR156k	LOC_Os08g41940.1	0	1053	1073	UGACAGAAGAGAGAGAGCACA	UGUGCUCUCUCUCUUCUGUCA	Cleavage	cDNA|OsSPL16 - SBP-box gene family member, expressed
osa-miR6248	XLOC_049851	1.5	954	974	UAUUUGAGGAUGGAGGUAGUA	UACUACCUCCAUCCUAAAAUA	Cleavage		osa-miR156k	LOC_Os08g39890.1	0	991	1011	UGACAGAAGAGAGAGAGCACA	UGUGCUCUCUCUCUUCUGUCA	Cleavage	cDNA|OsSPL14 - SBP-box gene family member, expressed
osa-miR1439	XLOC_005292	2	299	319	UUUUGGAACGGAGUGAGUAUU	GGUACUCCCUCCGUUUCGAAA	Cleavage		osa-miR156k	LOC_Os01g69830.1	0	1152	1172	UGACAGAAGAGAGAGAGCACA	UGUGCUCUCUCUCUUCUGUCA	Cleavage	cDNA|OsSPL2 - SBP-box gene family member, expressed
osa-miR172b	XLOC_018826	2	301	321	GGAAUCUUGAUGAUGCUGCAU	ACGCAGCAUCCUUAAGAUUCC	Translation		osa-miR156k	LOC_Os06g45310.1	0	853	873	UGACAGAAGAGAGAGAGCACA	CGUGCUCUCUCUCUUCUGUCA	Cleavage	cDNA|OsSPL11 - SBP-box gene family member, expressed
osa-miR2919	XLOC_043574	2	129	147	AAGGGGGGGGGGGGAAAGA	UUUUUCCCCUUUCCCCCUU	Cleavage		osa-miR156k	LOC_Os04g46580.1	0	817	837	UGACAGAAGAGAGAGAGCACA	GGUGCUCUCUCUCUUCUGUCA	Cleavage	cDNA|OsSPL7 - SBP-box gene family member, expressed
osa-miR156k	XLOC_048354	2.5	11	31	UGACAGAAGAGAGAGAGCACA	CUUCCUCUCUCUCUGCUGUCA	Cleavage		osa-miR156k	LOC_Os02g07780.1	0	986	1006	UGACAGAAGAGAGAGAGCACA	CGUGCUCUCUCUCUUCUGUCA	Cleavage	cDNA|OsSPL4 - SBP-box gene family member, expressed
osa-miR1862e	XLOC_043574	2.5	3194	3217	CUAGAUUUGUUUAUUUUGGGACGG	ACAUUUUGAGAUAAACAAGUCUAG	Cleavage		osa-miR156k	LOC_Os06g49010.3	0	1438	1458	UGACAGAAGAGAGAGAGCACA	CGUGCUCUCUCUCUUCUGUCA	Cleavage	cDNA|OsSPL12 - SBP-box gene family member, expressed
osa-miR2118h	XLOC_048354	2.5	4653	4674	UUCCUGAUGCCUCUCAUUCCUA	UGUGAUUGAGAGGCAUCAGUAA	Cleavage		osa-miR156k	LOC_Os06g49010.2	0	1493	1513	UGACAGAAGAGAGAGAGCACA	CGUGCUCUCUCUCUUCUGUCA	Cleavage	cDNA|OsSPL12 - SBP-box gene family member, expressed
osa-miR2118k	XLOC_048354	2.5	4653	4674	UUCCUGAUGCCUCUCAUUCCUA	UGUGAUUGAGAGGCAUCAGUAA	Cleavage		osa-miR156k	LOC_Os06g49010.4	0	1637	1657	UGACAGAAGAGAGAGAGCACA	CGUGCUCUCUCUCUUCUGUCA	Cleavage	cDNA|OsSPL12 - SBP-box gene family member, expressed
osa-miR5152-5p	XLOC_037957	2.5	1755	1775	GUAGGGAUAGGCAUGAUCUCU	AUAGACCAUGCCUAUACCUAC	Cleavage		osa-miR156k	LOC_Os06g49010.1	0	1685	1705	UGACAGAAGAGAGAGAGCACA	CGUGCUCUCUCUCUUCUGUCA	Cleavage	cDNA|OsSPL12 - SBP-box gene family member, expressed
osa-miR812f	XLOC_045209	2.5	7	30	ACGGAUGAUUAAAGUUGGACACGG	CCGUGUCCAACUUUGACUAUCCGU	Cleavage		osa-miR156k	LOC_Os06g49010.6	0	1841	1861	UGACAGAAGAGAGAGAGCACA	CGUGCUCUCUCUCUUCUGUCA	Cleavage	cDNA|OsSPL12 - SBP-box gene family member, expressed
osa-miR812g	XLOC_045209	2.5	10	33	AAGACGGAUGAUUAAAGUUGGACA	UGUCCAACUUUGACUAUCCGUCUU	Translation		osa-miR156k	LOC_Os06g49010.5	0	2017	2037	UGACAGAAGAGAGAGAGCACA	CGUGCUCUCUCUCUUCUGUCA	Cleavage	cDNA|OsSPL12 - SBP-box gene family member, expressed
osa-miR812h	XLOC_045209	2.5	10	33	AAGACGGAUGAUUAAAGUUGGACA	UGUCCAACUUUGACUAUCCGUCUU	Translation		osa-miR156k	LOC_Os02g07780.2	0	2220	2240	UGACAGAAGAGAGAGAGCACA	CGUGCUCUCUCUCUUCUGUCA	Cleavage	cDNA|OsSPL4 - SBP-box gene family member, expressed
osa-miR812i	XLOC_045209	2.5	10	33	AAGACGGAUGAUUAAAGUUGGACA	UGUCCAACUUUGACUAUCCGUCUU	Translation		osa-miR156k	LOC_Os02g04680.2	0	1961	1981	UGACAGAAGAGAGAGAGCACA	CAUGCUCUCUCUCUUCUGUCA	Cleavage	cDNA|OsSPL3 - SBP-box gene family member, expressed
osa-miR812j	XLOC_045209	2.5	10	33	AAGACGGAUGAUUAAAGUUGGACA	UGUCCAACUUUGACUAUCCGUCUU	Translation		osa-miR156k	LOC_Os02g04680.1	0	1964	1984	UGACAGAAGAGAGAGAGCACA	CAUGCUCUCUCUCUUCUGUCA	Cleavage	cDNA|OsSPL3 - SBP-box gene family member, expressed
osa-miR821a	XLOC_043574	2.5	4023	4046	AAGUCAUCAACAAAAAAGUUGAAU	AUACAACUUUGUUGUUGAUGAUUA	Cleavage		osa-miR166i-5p	LOC_Os03g44835.1	0	1345	1365	AAUGCAGUUUGAUCCAAGAUC	GAUCUUGGAUCAAACUGCAUU	Cleavage	cDNA|expressed protein
osa-miR821b	XLOC_043574	2.5	4023	4046	AAGUCAUCAACAAAAAAGUUGAAU	AUACAACUUUGUUGUUGAUGAUUA	Cleavage		osa-miR171e-5p	LOC_Os03g04300.1	0	2212	2232	UGUUGGCUCGGCUCACUCAGA	UCUGAGUGAGCCGAGCCAACA	Cleavage	cDNA|ankyrin repeat domain containing protein, expressed
osa-miR821c	XLOC_043574	2.5	4023	4046	AAGUCAUCAACAAAAAAGUUGAAU	AUACAACUUUGUUGUUGAUGAUUA	Cleavage		osa-miR1846a-5p	LOC_Os10g12320.1	0	76	96	AGUGAGGAGGCCGGGGCCGCU	GGCGGCCCCGGCCUCCUCACU	Cleavage	cDNA|expressed protein
osa-miR1436	XLOC_005292	3	302	322	ACAUUAUGGGACGGAGGGAGU	ACUCCCUCCGUUUCGAAAUGU	Cleavage		osa-miR1846a-5p	LOC_Os02g43950.1	0	76	96	AGUGAGGAGGCCGGGGCCGCU	GGCGGCCCCGGCCUCCUCACU	Cleavage	cDNA|expressed protein
osa-miR156b-3p	XLOC_057699	3	390	409	GCUCACUCUCUAUCUGUCAGC	GCUGACAGA-AGAGAGUGAGC	Cleavage		osa-miR1846c-5p	LOC_Os10g12320.1	0	76	96	AGUGAGGAGGCCGGGGCCGCU	GGCGGCCCCGGCCUCCUCACU	Cleavage	cDNA|expressed protein
osa-miR172a	XLOC_018826	3	301	321	AGAAUCUUGAUGAUGCUGCAU	ACGCAGCAUCCUUAAGAUUCC	Translation		osa-miR1846c-5p	LOC_Os02g43950.1	0	76	96	AGUGAGGAGGCCGGGGCCGCU	GGCGGCCCCGGCCUCCUCACU	Cleavage	cDNA|expressed protein
osa-miR172c	XLOC_018826	3	301	321	UGAAUCUUGAUGAUGCUGCAC	ACGCAGCAUCCUUAAGAUUCC	Translation		osa-miR1848	LOC_Os01g09212.1	0	364	384	CCUCGCCGGCGCGCGCGUGCA	UGCACGCGCGCGCCGGCGAGG	Cleavage	cDNA|retrotransposon protein, putative, Ty1-copia subclass, expressed
osa-miR172d-3p	XLOC_018826	3	301	321	AGAAUCUUGAUGAUGCUGCAU	ACGCAGCAUCCUUAAGAUUCC	Translation		osa-miR1862f	LOC_Os02g37694.1	0	1094	1113	AUGAGGUUGGUUUAUUUUGG	CCAAAAUAAACCAACCUCAU	Cleavage	cDNA|expressed protein
osa-miR2098-5p	XLOC_049851	3	852	871	UCCCGUGGAGGCAGCCGAUG	GAUUGUCUGCCUUCAUGGGG	Cleavage		osa-miR1862g	LOC_Os02g37694.1	0	1094	1113	AUGAGGUUGGUUUAUUUUGG	CCAAAAUAAACCAACCUCAU	Cleavage	cDNA|expressed protein
osa-miR2120	XLOC_048354	3	3942	3966	AAAG-AUCUUUAGUCCCGGUUGUUC	CACCAACCGGGACUAAAGAUGCUUU	Cleavage		osa-miR2092-5p	LOC_Os12g17710.1	0	927	947	CAACUGAAGUCGGUGUUUACU	AGUAAACACCGACUUCAGUUG	Cleavage	cDNA|expressed protein
osa-miR397a	XLOC_000467	3	1070	1090	UCAUUGAGUGCAGCGUUGAUG	AUUCAACGUUGCAUUUAAUAA	Cleavage		osa-miR2103	LOC_Os03g50830.1	0	131	152	UUUCCCUCUCCGUGCGCGCUCG	CGAGCGCGCACGGAGAGGGAAA	Cleavage	cDNA|expressed protein
osa-miR5076	XLOC_051299	3	713	734	GAAAUGGGAGCAGAGCAGGUUU	UAGCAUGAUCUGCUUUCAUUUC	Cleavage		osa-miR2120	LOC_Os11g35750.1	0	650	673	AAAGAUCUUUAGUCCCGGUUGUUC	UAAAAACCGGGACUAAAGAUCUUU	Cleavage	cDNA|expressed protein
osa-miR5499	XLOC_040333	3	509	529	GAAGGAAGAAUCGUUAUGGAA	UGCCGUAACAAUUCUUUUUUC	Cleavage		osa-miR2927	LOC_Os01g63930.1	0	1033	1055	UGUCGUCGUCGAUGGAGCCCAUG	CAUGGGCUCCAUCGACGACGACA	Cleavage	cDNA|cytochrome P450, putative, expressed
osa-miR5509	XLOC_035674	3	358	378	UAGGCAUUUUCUCUUGGCAUG	GUUGCCAAGACAGAAUGUCUG	Translation		osa-miR2927	LOC_Os01g63930.2	0	1033	1055	UGUCGUCGUCGAUGGAGCCCAUG	CAUGGGCUCCAUCGACGACGACA	Cleavage	cDNA|cytochrome P450, putative, expressed
osa-miR5820	XLOC_024018	3	14	34	UGGCAGAGAUUGAUCGAGGAA	AGCUUUGAUCGAUCUCUCCCA	Cleavage		osa-miR2930	LOC_Os06g14780.1	0	38	59	UUCUCUUCUCUCGCGCGUGGCC	GGCCACGCGCGAGAGAAGAGAA	Cleavage	cDNA|expressed protein
osa-miR818a	XLOC_049851	3	962	983	AAUCCCUUAUAUUAUGGGACGG	CCAUCCUAAAAUAUAAGUGAUU	Cleavage		osa-miR2930	LOC_Os06g14780.2	0	38	59	UUCUCUUCUCUCGCGCGUGGCC	GGCCACGCGCGAGAGAAGAGAA	Cleavage	cDNA|expressed protein
osa-miR818b	XLOC_049851	3	962	983	AAUCCCUUAUAUUAUGGGACGG	CCAUCCUAAAAUAUAAGUGAUU	Cleavage		osa-miR444a-3p.2	LOC_Os02g49840.1	0	613	633	UGCAGUUGCUGCCUCAAGCUU	AAGCUUGAGGCAGCAACUGCA	Cleavage	cDNA|OsMADS57 - MADS-box family gene with MIKCc type-box, expressed
osa-miR818c	XLOC_049851	3	962	983	AAUCCCUUAUAUUAUGGGACGG	CCAUCCUAAAAUAUAAGUGAUU	Cleavage		osa-miR444a-3p.2	LOC_Os02g49840.4	0	613	633	UGCAGUUGCUGCCUCAAGCUU	AAGCUUGAGGCAGCAACUGCA	Cleavage	cDNA|OsMADS57 - MADS-box family gene with MIKCc type-box, expressed
osa-miR818d	XLOC_049851	3	962	983	AAUCCCUUAUAUUAUGGGACGG	CCAUCCUAAAAUAUAAGUGAUU	Cleavage		osa-miR444a-3p.2	LOC_Os02g49840.2	0	613	633	UGCAGUUGCUGCCUCAAGCUU	AAGCUUGAGGCAGCAACUGCA	Cleavage	cDNA|OsMADS57 - MADS-box family gene with MIKCc type-box, expressed
osa-miR818e	XLOC_049851	3	962	983	AAUCCCUUAUAUUAUGGGACGG	CCAUCCUAAAAUAUAAGUGAUU	Cleavage		osa-miR444a-3p.2	LOC_Os02g49840.3	0	613	633	UGCAGUUGCUGCCUCAAGCUU	AAGCUUGAGGCAGCAACUGCA	Cleavage	cDNA|OsMADS57 - MADS-box family gene with MIKCc type-box, expressed
osa-miR1425-3p	XLOC_049782	3.5	1354	1374	CAGCAAGAACUGGAUCUUAAU	CCUUAGGUUUGGUUUUUGCUG	Cleavage		osa-miR444a-3p.2	LOC_Os08g33488.1	0	311	331	UGCAGUUGCUGCCUCAAGCUU	AAGCUUGAGGCAGCAACUGCA	Cleavage	cDNA|OsMADS23 - MADS-box family gene with MIKCc type-box, expressed
osa-miR156a	XLOC_048354	3.5	12	31	UGACAGAAGAGAGUGAGCAC	UUCCUCUCUCUCUGCUGUCA	Cleavage		osa-miR444b.1	LOC_Os02g36924.1	0	558	578	UGUUGUCUCAAGCUUGCUGCC	GGCAGCAAGCUUGAGACAACA	Cleavage	cDNA|OsMADS27 - MADS-box family gene with MIKCc type-box, expressed
osa-miR156b-5p	XLOC_048354	3.5	12	31	UGACAGAAGAGAGUGAGCAC	UUCCUCUCUCUCUGCUGUCA	Cleavage		osa-miR444b.1	LOC_Os04g38780.1	0	91	111	UGUUGUCUCAAGCUUGCUGCC	GGCAGCAAGCUUGAGACAACA	Cleavage	cDNA|transcription factor, putative, expressed
osa-miR156c-5p	XLOC_048354	3.5	12	31	UGACAGAAGAGAGUGAGCAC	UUCCUCUCUCUCUGCUGUCA	Cleavage		osa-miR444b.2	LOC_Os04g38780.1	0	97	117	UGCAGUUGUUGUCUCAAGCUU	AAGCUUGAGACAACAACUGCA	Cleavage	cDNA|transcription factor, putative, expressed
osa-miR156d	XLOC_048354	3.5	12	31	UGACAGAAGAGAGUGAGCAC	UUCCUCUCUCUCUGCUGUCA	Cleavage		osa-miR444b.2	LOC_Os02g36924.1	0	564	584	UGCAGUUGUUGUCUCAAGCUU	AAGCUUGAGACAACAACUGCA	Cleavage	cDNA|OsMADS27 - MADS-box family gene with MIKCc type-box, expressed
osa-miR156e	XLOC_048354	3.5	12	31	UGACAGAAGAGAGUGAGCAC	UUCCUCUCUCUCUGCUGUCA	Cleavage		osa-miR444c.1	LOC_Os02g36924.1	0	558	578	UGUUGUCUCAAGCUUGCUGCC	GGCAGCAAGCUUGAGACAACA	Cleavage	cDNA|OsMADS27 - MADS-box family gene with MIKCc type-box, expressed
osa-miR156f-5p	XLOC_048354	3.5	12	31	UGACAGAAGAGAGUGAGCAC	UUCCUCUCUCUCUGCUGUCA	Cleavage		osa-miR444c.1	LOC_Os04g38780.1	0	91	111	UGUUGUCUCAAGCUUGCUGCC	GGCAGCAAGCUUGAGACAACA	Cleavage	cDNA|transcription factor, putative, expressed
osa-miR156g-5p	XLOC_048354	3.5	12	31	UGACAGAAGAGAGUGAGCAC	UUCCUCUCUCUCUGCUGUCA	Cleavage		osa-miR444c.2	LOC_Os04g38780.1	0	97	117	UGCAGUUGUUGUCUCAAGCUU	AAGCUUGAGACAACAACUGCA	Cleavage	cDNA|transcription factor, putative, expressed
osa-miR156h-5p	XLOC_048354	3.5	12	31	UGACAGAAGAGAGUGAGCAC	UUCCUCUCUCUCUGCUGUCA	Cleavage		osa-miR444c.2	LOC_Os02g36924.1	0	564	584	UGCAGUUGUUGUCUCAAGCUU	AAGCUUGAGACAACAACUGCA	Cleavage	cDNA|OsMADS27 - MADS-box family gene with MIKCc type-box, expressed
osa-miR156i	XLOC_048354	3.5	12	31	UGACAGAAGAGAGUGAGCAC	UUCCUCUCUCUCUGCUGUCA	Cleavage		osa-miR444d.2	LOC_Os02g49840.1	0	613	633	UGCAGUUGCUGCCUCAAGCUU	AAGCUUGAGGCAGCAACUGCA	Cleavage	cDNA|OsMADS57 - MADS-box family gene with MIKCc type-box, expressed
osa-miR156j-5p	XLOC_048354	3.5	12	31	UGACAGAAGAGAGUGAGCAC	UUCCUCUCUCUCUGCUGUCA	Cleavage		osa-miR444d.2	LOC_Os02g49840.4	0	613	633	UGCAGUUGCUGCCUCAAGCUU	AAGCUUGAGGCAGCAACUGCA	Cleavage	cDNA|OsMADS57 - MADS-box family gene with MIKCc type-box, expressed
osa-miR1846a-5p	XLOC_034986	3.5	211	231	AGUGAGGAGGCCGGGGCCGCU	CGCCGUUCCGGCCUCCUCUCU	Cleavage		osa-miR444d.2	LOC_Os02g49840.2	0	613	633	UGCAGUUGCUGCCUCAAGCUU	AAGCUUGAGGCAGCAACUGCA	Cleavage	cDNA|OsMADS57 - MADS-box family gene with MIKCc type-box, expressed
osa-miR1846b-5p	XLOC_034986	3.5	211	231	AGUGAGGAGGCCGGGGCCGCU	CGCCGUUCCGGCCUCCUCUCU	Cleavage		osa-miR444d.2	LOC_Os02g49840.3	0	613	633	UGCAGUUGCUGCCUCAAGCUU	AAGCUUGAGGCAGCAACUGCA	Cleavage	cDNA|OsMADS57 - MADS-box family gene with MIKCc type-box, expressed
osa-miR1846c-5p	XLOC_034986	3.5	211	231	AGUGAGGAGGCCGGGGCCGCU	CGCCGUUCCGGCCUCCUCUCU	Cleavage		osa-miR444d.2	LOC_Os08g33488.1	0	311	331	UGCAGUUGCUGCCUCAAGCUU	AAGCUUGAGGCAGCAACUGCA	Cleavage	cDNA|OsMADS23 - MADS-box family gene with MIKCc type-box, expressed
osa-miR1850.3	XLOC_024368	3.5	460	481	CUGUUUAGUUCACAUCAAUCUU	GUUAAUCGUGUGAACUAAACAA	Cleavage		osa-miR444d.3	LOC_Os02g49840.3	0	634	654	UUGUGGCUUUCUUGCAAGUUG	CAACUUGCAAGAAAGCCACAA	Cleavage	cDNA|OsMADS57 - MADS-box family gene with MIKCc type-box, expressed
osa-miR1852	XLOC_024683	3.5	1104	1124	AUAUGGAUUCAGAAUGCAGGU	UGUUAUAUUCUAAAUCCAUAU	Translation		osa-miR444d.3	LOC_Os02g49840.2	0	634	654	UUGUGGCUUUCUUGCAAGUUG	CAACUUGCAAGAAAGCCACAA	Cleavage	cDNA|OsMADS57 - MADS-box family gene with MIKCc type-box, expressed
osa-miR1858a	XLOC_038992	3.5	28	48	GAGAGGAGGACGGAGUGGGGC	GCUCCUCUCCGUCCUUUUCUG	Cleavage		osa-miR444d.3	LOC_Os02g49840.4	0	634	654	UUGUGGCUUUCUUGCAAGUUG	CAACUUGCAAGAAAGCCACAA	Cleavage	cDNA|OsMADS57 - MADS-box family gene with MIKCc type-box, expressed
osa-miR1858b	XLOC_038992	3.5	28	48	GAGAGGAGGACGGAGUGGGGC	GCUCCUCUCCGUCCUUUUCUG	Cleavage		osa-miR444d.3	LOC_Os02g49840.1	0	634	654	UUGUGGCUUUCUUGCAAGUUG	CAACUUGCAAGAAAGCCACAA	Cleavage	cDNA|OsMADS57 - MADS-box family gene with MIKCc type-box, expressed
osa-miR1862d	XLOC_043574	3.5	3195	3218	ACUAGGUUUGUUUAUUUUGGGACG	CAUUUUGAGAUAAACAAGUCUAGA	Cleavage		osa-miR444e	LOC_Os02g49840.1	0	613	633	UGCAGUUGCUGCCUCAAGCUU	AAGCUUGAGGCAGCAACUGCA	Cleavage	cDNA|OsMADS57 - MADS-box family gene with MIKCc type-box, expressed
osa-miR2118f	XLOC_048354	3.5	4653	4674	UUCCUGAUGCCUCCCAUUCCUA	UGUGAUUGAGAGGCAUCAGUAA	Cleavage		osa-miR444e	LOC_Os02g49840.4	0	613	633	UGCAGUUGCUGCCUCAAGCUU	AAGCUUGAGGCAGCAACUGCA	Cleavage	cDNA|OsMADS57 - MADS-box family gene with MIKCc type-box, expressed
osa-miR2118j	XLOC_048354	3.5	4653	4674	UUCCUGAUGCCUCCCAUUCCUA	UGUGAUUGAGAGGCAUCAGUAA	Cleavage		osa-miR444e	LOC_Os02g49840.2	0	613	633	UGCAGUUGCUGCCUCAAGCUU	AAGCUUGAGGCAGCAACUGCA	Cleavage	cDNA|OsMADS57 - MADS-box family gene with MIKCc type-box, expressed
osa-miR2118m	XLOC_048354	3.5	4653	4674	UUCCUGAUGCCUCCCAUUCCUA	UGUGAUUGAGAGGCAUCAGUAA	Cleavage		osa-miR444e	LOC_Os02g49840.3	0	613	633	UGCAGUUGCUGCCUCAAGCUU	AAGCUUGAGGCAGCAACUGCA	Cleavage	cDNA|OsMADS57 - MADS-box family gene with MIKCc type-box, expressed
osa-miR2922	XLOC_051299	3.5	644	663	AAUAAGUGAUUACCGAAAUU	GCUUUCGGUAAUUUCUUGUU	Cleavage		osa-miR444e	LOC_Os08g33488.1	0	311	331	UGCAGUUGCUGCCUCAAGCUU	AAGCUUGAGGCAGCAACUGCA	Cleavage	cDNA|OsMADS23 - MADS-box family gene with MIKCc type-box, expressed
osa-miR3981-3p	XLOC_005930	3.5	3948	3968	AGUAUUAGGAUACGUCUCAUC	CUUUAGAUGUAUCUAAAUACU	Cleavage		osa-miR5071	LOC_Os08g07340.1	0	1356	1376	UCAAGCAUCAUAUCGUGGACA	UGUCCACGAUAUGAUGCUUGA	Cleavage	cDNA|mla1, putative, expressed
osa-miR444a-3p.2	XLOC_014043	3.5	226	246	UGCAGUUGCUGCCUCAAGCUU	AUGUUUGCUGCAGCAACUGCG	Cleavage		osa-miR5338	LOC_Os05g26110.1	0	765	785	UGAAGCUUCAGUUGGUUGUAU	AUACAACCAACUGAAGCUUCA	Cleavage	cDNA|transposon protein, putative, Mutator sub-class, expressed
osa-miR444d.2	XLOC_014043	3.5	226	246	UGCAGUUGCUGCCUCAAGCUU	AUGUUUGCUGCAGCAACUGCG	Cleavage		osa-miR5338	LOC_Os12g38590.1	0	943	963	UGAAGCUUCAGUUGGUUGUAU	AUACAACCAACUGAAGCUUCA	Cleavage	cDNA|pumilio-family RNA binding repeat containing protein, expressed
osa-miR444e	XLOC_014043	3.5	226	246	UGCAGUUGCUGCCUCAAGCUU	AUGUUUGCUGCAGCAACUGCG	Cleavage		osa-miR5338	LOC_Os05g26040.1	0	1092	1112	UGAAGCUUCAGUUGGUUGUAU	AUACAACCAACUGAAGCUUCA	Cleavage	cDNA|pumilio-family RNA binding repeat containing protein, expressed
osa-miR5075	XLOC_014043	3.5	89	109	UUCUCCGUCGCCGCCGUCCGC	GGCGGCGGCGGCGGCGGCGAA	Cleavage		osa-miR5503	LOC_Os10g21342.1	0	150	171	UUCGGAUCUUUCUAGAGGCAUU	AAUGCCUCUAGAAAGAUCCGAA	Cleavage	cDNA|chloroplast 50S ribosomal protein L14, putative, expressed
osa-miR5150-3p	XLOC_047073	3.5	251	274	AGAAGCUGCAGCUGUCAGAAGCUC	AAGCUUUUAGUAGCUGCGGUUUCU	Cleavage		osa-miR5503	LOC_Os04g16828.1	0	150	171	UUCGGAUCUUUCUAGAGGCAUU	AAUGCCUCUAGAAAGAUCCGAA	Cleavage	cDNA|chloroplast 50S ribosomal protein L14, putative, expressed
osa-miR5492	XLOC_048525	3.5	2421	2441	AGAAGGAGAAUAGAUAUGGUU	AUUCAUAUCUAUUCACCUUUA	Cleavage		osa-miR5503	LOC_Os08g15276.1	0	150	171	UUCGGAUCUUUCUAGAGGCAUU	AAUGCCUCUAGAAAGAUCCGAA	Cleavage	cDNA|chloroplast 50S ribosomal protein L14, putative, expressed
osa-miR5521	XLOC_035128	3.5	6	26	AGUGGCUGCAUAUCUGAUGAG	CUCGCUAUAUAUGCGGCCACU	Cleavage		osa-miR5503	LOC_Os05g22722.1	0	150	171	UUCGGAUCUUUCUAGAGGCAUU	AAUGCCUCUAGAAAGAUCCGAA	Cleavage	cDNA|chloroplast 50S ribosomal protein L14, putative, expressed
osa-miR5817	XLOC_053468	3.5	713	736	AUCGAAUUUGAAAGAAAAAGGUAU	GUUGUAUUAUCUUUUGAAUUUGAU	Cleavage		osa-miR5503	LOC_Os01g57956.1	0	150	171	UUCGGAUCUUUCUAGAGGCAUU	AAUGCCUCUAGAAAGAUCCGAA	Cleavage	cDNA|chloroplast 50S ribosomal protein L14, putative, expressed
osa-miR6256	XLOC_000467	3.5	1860	1881	GUAGUACUCGGUUGUAGGUGUA	AAAACUUAAGACCGAGUACUUC	Cleavage		osa-miR5503	LOC_Os12g10610.1	0	330	351	UUCGGAUCUUUCUAGAGGCAUU	AAUGCCUCUAGAAAGAUCCGAA	Cleavage	cDNA|retrotransposon protein, putative, Ty3-gypsy subclass, expressed
osa-miR812a	XLOC_005292	3.5	343	364	GACGGACGGUUAAACGUUGGAC	AGCACAUGUUUGACCGUUCGUC	Cleavage		osa-miR5503	LOC_Os09g19954.1	0	1228	1249	UUCGGAUCUUUCUAGAGGCAUU	AAUGCCUCUAGAAAGAUCCGAA	Cleavage	cDNA|ribosomal protein, putative, expressed
osa-miR812b	XLOC_005292	3.5	343	364	GACGGACGGUUAAACGUUGGAC	AGCACAUGUUUGACCGUUCGUC	Cleavage		osa-miR5523	LOC_Os10g21324.1	0	116	137	UGAGGAGGAACAUAUUUACUAG	CUAGUAAAUAUGUUCCUCCUCA	Cleavage	cDNA|cytochrome b6, putative, expressed
osa-miR812c	XLOC_005292	3.5	343	364	GACGGACGGUUAAACGUUGGAC	AGCACAUGUUUGACCGUUCGUC	Cleavage		osa-miR5523	LOC_Os04g16846.1	0	116	137	UGAGGAGGAACAUAUUUACUAG	CUAGUAAAUAUGUUCCUCCUCA	Cleavage	cDNA|cytochrome b6, putative, expressed
osa-miR812d	XLOC_005292	3.5	343	364	GACGGACGGUUAAACGUUGGAC	AGCACAUGUUUGACCGUUCGUC	Cleavage		osa-miR5523	LOC_Os01g57942.1	0	116	137	UGAGGAGGAACAUAUUUACUAG	CUAGUAAAUAUGUUCCUCCUCA	Cleavage	cDNA|cytochrome b6, putative, expressed
osa-miR812e	XLOC_005292	3.5	343	364	GACGGACGGUUAAACGUUGGAC	AGCACAUGUUUGACCGUUCGUC	Cleavage		osa-miR5539a	LOC_Os09g08910.1	0	1663	1684	AAGAAAACGGAUGCGCGUGCUA	UAGCACGCGCAUCCGUUUUCUU	Cleavage	cDNA|ATP synthase, putative, expressed
osa-miR1429-3p	XLOC_018843	4	536	555	GUUGCACGGGUUUGUAUGUUG	UUACAUACAAACU-GUGCAAU	Cleavage		osa-miR5539b	LOC_Os09g08910.1	0	1663	1684	AAGAAAACGGAUGCGCGUGCUA	UAGCACGCGCAUCCGUUUUCUU	Cleavage	cDNA|ATP synthase, putative, expressed
osa-miR1435	XLOC_000467	4	1138	1156	UUUCUUAAGUCAAACUUUUU	AAGAAGUUUGA-UUAGGAAA	Cleavage		osa-miR5829	LOC_Os06g34670.1	0	397	420	AUCAGGACCAGUAGGCGAUGGUAA	UUACCAUCGCCUACUGGUCCUGAU	Cleavage	cDNA|expressed protein
osa-miR156l-5p	XLOC_014679	4	167	187	CGACAGAAGAGAGUGAGCAUA	CAUGAUUUCUCUUUUUUGUUG	Cleavage		osa-miR5833	LOC_Os09g10430.1	0	1401	1421	UCCUCCUCGGGCUCAUCGGGC	GCCCGAUGAGCCCGAGGAGGA	Cleavage	cDNA|retrotransposon protein, putative, unclassified, expressed
osa-miR160e-3p	XLOC_037804	4	628	648	GCGUGCGAGGUGCCAAGCAUG	AAUGCUAAGCACCUCGUAUGG	Cleavage		osa-miR5833	LOC_Os09g10420.1	0	1047	1067	UCCUCCUCGGGCUCAUCGGGC	GCCCGAUGAGCCCGAGGAGGA	Cleavage	cDNA|retrotransposon protein, putative, unclassified, expressed
osa-miR169r-5p	XLOC_014043	4	723	743	UAGCCAAGGAUGAUUUGCCUG	AAGGCAAAUUACUAUUGGCUA	Translation		osa-miR5833	LOC_Os05g16450.1	0	333	353	UCCUCCUCGGGCUCAUCGGGC	GCCCGAUGAGCCCGAGGAGGA	Cleavage	cDNA|hypothetical protein
osa-miR1847.2	XLOC_054216	4	989	1012	UGGCCCACAUGUUAGUGCCACAAC	CACAAAGCACAAGCGUGUGGGUUA	Cleavage		osa-miR5833	LOC_Os05g16530.1	0	324	344	UCCUCCUCGGGCUCAUCGGGC	GCCCGAUGAGCCCGAGGAGGA	Cleavage	cDNA|retrotransposon protein, putative, unclassified, expressed
osa-miR1848	XLOC_053468	4	124	144	CCUCGCCGGCGCGCGCGUGCA	GGGGAGGGCGCGCCGGCGAGG	Cleavage		osa-miR5833	LOC_Os09g07230.1	0	3552	3572	UCCUCCUCGGGCUCAUCGGGC	ACCCGAUGAGCCCGAGGAGGA	Cleavage	cDNA|retrotransposon protein, putative, unclassified, expressed
osa-miR1853-5p	XLOC_048525	4	1821	1844	AGCAUUCAAACAUUCCCAAUUACC	UUAAAAUGGGUAUUUUUGAAUGUU	Translation		osa-miR812a	LOC_Os03g48380.1	0	1600	1621	GACGGACGGUUAAACGUUGGAC	GUCCAACGUUUAACCGUCCGUC	Cleavage	cDNA|expressed protein
osa-miR1863a	XLOC_000467	4	1088	1111	AGCUCUGAUACCAUGUUAGAUUAG	UAAAACUAAUUUGGUGUUAGAGAU	Cleavage		osa-miR812b	LOC_Os03g48380.1	0	1600	1621	GACGGACGGUUAAACGUUGGAC	GUCCAACGUUUAACCGUCCGUC	Cleavage	cDNA|expressed protein
osa-miR1866-3p	XLOC_006629	4	77	98	UGAAAUUCCUGUAAAAUUCUUG	GAUGAAAUUUACAAAAAUUUCA	Cleavage		osa-miR812c	LOC_Os03g48380.1	0	1600	1621	GACGGACGGUUAAACGUUGGAC	GUCCAACGUUUAACCGUCCGUC	Cleavage	cDNA|expressed protein
osa-miR1866-5p	XLOC_050893	4	538	561	GAGGGAUUUUGCGGGAAUUUCACG	ACCAAAAUUCUUCUAAAAUCUUUC	Cleavage		osa-miR812d	LOC_Os03g48380.1	0	1600	1621	GACGGACGGUUAAACGUUGGAC	GUCCAACGUUUAACCGUCCGUC	Cleavage	cDNA|expressed protein
osa-miR1870-3p	XLOC_018755	4	312	335	UUUAGGGCUAAUUCAGCAUGAACA	CUCUGAUGGUGAGUUAGCUCCAAG	Cleavage		osa-miR812e	LOC_Os03g48380.1	0	1600	1621	GACGGACGGUUAAACGUUGGAC	GUCCAACGUUUAACCGUCCGUC	Cleavage	cDNA|expressed protein
osa-miR1874-3p	XLOC_049851	4	1052	1075	UAUGGAUGGAGGUGUAACCCGAUG	GGAAGUGUUACAUUUCCAUUCGUU	Cleavage		osa-miR812p	LOC_Os02g07960.4	0	3482	3505	GACGGACGAUUAAAGUUGGGCAUG	CGUGCCCAACUUUAAUCGUCCGUC	Cleavage	cDNA|STRUBBELIG-RECEPTOR FAMILY 3 precursor, putative, expressed
osa-miR1877	XLOC_014043	4	530	553	AGAUGACAUGUGAAUGAUGAGGGG	UGAAUAAUCAUUCACAUGUUAUAC	Cleavage		osa-miR812s	LOC_Os11g31690.1	0	1647	1670	AAGACGGACAAUCAAACGUUGGAC	GUCCAACGUUUGAUUGUCCGUCUU	Cleavage	cDNA|expressed protein
osa-miR1879	XLOC_048525	4	3818	3841	GUGUUUGGUUUAGGGAUGAGGUGG	AAUCGUCGUCUCAAAAUUGAACAC	Cleavage		osa-miR812s	LOC_Os11g31690.2	0	1648	1671	AAGACGGACAAUCAAACGUUGGAC	GUCCAACGUUUGAUUGUCCGUCUU	Cleavage	cDNA|expressed protein
osa-miR1882a	XLOC_048354	4	3802	3825	AGAUUGCUUUCAAGGUCAUUUCUU	GAUUUGUGGAUUUGGAGGCAAUUU	Cleavage		osa-miR815a	LOC_Os04g34360.1	0	1877	1897	AAGGGGAUUGAGGAGAUUGGG	CCCAAUCUCCUCAAUCCCCUU	Cleavage	cDNA|serine/threonine-protein kinase receptor precursor, putative, expressed
osa-miR1882b	XLOC_048354	4	3802	3825	AGAUUGCUUUCAAGGUCAUUUCUU	GAUUUGUGGAUUUGGAGGCAAUUU	Cleavage		osa-miR815b	LOC_Os04g34360.1	0	1877	1897	AAGGGGAUUGAGGAGAUUGGG	CCCAAUCUCCUCAAUCCCCUU	Cleavage	cDNA|serine/threonine-protein kinase receptor precursor, putative, expressed
osa-miR1882c	XLOC_048354	4	3802	3825	AGAUUGCUUUCAAGGUCAUUUCUU	GAUUUGUGGAUUUGGAGGCAAUUU	Cleavage		osa-miR815c	LOC_Os04g34360.1	0	1877	1897	AAGGGGAUUGAGGAGAUUGGG	CCCAAUCUCCUCAAUCCCCUU	Cleavage	cDNA|serine/threonine-protein kinase receptor precursor, putative, expressed
osa-miR1882d	XLOC_048354	4	3802	3825	AGAUUGCUUUCAAGGUCAUUUCUU	GAUUUGUGGAUUUGGAGGCAAUUU	Cleavage		osa-miR818a	LOC_Os07g40450.2	0	91	112	AAUCCCUUAUAUUAUGGGACGG	CCGUCCCAUAAUAUAAGGGAUU	Cleavage	cDNA|expressed protein
osa-miR1882e-5p	XLOC_048354	4	3802	3825	AGAUUGCUUUCAAGGUCAUUUCUU	GAUUUGUGGAUUUGGAGGCAAUUU	Cleavage		osa-miR818a	LOC_Os07g40450.1	0	91	112	AAUCCCUUAUAUUAUGGGACGG	CCGUCCCAUAAUAUAAGGGAUU	Cleavage	cDNA|expressed protein
osa-miR1882f	XLOC_048354	4	3802	3825	AGAUUGCUUUCAAGGUCAUUUCUU	GAUUUGUGGAUUUGGAGGCAAUUU	Cleavage		osa-miR818a	LOC_Os09g36320.1	0	1589	1610	AAUCCCUUAUAUUAUGGGACGG	CCGUCCCAUAAUAUAAGGGAUU	Cleavage	cDNA|tyrosine protein kinase domain containing protein, putative, expressed
osa-miR1882g	XLOC_048354	4	3802	3825	AGAUUGCUUUCAAGGUCAUUUCUU	GAUUUGUGGAUUUGGAGGCAAUUU	Cleavage		osa-miR818a	LOC_Os03g15350.1	0	2448	2469	AAUCCCUUAUAUUAUGGGACGG	CCGUCCCAUAAUAUAAGGGAUU	Cleavage	cDNA|Sel1 repeat domain containing protein, putative, expressed
osa-miR1882h	XLOC_048354	4	3802	3825	AGAUUGCUUUCAAGGUCAUUUCUU	GAUUUGUGGAUUUGGAGGCAAUUU	Cleavage		osa-miR818a	LOC_Os01g63880.1	0	2158	2179	AAUCCCUUAUAUUAUGGGACGG	CCGUCCCAUAAUAUAAGGGAUU	Cleavage	cDNA|expressed protein
osa-miR2091-3p	XLOC_018784	4	11	31	CAUACAUUGCCUCCUAGGCUUG	UUAGUC-GUGAGGCAAUGUAUG	Cleavage		osa-miR818a	LOC_Os06g11500.1	0	2485	2506	AAUCCCUUAUAUUAUGGGACGG	CCGUCCCAUAAUAUAAGGGAUU	Cleavage	cDNA|MCM9 - Putative minichromosome maintenance MCM family subunit 9, expressed
osa-miR2868	XLOC_048354	4	3222	3241	UUGGUUUUGUGUAGUAGAAA	AUUCAACUAAACAAAACCCA	Translation		osa-miR818a	LOC_Os09g10710.2	0	2003	2024	AAUCCCUUAUAUUAUGGGACGG	CCAUCCCAUAAUAUAAGGGAUU	Cleavage	cDNA|R-interacting factor 1, putative, expressed
osa-miR2870	XLOC_022714	4	1088	1108	UAAUCAGUUUGGGGAGACAAA	CGUGGCUUUUCAAACUGAUAA	Cleavage		osa-miR818a	LOC_Os09g10710.1	0	2017	2038	AAUCCCUUAUAUUAUGGGACGG	CCAUCCCAUAAUAUAAGGGAUU	Cleavage	cDNA|R-interacting factor 1, putative, expressed
osa-miR2878-5p	XLOC_024368	4	242	265	UACAUGUAUAAAAUUCUGAGGAUG	ACGUACCGGAUUUUUAAACAUGUA	Cleavage		osa-miR818a	LOC_Os09g10710.3	0	2438	2459	AAUCCCUUAUAUUAUGGGACGG	CCAUCCCAUAAUAUAAGGGAUU	Cleavage	cDNA|R-interacting factor 1, putative, expressed
osa-miR2923	XLOC_038992	4	1006	1027	AGACAAAAAUAUAAAUAACAAA	GGUGUUAUUUGUUUUUUUGCUU	Translation		osa-miR818b	LOC_Os07g40450.2	0	91	112	AAUCCCUUAUAUUAUGGGACGG	CCGUCCCAUAAUAUAAGGGAUU	Cleavage	cDNA|expressed protein
osa-miR2927	XLOC_002582	4	564	586	UGUCGUCGUCGAUGGAGCCCAUG	CCGCGCCUACAUCGGCGGCGGCG	Cleavage		osa-miR818b	LOC_Os07g40450.1	0	91	112	AAUCCCUUAUAUUAUGGGACGG	CCGUCCCAUAAUAUAAGGGAUU	Cleavage	cDNA|expressed protein
osa-miR2929	XLOC_001451	4	871	891	CUCAAGGGUGUUUGUGAAAUA	UAUUUCCAAAAUACCCUUUAG	Cleavage		osa-miR818b	LOC_Os09g36320.1	0	1589	1610	AAUCCCUUAUAUUAUGGGACGG	CCGUCCCAUAAUAUAAGGGAUU	Cleavage	cDNA|tyrosine protein kinase domain containing protein, putative, expressed
osa-miR444d.3	XLOC_030132	4	834	854	UUGUGGCUUUCUUGCAAGUUG	AAAAUAGCAAGAAAGCGAUAA	Cleavage		osa-miR818b	LOC_Os03g15350.1	0	2448	2469	AAUCCCUUAUAUUAUGGGACGG	CCGUCCCAUAAUAUAAGGGAUU	Cleavage	cDNA|Sel1 repeat domain containing protein, putative, expressed
osa-miR444f	XLOC_014043	4	226	246	UGCAGUUGUUGCCUCAAGCUU	AUGUUUGCUGCAGCAACUGCG	Cleavage		osa-miR818b	LOC_Os01g63880.1	0	2158	2179	AAUCCCUUAUAUUAUGGGACGG	CCGUCCCAUAAUAUAAGGGAUU	Cleavage	cDNA|expressed protein
osa-miR5071	XLOC_035674	4	318	338	UCAAGCAUCAUAUCGUGGACA	UUUUAAUGAUAUGAUGAUUGG	Cleavage		osa-miR818b	LOC_Os06g11500.1	0	2485	2506	AAUCCCUUAUAUUAUGGGACGG	CCGUCCCAUAAUAUAAGGGAUU	Cleavage	cDNA|MCM9 - Putative minichromosome maintenance MCM family subunit 9, expressed
osa-miR5143a	XLOC_005930	4	2861	2884	UGUGGUAUGUUGGCAAUGUAGGAA	GCCCCUCGUUGCUGACAUCCCACA	Cleavage		osa-miR818b	LOC_Os09g10710.2	0	2003	2024	AAUCCCUUAUAUUAUGGGACGG	CCAUCCCAUAAUAUAAGGGAUU	Cleavage	cDNA|R-interacting factor 1, putative, expressed
osa-miR5143b	XLOC_005930	4	2861	2884	UGUGGUAUGUUGGCAAUGUAGGAA	GCCCCUCGUUGCUGACAUCCCACA	Cleavage		osa-miR818b	LOC_Os09g10710.1	0	2017	2038	AAUCCCUUAUAUUAUGGGACGG	CCAUCCCAUAAUAUAAGGGAUU	Cleavage	cDNA|R-interacting factor 1, putative, expressed
osa-miR5146	XLOC_037957	4	1109	1132	UUUAACUAAUGAACCGGCACCUAU	UAAAAUUUUAGUUCAUUAGUUGGA	Cleavage		osa-miR818b	LOC_Os09g10710.3	0	2438	2459	AAUCCCUUAUAUUAUGGGACGG	CCAUCCCAUAAUAUAAGGGAUU	Cleavage	cDNA|R-interacting factor 1, putative, expressed
osa-miR5157a-3p	XLOC_047073	4	251	274	AGAAGUUGUGGCUAUCAAAAAGUU	AAGCUUUUAGUAGCUGCGGUUUCU	Cleavage		osa-miR818c	LOC_Os07g40450.2	0	91	112	AAUCCCUUAUAUUAUGGGACGG	CCGUCCCAUAAUAUAAGGGAUU	Cleavage	cDNA|expressed protein
osa-miR5157b-3p	XLOC_047073	4	251	274	AGAAGUUGUGGCUAUCAAAAAGUU	AAGCUUUUAGUAGCUGCGGUUUCU	Cleavage		osa-miR818c	LOC_Os07g40450.1	0	91	112	AAUCCCUUAUAUUAUGGGACGG	CCGUCCCAUAAUAUAAGGGAUU	Cleavage	cDNA|expressed protein
osa-miR5337a	XLOC_014679	4	116	136	AAAUUACUUGUCGUUCUAGCU	CACUGCAACUGCAAGUGAUUU	Cleavage		osa-miR818c	LOC_Os09g36320.1	0	1589	1610	AAUCCCUUAUAUUAUGGGACGG	CCGUCCCAUAAUAUAAGGGAUU	Cleavage	cDNA|tyrosine protein kinase domain containing protein, putative, expressed
osa-miR5490	XLOC_030132	4	20	40	UUGGAUUUUUAUUUAGGACGG	UAGUCCUGAAUGAAAAUGUGG	Cleavage		osa-miR818c	LOC_Os03g15350.1	0	2448	2469	AAUCCCUUAUAUUAUGGGACGG	CCGUCCCAUAAUAUAAGGGAUU	Cleavage	cDNA|Sel1 repeat domain containing protein, putative, expressed
osa-miR5506	XLOC_054212	4	346	366	UGGAUCGCUUCGUCUGAUGGU	CACAUAGGAUGAAGAGAUUCA	Cleavage		osa-miR818c	LOC_Os01g63880.1	0	2158	2179	AAUCCCUUAUAUUAUGGGACGG	CCGUCCCAUAAUAUAAGGGAUU	Cleavage	cDNA|expressed protein
osa-miR5511	XLOC_033278	4	203	223	CAUAUCCCAGCUGUUUCGGCC	CACUCAGACAGUGGGGAUAUG	Cleavage		osa-miR818c	LOC_Os06g11500.1	0	2485	2506	AAUCCCUUAUAUUAUGGGACGG	CCGUCCCAUAAUAUAAGGGAUU	Cleavage	cDNA|MCM9 - Putative minichromosome maintenance MCM family subunit 9, expressed
osa-miR5514	XLOC_050893	4	2147	2167	UCCCAGAGCUUUGGCCGUCGC	GUAUCGGCUAAAGCUCUGGUA	Cleavage		osa-miR818c	LOC_Os09g10710.2	0	2003	2024	AAUCCCUUAUAUUAUGGGACGG	CCAUCCCAUAAUAUAAGGGAUU	Cleavage	cDNA|R-interacting factor 1, putative, expressed
osa-miR5523	XLOC_038992	4	953	974	UGAGGAGGAACAUAUUUACUAG	AAAGAGAAUAGGUUUCUCCUUA	Cleavage		osa-miR818c	LOC_Os09g10710.1	0	2017	2038	AAUCCCUUAUAUUAUGGGACGG	CCAUCCCAUAAUAUAAGGGAUU	Cleavage	cDNA|R-interacting factor 1, putative, expressed
osa-miR5524	XLOC_034986	4	1681	1701	UGGAAAAUGUGUUCAUGACGG	CUGACAUGGACAUAUUUUGUA	Cleavage		osa-miR818c	LOC_Os09g10710.3	0	2438	2459	AAUCCCUUAUAUUAUGGGACGG	CCAUCCCAUAAUAUAAGGGAUU	Cleavage	cDNA|R-interacting factor 1, putative, expressed
osa-miR5539a	XLOC_040333	4	617	638	AAGAAAACGGAUGCGCGUGCUA	GCGCACGCGCGUGCGUCUUUUU	Translation		osa-miR818d	LOC_Os07g40450.2	0	91	112	AAUCCCUUAUAUUAUGGGACGG	CCGUCCCAUAAUAUAAGGGAUU	Cleavage	cDNA|expressed protein
osa-miR5539b	XLOC_040333	4	617	638	AAGAAAACGGAUGCGCGUGCUA	GCGCACGCGCGUGCGUCUUUUU	Translation		osa-miR818d	LOC_Os07g40450.1	0	91	112	AAUCCCUUAUAUUAUGGGACGG	CCGUCCCAUAAUAUAAGGGAUU	Cleavage	cDNA|expressed protein
osa-miR5543	XLOC_024018	4	642	662	UAUGAAUGGUAUAUUUUCUUG	AUUGGAAGUAUACUAUUCAGA	Cleavage		osa-miR818d	LOC_Os09g36320.1	0	1589	1610	AAUCCCUUAUAUUAUGGGACGG	CCGUCCCAUAAUAUAAGGGAUU	Cleavage	cDNA|tyrosine protein kinase domain containing protein, putative, expressed
osa-miR5799	XLOC_005292	4	343	366	AAGACGAAUAAUCAAACGUUGGAC	AGCACAUGUUUGACCGUUCGUCUU	Translation		osa-miR818d	LOC_Os03g15350.1	0	2448	2469	AAUCCCUUAUAUUAUGGGACGG	CCGUCCCAUAAUAUAAGGGAUU	Cleavage	cDNA|Sel1 repeat domain containing protein, putative, expressed
osa-miR5825	XLOC_034986	4	462	485	AAAACAUCUGAUAACCUGAAACGG	CGAUUUCAAGUUAUAAGACGUUUU	Translation		osa-miR818d	LOC_Os01g63880.1	0	2158	2179	AAUCCCUUAUAUUAUGGGACGG	CCGUCCCAUAAUAUAAGGGAUU	Cleavage	cDNA|expressed protein
osa-miR5831	XLOC_001451	4	3408	3431	UAGUCAAACUUAGAAUAGUUGGAC	UUAUAAGUCGUUUGAGUUUGACUA	Cleavage		osa-miR818d	LOC_Os06g11500.1	0	2485	2506	AAUCCCUUAUAUUAUGGGACGG	CCGUCCCAUAAUAUAAGGGAUU	Cleavage	cDNA|MCM9 - Putative minichromosome maintenance MCM family subunit 9, expressed
osa-miR6252	XLOC_033278	4	144	166	AUUCGUUGUAUUAAGAGAGGGUU	AUUUUUCUCUUGGUAGAAUGGAU	Cleavage		osa-miR818d	LOC_Os09g10710.2	0	2003	2024	AAUCCCUUAUAUUAUGGGACGG	CCAUCCCAUAAUAUAAGGGAUU	Cleavage	cDNA|R-interacting factor 1, putative, expressed
osa-miR6253	XLOC_022714	4	1553	1574	GAGGAAAGUGGGCAGUUGGGUU	UUCUCAUACGCCCACUUUUCUC	Cleavage		osa-miR818d	LOC_Os09g10710.1	0	2017	2038	AAUCCCUUAUAUUAUGGGACGG	CCAUCCCAUAAUAUAAGGGAUU	Cleavage	cDNA|R-interacting factor 1, putative, expressed
osa-miR6254	XLOC_038992	4	238	258	UGCUCCGGAUAUUAUGGCAUG	GCUGUCAGAAUAUUUGCAGCA	Cleavage		osa-miR818d	LOC_Os09g10710.3	0	2438	2459	AAUCCCUUAUAUUAUGGGACGG	CCAUCCCAUAAUAUAAGGGAUU	Cleavage	cDNA|R-interacting factor 1, putative, expressed
osa-miR812k	XLOC_045209	4	7	30	ACGAACGGUUAAAGUUGGACGCGG	CCGUGUCCAACUUUGACUAUCCGU	Cleavage		osa-miR818e	LOC_Os07g40450.2	0	91	112	AAUCCCUUAUAUUAUGGGACGG	CCGUCCCAUAAUAUAAGGGAUU	Cleavage	cDNA|expressed protein
osa-miR812l	XLOC_045209	4	7	30	ACGAACGGUUAAAGUUGGACGCGG	CCGUGUCCAACUUUGACUAUCCGU	Cleavage		osa-miR818e	LOC_Os07g40450.1	0	91	112	AAUCCCUUAUAUUAUGGGACGG	CCGUCCCAUAAUAUAAGGGAUU	Cleavage	cDNA|expressed protein
osa-miR812m	XLOC_045209	4	7	30	ACGAACGGUUAAAGUUGGACGCGG	CCGUGUCCAACUUUGACUAUCCGU	Cleavage		osa-miR818e	LOC_Os09g36320.1	0	1589	1610	AAUCCCUUAUAUUAUGGGACGG	CCGUCCCAUAAUAUAAGGGAUU	Cleavage	cDNA|tyrosine protein kinase domain containing protein, putative, expressed
osa-miR812p	XLOC_045209	4	8	31	GACGGACGAUUAAAGUUGGGCAUG	CGUGUCCAACUUUGACUAUCCGUC	Cleavage		osa-miR818e	LOC_Os03g15350.1	0	2448	2469	AAUCCCUUAUAUUAUGGGACGG	CCGUCCCAUAAUAUAAGGGAUU	Cleavage	cDNA|Sel1 repeat domain containing protein, putative, expressed
osa-miR812s	XLOC_005292	4	343	366	AAGACGGACAAUCAAACGUUGGAC	AGCACAUGUUUGACCGUUCGUCUU	Translation		osa-miR818e	LOC_Os01g63880.1	0	2158	2179	AAUCCCUUAUAUUAUGGGACGG	CCGUCCCAUAAUAUAAGGGAUU	Cleavage	cDNA|expressed protein
osa-miR814a	XLOC_049851	4	1037	1058	CACUUCAUAGUACAACGAAUCU	AAAUUUAUAGUACUAGGAAGUG	Cleavage		osa-miR818e	LOC_Os06g11500.1	0	2485	2506	AAUCCCUUAUAUUAUGGGACGG	CCGUCCCAUAAUAUAAGGGAUU	Cleavage	cDNA|MCM9 - Putative minichromosome maintenance MCM family subunit 9, expressed
osa-miR814b	XLOC_049851	4	1037	1058	CACUUCAUAGUACAACGAAUCU	AAAUUUAUAGUACUAGGAAGUG	Cleavage		osa-miR818e	LOC_Os09g10710.2	0	2003	2024	AAUCCCUUAUAUUAUGGGACGG	CCAUCCCAUAAUAUAAGGGAUU	Cleavage	cDNA|R-interacting factor 1, putative, expressed
osa-miR814c	XLOC_049851	4	1037	1058	CACUUCAUAGUACAACGAAUCU	AAAUUUAUAGUACUAGGAAGUG	Cleavage		osa-miR818e	LOC_Os09g10710.1	0	2017	2038	AAUCCCUUAUAUUAUGGGACGG	CCAUCCCAUAAUAUAAGGGAUU	Cleavage	cDNA|R-interacting factor 1, putative, expressed
osa-miR818f	XLOC_048525	4	268	288	GGGAGCAUGUAGGAUGGCCAU	CUGGCCAUUCUAUUUACUCCC	Cleavage		osa-miR818e	LOC_Os09g10710.3	0	2438	2459	AAUCCCUUAUAUUAUGGGACGG	CCAUCCCAUAAUAUAAGGGAUU	Cleavage	cDNA|R-interacting factor 1, putative, expressed
osa-miR1319b	XLOC_034986	4.5	1635	1658	CCUUUAAUAUAUUAUAGGUGUCGG	CAAAGACUUAUGGUAUCUUAGAGU	Cleavage		osa-miR1439	LOC_Os07g28260.1	0.5	1799	1819	UUUUGGAACGGAGUGAGUAUU	UAUACUCACUCUGUUCCAAAA	Cleavage	cDNA|expressed protein
osa-miR1427	XLOC_006592	4.5	274	295	UGCGGAACCGUGCG-GUGGCGC	UUCCCACACGCACGGUGCCGCA	Cleavage		osa-miR1439	LOC_Os07g28260.6	0.5	1935	1955	UUUUGGAACGGAGUGAGUAUU	UAUACUCACUCUGUUCCAAAA	Cleavage	cDNA|expressed protein
osa-miR1440b	XLOC_050893	4.5	2743	2763	UUUAGGAGAGUGGUAUUUGAG	CUUAAAAAUCACUUUCUAAAA	Cleavage		osa-miR1439	LOC_Os07g28260.5	0.5	2053	2073	UUUUGGAACGGAGUGAGUAUU	UAUACUCACUCUGUUCCAAAA	Cleavage	cDNA|expressed protein
osa-miR156j-3p	XLOC_022714	4.5	540	561	GCUCGCUCCUCUUUCUGUCAGC	GAAGGAAGAAAGAAGAGCAAGC	Cleavage		osa-miR1439	LOC_Os07g28260.4	0.5	2150	2170	UUUUGGAACGGAGUGAGUAUU	UAUACUCACUCUGUUCCAAAA	Cleavage	cDNA|expressed protein
osa-miR159a.1	XLOC_034986	4.5	949	969	UUUGGAUUGAAGGGAGCUCUG	CAUAUCUUCUUUCAUUCCAAA	Cleavage		osa-miR169d	LOC_Os07g06470.2	0.5	1214	1234	UAGCCAAGGAUGAAUUGCCGG	GUGGCAAUUCAUCCUUGGCUG	Cleavage	cDNA|nuclear transcription factor Y subunit, putative, expressed
osa-miR159b	XLOC_034986	4.5	949	969	UUUGGAUUGAAGGGAGCUCUG	CAUAUCUUCUUUCAUUCCAAA	Cleavage		osa-miR169d	LOC_Os07g06470.1	0.5	1425	1445	UAGCCAAGGAUGAAUUGCCGG	GUGGCAAUUCAUCCUUGGCUG	Cleavage	cDNA|nuclear transcription factor Y subunit, putative, expressed
osa-miR166i-5p	XLOC_034986	4.5	1814	1834	AAUGCAGUUUGAUCCAAGAUC	GCUUUCGGGUUGAGCUGCAUC	Cleavage		osa-miR172a	LOC_Os05g03040.2	0.5	1552	1572	AGAAUCUUGAUGAUGCUGCAU	CUGCAGCAUCAUCAGGAUUCU	Cleavage	cDNA|AP2 domain containing protein, expressed
osa-miR167a-3p	XLOC_040345	4.5	350	371	AUCAUGCAUGACAGCCUCAUUU	AUGUGGUGUUGUUGUCCAUGAU	Cleavage		osa-miR172a	LOC_Os03g60430.1	0.5	1755	1775	AGAAUCUUGAUGAUGCUGCAU	CUGCAGCAUCAUCAGGAUUCU	Cleavage	cDNA|AP2 domain containing protein, expressed
osa-miR168a-5p	XLOC_035128	4.5	318	338	UCGCUUGGUGCAGAUCGGGAC	CUCCCGCUCUGCGUCAAGAGC	Cleavage		osa-miR172a	LOC_Os03g60430.2	0.5	1767	1787	AGAAUCUUGAUGAUGCUGCAU	CUGCAGCAUCAUCAGGAUUCU	Cleavage	cDNA|AP2 domain containing protein, expressed
osa-miR169n	XLOC_014043	4.5	723	743	UAGCCAAGAAUGACUUGCCUA	AAGGCAAAUUACUAUUGGCUA	Translation		osa-miR172a	LOC_Os07g13170.2	0.5	1463	1483	AGAAUCUUGAUGAUGCUGCAU	CUGCAGCAUCAUCAGGAUUCU	Cleavage	cDNA|AP2 domain containing protein, expressed
osa-miR169o	XLOC_014043	4.5	723	743	UAGCCAAGAAUGACUUGCCUA	AAGGCAAAUUACUAUUGGCUA	Translation		osa-miR172a	LOC_Os07g13170.1	0.5	1404	1424	AGAAUCUUGAUGAUGCUGCAU	CUGCAGCAUCAUCAGGAUUCU	Cleavage	cDNA|AP2 domain containing protein, expressed
osa-miR1847.1	XLOC_018841	4.5	341	361	UGCAGUUUGCAGUUGUGGCAC	GCGCUCCAGCUGCGGGUUGUA	Cleavage		osa-miR172a	LOC_Os05g03040.1	0.5	1976	1996	AGAAUCUUGAUGAUGCUGCAU	CUGCAGCAUCAUCAGGAUUCU	Cleavage	cDNA|AP2 domain containing protein, expressed
osa-miR1854-5p	XLOC_050893	4.5	950	972	UGGUGAAAUUUGUA--GAUUGGA	CUCAAUCGAUAUAAGUUUUGCCA	Cleavage		osa-miR172a	LOC_Os05g03040.3	0.5	2089	2109	AGAAUCUUGAUGAUGCUGCAU	CUGCAGCAUCAUCAGGAUUCU	Cleavage	cDNA|AP2 domain containing protein, expressed
osa-miR1861b	XLOC_034986	4.5	1804	1825	CGAUCUUGAGGCAGGAACUGAG	ACGAGUUCUUGCUUUCGGGUUG	Cleavage		osa-miR172b	LOC_Os06g43220.1	0.5	1480	1500	GGAAUCUUGAUGAUGCUGCAU	CUGCAGCAUCAUCAGGAUUCC	Cleavage	cDNA|AP2 domain containing protein, expressed
osa-miR1861f	XLOC_034986	4.5	1804	1825	CGAUCUUGAGGCAGGAACUGAG	ACGAGUUCUUGCUUUCGGGUUG	Cleavage		osa-miR172d-3p	LOC_Os05g03040.2	0.5	1552	1572	AGAAUCUUGAUGAUGCUGCAU	CUGCAGCAUCAUCAGGAUUCU	Cleavage	cDNA|AP2 domain containing protein, expressed
osa-miR1861i	XLOC_034986	4.5	1804	1825	CGAUCUUGAGGCAGGAACUGAG	ACGAGUUCUUGCUUUCGGGUUG	Cleavage		osa-miR172d-3p	LOC_Os03g60430.1	0.5	1755	1775	AGAAUCUUGAUGAUGCUGCAU	CUGCAGCAUCAUCAGGAUUCU	Cleavage	cDNA|AP2 domain containing protein, expressed
osa-miR1861l	XLOC_034986	4.5	1804	1825	CGAUCUUGAGGCAGGAACUGAG	ACGAGUUCUUGCUUUCGGGUUG	Cleavage		osa-miR172d-3p	LOC_Os03g60430.2	0.5	1767	1787	AGAAUCUUGAUGAUGCUGCAU	CUGCAGCAUCAUCAGGAUUCU	Cleavage	cDNA|AP2 domain containing protein, expressed
osa-miR1862a	XLOC_006652	4.5	324	347	ACGAGGUUGGUUUAUUUUGGGACG	AGGCCCAAACCAAGUCGACCUCGA	Cleavage		osa-miR172d-3p	LOC_Os07g13170.2	0.5	1463	1483	AGAAUCUUGAUGAUGCUGCAU	CUGCAGCAUCAUCAGGAUUCU	Cleavage	cDNA|AP2 domain containing protein, expressed
osa-miR1862b	XLOC_006652	4.5	324	347	ACGAGGUUGGUUUAUUUUGGGACG	AGGCCCAAACCAAGUCGACCUCGA	Cleavage		osa-miR172d-3p	LOC_Os07g13170.1	0.5	1404	1424	AGAAUCUUGAUGAUGCUGCAU	CUGCAGCAUCAUCAGGAUUCU	Cleavage	cDNA|AP2 domain containing protein, expressed
osa-miR1862c	XLOC_006652	4.5	324	347	ACGAGGUUGGUUUAUUUUGGGACG	AGGCCCAAACCAAGUCGACCUCGA	Cleavage		osa-miR172d-3p	LOC_Os05g03040.1	0.5	1976	1996	AGAAUCUUGAUGAUGCUGCAU	CUGCAGCAUCAUCAGGAUUCU	Cleavage	cDNA|AP2 domain containing protein, expressed
osa-miR1863b.2	XLOC_050893	4.5	2141	2163	AGAGACUUGGCUGAUGCAUUACU	AAUAAUGUAUCGGCUAAAGCUCU	Cleavage		osa-miR172d-3p	LOC_Os05g03040.3	0.5	2089	2109	AGAAUCUUGAUGAUGCUGCAU	CUGCAGCAUCAUCAGGAUUCU	Cleavage	cDNA|AP2 domain containing protein, expressed
osa-miR1869	XLOC_043574	4.5	3024	3047	UGAGAACAAUAGGCAUGGGAGGUA	UAUUACCUAUUCUCAUUGUUCUUG	Translation		osa-miR1848	LOC_Os08g29780.1	0.5	191	211	CCUCGCCGGCGCGCGCGUGCA	GUCACGCGCGCGCCGGCGGGG	Cleavage	cDNA|expressed protein
osa-miR1871	XLOC_024683	4.5	151	174	AUGGCUCUGAUAUCAUGUUGGUUU	GUGCUCUCAUCCUAUCAGAGCCAU	Cleavage		osa-miR1851	LOC_Os01g61520.1	0.5	370	390	CGUCUGGGAUGGCAUUUUGGC	GCCAAAAUGCCAUCCCGGACG	Cleavage	cDNA|expressed protein
osa-miR1878	XLOC_042735	4.5	95	118	ACUUAAUCUGGACACUAUAAAAGA	GCAUUCAUGUUGUCCACAUUGAGU	Cleavage		osa-miR1858a	LOC_Os01g53800.1	0.5	330	350	GAGAGGAGGACGGAGUGGGGC	GCCCUACUCCGUCCUCCUCUC	Cleavage	cDNA|glutamate carboxypeptidase 2, putative, expressed
osa-miR1881	XLOC_030131	4.5	122	145	AAUGUUAUUGUAGCGUGGUGGUGU	UGAGCGCCACAUUGCCAUGACAUU	Cleavage		osa-miR1858b	LOC_Os01g53800.1	0.5	330	350	GAGAGGAGGACGGAGUGGGGC	GCCCUACUCCGUCCUCCUCUC	Cleavage	cDNA|glutamate carboxypeptidase 2, putative, expressed
osa-miR1883a	XLOC_001451	4.5	2529	2552	ACCUGUGACGGGCCGAGAAUGGAA	UAAUGUGUUUGGCACGUCAUGGGU	Translation		osa-miR1861c	LOC_Os01g63810.2	0.5	608	629	CGAUCUUGUAGCAAGAACUGAG	UCAAGUUCUUGCUGCAAGAUCG	Cleavage	cDNA|starch binding domain containing protein, putative, expressed
osa-miR1883b	XLOC_001451	4.5	2529	2552	ACCUGUGACGGGCCGAGAAUGGAA	UAAUGUGUUUGGCACGUCAUGGGU	Translation		osa-miR1861c	LOC_Os01g63810.1	0.5	664	685	CGAUCUUGUAGCAAGAACUGAG	UCAAGUUCUUGCUGCAAGAUCG	Cleavage	cDNA|starch binding domain containing protein, putative, expressed
osa-miR2092-5p	XLOC_024683	4.5	1789	1809	CAACUGAAGUCGGUGUUUACU	AAUGCACACUGAUUUUACUUG	Cleavage		osa-miR397a	LOC_Os01g62490.1	0.5	761	781	UCAUUGAGUGCAGCGUUGAUG	CAUCAACGCUGCGCUCAAUGA	Cleavage	cDNA|laccase precursor protein, putative, expressed
osa-miR2096-3p	XLOC_009885	4.5	335	355	CCUGAGGGGAAAUCGGCGGGA	UCCUCUCCAUUUCCCCUCAAG	Cleavage		osa-miR437	LOC_Os02g42350.1	0.5	1559	1579	AAAGUUAGAGAAGUUUGACUU	AAGUUAAACUUCUCUAACUUU	Cleavage	cDNA|nitrilase, putative, expressed
osa-miR2097-3p	XLOC_005292	4.5	237	257	UUCUCUUCUUCGUGUCGCAUUU	GUCUGC-ACGCAGAGAAGAGAA	Translation		osa-miR437	LOC_Os06g46670.2	0.5	3855	3875	AAAGUUAGAGAAGUUUGACUU	AAGUCAAAUUUCUCUAACUUU	Cleavage	cDNA|glutamate receptor, putative, expressed
osa-miR2105	XLOC_043574	4.5	5030	5049	UUGUGAUGUGAAUGAUUCAU	UUGAAGUAUUUAAAUCGCGA	Cleavage		osa-miR444a-3p.2	LOC_Os08g06510.1	0.5	1371	1391	UGCAGUUGCUGCCUCAAGCUU	GAGCUUGAGGCAGCAGCUGCA	Cleavage	cDNA|zinc finger, C3HC4 type domain containing protein, expressed
osa-miR2118b	XLOC_045627	4.5	205	226	UUCCCGAUGCCUCCCAUUCCUA	AAGGAAGGAGAGGCGGCGGGAG	Cleavage		osa-miR444d.2	LOC_Os08g06510.1	0.5	1371	1391	UGCAGUUGCUGCCUCAAGCUU	GAGCUUGAGGCAGCAGCUGCA	Cleavage	cDNA|zinc finger, C3HC4 type domain containing protein, expressed
osa-miR2118n	XLOC_045627	4.5	205	226	UUCCCGAUGCCUCCCAUUCCUA	AAGGAAGGAGAGGCGGCGGGAG	Cleavage		osa-miR444e	LOC_Os08g06510.1	0.5	1371	1391	UGCAGUUGCUGCCUCAAGCUU	GAGCUUGAGGCAGCAGCUGCA	Cleavage	cDNA|zinc finger, C3HC4 type domain containing protein, expressed
osa-miR2118o	XLOC_048354	4.5	4653	4674	CUCCUGAUGCCUCCCAAGCCUA	UGUGAUUGAGAGGCAUCAGUAA	Cleavage		osa-miR444f	LOC_Os02g49840.1	0.5	613	633	UGCAGUUGUUGCCUCAAGCUU	AAGCUUGAGGCAGCAACUGCA	Cleavage	cDNA|OsMADS57 - MADS-box family gene with MIKCc type-box, expressed
osa-miR2122	XLOC_048525	4.5	1820	1841	UUUCAAAAAUAACCUUUUGUUC	GUUAAAAUGGGUAUUUUUGAAU	Cleavage		osa-miR444f	LOC_Os02g49840.4	0.5	613	633	UGCAGUUGUUGCCUCAAGCUU	AAGCUUGAGGCAGCAACUGCA	Cleavage	cDNA|OsMADS57 - MADS-box family gene with MIKCc type-box, expressed
osa-miR2275c	XLOC_045515	4.5	811	833	AGAAUUGGAGGAAAACAAACUGA	UCAGUUUGUUUUCUUCCAAUAGC	Cleavage		osa-miR444f	LOC_Os02g49840.2	0.5	613	633	UGCAGUUGUUGCCUCAAGCUU	AAGCUUGAGGCAGCAACUGCA	Cleavage	cDNA|OsMADS57 - MADS-box family gene with MIKCc type-box, expressed
osa-miR2863b	XLOC_048354	4.5	3638	3658	UUCGUUUAUUUGGACUAGAGU	AACCUAGUUCAAAUGUAUGGA	Cleavage		osa-miR444f	LOC_Os02g49840.3	0.5	613	633	UGCAGUUGUUGCCUCAAGCUU	AAGCUUGAGGCAGCAACUGCA	Cleavage	cDNA|OsMADS57 - MADS-box family gene with MIKCc type-box, expressed
osa-miR2863c	XLOC_018755	4.5	518	543	UUAGUAGGACUAGA--AUGGGCCAAA	UUGCUCCCAUCCUCUACUUCUACUAA	Translation		osa-miR444f	LOC_Os08g33488.1	0.5	311	331	UGCAGUUGUUGCCUCAAGCUU	AAGCUUGAGGCAGCAACUGCA	Cleavage	cDNA|OsMADS23 - MADS-box family gene with MIKCc type-box, expressed
osa-miR2867-3p	XLOC_035629	4.5	56	75	CCAGGACGUGUGGGAUGGCA	CGUCAUCUGGUAUGUCUUGG	Cleavage		osa-miR5075	LOC_Os11g42440.1	0.5	108	128	UUCUCCGUCGCCGCCGUCCGC	CGGGACGGCGGCGGCGGAGAA	Cleavage	cDNA|expressed protein
osa-miR2873a	XLOC_001451	4.5	2650	2672	AAGUUUGGACUUAAAUUUGGUAAC	GUUAG-AAACUUAAUUCCAAACUU	Translation		osa-miR5162	LOC_Os10g41920.1	0.5	1293	1316	AAAUGACCAAAAUACCCCUAGAAC	UAAUAAGGGGUGUUUUGGUCAUUU	Cleavage	cDNA|expressed protein
osa-miR2873b	XLOC_049851	4.5	389	409	UUGGACUUGAGAUUUGGUAUG	AGUGCCAAAUUUCGAGUUGAU	Cleavage		osa-miR529b	LOC_Os08g39890.1	0.5	987	1007	AGAAGAGAGAGAGUACAGCUU	GAGCUGUGCUCUCUCUCUUCU	Cleavage	cDNA|OsSPL14 - SBP-box gene family member, expressed
osa-miR2931	XLOC_049807	4.5	107	126	CUUUAUUGUUGAUGUCAAAA	UUAGGUUAUUAACAAUAGAG	Cleavage		osa-miR529b	LOC_Os09g31438.1	0.5	804	824	AGAAGAGAGAGAGUACAGCUU	CAGCUGUGCUCUCUCUCUUCU	Cleavage	cDNA|OsSPL17 - SBP-box gene family member, expressed
osa-miR319a-3p	XLOC_018841	4.5	10	30	ACUGGAUGACGCGGGAGCUAA	AAAGGUCCUGUGUUUUUCAGU	Cleavage		osa-miR5540	LOC_Os10g36130.1	0.5	151	171	UUGUGCGAGAUCGACGGUAUA	UAUACCGUCGGUCUCGCACAA	Cleavage	cDNA|hypothetical protein
osa-miR395f	XLOC_047073	4.5	286	306	GUGAAUUGUUUGGGGGAACUC	AUGCUCCUUCAAACAAUACAA	Cleavage		osa-miR5799	LOC_Os12g38210.1	0.5	2476	2499	AAGACGAAUAAUCAAACGUUGGAC	GUCUAACGUUUGAUUGUUCGUCUU	Cleavage	cDNA|spotted leaf 11, putative, expressed
osa-miR395u	XLOC_024683	4.5	1871	1891	GUGAAGCGUUUGGGGGAAAUC	CGUUUUGCCCAAAUGGUUCAA	Cleavage		osa-miR5799	LOC_Os07g26595.1	0.5	135	158	AAGACGAAUAAUCAAACGUUGGAC	UAAAUACGUUUGAUUGUUCGUCUU	Cleavage	cDNA|expressed protein
osa-miR395x	XLOC_035128	4.5	1071	1091	GUGAAGUGUUUGGAGUAGCUC	UAGCUACUCCAGCUGUUUCAG	Cleavage		osa-miR5808	LOC_Os08g42490.1	0.5	920	943	ACUAAAUCGUUUCUGAUCGUUGGA	UCCAACGAUCGGAAACGAUUUAGU	Cleavage	cDNA|DC1 domain containing protein, expressed
osa-miR396f-5p	XLOC_037804	4.5	991	1012	UCUCCACAGGCUUUCUUGAACU	AACUCAAGAAACUUUGUGGUGG	Translation		osa-miR5830	LOC_Os01g64900.1	0.5	1831	1854	AUGUAGAUGAGGUGAUGUUACACA	UCUGCAACAUCAUCUCAUCUACAU	Cleavage	cDNA|HEAT, putative, expressed
osa-miR3979-3p	XLOC_000467	4.5	1672	1690	CUUCGGGGGAGGAGAGAAGC	UCUUCUCUC-UCCCUUGGAG	Translation		osa-miR5833	LOC_Os07g28810.1	0.5	593	613	UCCUCCUCGGGCUCAUCGGGC	GCCCGAUGAGCCUGAGGAGGA	Cleavage	cDNA|expressed protein
osa-miR3979-5p	XLOC_042735	4.5	386	405	UCUCUCUCUCCCUUGAAGGC	GACAUCCAGAGAGAGAGAGA	Translation		osa-miR812a	LOC_Os02g23823.2	0.5	388	409	GACGGACGGUUAAACGUUGGAC	GUCCAACGUUUGACCGUCCGUC	Cleavage	cDNA|helix-loop-helix DNA-binding domain containing protein, expressed
osa-miR418	XLOC_018843	4.5	472	492	UAAUGUGAUGAUGAAAUGACG	GUUUACUGCAGCAUCACAUUG	Translation		osa-miR812a	LOC_Os07g26690.1	0.5	1326	1347	GACGGACGGUUAAACGUUGGAC	GUUCAACGUUUGACCGUCCGUC	Cleavage	cDNA|aquaporin protein, putative, expressed
osa-miR426	XLOC_035694	4.5	65	85	UUUUGGAAGUUUGUCCUUACG	UGCAAGGACAAUCUUUCAGAC	Translation		osa-miR812a	LOC_Os07g26690.2	0.5	1450	1471	GACGGACGGUUAAACGUUGGAC	GUUCAACGUUUGACCGUCCGUC	Cleavage	cDNA|aquaporin protein, putative, expressed
osa-miR444b.2	XLOC_014043	4.5	226	246	UGCAGUUGUUGUCUCAAGCUU	AUGUUUGCUGCAGCAACUGCG	Cleavage		osa-miR812a	LOC_Os03g22050.4	0.5	1922	1943	GACGGACGGUUAAACGUUGGAC	GCUCAACGUUUGACCGUCCGUC	Cleavage	cDNA|CAMK_KIN1/SNF1/Nim1_like.16 - CAMK includes calcium/calmodulin depedent protein kinases, expressed
osa-miR444c.2	XLOC_014043	4.5	226	246	UGCAGUUGUUGUCUCAAGCUU	AUGUUUGCUGCAGCAACUGCG	Cleavage		osa-miR812a	LOC_Os03g22050.3	0.5	2877	2898	GACGGACGGUUAAACGUUGGAC	GCUCAACGUUUGACCGUCCGUC	Cleavage	cDNA|CAMK_KIN1/SNF1/Nim1_like.16 - CAMK includes calcium/calmodulin depedent protein kinases, expressed
osa-miR5079a	XLOC_001451	4.5	3180	3201	UUUGGAUCUGUUAUUUUGGUAU	AAACUAAGUUCACGGAUCUAAA	Cleavage		osa-miR812a	LOC_Os03g22050.2	0.5	2908	2929	GACGGACGGUUAAACGUUGGAC	GCUCAACGUUUGACCGUCCGUC	Cleavage	cDNA|CAMK_KIN1/SNF1/Nim1_like.16 - CAMK includes calcium/calmodulin depedent protein kinases, expressed
osa-miR5079b	XLOC_001451	4.5	3180	3201	UUUGGAUCUGUUAUUUUGGUAU	AAACUAAGUUCACGGAUCUAAA	Cleavage		osa-miR812a	LOC_Os03g22050.1	0.5	2914	2935	GACGGACGGUUAAACGUUGGAC	GCUCAACGUUUGACCGUCCGUC	Cleavage	cDNA|CAMK_KIN1/SNF1/Nim1_like.16 - CAMK includes calcium/calmodulin depedent protein kinases, expressed
osa-miR5082	XLOC_048525	4.5	75	98	UGCGAUGAUGGCCGCGCGGGUUCA	UCUCCAUGUCCGGCCAUCAUUGCC	Cleavage		osa-miR812b	LOC_Os02g23823.2	0.5	388	409	GACGGACGGUUAAACGUUGGAC	GUCCAACGUUUGACCGUCCGUC	Cleavage	cDNA|helix-loop-helix DNA-binding domain containing protein, expressed
osa-miR5144-3p	XLOC_048525	4.5	395	415	UCUCCUCAGCAGCACAAGAAG	UCUCUGUUGUUGCUCGGGAGA	Cleavage		osa-miR812b	LOC_Os07g26690.1	0.5	1326	1347	GACGGACGGUUAAACGUUGGAC	GUUCAACGUUUGACCGUCCGUC	Cleavage	cDNA|aquaporin protein, putative, expressed
osa-miR5145	XLOC_001451	4.5	3183	3206	ACCUGUUUGGAUUCUUGAGGGCUA	CUAAGUUCACGGAUCUAAACGUGU	Cleavage		osa-miR812b	LOC_Os07g26690.2	0.5	1450	1471	GACGGACGGUUAAACGUUGGAC	GUUCAACGUUUGACCGUCCGUC	Cleavage	cDNA|aquaporin protein, putative, expressed
osa-miR5151	XLOC_045209	4.5	49	70	UAAUGAUGUGGGUACGAAUGAA	AUAAUUCGUAUUUUCAUUGUUG	Cleavage		osa-miR812b	LOC_Os03g22050.4	0.5	1922	1943	GACGGACGGUUAAACGUUGGAC	GCUCAACGUUUGACCGUCCGUC	Cleavage	cDNA|CAMK_KIN1/SNF1/Nim1_like.16 - CAMK includes calcium/calmodulin depedent protein kinases, expressed
osa-miR5160	XLOC_045202	4.5	317	338	CGAGAUCGAUGGUAUAUUUCUG	GAAGAAUGUAUUCUUGAUCUUG	Translation		osa-miR812b	LOC_Os03g22050.3	0.5	2877	2898	GACGGACGGUUAAACGUUGGAC	GCUCAACGUUUGACCGUCCGUC	Cleavage	cDNA|CAMK_KIN1/SNF1/Nim1_like.16 - CAMK includes calcium/calmodulin depedent protein kinases, expressed
osa-miR529b	XLOC_018755	4.5	295	315	AGAAGAGAGAGAGUACAGCUU	UCGUUGUCCCCUCUCUCCUCU	Cleavage		osa-miR812b	LOC_Os03g22050.2	0.5	2908	2929	GACGGACGGUUAAACGUUGGAC	GCUCAACGUUUGACCGUCCGUC	Cleavage	cDNA|CAMK_KIN1/SNF1/Nim1_like.16 - CAMK includes calcium/calmodulin depedent protein kinases, expressed
osa-miR5338	XLOC_037804	4.5	1557	1577	UGAAGCUUCAGUUGGUUGUAU	UCCCAACUAAGUGAAUCUUCA	Translation		osa-miR812b	LOC_Os03g22050.1	0.5	2914	2935	GACGGACGGUUAAACGUUGGAC	GCUCAACGUUUGACCGUCCGUC	Cleavage	cDNA|CAMK_KIN1/SNF1/Nim1_like.16 - CAMK includes calcium/calmodulin depedent protein kinases, expressed
osa-miR5340	XLOC_048525	4.5	3124	3146	UGAUGACGUGGAUGAAUUUCAAA	CAUCGAAUACGUCCUUGUCGUCA	Cleavage		osa-miR812c	LOC_Os02g23823.2	0.5	388	409	GACGGACGGUUAAACGUUGGAC	GUCCAACGUUUGACCGUCCGUC	Cleavage	cDNA|helix-loop-helix DNA-binding domain containing protein, expressed
osa-miR5488	XLOC_005930	4.5	3126	3146	UGAAGGCGACUGAUGAUUUCA	CAGACUGAUCGGUUGCCUUCC	Cleavage		osa-miR812c	LOC_Os07g26690.1	0.5	1326	1347	GACGGACGGUUAAACGUUGGAC	GUUCAACGUUUGACCGUCCGUC	Cleavage	cDNA|aquaporin protein, putative, expressed
osa-miR5489	XLOC_001451	4.5	2401	2421	CAGGUGUUCUCGAUGGCUUCC	UAAAGACCUCGGGAACGCCAG	Cleavage		osa-miR812c	LOC_Os07g26690.2	0.5	1450	1471	GACGGACGGUUAAACGUUGGAC	GUUCAACGUUUGACCGUCCGUC	Cleavage	cDNA|aquaporin protein, putative, expressed
osa-miR5491	XLOC_051299	4.5	935	955	UGAAAUGGAGGCUCGUUGUAC	UUGCAUUGAGGUUUCAUUUCA	Translation		osa-miR812c	LOC_Os03g22050.4	0.5	1922	1943	GACGGACGGUUAAACGUUGGAC	GCUCAACGUUUGACCGUCCGUC	Cleavage	cDNA|CAMK_KIN1/SNF1/Nim1_like.16 - CAMK includes calcium/calmodulin depedent protein kinases, expressed
osa-miR5503	XLOC_049782	4.5	22	43	UUCGGAUCUUUCUAGAGGCAUU	GAUGUCUUUAGAGAGAACUGAU	Cleavage		osa-miR812c	LOC_Os03g22050.3	0.5	2877	2898	GACGGACGGUUAAACGUUGGAC	GCUCAACGUUUGACCGUCCGUC	Cleavage	cDNA|CAMK_KIN1/SNF1/Nim1_like.16 - CAMK includes calcium/calmodulin depedent protein kinases, expressed
osa-miR5508	XLOC_043574	4.5	1197	1217	UAGAUGGCUGAUCUGGUGUGG	AAACUCCAUACCAGCCAUUUA	Translation		osa-miR812c	LOC_Os03g22050.2	0.5	2908	2929	GACGGACGGUUAAACGUUGGAC	GCUCAACGUUUGACCGUCCGUC	Cleavage	cDNA|CAMK_KIN1/SNF1/Nim1_like.16 - CAMK includes calcium/calmodulin depedent protein kinases, expressed
osa-miR5512a	XLOC_050893	4.5	1122	1142	UAGGAUAUGGUAAUGCUAAAA	UUCUACCAUUACCAUGUACUG	Cleavage		osa-miR812c	LOC_Os03g22050.1	0.5	2914	2935	GACGGACGGUUAAACGUUGGAC	GCUCAACGUUUGACCGUCCGUC	Cleavage	cDNA|CAMK_KIN1/SNF1/Nim1_like.16 - CAMK includes calcium/calmodulin depedent protein kinases, expressed
osa-miR5512b	XLOC_050893	4.5	1122	1142	UAGGAUAUGGUAAUGCUAAAA	UUCUACCAUUACCAUGUACUG	Cleavage		osa-miR812d	LOC_Os02g23823.2	0.5	388	409	GACGGACGGUUAAACGUUGGAC	GUCCAACGUUUGACCGUCCGUC	Cleavage	cDNA|helix-loop-helix DNA-binding domain containing protein, expressed
osa-miR5530	XLOC_034366	4.5	185	205	AGUGGUGUCGUAUUACCUGCC	AGCAUGUUAUACGGCACUGCA	Cleavage		osa-miR812d	LOC_Os07g26690.1	0.5	1326	1347	GACGGACGGUUAAACGUUGGAC	GUUCAACGUUUGACCGUCCGUC	Cleavage	cDNA|aquaporin protein, putative, expressed
osa-miR5534a	XLOC_018755	4.5	258	278	UGACGACAACAGCUAGAAUGG	GGACCCUAGCUGUUGUUGUUG	Cleavage		osa-miR812d	LOC_Os07g26690.2	0.5	1450	1471	GACGGACGGUUAAACGUUGGAC	GUUCAACGUUUGACCGUCCGUC	Cleavage	cDNA|aquaporin protein, putative, expressed
osa-miR5534b	XLOC_018755	4.5	258	278	CGAUGACAACAGCUAGAAUGG	GGACCCUAGCUGUUGUUGUUG	Cleavage		osa-miR812d	LOC_Os03g22050.4	0.5	1922	1943	GACGGACGGUUAAACGUUGGAC	GCUCAACGUUUGACCGUCCGUC	Cleavage	cDNA|CAMK_KIN1/SNF1/Nim1_like.16 - CAMK includes calcium/calmodulin depedent protein kinases, expressed
osa-miR5536	XLOC_049851	4.5	677	698	AAUGGUAGUGACAUUAUGGUAG	CAUCCAUAGCGUCACCACUGUU	Cleavage		osa-miR812d	LOC_Os03g22050.3	0.5	2877	2898	GACGGACGGUUAAACGUUGGAC	GCUCAACGUUUGACCGUCCGUC	Cleavage	cDNA|CAMK_KIN1/SNF1/Nim1_like.16 - CAMK includes calcium/calmodulin depedent protein kinases, expressed
osa-miR5537	XLOC_037804	4.5	1474	1495	AAUGUUUGUAUGGAUCGUUUGU	CAAAAUGAACAAUACGAGUAUU	Cleavage		osa-miR812d	LOC_Os03g22050.2	0.5	2908	2929	GACGGACGGUUAAACGUUGGAC	GCUCAACGUUUGACCGUCCGUC	Cleavage	cDNA|CAMK_KIN1/SNF1/Nim1_like.16 - CAMK includes calcium/calmodulin depedent protein kinases, expressed
osa-miR5788	XLOC_024683	4.5	1689	1709	UGGAUGUGACAUACUCUAGUA	UGCUUGCGUAUGUCAUAUGUA	Cleavage		osa-miR812d	LOC_Os03g22050.1	0.5	2914	2935	GACGGACGGUUAAACGUUGGAC	GCUCAACGUUUGACCGUCCGUC	Cleavage	cDNA|CAMK_KIN1/SNF1/Nim1_like.16 - CAMK includes calcium/calmodulin depedent protein kinases, expressed
osa-miR5808	XLOC_005930	4.5	1845	1868	ACUAAAUCGUUUCUGAUCGUUGGA	UUAUACCAUGGGAAAUGAUAUAGU	Cleavage		osa-miR812e	LOC_Os02g23823.2	0.5	388	409	GACGGACGGUUAAACGUUGGAC	GUCCAACGUUUGACCGUCCGUC	Cleavage	cDNA|helix-loop-helix DNA-binding domain containing protein, expressed
osa-miR5814	XLOC_024683	4.5	779	802	AAUCAAGUUAGGAACCAUGCAAGU	CUUUUCAUGUUAAUUAACUUGAUU	Cleavage		osa-miR812e	LOC_Os07g26690.1	0.5	1326	1347	GACGGACGGUUAAACGUUGGAC	GUUCAACGUUUGACCGUCCGUC	Cleavage	cDNA|aquaporin protein, putative, expressed
osa-miR5827	XLOC_054212	4.5	235	255	UUUGUUGCAAUUUGGACUACC	AUUAUUCUAGAUUGUGUCAAA	Cleavage		osa-miR812e	LOC_Os07g26690.2	0.5	1450	1471	GACGGACGGUUAAACGUUGGAC	GUUCAACGUUUGACCGUCCGUC	Cleavage	cDNA|aquaporin protein, putative, expressed
osa-miR5828	XLOC_051299	4.5	517	537	UUACGGCAUUAAAAGUAAAUC	AUUUAAGUUUUAAUGUCUUGA	Cleavage		osa-miR812e	LOC_Os03g22050.4	0.5	1922	1943	GACGGACGGUUAAACGUUGGAC	GCUCAACGUUUGACCGUCCGUC	Cleavage	cDNA|CAMK_KIN1/SNF1/Nim1_like.16 - CAMK includes calcium/calmodulin depedent protein kinases, expressed
osa-miR5829	XLOC_002582	4.5	1429	1452	AUCAGGACCAGUAGGCGAUGGUAA	CACAUUUUGCUUGCUGGUCCUUGU	Cleavage		osa-miR812e	LOC_Os03g22050.3	0.5	2877	2898	GACGGACGGUUAAACGUUGGAC	GCUCAACGUUUGACCGUCCGUC	Cleavage	cDNA|CAMK_KIN1/SNF1/Nim1_like.16 - CAMK includes calcium/calmodulin depedent protein kinases, expressed
osa-miR5830	XLOC_030063	4.5	121	144	AUGUAGAUGAGGUGAUGUUACACA	UCCUUGUCUUCACCUCGUCUGCAA	Cleavage		osa-miR812e	LOC_Os03g22050.2	0.5	2908	2929	GACGGACGGUUAAACGUUGGAC	GCUCAACGUUUGACCGUCCGUC	Cleavage	cDNA|CAMK_KIN1/SNF1/Nim1_like.16 - CAMK includes calcium/calmodulin depedent protein kinases, expressed
osa-miR5832	XLOC_043574	4.5	948	968	UUGGCGGAGCGGUUGCUGUCA	UGAUCCUAGCCGCUCCGCCAC	Cleavage		osa-miR812e	LOC_Os03g22050.1	0.5	2914	2935	GACGGACGGUUAAACGUUGGAC	GCUCAACGUUUGACCGUCCGUC	Cleavage	cDNA|CAMK_KIN1/SNF1/Nim1_like.16 - CAMK includes calcium/calmodulin depedent protein kinases, expressed
osa-miR5833	XLOC_022714	4.5	705	725	UCCUCCUCGGGCUCAUCGGGC	UUGCGCAGAGCCGGAGGAGGA	Cleavage		osa-miR812g	LOC_Os02g07960.4	0.5	3484	3507	AAGACGGAUGAUUAAAGUUGGACA	UGCCCAACUUUAAUCGUCCGUCUU	Cleavage	cDNA|STRUBBELIG-RECEPTOR FAMILY 3 precursor, putative, expressed
osa-miR5836	XLOC_030063	4.5	93	113	UGAGCAGCCGGACCAUGGGAU	CUCCAAUGGCCAGGUUGCUCA	Translation		osa-miR812g	LOC_Os04g47140.1	0.5	658	681	AAGACGGAUGAUUAAAGUUGGACA	CGCCCAACUUUGAUCAUCCGUCUU	Cleavage	cDNA|expressed protein
osa-miR5837.1	XLOC_033278	4.5	241	261	AUGUUGGAAUGACAUGCAGCU	AAUUGCAGGUCAUUCUAGUGA	Cleavage		osa-miR812h	LOC_Os02g07960.4	0.5	3484	3507	AAGACGGAUGAUUAAAGUUGGACA	UGCCCAACUUUAAUCGUCCGUCUU	Cleavage	cDNA|STRUBBELIG-RECEPTOR FAMILY 3 precursor, putative, expressed
osa-miR6251	XLOC_051299	4.5	1008	1028	UGUGUAGCCACAUUGUAAGGG	UUCUUACAAGGUGGUUAUGUU	Cleavage		osa-miR812h	LOC_Os04g47140.1	0.5	658	681	AAGACGGAUGAUUAAAGUUGGACA	CGCCCAACUUUGAUCAUCCGUCUU	Cleavage	cDNA|expressed protein
osa-miR7694-3p	XLOC_009885	4.5	363	384	CCAUAUUCGUAGUGCUAGGUGG	AAGGAUGGUGCUACGAGUGUGG	Cleavage		osa-miR812i	LOC_Os02g07960.4	0.5	3484	3507	AAGACGGAUGAUUAAAGUUGGACA	UGCCCAACUUUAAUCGUCCGUCUU	Cleavage	cDNA|STRUBBELIG-RECEPTOR FAMILY 3 precursor, putative, expressed
osa-miR812o-3p	XLOC_018843	4.5	10	33	GAACGGUCAAAUGUUAGACACGGA	CUCCUGUUUAGCAUUUCGUCGUUG	Cleavage		osa-miR812i	LOC_Os04g47140.1	0.5	658	681	AAGACGGAUGAUUAAAGUUGGACA	CGCCCAACUUUGAUCAUCCGUCUU	Cleavage	cDNA|expressed protein
osa-miR1320-5p	XLOC_006019	5	609	629	UGGAACGGAGGAAUUUUAUAG	AUUUGAAAUUCCUUCAUGCCA	Cleavage		osa-miR812j	LOC_Os02g07960.4	0.5	3484	3507	AAGACGGAUGAUUAAAGUUGGACA	UGCCCAACUUUAAUCGUCCGUCUU	Cleavage	cDNA|STRUBBELIG-RECEPTOR FAMILY 3 precursor, putative, expressed
osa-miR1428a-5p	XLOC_030045	5	526	546	CGUUUUGCAAAUUCGCAGGCC	GUAUUGCAAGUUUGUAAAGCU	Cleavage		osa-miR812j	LOC_Os04g47140.1	0.5	658	681	AAGACGGAUGAUUAAAGUUGGACA	CGCCCAACUUUGAUCAUCCGUCUU	Cleavage	cDNA|expressed protein
osa-miR1428e-5p	XLOC_035629	5	563	584	AAUUCACAGGCCCUAUCUUGUG	ACCAAUAUAGGGUGUGUUAGUU	Cleavage		osa-miR812o-3p	LOC_Os11g09260.1	0.5	893	916	GAACGGUCAAAUGUUAGACACGGA	UUCGUGUCUAACGUUUGACCGUUC	Cleavage	cDNA|expressed protein
osa-miR1428f-5p	XLOC_035629	5	563	584	AAUUCACAGGCCCUAUCUUGUG	ACCAAUAUAGGGUGUGUUAGUU	Cleavage		osa-miR812p	LOC_Os02g53180.2	0.5	1366	1389	GACGGACGAUUAAAGUUGGGCAUG	CGCGUCCAACUUUGAUCGUCCGUC	Cleavage	cDNA|1-aminocyclopropane-1-carboxylate oxidase protein, putative, expressed
osa-miR1428g-5p	XLOC_035629	5	563	584	AAUUCACAGGCCCUAUCUUGUG	ACCAAUAUAGGGUGUGUUAGUU	Cleavage		osa-miR812s	LOC_Os12g38210.1	0.5	2476	2499	AAGACGGACAAUCAAACGUUGGAC	GUCUAACGUUUGAUUGUUCGUCUU	Cleavage	cDNA|spotted leaf 11, putative, expressed
osa-miR1430	XLOC_005930	5	2939	2959	UGGUGAGCCUUCCUGGCUAAG	CCUGGUCAGGGACGUUCUCCA	Cleavage		osa-miR812s	LOC_Os08g06478.1	0.5	1388	1411	AAGACGGACAAUCAAACGUUGGAC	UUUCCAUGUUUGAUUGUCCGUCUU	Cleavage	cDNA|expressed protein
osa-miR1437b-5p	XLOC_030606	5	52	72	GGGAGGAAACAGUGCCUAGUG	UGCUAGGGUUUGUUCCCUCUC	Cleavage		osa-miR812s	LOC_Os07g26595.1	0.5	135	158	AAGACGGACAAUCAAACGUUGGAC	UAAAUACGUUUGAUUGUUCGUCUU	Cleavage	cDNA|expressed protein
osa-miR1438	XLOC_001451	5	3456	3476	AGGGUAAUUUUAUCAUUUUUAA	UCUAAAAU-AUGAAAUUAGUUU	Cleavage		osa-miR815a	LOC_Os05g40910.1	0.5	971	991	AAGGGGAUUGAGGAGAUUGGG	UCUAAUCUCCUCAAUCCCCUU	Cleavage	cDNA|expressed protein
osa-miR160f-3p	XLOC_002582	5	1404	1424	GCAUUGAGGGAGUCAUGCAGG	UUUGUCUUACUCCCUCGGUCC	Cleavage		osa-miR815b	LOC_Os05g40910.1	0.5	971	991	AAGGGGAUUGAGGAGAUUGGG	UCUAAUCUCCUCAAUCCCCUU	Cleavage	cDNA|expressed protein
osa-miR164c	XLOC_040333	5	728	747	UGGAGAAGCAGGGUACGUGCA	UCCAC-UAACUUGUUUCUUCA	Cleavage		osa-miR815c	LOC_Os05g40910.1	0.5	971	991	AAGGGGAUUGAGGAGAUUGGG	UCUAAUCUCCUCAAUCCCCUU	Cleavage	cDNA|expressed protein
osa-miR166l-5p	XLOC_054216	5	269	289	GGAUUGUUGUCUGGUUCAAGG	UCCAGAACCAGGGAAUAAUCU	Cleavage		osa-miR818a	LOC_Os09g24520.1	0.5	2226	2247	AAUCCCUUAUAUUAUGGGACGG	CCGUCUCAUAAUAUAAGGGAUU	Cleavage	cDNA|pentatricopeptide, putative, expressed
osa-miR169d	XLOC_014043	5	723	743	UAGCCAAGGAUGAAUUGCCGG	AAGGCAAAUUACUAUUGGCUA	Translation		osa-miR818a	LOC_Os09g24520.2	0.5	2418	2439	AAUCCCUUAUAUUAUGGGACGG	CCGUCUCAUAAUAUAAGGGAUU	Cleavage	cDNA|pentatricopeptide, putative, expressed
osa-miR169e	XLOC_014043	5	723	743	UAGCCAAGGAUGACUUGCCGG	AAGGCAAAUUACUAUUGGCUA	Translation		osa-miR818a	LOC_Os03g48010.1	0.5	2433	2454	AAUCCCUUAUAUUAUGGGACGG	CCGUUCCAUAAUAUAAGGGAUU	Cleavage	cDNA|exostosin, putative, expressed
osa-miR169f.1	XLOC_014043	5	723	743	UAGCCAAGGAUGACUUGCCUA	AAGGCAAAUUACUAUUGGCUA	Translation		osa-miR818a	LOC_Os12g16350.13	0.5	3286	3307	AAUCCCUUAUAUUAUGGGACGG	CCGUCCCAUAAUAUAGGGGAUU	Cleavage	cDNA|enoyl-CoA hydratase/isomerase family protein, putative, expressed
osa-miR169g	XLOC_014043	5	723	743	UAGCCAAGGAUGACUUGCCUA	AAGGCAAAUUACUAUUGGCUA	Translation		osa-miR818a	LOC_Os05g45580.1	0.5	2009	2030	AAUCCCUUAUAUUAUGGGACGG	UUGUCUCAUAAUAUAAGGGAUU	Cleavage	cDNA|expressed protein
osa-miR169h	XLOC_014043	5	723	743	UAGCCAAGGAUGACUUGCCUG	AAGGCAAAUUACUAUUGGCUA	Translation		osa-miR818a	LOC_Os08g29760.1	0.5	1905	1926	AAUCCCUUAUAUUAUGGGACGG	CCAUCCUAUAAUAUAAGGGAUU	Cleavage	cDNA|membrane protein, putative, expressed
osa-miR169i-5p.1	XLOC_014043	5	723	743	UAGCCAAGGAUGACUUGCCUG	AAGGCAAAUUACUAUUGGCUA	Translation		osa-miR818b	LOC_Os09g24520.1	0.5	2226	2247	AAUCCCUUAUAUUAUGGGACGG	CCGUCUCAUAAUAUAAGGGAUU	Cleavage	cDNA|pentatricopeptide, putative, expressed
osa-miR169j	XLOC_014043	5	723	743	UAGCCAAGGAUGACUUGCCUG	AAGGCAAAUUACUAUUGGCUA	Translation		osa-miR818b	LOC_Os09g24520.2	0.5	2418	2439	AAUCCCUUAUAUUAUGGGACGG	CCGUCUCAUAAUAUAAGGGAUU	Cleavage	cDNA|pentatricopeptide, putative, expressed
osa-miR169k	XLOC_014043	5	723	743	UAGCCAAGGAUGACUUGCCUG	AAGGCAAAUUACUAUUGGCUA	Translation		osa-miR818b	LOC_Os03g48010.1	0.5	2433	2454	AAUCCCUUAUAUUAUGGGACGG	CCGUUCCAUAAUAUAAGGGAUU	Cleavage	cDNA|exostosin, putative, expressed
osa-miR169l	XLOC_014043	5	723	743	UAGCCAAGGAUGACUUGCCUG	AAGGCAAAUUACUAUUGGCUA	Translation		osa-miR818b	LOC_Os12g16350.13	0.5	3286	3307	AAUCCCUUAUAUUAUGGGACGG	CCGUCCCAUAAUAUAGGGGAUU	Cleavage	cDNA|enoyl-CoA hydratase/isomerase family protein, putative, expressed
osa-miR169m	XLOC_014043	5	723	743	UAGCCAAGGAUGACUUGCCUG	AAGGCAAAUUACUAUUGGCUA	Translation		osa-miR818b	LOC_Os05g45580.1	0.5	2009	2030	AAUCCCUUAUAUUAUGGGACGG	UUGUCUCAUAAUAUAAGGGAUU	Cleavage	cDNA|expressed protein
osa-miR169q	XLOC_050893	5	2919	2939	UAGCCAAGGAGACUGCCCAUG	UUUGGCUAGUCUCCCAGGCUG	Cleavage		osa-miR818b	LOC_Os08g29760.1	0.5	1905	1926	AAUCCCUUAUAUUAUGGGACGG	CCAUCCUAUAAUAUAAGGGAUU	Cleavage	cDNA|membrane protein, putative, expressed
osa-miR171c-5p	XLOC_034986	5	1821	1841	GGAUAUUGGUGCGGUUCAAUC	GGUUGAGCUGCAUCGGUUUCA	Cleavage		osa-miR818c	LOC_Os09g24520.1	0.5	2226	2247	AAUCCCUUAUAUUAUGGGACGG	CCGUCUCAUAAUAUAAGGGAUU	Cleavage	cDNA|pentatricopeptide, putative, expressed
osa-miR171e-5p	XLOC_030063	5	240	260	UGUUGGCUCGGCUCACUCAGA	GGAGAUUGAGCUGAGUUAGUG	Cleavage		osa-miR818c	LOC_Os09g24520.2	0.5	2418	2439	AAUCCCUUAUAUUAUGGGACGG	CCGUCUCAUAAUAUAAGGGAUU	Cleavage	cDNA|pentatricopeptide, putative, expressed
osa-miR171f-5p	XLOC_024018	5	566	586	UGUUGGCAUGGUUCAAUCAAA	GUGGAUUGAAUUAAGUUAAUA	Cleavage		osa-miR818c	LOC_Os03g48010.1	0.5	2433	2454	AAUCCCUUAUAUUAUGGGACGG	CCGUUCCAUAAUAUAAGGGAUU	Cleavage	cDNA|exostosin, putative, expressed
osa-miR1846a-3p	XLOC_054216	5	837	857	UGACCCCGUUCUCCUCGCCGG	GCGGCGGCGACGACGAGGUCA	Translation		osa-miR818c	LOC_Os12g16350.13	0.5	3286	3307	AAUCCCUUAUAUUAUGGGACGG	CCGUCCCAUAAUAUAGGGGAUU	Cleavage	cDNA|enoyl-CoA hydratase/isomerase family protein, putative, expressed
osa-miR1846b-3p	XLOC_054216	5	837	857	UGACCCCGUUCUCCUCGCCGG	GCGGCGGCGACGACGAGGUCA	Translation		osa-miR818c	LOC_Os05g45580.1	0.5	2009	2030	AAUCCCUUAUAUUAUGGGACGG	UUGUCUCAUAAUAUAAGGGAUU	Cleavage	cDNA|expressed protein
osa-miR1846d-3p	XLOC_054212	5	486	505	UAUCCGGCGCCGCAGGGAGG	CCUCCCAUUGGCGCCGGCUG	Cleavage		osa-miR818c	LOC_Os08g29760.1	0.5	1905	1926	AAUCCCUUAUAUUAUGGGACGG	CCAUCCUAUAAUAUAAGGGAUU	Cleavage	cDNA|membrane protein, putative, expressed
osa-miR1846e	XLOC_051299	5	874	893	CAACGAGGAGGCCGGGACCA	UGGUAAUGGUCUCCUUUUUG	Cleavage		osa-miR818d	LOC_Os09g24520.1	0.5	2226	2247	AAUCCCUUAUAUUAUGGGACGG	CCGUCUCAUAAUAUAAGGGAUU	Cleavage	cDNA|pentatricopeptide, putative, expressed
osa-miR1849	XLOC_000467	5	1165	1185	UAUCGUAUCCUAGGUUGGUUU	AAAAUAACUUAUGAUACGAAA	Translation		osa-miR818d	LOC_Os09g24520.2	0.5	2418	2439	AAUCCCUUAUAUUAUGGGACGG	CCGUCUCAUAAUAUAAGGGAUU	Cleavage	cDNA|pentatricopeptide, putative, expressed
osa-miR1850.1	XLOC_049851	5	168	188	UGGAAAGUUGGGAGAUUGGGG	UCCUGGUUUGUCAAUUUUUCA	Cleavage		osa-miR818d	LOC_Os03g48010.1	0.5	2433	2454	AAUCCCUUAUAUUAUGGGACGG	CCGUUCCAUAAUAUAAGGGAUU	Cleavage	cDNA|exostosin, putative, expressed
osa-miR1851	XLOC_030606	5	79	99	CGUCUGGGAUGGCAUUUUGGC	UCCAAAGUGUCAUUUCACAUU	Cleavage		osa-miR818d	LOC_Os12g16350.13	0.5	3286	3307	AAUCCCUUAUAUUAUGGGACGG	CCGUCCCAUAAUAUAGGGGAUU	Cleavage	cDNA|enoyl-CoA hydratase/isomerase family protein, putative, expressed
osa-miR1853-3p	XLOC_037804	5	1518	1539	UAAUUGGGGAUGUUCGGUUGCU	AGUCCCCGAGCAAUCCCAAUUG	Translation		osa-miR818d	LOC_Os05g45580.1	0.5	2009	2030	AAUCCCUUAUAUUAUGGGACGG	UUGUCUCAUAAUAUAAGGGAUU	Cleavage	cDNA|expressed protein
osa-miR1854-3p	XLOC_030132	5	555	576	UCCAAUUUGGGGAUUUGCUGAU	UUCGGCAAAACUCCAAAUUGAC	Cleavage		osa-miR818d	LOC_Os08g29760.1	0.5	1905	1926	AAUCCCUUAUAUUAUGGGACGG	CCAUCCUAUAAUAUAAGGGAUU	Cleavage	cDNA|membrane protein, putative, expressed
osa-miR1855	XLOC_010368	5	51	71	AGCACUGGAGUAGCCAAGAGA	CGUCAUCGCUACUUAAGUGCC	Cleavage		osa-miR818e	LOC_Os09g24520.1	0.5	2226	2247	AAUCCCUUAUAUUAUGGGACGG	CCGUCUCAUAAUAUAAGGGAUU	Cleavage	cDNA|pentatricopeptide, putative, expressed
osa-miR1856	XLOC_005930	5	131	151	UAUGCGUAAGACGGAUUCGUA	GGCGAAUCCAUUUUACCCGUU	Cleavage		osa-miR818e	LOC_Os09g24520.2	0.5	2418	2439	AAUCCCUUAUAUUAUGGGACGG	CCGUCUCAUAAUAUAAGGGAUU	Cleavage	cDNA|pentatricopeptide, putative, expressed
osa-miR1857-5p	XLOC_030190	5	390	410	UGGUUUUUUUGGAGCAUGAGG	UGUUGCGCUCCAAGAAAGUGA	Cleavage		osa-miR818e	LOC_Os03g48010.1	0.5	2433	2454	AAUCCCUUAUAUUAUGGGACGG	CCGUUCCAUAAUAUAAGGGAUU	Cleavage	cDNA|exostosin, putative, expressed
osa-miR1861c	XLOC_034986	5	1804	1825	CGAUCUUGUAGCAAGAACUGAG	ACGAGUUCUUGCUUUCGGGUUG	Cleavage		osa-miR818e	LOC_Os12g16350.13	0.5	3286	3307	AAUCCCUUAUAUUAUGGGACGG	CCGUCCCAUAAUAUAGGGGAUU	Cleavage	cDNA|enoyl-CoA hydratase/isomerase family protein, putative, expressed
osa-miR1861h	XLOC_034986	5	1804	1825	CGGUCUUGAGGCAGGAACUGAG	ACGAGUUCUUGCUUUCGGGUUG	Cleavage		osa-miR818e	LOC_Os05g45580.1	0.5	2009	2030	AAUCCCUUAUAUUAUGGGACGG	UUGUCUCAUAAUAUAAGGGAUU	Cleavage	cDNA|expressed protein
osa-miR1861j	XLOC_034986	5	1804	1825	CGGUCUUGAGGCAGGAACUGAG	ACGAGUUCUUGCUUUCGGGUUG	Cleavage		osa-miR818e	LOC_Os08g29760.1	0.5	1905	1926	AAUCCCUUAUAUUAUGGGACGG	CCAUCCUAUAAUAUAAGGGAUU	Cleavage	cDNA|membrane protein, putative, expressed
osa-miR1862f	XLOC_000467	5	1289	1308	AUGAGGUUGGUUUAUUUUGG	CCAACAUGGGCCAAAUUUAU	Cleavage		osa-miR1427	LOC_Os06g49340.1	1	294	314	UGCGGAACCGUGCGGUGGCGC	CCGCCACCGCACGGUUUCGCG	Cleavage	cDNA|OsFBDUF35 - F-box and DUF domain containing protein, expressed
osa-miR1862g	XLOC_000467	5	1289	1308	AUGAGGUUGGUUUAUUUUGG	CCAACAUGGGCCAAAUUUAU	Cleavage		osa-miR1436	LOC_Os09g22505.1	1	918	938	ACAUUAUGGGACGGAGGGAGU	ACUCCUUCCGUUCCAUAAUGU	Cleavage	cDNA|expressed protein
osa-miR1863b	XLOC_000467	5	1088	1111	AGCUCUGAUACCAUGUUAACUGUU	UAAAACUAAUUUGGUGUUAGAGAU	Cleavage		osa-miR1436	LOC_Os01g64100.1	1	1076	1096	ACAUUAUGGGACGGAGGGAGU	ACUUCCUCCGUUCCAUAAUGU	Cleavage	cDNA|glycosyl hydrolase, putative, expressed
osa-miR1864	XLOC_043574	5	5097	5120	UUGUAGUAACGUGAUGGUCAAUGU	CGACAAACUAUCACGGUAUUAUGG	Cleavage		osa-miR1436	LOC_Os11g31450.1	1	1922	1942	ACAUUAUGGGACGGAGGGAGU	ACUCCCUCCGUUUCAUAAUGU	Cleavage	cDNA|expressed protein
osa-miR1865-5p	XLOC_010368	5	215	238	UGCUAGUGAUGGUGAUUCUUCGAC	AUGGCAGCUUCGUCGUCGCUAGCC	Cleavage		osa-miR1438	LOC_Os11g04030.4	1	915	936	AGGGUAAUUUUAUCAUUUUUAA	UCAAGGAUGAUAAAAUUACCCU	Cleavage	cDNA|major facilitator superfamily antiporter, putative, expressed
osa-miR1872	XLOC_000467	5	644	667	GAACUGUAAGUCUGUGACGGGUAA	AGUGUCGUGACAGAAUUCCAGUUG	Translation		osa-miR156a	LOC_Os11g30370.1	1	1091	1110	UGACAGAAGAGAGUGAGCAC	GUGCUCUCUCUCUUCUGUCA	Cleavage	cDNA|OsSPL19 - SBP-box gene family member, expressed
osa-miR1876	XLOC_048354	5	1337	1359	AUAAGUGGGUUUGUGGGCUGGCCC	AUACUAGCC-ACAUAUCCACUUAA	Translation		osa-miR156a	LOC_Os09g32944.1	1	1034	1053	UGACAGAAGAGAGUGAGCAC	GUGCUCUCUCUCUUCUGUCA	Cleavage	cDNA|OsSPL18 - SBP-box gene family member, expressed
osa-miR1882e-3p	XLOC_048525	5	1754	1776	GAAAUGAUCUUGGACGUAAUCUAG	AAAGAU-ACAUUUGAGAUCAUUUU	Cleavage		osa-miR156a	LOC_Os09g31438.1	1	809	828	UGACAGAAGAGAGUGAGCAC	GUGCUCUCUCUCUUCUGUCA	Cleavage	cDNA|OsSPL17 - SBP-box gene family member, expressed
osa-miR2055	XLOC_050893	5	2747	2767	UUUCCUUGGGAAGGUGGUUUC	AAAAUCACUUUCUAAAAGGAA	Cleavage		osa-miR156a	LOC_Os06g45310.1	1	854	873	UGACAGAAGAGAGUGAGCAC	GUGCUCUCUCUCUUCUGUCA	Cleavage	cDNA|OsSPL11 - SBP-box gene family member, expressed
osa-miR2093-3p	XLOC_030606	5	538	559	ACAUCUUCCAAUUA--AUGCAU	UUGCAUGAUAAUUCGAAGAUGC	Cleavage		osa-miR156a	LOC_Os04g46580.1	1	818	837	UGACAGAAGAGAGUGAGCAC	GUGCUCUCUCUCUUCUGUCA	Cleavage	cDNA|OsSPL7 - SBP-box gene family member, expressed
osa-miR2093-5p	XLOC_045515	5	969	988	GUGCAUUAAUUGGAAGAACA	UAUAUUUCCACUUGAUGUAC	Translation		osa-miR156a	LOC_Os02g07780.1	1	987	1006	UGACAGAAGAGAGUGAGCAC	GUGCUCUCUCUCUUCUGUCA	Cleavage	cDNA|OsSPL4 - SBP-box gene family member, expressed
osa-miR2095-5p	XLOC_000467	5	736	757	CUGAUAAUUUUACGAUGAAUAG	GAAUUUGUGGAGAGAUUGUCAG	Cleavage		osa-miR156a	LOC_Os08g41940.1	1	1054	1073	UGACAGAAGAGAGUGAGCAC	GUGCUCUCUCUCUUCUGUCA	Cleavage	cDNA|OsSPL16 - SBP-box gene family member, expressed
osa-miR2097-5p	XLOC_045627	5	140	161	AGAGAUGGGACGGGCAGGGAAG	CUACCCCUUCCGUCCCAACUCC	Cleavage		osa-miR156a	LOC_Os08g39890.1	1	992	1011	UGACAGAAGAGAGUGAGCAC	GUGCUCUCUCUCUUCUGUCA	Cleavage	cDNA|OsSPL14 - SBP-box gene family member, expressed
osa-miR2101-3p	XLOC_043574	5	4037	4058	AUUUAACUCAAGUGAGCAUUGU	UUGAUGAUUAUUUCAGUUGAAA	Cleavage		osa-miR156a	LOC_Os01g69830.1	1	1153	1172	UGACAGAAGAGAGUGAGCAC	GUGCUCUCUCUCUUCUGUCA	Cleavage	cDNA|OsSPL2 - SBP-box gene family member, expressed
[truncated: 1,894 more rows]
