# Supplementary material for: Pokkali: A Naturally Evolved Salt-Tolerant Rice Shows a Distinguished Set of lncRNAs Possibly Contributing to the Tolerant Phenotype
Source: Int J Mol Sci. 2023 Jul 20;24(14):11677. doi: 10.3390/ijms241411677 (PMC10380863; doi:10.3390/ijms241411677)
Supplement: Supplementary file 1 [file ijms-24-11677-s001.zip › Table S6.xlsx]

## Sheet: IR64
Table S6: Gene ontology enrichment analysis. The different background color is to differentiate Biological, Cellular and Molecular categories.
category	term	number_of_genes	number_of_genes_in_background	p_value	description
Biological Process	GO:0048653	9	49	4.97e-12	Anther development
Biological Process	GO:0009698	10	175	1.23e-08	Phenylpropanoid metabolic process
Biological Process	GO:0065009	28	1922	4.18e-08	Regulation of molecular function
Biological Process	GO:0009908	11	263	4.85e-08	Flower development
Biological Process	GO:0048608	16	649	5.69e-08	Reproductive structure development
Biological Process	GO:0006355	28	2047	1.51e-07	Regulation of transcription, dna-templated
Biological Process	GO:0009791	16	778	6.11e-07	Post-embryonic development
Biological Process	GO:0048731	18	1135	4.43e-06	System development
Biological Process	GO:0046274	4	28	1.25e-05	Lignin catabolic process
Biological Process	GO:0048856	24	2000	1.18e-05	Anatomical structure development
Biological Process	GO:0007275	22	1756	1.49e-05	Multicellular organism development
Biological Process	GO:0051171	30	2959	2.19e-05	Regulation of nitrogen compound metabolic process
Biological Process	GO:0006826	5	71	2.39e-05	Iron ion transport
Biological Process	GO:0031323	31	3169	3.09e-05	Regulation of cellular metabolic process
Biological Process	GO:0032501	23	2005	3.67e-05	Multicellular organismal process
Biological Process	GO:0065007	49	6242	3.68e-05	Biological regulation
Biological Process	GO:0080090	30	3052	3.89e-05	Regulation of primary metabolic process
Biological Process	GO:0055072	5	81	4.34e-05	Iron ion homeostasis
Biological Process	GO:0009808	5	91	7.35e-05	Lignin metabolic process
Biological Process	GO:0099402	10	507	0.00012	Plant organ development
Biological Process	GO:0060255	30	3261	0.00013	Regulation of macromolecule metabolic process
Biological Process	GO:0080050	3	20	0.00014	Regulation of seed development
Biological Process	GO:0009308	5	111	0.00018	Amine metabolic process
Biological Process	GO:0050793	10	535	0.00018	Regulation of developmental process
Biological Process	GO:0009909	5	116	0.00022	Regulation of flower development
Biological Process	GO:0050794	39	4910	0.00024	Regulation of cellular process
Biological Process	GO:0006725	29	3258	0.00029	Cellular aromatic compound metabolic process
Cellular Component	GO:0110165	130	20367	9.24e-11	Cellular anatomical entity
Cellular Component	GO:0042025	10	178	1.43e-08	Host cell nucleus
Cellular Component	GO:0005667	8	115	8.84e-08	Transcription regulator complex
Cellular Component	GO:0090575	7	81	1.45e-07	RNA polymerase II transcription regulator complex
Cellular Component	GO:0005634	52	5833	4.2e-07	Nucleus
Cellular Component	GO:0016602	4	11	5.03e-07	CCAAT-binding factor complex
Cellular Component	GO:0043229	85	12290	1.05e-06	Intracellular organelle
Cellular Component	GO:0043231	79	11294	2.51e-06	Intracellular membrane-bounded organelle
Cellular Component	GO:0043227	81	11916	5.49e-06	Membrane-bounded organelle
Cellular Component	GO:0048046	9	307	1.35e-05	Apoplast
Cellular Component	GO:0005622	93	14883	2.23e-05	Intracellular
Cellular Component	GO:0031012	3	20	0.00014	Extracellular matrix
Cellular Component	GO:0005669	3	26	0.00029	Transcription factor tfiid complex
Molecular function	GO:0003676	43	3652	2.81e-09	Nucleic acid binding
Molecular function	GO:0003677	33	2250	1.73e-09	DNA binding
Molecular function	GO:0005488	96	13083	1.99e-09	Binding
Molecular function	GO:0016207	4	5	4.74e-08	4-coumarate-CoA ligase activity
Molecular function	GO:0097159	65	7876	1.16e-07	Organic cyclic compound binding
Molecular function	GO:1901363	65	7857	1.06e-07	Heterocyclic compound binding
Molecular function	GO:0000977	9	175	1.58e-07	RNA polymerase II transcription regulatory region sequence-specific DNA binding
Molecular function	GO:0000978	7	98	4.89e-07	RNA polymerase II cis-regulatory region sequence-specific DNA binding
Molecular function	GO:0000976	11	349	7.39e-07	Transcription regulatory region sequence-specific dna binding
Molecular function	GO:0003700	17	1057	6.94e-06	DNA-binding transcription factor activity
Molecular function	GO:0043565	14	735	7.49e-06	Sequence-specific dna binding
Molecular function	GO:0140110	18	1179	7.39e-06	Transcription regulator activity
Molecular function	GO:0052716	4	28	1.25e-05	Hydroquinone:oxygen oxidoreductase activity
Molecular function	GO:0004322	4	41	4.95e-05	Ferroxidase activity
Molecular function	GO:0098772	20	1736	0.00012	Molecular function regulator

## Sheet: Pokkali
category	term	number_of_genes	number_of_genes_in_background	p_value	description
Biological process	GO:0006355	39	2047	2.61e-14	Regulation of transcription, dna-templated
Biological process	GO:2000112	41	2410	1.93e-13	Regulation of cellular macromolecule biosynthetic process
Biological process	GO:0010468	41	2724	9.19e-12	Regulation of gene expression
Biological process	GO:0065009	33	1922	5.51e-11	Regulation of molecular function
Biological process	GO:0051171	41	2959	1.15e-10	Regulation of nitrogen compound metabolic process
Biological process	GO:0031323	42	3169	2.48e-10	Regulation of cellular metabolic process
Biological process	GO:0080090	41	3052	2.9e-10	Regulation of primary metabolic process
Biological process	GO:0048653	7	49	6.81e-09	Anther development
Biological process	GO:0065007	59	6242	1.08e-08	Biological regulation
Biological process	GO:0009698	10	175	1.47e-08	Phenylpropanoid metabolic process
Biological process	GO:0019748	11	269	7.31e-08	Secondary metabolic process
Biological process	GO:0050794	48	4910	1.74e-07	Regulation of cellular process
Biological process	GO:0050789	51	5537	3.95e-07	Regulation of biological process
Biological process	GO:0042401	5	36	1.2e-06	Cellular biogenic amine biosynthetic process
Biological process	GO:0032502	27	2129	1.61e-06	Developmental process
Biological process	GO:0009908	9	263	4.73e-06	Flower development
Biological process	GO:0046274	4	28	1.34e-05	Lignin catabolic process
Biological process	GO:0009308	6	111	1.67e-05	Amine metabolic process
Biological process	GO:0048856	24	2000	1.62e-05	Anatomical structure development
Biological process	GO:0048367	11	484	1.82e-05	Shoot system development
Biological process	GO:0048580	8	248	2.43e-05	Regulation of post-embryonic development
Biological process	GO:0006826	5	71	2.61e-05	Iron ion transport
Biological process	GO:0000041	6	128	3.59e-05	Transition metal ion transport
Biological process	GO:0055072	5	81	4.74e-05	Iron ion homeostasis
Biological process	GO:0032501	23	2005	4.93e-05	Multicellular organismal process
Biological process	GO:0048608	12	649	5.43e-05	Reproductive structure development
Biological process	GO:0007275	21	1756	6.06e-05	Multicellular organism development
Biological process	GO:0003006	13	768	6.4e-05	Developmental process involved in reproduction
Biological process	GO:0030001	9	369	6.32e-05	Metal ion transport
Biological process	GO:2000241	7	216	7.7e-05	Regulation of reproductive process
Biological process	GO:0009808	5	91	8.02e-05	Lignin metabolic process
Biological process	GO:0000162	3	16	8.49e-05	Tryptophan biosynthetic process
Biological process	GO:0019438	14	904	8.46e-05	Aromatic compound biosynthetic process
Biological process	GO:0055065	6	167	0.00015	Metal ion homeostasis
Biological process	GO:0080050	3	20	0.00015	Regulation of seed development
Biological process	GO:0048831	6	169	0.00016	Regulation of shoot system development
Biological process	GO:0006725	30	3258	0.00018	Cellular aromatic compound metabolic process
Biological process	GO:0050793	10	535	0.00021	Regulation of developmental process
Biological process	GO:0009909	5	116	0.00024	Regulation of flower development
Biological process	GO:0018130	12	776	0.00028	Heterocycle biosynthetic process
Biological process	GO:0009791	12	778	0.00028	Post-embryonic development
Biological process	GO:0022414	14	1025	0.0003	Reproductive process
Biological process	GO:0097659	7	279	0.00035	Nucleic acid-templated transcription
Biological process	GO:1901362	14	1040	0.00035	Organic cyclic compound biosynthetic process
Biological process	GO:0044271	16	1356	0.00055	Cellular nitrogen compound biosynthetic process
Biological process	GO:0099402	9	507	0.00063	Plant organ development
Cellular component	GO:0110165	139	20367	1.09e-14	Cellular anatomical entity
Cellular component	GO:0042025	12	178	8.41e-11	Host cell nucleus
Cellular component	GO:0005634	58	5833	2.34e-09	Nucleus
Cellular component	GO:0043231	88	11294	3.43e-09	Intracellular membrane-bounded organelle
Cellular component	GO:0005622	105	14883	4.81e-09	Intracellular
Cellular component	GO:0043229	92	12290	8.56e-09	Intracellular organelle
Cellular component	GO:0043227	90	11916	9.75e-09	Membrane-bounded organelle
Cellular component	GO:0043226	93	12679	1.94e-08	Organelle
Cellular component	GO:0005667	8	115	1.02e-07	Transcription regulator complex
Cellular component	GO:0090575	7	81	1.65e-07	RNA polymerase II transcription regulator complex
Cellular component	GO:0016602	4	11	5.42e-07	CCAAT-binding factor complex
Molecular function	GO:0003677	39	2250	4.89e-13	DNA binding
Molecular function	GO:0003676	46	3652	1.4e-10	Nucleic acid binding
Molecular function	GO:0005488	100	13083	1.61e-10	Binding
Molecular function	GO:0097159	73	7876	1.18e-10	Organic cyclic compound binding
Molecular function	GO:1901363	73	7857	1.05e-10	Heterocyclic compound binding
Molecular function	GO:0003700	23	1057	8.71e-10	DNA-binding transcription factor activity
Molecular function	GO:0000977	11	175	1.06e-09	RNA polymerase II transcription regulatory region sequence-specific DNA binding
Molecular function	GO:0043565	19	735	1.93e-09	Sequence-specific dna binding
Molecular function	GO:1990837	14	370	2.97e-09	Sequence-specific double-stranded dna binding
Molecular function	GO:0000976	13	349	1.33e-08	Transcription regulatory region sequence-specific dna binding
Molecular function	GO:0016207	4	5	5.11e-08	4-coumarate-CoA ligase activity
Molecular function	GO:0000978	7	98	5.54e-07	RNA polymerase II cis-regulatory region sequence-specific DNA binding
Molecular function	GO:0052716	4	28	1.34e-05	Hydroquinone:oxygen oxidoreductase activity
Molecular function	GO:0004322	4	41	5.32e-05	Ferroxidase activity
Molecular function	GO:0043167	57	7672	5.68e-05	Ion binding
Molecular function	GO:0016830	5	140	0.00055	Carbon-carbon lyase activity
