# Supplementary material for: Pokkali: A Naturally Evolved Salt-Tolerant Rice Shows a Distinguished Set of lncRNAs Possibly Contributing to the Tolerant Phenotype
Source: Int J Mol Sci. 2023 Jul 20;24(14):11677. doi: 10.3390/ijms241411677 (PMC10380863; doi:10.3390/ijms241411677)
Supplement: Supplementary file 1 [file ijms-24-11677-s001.zip › Table S7.xlsx]

## Sheet: IR64
Family	sequence name	start	stop	strand	matched sequence
ERF	XLOC_043772	138	158	-	TCCGCCGCCGCCACCGCCGCC
BBR-BPC	XLOC_020194	467	490	-	GAGAGAGAGAGAGAGGGAGAGAAA
ERF	XLOC_043772	137	157	-	CCGCCGCCGCCACCGCCGCCA
C2H2	XLOC_035128	66	84	+	CCTCTTCCTCCTCCTCCTC
ERF	XLOC_043772	140	158	+	CGGCGGTGGCGGCGGCGGA
ERF	XLOC_043772	138	158	+	GGCGGCGGTGGCGGCGGCGGA
ERF	XLOC_043772	140	159	-	CTCCGCCGCCGCCACCGCCG
BBR-BPC	XLOC_020194	465	488	-	GAGAGAGAGAGAGGGAGAGAAAAG
ERF	XLOC_043772	137	156	-	CGCCGCCGCCACCGCCGCCA
ERF	XLOC_043772	140	160	-	GCTCCGCCGCCGCCACCGCCG
ERF	XLOC_043772	107	127	-	CCGGCGCCGCCGCCGCCGCCG
Dof	XLOC_048354	398	418	-	TTTTCTTTTTCTCTTCTTTTT
ERF	XLOC_043772	141	161	-	TGCTCCGCCGCCGCCACCGCC
BBR-BPC	XLOC_020194	469	492	-	CCGAGAGAGAGAGAGAGGGAGAGA
C2H2	XLOC_048354	361	379	-	CTTCCTCCTCCTCTTCTTC
Dof	XLOC_048525	3008	3028	-	CAAGAAAAGAAAAAGTTAAAA
BBR-BPC	XLOC_035632	145	168	+	TGGAGAGAGAGAGAGAGAGGAAGG
ERF	XLOC_043772	108	128	-	GCCGGCGCCGCCGCCGCCGCC
ERF	XLOC_014436	408	427	-	GGCGGTGGCGTTGGTGGCGG
ERF	XLOC_043772	137	157	+	TGGCGGCGGTGGCGGCGGCGG
ERF	XLOC_043772	104	124	-	GCGCCGCCGCCGCCGCCGCGG
ERF	XLOC_014436	1224	1244	+	GCCGCCGCCGCCTCAACCGAC
ERF	XLOC_014436	1222	1242	+	CTGCCGCCGCCGCCTCAACCG
BBR-BPC	XLOC_035632	147	170	+	GAGAGAGAGAGAGAGAGGAAGGTG
ERF	XLOC_043772	138	157	+	GGCGGCGGTGGCGGCGGCGG
C2H2	XLOC_035128	63	81	+	CGTCCTCTTCCTCCTCCTC
Dof	XLOC_043574	398	418	-	TTTTCTTTTTCTCTTCTTCTT
ERF	XLOC_043772	106	120	-	CGCCGCCGCCGCCGC
ERF	XLOC_043772	109	123	-	CGCCGCCGCCGCCGC
LBD	XLOC_043772	137	157	-	CCGCCGCCGCCACCGCCGCCA
HD-ZIP	XLOC_034986	570	590	+	AAATCAATAATTGAATATATT
C2H2	XLOC_035128	60	78	+	CCTCGTCCTCTTCCTCCTC
Dof	XLOC_036674	1576	1596	-	TTTGCTTTTACATTTTTTTTT
Dof	XLOC_012049	5	25	+	GAAAAAGAAAAAGAAAAAGGA
BBR-BPC	XLOC_020194	463	486	-	GAGAGAGAGAGGGAGAGAAAAGGG
LBD	XLOC_043772	140	160	-	GCTCCGCCGCCGCCACCGCCG
C2H2	XLOC_035128	69	87	+	CTTCCTCCTCCTCCTCCTG
ERF	XLOC_043772	107	121	-	CCGCCGCCGCCGCCG
ERF	XLOC_043772	107	121	-	CCGCCGCCGCCGCCG
ERF	XLOC_043772	107	121	-	CCGCCGCCGCCGCCG
Dof	XLOC_048354	397	417	+	AAAAAAGAAGAGAAAAAGAAA
ERF	XLOC_043772	107	126	-	CGGCGCCGCCGCCGCCGCCG
C2H2	XLOC_048354	364	382	-	CATCTTCCTCCTCCTCTTC
ERF	XLOC_014436	408	427	+	CCGCCACCAACGCCACCGCC
Dof	XLOC_020194	548	568	+	AGAAAAGAAAAATAAAAGAAA
ERF	XLOC_020194	289	303	+	CCACCGCCGCCGCCT
ERF	XLOC_020194	289	303	+	CCACCGCCGCCGCCT
ERF	XLOC_043772	107	121	-	CCGCCGCCGCCGCCG
Dof	XLOC_050893	389	409	-	CTTTCTTTTTCTTTTCTTCTT
ERF	XLOC_043772	141	160	+	GGCGGTGGCGGCGGCGGAGC
ERF	XLOC_043772	143	161	+	CGGTGGCGGCGGCGGAGCA
ERF	XLOC_000467	500	514	+	GGAGGTGGCGGTGGA
ERF	XLOC_043772	140	160	+	CGGCGGTGGCGGCGGCGGAGC
BBR-BPC	XLOC_048525	61	84	-	GACATGGAGAGAGAAAGAGAGAGC
Dof	XLOC_001451	557	577	-	TTTTCTTTTATTTTTCTTTCT
LBD	XLOC_043772	110	130	-	TCGCCGGCGCCGCCGCCGCCG
Dof	XLOC_048525	3007	3020	-	GAAAAAGTTAAAAA
C3H	XLOC_048525	3010	3023	-	AAAGAAAAAGTTAA
ERF	XLOC_014436	407	427	-	GGCGGTGGCGTTGGTGGCGGG
ERF	XLOC_014436	409	428	+	CGCCACCAACGCCACCGCCG
ERF	XLOC_020194	289	303	+	CCACCGCCGCCGCCT
ERF	XLOC_043772	137	151	-	CCGCCACCGCCGCCA
ERF	XLOC_043772	108	127	+	GGCGGCGGCGGCGGCGCCGG
ERF	XLOC_002582	576	595	-	CCCCGACGCCGCCGCCGCCG
Dof	XLOC_012049	3	23	+	GAGAAAAAGAAAAAGAAAAAG
ERF	XLOC_043772	141	161	+	GGCGGTGGCGGCGGCGGAGCA
C2H2	XLOC_048354	367	385	-	CGTCATCTTCCTCCTCCTC
ERF	XLOC_014436	200	219	-	GGCGGCGGTGACGATGGTGG
ERF	XLOC_014436	1224	1242	-	CGGTTGAGGCGGCGGCGGC
ERF	XLOC_043772	105	125	-	GGCGCCGCCGCCGCCGCCGCG
ERF	XLOC_020194	289	303	+	CCACCGCCGCCGCCT
ERF	XLOC_043772	107	121	+	CGGCGGCGGCGGCGG
ERF	XLOC_001451	316	330	-	GGAGGTGGCGGTGGT
Dof	XLOC_050893	383	403	-	TTTTCTTTTCTTCTTCTTCTT
ERF	XLOC_014436	412	431	+	CACCAACGCCACCGCCGTCG
ERF	XLOC_020194	288	302	-	GGCGGCGGCGGTGGC
ERF	XLOC_020194	289	303	+	CCACCGCCGCCGCCT
ERF	XLOC_001049	222	241	-	AGCCGCCGCCTTCACCGTCA
Dof	XLOC_034986	400	420	-	TTTTCTTTTCTCTCTCTTTTT
Dof	XLOC_048525	3006	3026	-	AGAAAAGAAAAAGTTAAAAAA
Dof	XLOC_012049	1	21	-	TTTTCTTTTTCTTTTTCTCCT
ERF	XLOC_020194	289	303	-	AGGCGGCGGCGGTGG
Dof	XLOC_048354	404	424	-	CTTTCTTTTTCTTTTTCTCTT
Trihelix	XLOC_030042	92	107	-	ACGGTAAAAAATTTAT
MIKC_MADS	XLOC_020026	252	265	-	CCAAAAGAGGAAAG
MIKC_MADS	XLOC_020026	252	265	-	CCAAAAGAGGAAAG
Dof	XLOC_006722	36	56	+	ATAAAAGAAAAGGAAAAAAAA
ERF	XLOC_043772	131	151	-
bZIP	XLOC_043574	3783	3797	+	ACTGATGACGTGGCA
ERF	XLOC_047008	512	531	+	GTCGGCGGCGACGGCGGCCG
ERF	XLOC_043772	145	159	-	CTCCGCCGCCGCCAC
ERF	XLOC_020194	292	312	-	CGGTAAAAGAGGCGGCGGCGG
ERF	XLOC_000467	500	514	+	GGAGGTGGCGGTGGA
ERF	XLOC_000467	500	514	+	GGAGGTGGCGGTGGA
BBR-BPC	XLOC_035632	149	172	+	GAGAGAGAGAGAGAGGAAGGTGGT
Dof	XLOC_048354	400	420	+	AAAGAAGAGAAAAAGAAAAAG
BBR-BPC	XLOC_001451	548	571	+	AAGAAAGAGAGAAAGAAAAATAAA
ERF	XLOC_043772	107	121	-	CCGCCGCCGCCGCCG
Dof	XLOC_048354	3891	3911	+	AGAAAAGAAAAAATAAAGAGG
ERF	XLOC_043772	519	539	+	CCTCCGCCGTCGTCGCATCCC
Dof	XLOC_035558	334	354	+	AAAAAAGAAAGAACAAAGAAA
Dof	XLOC_043574	403	423	-	TTTTCTTTTCTTTTTCTCTTC
ERF	XLOC_043772	107	127	+	CGGCGGCGGCGGCGGCGCCGG
WRKY	XLOC_054197	182	196	-	ACCGTTGACTTTTTA
LBD	XLOC_043772	113	133	-	CCGTCGCCGGCGCCGCCGCCG
BBR-BPC	XLOC_034986	14	37	-	GGGAGAGAGAGAGAAGAGGAGAGC
BBR-BPC	XLOC_045515	649	672	+	TATATATAGAGAGAGAGAGAAATA
ERF	XLOC_053362	5310	5324	-	CGTCGCCGCCGCCGC
Dof	XLOC_012049	7	27	-	ATTCCTTTTTCTTTTTCTTTT
WRKY	XLOC_054197	184	196	-	ACCGTTGACTTTT
ERF	XLOC_014436	411	430	-	GACGGCGGTGGCGTTGGTGG
WRKY	XLOC_054197	12	26	+	GCCGTTGACTTTTTA
C2H2	XLOC_020194	521	539	-	CCTCCTCTACTTCTTCCTC
ERF	XLOC_043772	141	160	-	GCTCCGCCGCCGCCACCGCC
WRKY	XLOC_054197	183	196	-	ACCGTTGACTTTTT
BBR-BPC	XLOC_050893	9	32	-	GGGAGAGAAAGAGAGAGATGAAGC
ERF	XLOC_020194	288	302	-	GGCGGCGGCGGTGGC
ERF	XLOC_020194	288	302	-	GGCGGCGGCGGTGGC
ERF	XLOC_043772	107	125	+	CGGCGGCGGCGGCGGCGCC
BBR-BPC	XLOC_034986	397	420	+	AAGAAAAAGAGAGAGAAAAGAAAA
ERF	XLOC_043772	136	150	-	CGCCACCGCCGCCAT
ERF	XLOC_014436	199	219	-	GGCGGCGGTGACGATGGTGGG
ERF	XLOC_043772	137	151	-	CCGCCACCGCCGCCA
LBD	XLOC_043772	107	127	-	CCGGCGCCGCCGCCGCCGCCG
Dof	XLOC_035287	80	100	+	CAAAAAGGAGAAAGAGAAAAG
BBR-BPC	XLOC_034986	12	35	-	GAGAGAGAGAGAAGAGGAGAGCTC
ERF	XLOC_014436	1222	1242	-	CGGTTGAGGCGGCGGCGGCAG
BBR-BPC	XLOC_035632	143	166	+	ACTGGAGAGAGAGAGAGAGAGGAA
BBR-BPC	XLOC_050893	389	412	+	AAGAAGAAAAGAAAAAGAAAGAGA
ERF	XLOC_043772	137	151	-	CCGCCACCGCCGCCA
ERF	XLOC_043772	137	151	-	CCGCCACCGCCGCCA
ERF	XLOC_047008	514	533	-	CGCGGCCGCCGTCGCCGCCG
WRKY	XLOC_054197	13	26	+	CCGTTGACTTTTTA
WRKY	XLOC_054197	182	195	-	CCGTTGACTTTTTA
ERF	XLOC_000467	494	514	+	GCTGCTGGAGGTGGCGGTGGA
ERF	XLOC_020194	287	301	+	AGCCACCGCCGCCGC
Dof	XLOC_050893	393	413	+	AGAAAAGAAAAAGAAAGAGAA
ERF	XLOC_043772	113	127	-	CCGGCGCCGCCGCCG
ERF	XLOC_043772	113	127	-	CCGGCGCCGCCGCCG
ERF	XLOC_043772	110	129	-	CGCCGGCGCCGCCGCCGCCG
WRKY	XLOC_054197	12	24	-	AAAAGTCAACGGC
ERF	XLOC_000467	499	517	+
BBR-BPC	XLOC_020194	139	162	-	GGGGAAGAGAGAGAAAGATAGAGC
C2H2	XLOC_031311	116	134	+	CTGCCTCCACCTCCTCTTC
TALE	XLOC_020194	474	493	+	CCCTCTCTCTCTCTCTCGGC
TALE	XLOC_035632	146	165	-	TCCTCTCTCTCTCTCTCTCC
Dof	XLOC_048354	3881	3901	-	TTTTCTTTTCTTCATTATTTT
ERF	XLOC_043772	141	155	+	GGCGGTGGCGGCGGC
BBR-BPC	XLOC_048354	406	429	+	GAGAAAAAGAAAAAGAAAGACTGA
MYB	XLOC_043574	3642	3656	-	CGTTTATGACGGTTA
C2H2	XLOC_035128	57	75	+	CTTCCTCGTCCTCTTCCTC
ERF	XLOC_043772	140	154	-	CCGCCGCCACCGCCG
C3H	XLOC_048525	4007	4020	-	AAGCAAAAAGGTAA
ERF	XLOC_043772	111	130	+	GGCGGCGGCGGCGCCGGCGA
ERF	XLOC_035128	209	228	+	GGCGGCGGAGGAGCGGGTGG
ERF	XLOC_029970	166	185	+	CGCCTCCATCGTCGCCGTCG
ERF	XLOC_043772	128	148	-	CCACCGCCGCCATGGCCGTCG
ERF	XLOC_029970	172	191	+	CATCGTCGCCGTCGCCGTCG
ERF	XLOC_014436	410	430	-	GACGGCGGTGGCGTTGGTGGC
ERF	XLOC_043772	518	538	+	CCCTCCGCCGTCGTCGCATCC
ERF	XLOC_043772	143	163	-
WRKY	XLOC_054197	12	24	+	GCCGTTGACTTTT
Dof	XLOC_020194	549	569	-
WRKY	XLOC_054197	184	196	-	ACCGTTGACTTTT
ERF	XLOC_035128	116	136	+	TGCTGCTGTGGTGGTGGTGGA
ERF	XLOC_002582	576	590	-	ACGCCGCCGCCGCCG
ERF	XLOC_002582	576	590	-	ACGCCGCCGCCGCCG
ERF	XLOC_014436	1224	1244	-	GTCGGTTGAGGCGGCGGCGGC
ERF	XLOC_043772	143	157	-	CCGCCGCCGCCACCG
ERF	XLOC_043772	143	157	-	CCGCCGCCGCCACCG
ERF	XLOC_001451	316	330	-	GGAGGTGGCGGTGGT
ERF	XLOC_001451	316	330	-	GGAGGTGGCGGTGGT
MYB	XLOC_049815	121	141	+	AATGTTGAGGATAAAGATGAT
MYB	XLOC_053362	2344	2364	+	AATGTTGAGGATAAAGATGAT
MYB	XLOC_048525	2359	2379	+	AATGTTGAGGATAAAGATGAT
WRKY	XLOC_054197	12	25	+	GCCGTTGACTTTTT
BBR-BPC	XLOC_048525	63	86	-	CGGACATGGAGAGAGAAAGAGAGA
ERF	XLOC_020194	292	312	+	CCGCCGCCGCCTCTTTTACCG
ERF	XLOC_043772	104	122	+
ERF	XLOC_043772	144	158	+	GGTGGCGGCGGCGGA
ERF	XLOC_043772	144	158	+	GGTGGCGGCGGCGGA
ERF	XLOC_043772	250	264	-	GGCGGCGTCGGTGGC
ERF	XLOC_043772	113	132	-	CGTCGCCGGCGCCGCCGCCG
ERF	XLOC_043772	129	149	-	GCCACCGCCGCCATGGCCGTC
BBR-BPC	XLOC_045515	647	670	+	TATATATATAGAGAGAGAGAGAAA
ERF	XLOC_043772	102	122	-	GCCGCCGCCGCCGCCGCGGAA
Dof	XLOC_048525	3170	3190	+	TTTATTTTTTTATATTTTTAT
ERF	XLOC_014436	1225	1244	-	GTCGGTTGAGGCGGCGGCGG
ERF	XLOC_001451	313	331	-	GGGAGGTGGCGGTGGTGGC
Dof	XLOC_043574	400	420	+	GAAGAAGAGAAAAAGAAAAGA
TALE	XLOC_020194	470	489	+	CTCTCCCTCTCTCTCTCTCT
ERF	XLOC_043772	140	154	-	CCGCCGCCACCGCCG
ERF	XLOC_043772	140	154	-	CCGCCGCCACCGCCG
BBR-BPC	XLOC_048354	404	427	+	AAGAGAAAAAGAAAAAGAAAGACT
ERF	XLOC_043772	146	160	+	TGGCGGCGGCGGAGC
Dof	XLOC_043574	3438	3458	+	AAAAAAGGAGAAAGGAGAGAA
ERF	XLOC_014436	1222	1236	+	CTGCCGCCGCCGCCT
BBR-BPC	XLOC_012049	3	26	+	GAGAAAAAGAAAAAGAAAAAGGAA
BBR-BPC	XLOC_020194	533	556	+	GAGGAGGAGAGAGAAAGAAAAGAA
ERF	XLOC_043772	137	151	+	TGGCGGCGGTGGCGG
bZIP	XLOC_043574	3783	3797	-	TGCCACGTCATCAGT
ERF	XLOC_043772	146	160	-	GCTCCGCCGCCGCCA
BBR-BPC	XLOC_001451	542	565	+	AGGAAGAAGAAAGAGAGAAAGAAA
BBR-BPC	XLOC_001451	544	567	+	GAAGAAGAAAGAGAGAAAGAAAAA
WRKY	XLOC_054197	184	196	-	ACCGTTGACTTTT
bZIP	XLOC_043574	3783	3797	+	ACTGATGACGTGGCA
ERF	XLOC_014436	419	439	+	GCCACCGCCGTCGACGCCTAC
ERF	XLOC_020194	291	311	+	ACCGCCGCCGCCTCTTTTACC
WRKY	XLOC_054197	14	26	+	CGTTGACTTTTTA
WRKY	XLOC_054197	182	194	-	CGTTGACTTTTTA
C2H2	XLOC_043772	89	107	+	CTTCTTCCTCATCTTCCGC
ERF	XLOC_014436	1222	1236	+	CTGCCGCCGCCGCCT
CPP	XLOC_053362	628	640	-	AGAAATTTTAAAA
ERF	XLOC_002582	567	587	+	CGCCTACATCGGCGGCGGCGG
ERF	XLOC_043772	110	124	-	GCGCCGCCGCCGCCG
ERF	XLOC_043772	104	118	-	CCGCCGCCGCCGCGG
ERF	XLOC_035128	181	200	-	CGCCGCCACCGTCGTCGCCA

## Sheet: Pokkali
Table S7: List of lncRNA targeted transcription factors.
Family	sequence name	start	stop	strand	matched sequence
BBR-BPC	XLOC_057699	246	269	-	GAGAGAGAGAGAGAGAGAGAGAGG
BBR-BPC	XLOC_057699	248	271	-	CAGAGAGAGAGAGAGAGAGAGAGA
ERF	XLOC_054216	823	843	-	CCGCCGCCGCCGCCGCCGCCG
BBR-BPC	XLOC_057699	244	267	-	GAGAGAGAGAGAGAGAGAGAGGAA
ERF	XLOC_054216	824	844	-	GCCGCCGCCGCCGCCGCCGCC
BBR-BPC	XLOC_057699	242	265	-	GAGAGAGAGAGAGAGAGAGGAAAA
ERF	XLOC_014043	88	108	-	TCGCCGCCGCCGCCGCCGCCG
ERF	XLOC_054216	826	846	-	TCGCCGCCGCCGCCGCCGCCG
C2H2	XLOC_035128	66	84	+	CCTCTTCCTCCTCCTCCTC
BBR-BPC	XLOC_057699	240	263	-	GAGAGAGAGAGAGAGAGGAAAAGA
ERF	XLOC_014043	89	109	-	TTCGCCGCCGCCGCCGCCGCC
BBR-BPC	XLOC_054216	1011	1034	+	TAGAGAGAGAGAGAGAGAGAGTGG
BBR-BPC	XLOC_057699	250	273	-	ATCAGAGAGAGAGAGAGAGAGAGA
BBR-BPC	XLOC_054216	1009	1032	+	GTTAGAGAGAGAGAGAGAGAGAGT
ERF	XLOC_054216	827	847	-	GTCGCCGCCGCCGCCGCCGCC
ERF	XLOC_054216	821	841	-	GCCGCCGCCGCCGCCGCCGTC
ERF	XLOC_014043	88	107	-	CGCCGCCGCCGCCGCCGCCG
ERF	XLOC_054216	823	842	-	CGCCGCCGCCGCCGCCGCCG
ERF	XLOC_054216	826	845	-	CGCCGCCGCCGCCGCCGCCG
BBR-BPC	XLOC_054216	1007	1030	+	GGGTTAGAGAGAGAGAGAGAGAGA
ERF	XLOC_054216	820	840	-	CCGCCGCCGCCGCCGCCGTCG
ERF	XLOC_005292	40	60	+	CCGCCGCCGCCGCCGCCGGCG
ERF	XLOC_054216	824	844	+	GGCGGCGGCGGCGGCGGCGGC
LBD	XLOC_014043	88	108	-	TCGCCGCCGCCGCCGCCGCCG
LBD	XLOC_054216	826	846	-	TCGCCGCCGCCGCCGCCGCCG
LBD	XLOC_054216	823	843	-	CCGCCGCCGCCGCCGCCGCCG
BBR-BPC	XLOC_054216	1013	1036	+	GAGAGAGAGAGAGAGAGAGTGGAG
Dof	XLOC_048354	398	418	-	TTTTCTTTTTCTCTTCTTTTT
BBR-BPC	XLOC_044558	211	234	+	CAGAGAGAGAGAGAGAGAGAATCA
ERF	XLOC_054216	820	839	-	CGCCGCCGCCGCCGCCGTCG
ERF	XLOC_054216	824	843	+	GGCGGCGGCGGCGGCGGCGG
ERF	XLOC_054216	818	838	-	GCCGCCGCCGCCGCCGTCGTC
ERF	XLOC_014043	82	102	-	CCGCCGCCGCCGCCGTTGCCA
BBR-BPC	XLOC_057699	238	261	-	GAGAGAGAGAGAGAGGAAAAGACG
ERF	XLOC_014043	91	110	-	CTTCGCCGCCGCCGCCGCCG
ERF	XLOC_005292	46	60	+	CCGCCGCCGCCGGCG
ERF	XLOC_014043	89	109	+	GGCGGCGGCGGCGGCGGCGAA
ERF	XLOC_014043	86	106	-	GCCGCCGCCGCCGCCGCCGTT
TALE	XLOC_044558	210	229	-	CTCTCTCTCTCTCTCTCTGC
ERF	XLOC_054216	823	843	+	CGGCGGCGGCGGCGGCGGCGG
ERF	XLOC_054216	821	840	+	GACGGCGGCGGCGGCGGCGG
ERF	XLOC_054216	829	848	-	CGTCGCCGCCGCCGCCGCCG
BBR-BPC	XLOC_054216	1015	1038	+	GAGAGAGAGAGAGAGAGTGGAGGG
ERF	XLOC_014043	83	103	-	GCCGCCGCCGCCGCCGTTGCC
ERF	XLOC_014043	88	106	+	CGGCGGCGGCGGCGGCGGC
ERF	XLOC_054216	823	841	+	CGGCGGCGGCGGCGGCGGC
ERF	XLOC_054216	826	844	+	CGGCGGCGGCGGCGGCGGC
ERF	XLOC_014043	85	105	-	CCGCCGCCGCCGCCGCCGTTG
LBD	XLOC_005292	40	60	+	CCGCCGCCGCCGCCGCCGGCG
ERF	XLOC_014043	91	109	+	CGGCGGCGGCGGCGGCGAA
C2H2	XLOC_048354	361	379	-	CTTCCTCCTCCTCTTCTTC
Dof	XLOC_048525	3008	3028	-	CAAGAAAAGAAAAAGTTAAAA
BBR-BPC	XLOC_035632	145	168	+	TGGAGAGAGAGAGAGAGAGGAAGG
LBD	XLOC_051299	325	345	+	TCGCCGCCGGCGCCTCCGCCG
ERF	XLOC_005292	39	59	+	CCCGCCGCCGCCGCCGCCGGC
BBR-BPC	XLOC_035632	147	170	+	GAGAGAGAGAGAGAGAGGAAGGTG
LBD	XLOC_054216	829	849	-
C2H2	XLOC_035128	63	81	+	CGTCCTCTTCCTCCTCCTC
ERF	XLOC_014043	89	108	+	GGCGGCGGCGGCGGCGGCGA
ERF	XLOC_054216	827	846	+	GGCGGCGGCGGCGGCGGCGA
BBR-BPC	XLOC_044558	213	236	+	GAGAGAGAGAGAGAGAGAATCAAT
Dof	XLOC_043574	398	418	-	TTTTCTTTTTCTCTTCTTCTT
ERF	XLOC_005292	41	55	+	CGCCGCCGCCGCCGC
ERF	XLOC_014043	90	104	-	CGCCGCCGCCGCCGC
ERF	XLOC_014043	93	107	-	CGCCGCCGCCGCCGC
ERF	XLOC_054216	825	839	-	CGCCGCCGCCGCCGC
ERF	XLOC_054216	828	842	-	CGCCGCCGCCGCCGC
ERF	XLOC_054216	831	845	-	CGCCGCCGCCGCCGC
ERF	XLOC_005292	39	57	-	CGGCGGCGGCGGCGGCGGG
ERF	XLOC_054216	827	847	+	GGCGGCGGCGGCGGCGGCGAC
HD-ZIP	XLOC_040419	795	815	-	AAATCAATAATTGAATATATT
HD-ZIP	XLOC_034986	570	590	+	AAATCAATAATTGAATATATT
ERF	XLOC_054216	817	837	-	CCGCCGCCGCCGCCGTCGTCT
C2H2	XLOC_035128	60	78	+	CCTCGTCCTCTTCCTCCTC
ERF	XLOC_010368	258	277	-	GGCGGCGGAGGTGGTGGTGC
BBR-BPC	XLOC_006019	7	30	-	AAGAGAGAGAGAGAGAGACTGAGC
ERF	XLOC_054216	821	841	+	GACGGCGGCGGCGGCGGCGGC
C2H2	XLOC_035128	69	87	+	CTTCCTCCTCCTCCTCCTG
ERF	XLOC_005292	40	54	+	CCGCCGCCGCCGCCG
ERF	XLOC_005292	43	57	+	CCGCCGCCGCCGCCG
ERF	XLOC_005292	40	54	+	CCGCCGCCGCCGCCG
ERF	XLOC_005292	43	57	+	CCGCCGCCGCCGCCG
ERF	XLOC_014043	88	102	-	CCGCCGCCGCCGCCG
ERF	XLOC_014043	91	105	-	CCGCCGCCGCCGCCG
ERF	XLOC_054216	823	837	-	CCGCCGCCGCCGCCG
ERF	XLOC_054216	826	840	-	CCGCCGCCGCCGCCG
ERF	XLOC_054216	829	843	-	CCGCCGCCGCCGCCG
ERF	XLOC_014043	88	102	-	CCGCCGCCGCCGCCG
ERF	XLOC_014043	91	105	-	CCGCCGCCGCCGCCG
ERF	XLOC_054216	823	837	-	CCGCCGCCGCCGCCG
ERF	XLOC_054216	826	840	-	CCGCCGCCGCCGCCG
ERF	XLOC_054216	829	843	-	CCGCCGCCGCCGCCG
ERF	XLOC_005292	40	54	+	CCGCCGCCGCCGCCG
ERF	XLOC_005292	43	57	+	CCGCCGCCGCCGCCG
ERF	XLOC_014043	88	102	-	CCGCCGCCGCCGCCG
ERF	XLOC_014043	91	105	-	CCGCCGCCGCCGCCG
ERF	XLOC_054216	823	837	-	CCGCCGCCGCCGCCG
ERF	XLOC_054216	826	840	-	CCGCCGCCGCCGCCG
ERF	XLOC_054216	829	843	-	CCGCCGCCGCCGCCG
Dof	XLOC_048354	397	417	+	AAAAAAGAAGAGAAAAAGAAA
ERF	XLOC_014043	88	108	+	CGGCGGCGGCGGCGGCGGCGA
ERF	XLOC_054216	826	846	+	CGGCGGCGGCGGCGGCGGCGA
LBD	XLOC_014043	91	111	-	ACTTCGCCGCCGCCGCCGCCG
C2H2	XLOC_048354	364	382	-	CATCTTCCTCCTCCTCTTC
BBR-BPC	XLOC_044558	209	232	+	TGCAGAGAGAGAGAGAGAGAGAAT
BBR-BPC	XLOC_006019	9	32	-	AGAAGAGAGAGAGAGAGAGACTGA
ERF	XLOC_045627	265	285	-	CCGCCTCCGCCTCCGCCTCCG
ERF	XLOC_005292	40	54	+	CCGCCGCCGCCGCCG
ERF	XLOC_005292	43	57	+	CCGCCGCCGCCGCCG
ERF	XLOC_014043	88	102	-	CCGCCGCCGCCGCCG
ERF	XLOC_014043	91	105	-	CCGCCGCCGCCGCCG
ERF	XLOC_054216	823	837	-	CCGCCGCCGCCGCCG
ERF	XLOC_054216	826	840	-	CCGCCGCCGCCGCCG
ERF	XLOC_054216	829	843	-	CCGCCGCCGCCGCCG
Dof	XLOC_050893	389	409	-	CTTTCTTTTTCTTTTCTTCTT
ERF	XLOC_000467	500	514	+	GGAGGTGGCGGTGGA
ERF	XLOC_054216	820	840	+	CGACGGCGGCGGCGGCGGCGG
BBR-BPC	XLOC_005930	15	38	-	GAGAGAGAGAGAGGGAGATCGAAG
BBR-BPC	XLOC_048525	61	84	-	GACATGGAGAGAGAAAGAGAGAGC
Dof	XLOC_006019	409	429	-	TTTTCTTTTTTTCTTCTCTCT
ERF	XLOC_054216	829	849	-	TCGTCGCCGCCGCCGCCGCCG
BBR-BPC	XLOC_044558	207	230	+	GCTGCAGAGAGAGAGAGAGAGAGA
Dof	XLOC_001451	557	577	-	TTTTCTTTTATTTTTCTTTCT
Dof	XLOC_048525	3007	3020	-	GAAAAAGTTAAAAA
C3H	XLOC_048525	3010	3023	-	AAAGAAAAAGTTAA
ERF	XLOC_006629	609	623	-	CCGCCGCCGCCGCTA
ERF	XLOC_054216	829	847	+	CGGCGGCGGCGGCGGCGAC
ERF	XLOC_010368	257	277	-	GGCGGCGGAGGTGGTGGTGCT
ERF	XLOC_002582	576	595	-	CCCCGACGCCGCCGCCGCCG
Dof	XLOC_054216	624	644	-	CTCTCTTTTTTCTTTCTTTTT
Dof	XLOC_054216	623	643	+	GAAAAAGAAAGAAAAAAGAGA
C2H2	XLOC_048354	367	385	-	CGTCATCTTCCTCCTCCTC
Dof	XLOC_054216	617	637	+	AGAAAAGAAAAAGAAAGAAAA
ERF	XLOC_005292	40	54	-	CGGCGGCGGCGGCGG
ERF	XLOC_005292	43	57	-	CGGCGGCGGCGGCGG
ERF	XLOC_014043	88	102	+	CGGCGGCGGCGGCGG
ERF	XLOC_014043	91	105	+	CGGCGGCGGCGGCGG
ERF	XLOC_054216	823	837	+	CGGCGGCGGCGGCGG
ERF	XLOC_054216	826	840	+	CGGCGGCGGCGGCGG
ERF	XLOC_054216	829	843	+	CGGCGGCGGCGGCGG
ERF	XLOC_054216	832	851	-	CGTCGTCGCCGCCGCCGCCG
ERF	XLOC_001451	316	330	-	GGAGGTGGCGGTGGT
ERF	XLOC_005292	41	60	+	CGCCGCCGCCGCCGCCGGCG
Dof	XLOC_050893	383	403	-	TTTTCTTTTCTTCTTCTTCTT
ERF	XLOC_006629	609	623	-	CCGCCGCCGCCGCTA
ERF	XLOC_014043	87	101	-	CGCCGCCGCCGCCGT
ERF	XLOC_054216	822	836	-	CGCCGCCGCCGCCGT
BBR-BPC	XLOC_006019	5	28	-	GAGAGAGAGAGAGAGACTGAGCTC
ERF	XLOC_054216	815	835	-	GCCGCCGCCGCCGTCGTCTTC
BBR-BPC	XLOC_054216	1003	1026	+	GTGTGGGTTAGAGAGAGAGAGAGA
BBR-BPC	XLOC_005930	17	40	-	TGGAGAGAGAGAGAGGGAGATCGA
ERF	XLOC_054216	830	850	-	GTCGTCGCCGCCGCCGCCGCC
Dof	XLOC_034986	400	420	-	TTTTCTTTTCTCTCTCTTTTT
ERF	XLOC_045627	268	287	-	CGCCGCCTCCGCCTCCGCCT
ERF	XLOC_009885	391	411	-	GGAGGTGGAGAAGACGGTGGA
ERF	XLOC_054216	820	834	-	CCGCCGCCGCCGTCG
Dof	XLOC_048525	3006	3026	-	AGAAAAGAAAAAGTTAAAAAA
Dof	XLOC_030132	1926	1946	+	TTTTCTTTTTCTTTTCCTTCT
ERF	XLOC_054216	820	838	+	CGACGGCGGCGGCGGCGGC
ERF	XLOC_005292	40	60	-	CGCCGGCGGCGGCGGCGGCGG
ERF	XLOC_014043	79	99	+	TGCTGGCAACGGCGGCGGCGG
Dof	XLOC_048354	404	424	-	CTTTCTTTTTCTTTTTCTCTT
ERF	XLOC_054216	820	834	-	CCGCCGCCGCCGTCG
ERF	XLOC_054216	820	834	-	CCGCCGCCGCCGTCG
BBR-BPC	XLOC_006019	13	36	-	CATGAGAAGAGAGAGAGAGAGAGA
BBR-BPC	XLOC_057699	252	275	-	GCATCAGAGAGAGAGAGAGAGAGA
ERF	XLOC_054216	830	849	+	GGCGGCGGCGGCGGCGACGA
ERF	XLOC_045627	266	286	+	GGAGGCGGAGGCGGAGGCGGC
bZIP	XLOC_043574	3783	3797	+	ACTGATGACGTGGCA
ERF	XLOC_014043	94	108	-	TCGCCGCCGCCGCCG
ERF	XLOC_054216	832	846	-	TCGCCGCCGCCGCCG
ERF	XLOC_014043	94	108	-	TCGCCGCCGCCGCCG
ERF	XLOC_054216	832	846	-	TCGCCGCCGCCGCCG
C2H2	XLOC_053468	33	51	-	CCTGATCCTCCTCCTCCTC
ERF	XLOC_000467	500	514	+	GGAGGTGGCGGTGGA
ERF	XLOC_000467	500	514	+	GGAGGTGGCGGTGGA
BBR-BPC	XLOC_035632	149	172	+	GAGAGAGAGAGAGAGGAAGGTGGT
Dof	XLOC_048354	400	420	+	AAAGAAGAGAAAAAGAAAAAG
BBR-BPC	XLOC_001451	548	571	+	AAGAAAGAGAGAAAGAAAAATAAA
ERF	XLOC_005292	40	54	+	CCGCCGCCGCCGCCG
ERF	XLOC_005292	43	57	+	CCGCCGCCGCCGCCG
ERF	XLOC_014043	88	102	-	CCGCCGCCGCCGCCG
ERF	XLOC_014043	91	105	-	CCGCCGCCGCCGCCG
ERF	XLOC_054216	823	837	-	CCGCCGCCGCCGCCG
ERF	XLOC_054216	826	840	-	CCGCCGCCGCCGCCG
ERF	XLOC_054216	829	843	-	CCGCCGCCGCCGCCG
Dof	XLOC_048354	3891	3911	+	AGAAAAGAAAAAATAAAGAGG
ERF	XLOC_045627	262	281	-	CTCCGCCTCCGCCTCCGACG
Dof	XLOC_043574	403	423	-	TTTTCTTTTCTTTTTCTCTTC
ERF	XLOC_054216	814	834	+	AGAAGACGACGGCGGCGGCGG
WRKY	XLOC_005292	477	491	-	ACCGTTGACTTTTTA
BBR-BPC	XLOC_005930	21	44	-	ATGGTGGAGAGAGAGAGAGGGAGA
ERF	XLOC_014043	86	106	+	AACGGCGGCGGCGGCGGCGGC
BBR-BPC	XLOC_034986	14	37	-	GGGAGAGAGAGAGAAGAGGAGAGC
BBR-BPC	XLOC_045515	649	672	+	TATATATAGAGAGAGAGAGAAATA
ERF	XLOC_054216	834	848	-	CGTCGCCGCCGCCGC
Dof	XLOC_024362	156	176	+	TTTTTTTTTTATTTTATTTTT
WRKY	XLOC_005292	479	491	-	ACCGTTGACTTTT
ERF	XLOC_054216	820	834	+	CGACGGCGGCGGCGG
BBR-BPC	XLOC_006019	15	38	-	GACATGAGAAGAGAGAGAGAGAGA
ERF	XLOC_005292	39	59	-	GCCGGCGGCGGCGGCGGCGGG
ERF	XLOC_054216	820	834	-	CCGCCGCCGCCGTCG
ERF	XLOC_005292	43	63	+	CCGCCGCCGCCGCCGGCGGTG
ERF	XLOC_014043	91	111	-	ACTTCGCCGCCGCCGCCGCCG
ERF	XLOC_005292	38	57	+	GCCCGCCGCCGCCGCCGCCG
ERF	XLOC_014043	85	105	+	CAACGGCGGCGGCGGCGGCGG
MYB	XLOC_049782	1015	1029	+	ATATTGGTAGGTGGG
ERF	XLOC_014043	94	108	-	TCGCCGCCGCCGCCG
ERF	XLOC_054216	832	846	-	TCGCCGCCGCCGCCG
WRKY	XLOC_005292	478	491	-	ACCGTTGACTTTTT
ERF	XLOC_014043	82	102	+	TGGCAACGGCGGCGGCGGCGG
BBR-BPC	XLOC_050893	9	32	-	GGGAGAGAAAGAGAGAGATGAAGC
ERF	XLOC_054216	814	834	-	CCGCCGCCGCCGTCGTCTTCT
ERF	XLOC_014043	83	103	+
BBR-BPC	XLOC_034986	397	420	+	AAGAAAAAGAGAGAGAAAAGAAAA
ERF	XLOC_054216	818	838	+	GACGACGGCGGCGGCGGCGGC
ERF	XLOC_054216	817	837	+	AGACGACGGCGGCGGCGGCGG
Dof	XLOC_035287	80	100	+	CAAAAAGGAGAAAGAGAAAAG
BBR-BPC	XLOC_034986	12	35	-	GAGAGAGAGAGAAGAGGAGAGCTC
BBR-BPC	XLOC_035632	143	166	+	ACTGGAGAGAGAGAGAGAGAGGAA
BBR-BPC	XLOC_050893	389	412	+	AAGAAGAAAAGAAAAAGAAAGAGA
ERF	XLOC_010368	264	278	+	CCACCTCCGCCGCCC
WRKY	XLOC_005292	477	490	-	CCGTTGACTTTTTA
ERF	XLOC_000467	494	514	+	GCTGCTGGAGGTGGCGGTGGA
Dof	XLOC_050893	393	413	+	AGAAAAGAAAAAGAAAGAGAA
ERF	XLOC_005292	42	60	-	CGCCGGCGGCGGCGGCGGC
ERF	XLOC_045627	265	284	-	CGCCTCCGCCTCCGCCTCCG
TALE	XLOC_057699	247	266	+	CTCTCTCTCTCTCTCTCTCT
TALE	XLOC_057699	249	268	+	CTCTCTCTCTCTCTCTCTCT
TALE	XLOC_057699	251	270	+	CTCTCTCTCTCTCTCTCTCT
TALE	XLOC_054216	1012	1031	-	CTCTCTCTCTCTCTCTCTCT
ERF	XLOC_000467	499	517	+
TALE	XLOC_035632	146	165	-	TCCTCTCTCTCTCTCTCTCC
Dof	XLOC_048354	3881	3901	-	TTTTCTTTTCTTCATTATTTT
ERF	XLOC_006629	609	623	+	TAGCGGCGGCGGCGG
BBR-BPC	XLOC_048354	406	429	+	GAGAAAAAGAAAAAGAAAGACTGA
LBD	XLOC_054216	820	840	-	CCGCCGCCGCCGCCGCCGTCG
MYB	XLOC_043574	3642	3656	-	CGTTTATGACGGTTA
C2H2	XLOC_035128	57	75	+	CTTCCTCGTCCTCTTCCTC
Dof	XLOC_045209	108	128	+	TTGTCTTTTTAATTTTTTTCA
BBR-BPC	XLOC_057699	236	259	-	GAGAGAGAGAGAGGAAAAGACGAC
C3H	XLOC_048525	4007	4020	-	AAGCAAAAAGGTAA
ERF	XLOC_054216	820	834	-	CCGCCGCCGCCGTCG
ERF	XLOC_010368	256	275	+	CAGCACCACCACCTCCGCCG
MYB	XLOC_049782	1019	1039	-	ATCCAAATACCCCACCTACCA
ERF	XLOC_035128	209	228	+	GGCGGCGGAGGAGCGGGTGG
ERF	XLOC_010368	259	278	+	CACCACCACCTCCGCCGCCC
ERF	XLOC_006629	609	623	-	CCGCCGCCGCCGCTA
ERF	XLOC_006629	609	623	-	CCGCCGCCGCCGCTA
Dof	XLOC_005930	3254	3274	-	TAAAAAGTAAAAAAAATGTGG
ERF	XLOC_051299	324	344	+	ATCGCCGCCGGCGCCTCCGCC
ERF	XLOC_014043	79	99	-	CCGCCGCCGCCGTTGCCAGCA
BBR-BPC	XLOC_044558	215	238	+	GAGAGAGAGAGAGAGAATCAATGG
EIL	XLOC_035694	34	48	+	GTCCAGGTTCAATGT
WRKY	XLOC_005292	479	491	-	ACCGTTGACTTTT
ERF	XLOC_014043	96	110	-	CTTCGCCGCCGCCGC
ERF	XLOC_010368	260	280	-	GAGGGCGGCGGAGGTGGTGGT
ERF	XLOC_035128	116	136	+	TGCTGCTGTGGTGGTGGTGGA
ERF	XLOC_014043	80	100	-	GCCGCCGCCGCCGTTGCCAGC
ERF	XLOC_002582	576	590	-	ACGCCGCCGCCGCCG
ERF	XLOC_002582	576	590	-	ACGCCGCCGCCGCCG
ERF	XLOC_051299	326	345	+	CGCCGCCGGCGCCTCCGCCG
ERF	XLOC_001451	316	330	-	GGAGGTGGCGGTGGT
ERF	XLOC_001451	316	330	-	GGAGGTGGCGGTGGT
C2H2	XLOC_053468	753	772	-	TAAGAAACGACAAAATTATT
MYB	XLOC_048525	2359	2379	+	AATGTTGAGGATAAAGATGAT
BBR-BPC	XLOC_048525	63	86	-	CGGACATGGAGAGAGAAAGAGAGA
MIKC_MADS	XLOC_006652	48	61	-	ACAAAAGAGGAAAG
MIKC_MADS	XLOC_006652	48	61	-	ACAAAAGAGGAAAG
ERF	XLOC_054212	578	592	+	CTTCCTCCGCCGGCG
BBR-BPC	XLOC_045515	647	670	+	TATATATATAGAGAGAGAGAGAAA
ERF	XLOC_005292	42	62	+	GCCGCCGCCGCCGCCGGCGGT
BBR-BPC	XLOC_005930	19	42	-	GGTGGAGAGAGAGAGAGGGAGATC
Dof	XLOC_048525	3170	3190	+	TTTATTTTTTTATATTTTTAT
Dof	XLOC_054216	613	633	-	CTTTCTTTTTCTTTTCTGCTT
Dof	XLOC_040333	99	112	-	CAAAAAGGAAAAAA
ERF	XLOC_001451	313	331	-	GGGAGGTGGCGGTGGTGGC
Dof	XLOC_043574	400	420	+	GAAGAAGAGAAAAAGAAAAGA
BBR-BPC	XLOC_048354	404	427	+	AAGAGAAAAAGAAAAAGAAAGACT
ERF	XLOC_014043	85	99	-	CCGCCGCCGCCGTTG
Dof	XLOC_043574	3438	3458	+	AAAAAAGGAGAAAGGAGAGAA
ERF	XLOC_051299	324	344	-	GGCGGAGGCGCCGGCGGCGAT
ERF	XLOC_045627	268	288	-	GCGCCGCCTCCGCCTCCGCCT
ERF	XLOC_014043	92	111	+	GGCGGCGGCGGCGGCGAAGT
ERF	XLOC_014043	94	108	+	CGGCGGCGGCGGCGA
ERF	XLOC_054216	832	846	+	CGGCGGCGGCGGCGA
C2H2	XLOC_051299	172	190	-	CCTCCTCCTCCTTCTACAC
BBR-BPC	XLOC_040333	331	354	-	ATTAGGGAGAGAGGGAGGGAGATA
ERF	XLOC_014043	141	161	+	ATCTCCGCCGCCGACGACGAC
bZIP	XLOC_043574	3783	3797	-	TGCCACGTCATCAGT
BBR-BPC	XLOC_001451	542	565	+	AGGAAGAAGAAAGAGAGAAAGAAA
BBR-BPC	XLOC_001451	544	567	+	GAAGAAGAAAGAGAGAAAGAAAAA
WRKY	XLOC_005292	479	491	-	ACCGTTGACTTTT
bZIP	XLOC_043574	3783	3797	+	ACTGATGACGTGGCA
Dof	XLOC_035694	1	21	+	AAAAAGGGGAAAGAAAAAAAA
WRKY	XLOC_005292	477	489	-	CGTTGACTTTTTA
ERF	XLOC_002582	567	587	+	CGCCTACATCGGCGGCGGCGG
ERF	XLOC_014043	94	108	-	TCGCCGCCGCCGCCG
ERF	XLOC_054216	832	846	-	TCGCCGCCGCCGCCG
ERF	XLOC_035128	181	200	-	CGCCGCCACCGTCGTCGCCA
